# Supplementary material for: A Comprehensive Peptidomic Approach to Characterize the Protein Profile of Selected Durum Wheat Genotypes: Implication for Coeliac Disease and Wheat Allergy
Source: Nutrients. 2019 Oct 1;11(10):2321. doi: 10.3390/nu11102321 (PMC6835779; doi:10.3390/nu11102321)
Supplement: Supplementary file 1 [file nutrients-11-02321-s001.xlsx]

## Sheet: Figure S1
Figure S1. Comparison of the total protein content assayed in all protein fractions collected for each genotype. Statistically significant differences at a significance level of 5% between the reference sample and each genotype under investigation were determined by multiple t-tests and highlighted with asterisks.

## Sheet: Figure S2
Figure S2. SDS-PAGE of the three protein fractions F1 (a), F2 (b), F3 (c) for all five wheat genotypes. Fractions F1 and F2 were separated on a 4-20% gradient gel, whereas the fraction F3 was separated on a 12% gel. *According to the bottom-up protein identification we expected as α–amylase inhibitors: CM16 (15 kDa, Tri a 40), CM2 (15kDa, Tri a 29), CMX1/CMX3 (16 kDa, Tri a CMX) tetrameric α-amyl…

## Sheet: Table S1
Table S1: Full list of proteins and peptides identified in Osborne protein fractions (multiconsensus of peptide pools obtained with CHY and THE/CHY);
Checked	Master	Accession	Description	Coverage	# Peptides	# PSMs	# Unique Peptides	# Protein Groups	# AAs	MW [kDa]	calc. pI	Found in Sample Group: 1_AG38Duetto	Found in Sample Group: 5_AG167PI	Found in Sample Group: S_Semola	Found in Sample Group: 4_AG77Neolatino	Found in Sample Group: 3_AG69Lloyd	Found in Sample Group: SI_SemolaIntegrale	Found in Sample Group: 2_AG33Colosseo	Score Sequest HT	# Peptides Sequest HT
TRUE	Master Protein	Q9XGF0	Low molecular weight glutenin subunit (Fragment) OS=Triticum turgidum subsp. durum OX=4567 GN=lmw-gs PE=4 SV=1	76.9648	51	4592	1	1	369	42.2	8.35	H	H	H	H	H	H	H	3303.4	51
	Confidence	Sequence	Modifications	# Protein Groups	# Proteins	# PSMs	Master Protein Accessions	# Missed Cleavages	Theo. MH+ [Da]	Sequence Length	Found in Sample Group: 1_AG38Duetto	Found in Sample Group: 5_AG167PI	Found in Sample Group: S_Semola	Found in Sample Group: 4_AG77Neolatino	Found in Sample Group: 3_AG69Lloyd	Found in Sample Group: SI_SemolaIntegrale	Found in Sample Group: 2_AG33Colosseo	XCorr Sequest HT	Charge Sequest HT	m/z [Da] Sequest HT	DeltaM [ppm] Sequest HT	RT [min] Sequest HT
	H	AHGTF		21	178	41	Q38L53; G9AYK6; X2J8E3; F1C945; Q5MFH0; R9XUD0; P93794; A0A1U9XLA9; Q84NE4; F1C943; X2JAE7; A0A1D6L3W9; D0ES16; Q9XGF0; Q84U16; Q6QGW0; A0A089VKK4; Q2L990; A0A0A0QYP7; K7R468; Q38L52	0	532.251	5	H	NF	H	H	H	H	H	1.46	1	532.251	-0.49	3.0046
	H	ARSQML		49	270	7	D0F0C5; J9QEK9; D0ES12; B2LWZ2; G0YLZ2; G9AYK6; A0A2P1BXV0; B5A810; C8CCM7; Q6J6V0; R4JFH5; A0A346R8U1; R4JAP5; A9YWM3; D3U329; P93794; J9QFV1; C6K8R8; A0A287EIZ3; F5A7G7; B5A816; Q84NE4; A0A2R4Q9T1; A0A346R8U2; F6KHQ0; R4JB62; D0ES19; B5A813; F1C940; A0A0U3AIG6; Q5XXZ9; D5FPE9; Q9XGF0; A8CA05; Q3YB17; B2LWZ6; A0A346R8T9; Q84U16; T1LG74; A0A346R8T7; A0A2R4Q9V4; A0A346R8T6; A0A089VKK4; Q2L990; A0A…	0	705.371	6	H	NF	H	H	H	H	H	1.23	1	705.37	-1.74	3.2777
	H	EAIRAIVY		16	69	218	D3UAL8; B2LWZ2; B5A810; A2IBV5; Q6J6U9; Q8W3W8; Q8W3X4; Q9XGF0; A7XDG0; F6M7E1; B2LWZ6; A0A346R8T9; A0A346R8T6; Q0Q2J1; Q8W3X0; B2Y2R6	0	934.536	8	H	H	H	H	H	H	H	2.52	2	467.771	-0.08	13.5366
	H	GQCVSQPQQQSQQQL	1xCarbamidomethyl [C3]	29	250	20	Q5PU42; D0F0C5; K7WV80; A0A3G3C4J5; Q1ZZT4; A0A165R8I1; C8CCM2; D0ES12; R9XVA5; H6VLQ1; C8CCM7; R4JFH5; A2IBV5; Q0PW08; Q8W3W8; R4JDM1; Q5MFK8; K0I5W1; A0A0U3AGE0; F1C940; H6VLQ3; Q9XGF0; Q3YB17; Q3YB18; Q5MFH4; T1LG74; A0A346R8T7; A0A2R4Q9V4; Q8W3X0	0	1743.81	15	H	NF	H	H	H	H	H	2.8	2	872.408	0.44	5.8298
	H	GQQPQQQQL		29	250	39	D0F0C5; K7WV80; A0A3G3C4J5; A0A165R8I1; D0ES12; R9XVA5; A0A0A0R2J7; G9AYK6; X2J8E3; R4JFH5; P93794; Q84NE4; R4JDM1; Q5MFK8; Q2PQJ6; A0A346R8U2; D0ES19; F1C940; Q9XGF0; Q3YB17; Q5MFH4; T1LG74; A0A346R8T7; A0A2R4Q9V4; A0A089VKK4; Q2L990; A0A0A0QYP7; B8XU51; B2LX00	0	1054.53	9	H	H	H	H	H	H	H	2.05	1	1054.53	-0.47	3.9132
	H	GVGTGVGA		51	250	18	Q5PU42; D0F0C5; K7WV80; A0A3G3C4J5; Q1ZZT4; A0A165R8I1; B8XU59; P93792; D0PX24; C6K8R4; D0ES12; B2LWZ2; G9AYK6; H6VLQ1; I3QPG3; Q8W3V8; B5A810; F4YT76; R4JFH5; A0A346R8U1; D2DII6; Q0PW08; F5A7G7; B5A816; I3QPG6; A0A346R8U2; Q41547; H9XH00; Q84U17; A0A0U3AGE0; B5A813; F1C940; Q5XXZ9; K7XED4; D7RFI1; F8SGM2; R4JD66; I3QPG4; Q9XGF0; Q8H0J4; Q3YB17; B2LWZ6; A0A346R8T9; K7XED9; Q6B780; T1LG74; A0A346R…	0	617.325	8	H	H	H	H	H	H	H	2.13	1	617.325	-0.69	3.6119
	H	GVGTGVGAY		51	250	8	Q5PU42; D0F0C5; K7WV80; A0A3G3C4J5; Q1ZZT4; A0A165R8I1; B8XU59; P93792; D0PX24; C6K8R4; D0ES12; B2LWZ2; G9AYK6; H6VLQ1; I3QPG3; Q8W3V8; B5A810; F4YT76; R4JFH5; A0A346R8U1; D2DII6; Q0PW08; F5A7G7; B5A816; I3QPG6; A0A346R8U2; Q41547; H9XH00; Q84U17; A0A0U3AGE0; B5A813; F1C940; Q5XXZ9; K7XED4; D7RFI1; F8SGM2; R4JD66; I3QPG4; Q9XGF0; Q8H0J4; Q3YB17; B2LWZ6; A0A346R8T9; K7XED9; Q6B780; T1LG74; A0A346R…	0	780.389	9	H	NF	H	H	H	NF	NF	1.63	1	780.388	-0.51	10.1166
	H	LQPHQLAQL		53	256	324	D0F0C5; K7WV80; A9YRN9; C6K8R4; A0A287EFH8; D0ES12; B2LWZ2; G0YLZ2; G9AYK6; A0A2P1BXV0; Q670S2; B5A810; C8CCM7; Q6J6V0; R4JAP5; A9YWM3; D3U329; P93794; J9QFV1; C6K8R8; A0A287EIZ3; F5A7G7; B5A816; Q84NE4; A0A2R4Q9T1; A0A346R8U2; F6KHQ0; Q40026; R4JB62; Q84U17; B5A813; F1C940; A0A0U3AIG6; Q5XXZ9; C8CCM8; D5FPE9; Q9XGF0; A0A287EFG2; A8CA05; Q3YB17; B2LWZ6; A0A346R8T9; Q84U16; A0A346R8T7; A0A2R4Q9V4;…	2	1047.59	9	H	H	H	H	H	H	H	2.76	2	524.301	1.03	10.8766
	H	PPFSQQQQPPFSQQQQPVLPQQPSFSQQQL		8	32	15	D3UAL8; R9XVA5; D5FPE3; A2IBV5; Q8W3X4; Q9XGF0; Q8W3X0; B2Y2R6	4	3477.72	30	H	H	NF	H	H	H	H	1.66	3	1159.91	0.07	28.8574
	H	PPFSQQQQPPFSQQQQPVLPQQPSFSQQQLPPF	2xDeamidated [Q]	8	32	14	D3UAL8; R9XVA5; D5FPE3; A2IBV5; Q8W3X4; Q9XGF0; Q8W3X0; B2Y2R6	5	3820.86	33	H	NF	NF	H	H	NF	NF	1.91	3	1274.3	2.62	28.2599
	H	QPHQLAQL		53	256	14	D0F0C5; K7WV80; A9YRN9; C6K8R4; A0A287EFH8; D0ES12; B2LWZ2; G0YLZ2; G9AYK6; A0A2P1BXV0; Q670S2; B5A810; C8CCM7; Q6J6V0; R4JAP5; A9YWM3; D3U329; P93794; J9QFV1; C6K8R8; A0A287EIZ3; F5A7G7; B5A816; Q84NE4; A0A2R4Q9T1; A0A346R8U2; F6KHQ0; Q40026; R4JB62; Q84U17; B5A813; F1C940; A0A0U3AIG6; Q5XXZ9; C8CCM8; D5FPE9; Q9XGF0; A0A287EFG2; A8CA05; Q3YB17; B2LWZ6; A0A346R8T9; Q84U16; A0A346R8T7; A0A2R4Q9V4;…	1	934.51	8	H	NF	H	H	H	H	H	1.53	2	467.759	0.32	5.8896
	H	QQLNPCKVF	1xCarbamidomethyl [C6]	46	251	287	D0F0C5; K7WV80; N1R0S5; K7WV72; G0YLZ2; G9AYK6; A0A2P1BXV0; I3QPG3; A0A346R8U0; Q6J6V0; R4JFH5; A0A346R8U1; R4JAP5; Q6J6U9; A0A2R4Q9T7; D3U329; R4JFK3; P93794; C6K8R8; A0A287EIZ3; B5A816; Q84NE4; I3QPH1; A0A2R4Q9T1; A0A346R8U2; Q40026; R4JB62; A0A0U3AIG6; D7RFI1; R4JD66; A0A2R4Q9U1; A0A2R4Q9S8; Q9XGF0; A8CA05; Q3YB17; B2LWZ6; A0A346R8T7; A0A2R4Q9V4; A0A346R8T6; A0A089VKK4; A8IEC6; A0A2R4Q9S5; B2L…	1	1133.58	9	H	H	H	H	H	H	H	2.56	2	567.292	0.33	14.0594
	H	QQLNPCKVF	1xGln->pyro-Glu [N-Term]; 1xCarbamidomethyl [C6]	46	250	108	D0F0C5; K7WV80; N1R0S5; K7WV72; G0YLZ2; G9AYK6; A0A2P1BXV0; I3QPG3; A0A346R8U0; Q6J6V0; R4JFH5; A0A346R8U1; R4JAP5; Q6J6U9; A0A2R4Q9T7; D3U329; R4JFK3; P93794; C6K8R8; A0A287EIZ3; B5A816; Q84NE4; I3QPH1; A0A2R4Q9T1; A0A346R8U2; Q40026; R4JB62; A0A0U3AIG6; D7RFI1; R4JD66; A0A2R4Q9U1; A0A2R4Q9S8; Q9XGF0; A8CA05; Q3YB17; B2LWZ6; A0A346R8T7; A0A2R4Q9V4; A0A346R8T6; A0A089VKK4; A8IEC6; A0A2R4Q9S5; B2L…	1	1116.55	9	H	H	H	H	H	H	H	1.47	1	1116.55	0.02	23.8566
	H	QQQCCQQL	2xCarbamidomethyl [C4; C5]	66	374	29	D0F0C5; M7ZW11; K7WV80; N1R0S5; B6UKM2; C6K8R4; A0A287EFH8; D0ES12; Q84M19; E5FF15; W8E194; A0A0N7A5G3; I3QPG3; A0A0K2GSM3; W8E1A2; K7WZA8; P06471; Q6J6V0; R4JFH5; F5A7G9; R4JAP5; H8Y0E0; Q6J6U9; D3U329; A0A024A3B7; R4JFK3; P93794; E3UTY1; Q0PIV6; W8E6H6; A0A287EIZ3; A0A0K2GRS0; H8Y0M0; A0A0N7A547; I3QPH1; A0A2R4Q9T1; C5MQZ6; Q40026; A0A0N7A503; B6UKR2; B6UKQ9; W8E6G7; E5FF35; K7XED4; A0A0N7A522;…	0	1092.46	8	H	H	H	H	H	H	H	1.53	1	1092.45	-1.04	3.8792
	H	QQQIPF	1xGln->pyro-Glu [N-Term]	20	115	122	A0A1D6PVA1; D3UAL8; A0A1D6PVM1; Q670S2; Q84U12; D5FPE3; A2IBV5; D5FPF1; A0A024A3B7; A0A3L6F0A4; Q8W3W8; Q5XXZ9; Q8W3X4; Q9XGF0; A7XDG0; B6SII5; Q0Q2J1; Q8W3X0; B2Y2R6; A0A0U3ATU4	0	743.372	6	H	H	H	H	H	H	H	1.23	1	743.372	-1	29.9125
	H	QQQLPF		20	115	466	A0A1D6PVA1; D3UAL8; A0A1D6PVM1; Q670S2; Q84U12; D5FPE3; A2IBV5; D5FPF1; A0A024A3B7; A0A3L6F0A4; Q8W3W8; Q5XXZ9; Q8W3X4; Q9XGF0; A7XDG0; B6SII5; Q0Q2J1; Q8W3X0; B2Y2R6; A0A0U3ATU4	1	760.399	6	H	H	H	H	H	H	H	1.53	1	760.399	0.15	17.7289
	H	RTLPTM		48	251	45	D0F0C5; N1R0S5; K7WV72; J9QEK9; A9YRN9; C6K8R4; G0YLZ2; A0A2P1BXV0; W8E197; W8E194; I3QPG3; W8E1A2; B5A810; C8CCM7; R4JFH5; Q5XXZ7; R4JAP5; A9YWM3; Q6J6U9; A0A2R4Q9T7; J9QFV1; W8E6H6; H8Y0M0; B5A816; W8E2L7; F6KHQ0; R4JB62; W8E6G7; B5A813; K7XED4; D7RFI1; C8CCM8; W8E0F4; A0A2R4Q9U1; A0A2R4Q9S8; W8E5R1; Q9XGF0; A8CA05; Q84U16; Q6B780; A0A346R8T7; A8IEC6; A0A0K2GRQ1; A0A2R4Q9S5; B6UKQ7; X2JC88; A8I…	1	718.392	6	H	H	H	H	H	H	H	1.27	1	718.39	-2.41	5.4248
	H	RTTTRVPF		10	44	59	D3UAL8; D5FPE3; A2IBV5; Q8W3W8; Q8W3X4; Q9XGF0; A7XDG0; Q0Q2J1; Q8W3X0; B2Y2R6	0	977.553	8	H	H	H	H	H	H	H	1.53	2	489.28	-0.34	3.8425
	H	SHIPGLERPSQQQPLPPQQTL	1xDeamidated [Q]; 1xAcetyl [N-Term]	1	1	902	Q9XGF0	2	2394.24	21	H	H	H	H	H	H	H	3.4	2	1197.63	4.21	19.9417
	H	SHIPGLERPSQQQPLPPQQTL		1	1	927	Q9XGF0	2	2351.25	21	H	H	H	H	H	H	H	4.44	2	1176.13	-0.83	15.6461
	H	SIILQEQQQVQGSIQTQQQQPQQL	1xDeamidated [Q]	11	56	20	D5FPE3; A2IBV5; Q8W3W8; A0A0U3AGE0; Q8W3X4; Q9XGF0; A7XDG0; Q0Q2J1; Q8W3X0; B2Y2R6; A0A0U3ATU4	1	2779.42	24	H	NF	H	NF	NF	NF	NF	1.27	3	927.151	6.02	23.8626
	H	SIILQEQQQVQGSIQTQQQQPQQL		11	56	84	D5FPE3; A2IBV5; Q8W3W8; A0A0U3AGE0; Q8W3X4; Q9XGF0; A7XDG0; Q0Q2J1; Q8W3X0; B2Y2R6; A0A0U3ATU4	1	2778.44	24	H	H	H	H	H	H	H	5.08	2	1389.72	0.61	24.0527
	H	SQQLPPFSQQQQPVLPQQPPF		8	32	23	D3UAL8; R9XVA5; D5FPE3; Q8W3X4; Q9XGF0; A7XDG0; Q8W3X0; B2Y2R6	3	2419.24	21	H	NF	H	H	H	H	H	1.79	2	1210.12	0.12	30.5488
	H	SQQQLPPF		14	97	16	D3UAL8; R9XVA5; D5FPE3; A2IBV5; R4JDM1; K0I5W1; A0A0U3AGE0; Q8W3X4; Q9XGF0; A7XDG0; Q0Q2J1; Q8W3X0; B2Y2R6; A0A0U3ATU4	1	944.484	8	H	NF	H	H	H	H	H	1.3	1	944.482	-1.97	19.3503
	H	SQQQLPPFSQQLPPF		10	36	54	D3UAL8; R9XVA5; D5FPE3; A2IBV5; Q8W3X4; Q9XGF0; A7XDG0; Q0Q2J1; Q8W3X0; B2Y2R6	3	1741.89	15	H	NF	H	H	H	H	H	1.95	2	871.45	1.33	32.9225
	H	SQQQLPPFSQQQQPPF		8	33	34	D3UAL8; R9XVA5; D5FPE3; A2IBV5; Q8W3X4; Q9XGF0; Q8W3X0; B2Y2R6	2	1884.92	16	H	H	H	H	H	H	H	1.97	2	942.964	-1.17	25.5109
	H	SQQQLPPFSQQQQPPFSQQQQPVLPQQPSF	1xDeamidated [Q]	8	32	4	D3UAL8; R9XVA5; D5FPE3; A2IBV5; Q8W3X4; Q9XGF0; Q8W3X0; B2Y2R6	4	3478.7	30	NF	NF	NF	NF	NF	H	NF	1.58	3	1160.25	5.33	30.7475
	H	SQQQLPPFSQQQQPPFSQQQQPVLPQQPSF		8	32	25	D3UAL8; R9XVA5; D5FPE3; A2IBV5; Q8W3X4; Q9XGF0; Q8W3X0; B2Y2R6	4	3477.72	30	H	NF	H	H	H	NF	H	2.49	3	1159.91	-0.56	30.8261
	H	SQQQQPPF		42	254	83	N1R0S5; A0A165R8I1; A9YRN9; B2LWZ2; A0A0A0R2J7; G9AYK6; A0A2P1BXV0; B5A810; C8CCM7; Q6J6V0; R4JFH5; Q5XXZ7; A9YWM3; Q6J6U9; A0A2R4Q9T7; D3U329; P93794; A0A0A0R2I8; B5A816; Q84NE4; A0A2R4Q9T1; Q2PQJ6; D0ES19; B5A813; A0A0U3AIG6; C8CCM8; D5FPE9; A0A2R4Q9U1; Q9XGF0; A8CA05; B2LWZ6; A0A346R8T9; Q84U16; T1LG74; A0A346R8T7; A0A346R8T6; A0A089VKK4; Q2L990; A0A0A0QYP7; A0A2R4Q9S5; B8XU51; X2JC88	0	959.458	8	H	H	H	H	H	H	H	2.1	2	480.233	-0.32	10.2887
	H	SQQQQPPFSQQQQPPF		49	266	54	A0A165R8I1; D3UAL8; B2LWZ2; R9XVA5; A0A0A0R2J7; G9AYK6; X2J8E3; F1C945; R9XV91; Q5MFH0; D5FPE3; B5A810; Q38L54; R4JFH5; A2IBV5; R9XUD0; P93794; A0A0A0R2I8; A0A1U9XLA9; C6KI71; Q8W3W8; Q84NE4; F1C943; A0A1G4P206; Q2PQJ6; X2JAE7; D0ES19; A0A024A269; Q8W3X4; D0ES20; D0ES16; R4JB44; Q9XGF0; A7XDG0; B2LWZ6; Q84U16; Q6QGW0; A0A068F8R5; T1LG74; A0A346R8T6; A0A089VKK4; A0A0A0QYP7; K7R468; B8XU51; V9P6N2;…	1	1899.9	16	H	H	H	H	H	H	H	4	2	950.452	-0.53	20.9553
	H	SQQQQPPFSQQQQPVLPQQPSF		10	38	48	D3UAL8; R9XVA5; D5FPE3; A2IBV5; Q8W3X4; Q9XGF0; A7XDG0; Q0Q2J1; Q8W3X0; B2Y2R6	2	2552.25	22	H	H	H	H	H	H	H	3.55	2	1276.63	0.92	25.5605
	H	SQQQQPPFSQQQQPVLPQQPSFSQQQLPPF		10	37	15	D3UAL8; R9XVA5; D5FPE3; A2IBV5; Q8W3X4; Q9XGF0; A7XDG0; Q0Q2J1; Q8W3X0; B2Y2R6	4	3477.72	30	H	NF	H	H	H	NF	H	1.85	3	1159.91	0.7	32.445
	H	SQQQQPVIPQQPPF		51	229	62	D0F0C5; N1R0S5; C6K8R4; D3UAL8; D0ES12; G0YLZ2; R9XVA5; A2IBK1; Q8W3X5; A0A2P1BXV0; B5TWK5; I3QPG3; Q84U12; D5FPE3; B5A810; C8CCM7; R4JAP5; D5FPF1; Q6J6U9; A0A2R4Q9T7; V9P6P6; C6K8R8; V9P769; Q8W3W8; B5A816; R9XUW0; R4JB62; D5FPF3; A0A0U3AGE0; B5A813; F1C940; Q8W3X4; A2IBJ9; R9YSZ0; F8SGQ2; A0A2R4Q9U1; Q9XGF0; A7XDG0; Q84U16; A7X9Y0; D5FPF4; A0A2R4Q9S5; F5A7G6; F8SGP8; Q68VI0; Q0Q2J1; Q8W3X0; X2J…	0	1621.83	14	H	H	H	H	H	H	H	2.91	2	811.419	-0.97	23.216
	H	SQQQQPVIPQQPSFSQQQLPPF		11	91	8	D3UAL8; R9XVA5; D5FPE3; A2IBV5; R4JDM1; Q8W3X4; Q9XGF0; A7XDG0; Q0Q2J1; Q8W3X0; B2Y2R6	2	2537.28	22	H	NF	NF	H	H	NF	H	1.27	2	1269.14	-0.84	30.7325
	H	SQQQQPVLL		10	31	53	D3UAL8; B8Y444; A2IBV5; Q8W3W8; Q8W3X4; Q9XGF0; Q84U16; B9VSH9; Q8W3X0; B2Y2R6	1	1040.57	9	H	H	H	H	H	H	H	2.11	2	520.791	0.4	17.0267
	H	SQQQQPVLPQQPSF		12	97	58	D3UAL8; R9XVA5; D5FPE3; C8CCM7; A2IBV5; R4JDM1; Q8W3X4; Q9XGF0; A7XDG0; Q0Q2J1; Q8W3X0; B2Y2R6	1	1611.81	14	H	H	H	H	H	H	H	3.4	2	806.409	-0.6	20.9087
	H	SQQQQPVLPQQPSFSQQQLPPFSQQQQPPF		7	32	5	D3UAL8; R9XVA5; A2IBV5; Q8W3X4; Q9XGF0; Q8W3X0; B2Y2R6	4	3477.72	30	H	NF	NF	H	H	NF	H	1.59	3	1159.91	0.07	31.9154
	H	TSLAL		50	1284	464	D0F0C5; K7WV80; N1R0S5; K7WV72; A0A0A9RWM6; D0ES12; M7Z8V3; G9AYK6; A0A368QQ96; A0A2P1BXV0; Q670S2; I1ILT7; A0A0Q3GGG2; Q6J6V0; R4JFH5; A0A287GA23; R4JAP5; J3M5K7; Q6J6U9; A0A2R4Q9T7; M8AHS2; A0A0E0MHA4; D3U329; A0A1E5W740; F2DFY3; B5A816; Q84NE4; A0A0D9ZSX2; M0Y530; A0A0E0JEE4; A0A2R4Q9T1; A0A0D9UX31; R4JB62; A0A0E0L7K0; A0A0E0PGE1; R4JD66; A0A1Z5R643; A0A0E0JER3; A0A2R4Q9U1; A0A2R4Q9S8; Q9XGF0;…	1	504.303	5	H	H	H	H	H	H	H	1.74	1	504.303	-0.29	13.2342
	H	VHPSIL		36	208	822	I3XHQ0; D3UAL8; H9XGZ9; R9XVA5; A2IBJ7; D5FPE3; D0F0C4; C8CCM7; P06471; A2IBV5; Q0PIV6; A0A287EIZ3; Q8W3W8; R4JDM1; K0I5W1; Q40026; A0A0U3AGE0; A0A0U3AIG6; Q8W3X4; D5FPE9; Q9XGF0; A0A287EFG2; A7XDG0; I6TMW4; I6SJ22; A0A0U2JFU1; A8IEC6; A0A287EFF7; A0A0K2GRQ1; I6SW30; Q0Q2J1; Q8W3X0; A0A287EIW5; B2Y2R6; A8IEB4; A0A0U3ATU4	0	665.398	6	H	H	H	H	H	H	H	1.62	1	665.397	-0.94	7.2207
	H	VHPSILQQLNPCKVF	1xCarbamidomethyl [C12]	24	149	92	D3UAL8; R9XVA5; D5FPE3; C8CCM7; P06471; Q0PIV6; A0A287EIZ3; Q8W3W8; R4JDM1; K0I5W1; Q40026; A0A0U3AIG6; Q8W3X4; D5FPE9; Q9XGF0; A0A287EFG2; A7XDG0; I6TMW4; I6SJ22; I6SW30; Q0Q2J1; Q8W3X0; A0A287EIW5; B2Y2R6	2	1779.96	15	H	H	H	H	H	H	H	4.28	3	593.991	0.51	24.9486
	H	YRTTTRVPF		10	44	134	D3UAL8; D5FPE3; A2IBV5; Q8W3W8; Q8W3X4; Q9XGF0; A7XDG0; Q0Q2J1; Q8W3X0; B2Y2R6	2	1140.62	9	H	H	H	H	H	H	H	2.34	3	380.877	-0.39	6.8361
TRUE	Master Protein	R4JB62	Low-molecular-weight glutenin subunit OS=Triticum aestivum OX=4565 GN=LMW-GS PE=4 SV=1	92.2601	54	2190	4	1	323	36.9	8.13	H	H	H	H	H	H	H	1787.76	54
	Confidence	Sequence	Modifications	# Protein Groups	# Proteins	# PSMs	Master Protein Accessions	# Missed Cleavages	Theo. MH+ [Da]	Sequence Length	Found in Sample Group: 1_AG38Duetto	Found in Sample Group: 5_AG167PI	Found in Sample Group: S_Semola	Found in Sample Group: 4_AG77Neolatino	Found in Sample Group: 3_AG69Lloyd	Found in Sample Group: SI_SemolaIntegrale	Found in Sample Group: 2_AG33Colosseo	XCorr Sequest HT	Charge Sequest HT	m/z [Da] Sequest HT	DeltaM [ppm] Sequest HT	RT [min] Sequest HT
	H	ARSQML		49	270	7	D0F0C5; J9QEK9; D0ES12; B2LWZ2; G0YLZ2; G9AYK6; A0A2P1BXV0; B5A810; C8CCM7; Q6J6V0; R4JFH5; A0A346R8U1; R4JAP5; A9YWM3; D3U329; P93794; J9QFV1; C6K8R8; A0A287EIZ3; F5A7G7; B5A816; Q84NE4; A0A2R4Q9T1; A0A346R8U2; F6KHQ0; R4JB62; D0ES19; B5A813; F1C940; A0A0U3AIG6; Q5XXZ9; D5FPE9; Q9XGF0; A8CA05; Q3YB17; B2LWZ6; A0A346R8T9; Q84U16; T1LG74; A0A346R8T7; A0A2R4Q9V4; A0A346R8T6; A0A089VKK4; Q2L990; A0A…	0	705.371	6	H	NF	H	H	H	H	H	1.23	1	705.37	-1.74	3.2777
	H	CSVNVPVY	1xCarbamidomethyl [C1]	22	93	3	A2IBK1; Q8W3X5; A0A2P1BXV0; Q6J6V0; A0A0U3ANN8; A0A346R8U1; R4JAP5; A9YWM3; D3U329; F8SGM9; A0A2R4Q9T1; R4JB62; D5FPF3; A0A0U3AIG6; C8CCM8; A2IBJ9; D5FPE9; A8CA05; F8SGM7; D5FPF4; Q68VI0; F8SGN9	3	937.445	8	NF	NF	H	NF	H	NF	H	1.18	1	937.444	-0.8	16.9848
	H	DAIRAIIY		25	101	217	A2IBK1; Q8W3X5; A0A2P1BXV0; Q6J6V0; A0A0U3ANN8; R4JAP5; A9YWM3; D5FPF1; D3U329; V9P785; F8SGM9; A0A2R4Q9T1; R4JB62; D5FPF3; A0A0U3AIG6; Q41552; C8CCM8; A2IBJ9; D5FPE9; A8CA05; F8SGM7; D5FPF4; Q68VI0; F8SGN9; B8Y0L6	0	934.536	8	H	H	H	H	H	H	H	2.32	2	467.772	0.44	19.2101
	H	GQWPQQQQVPQGTL		22	88	15	A2IBK1; Q8W3X5; A0A2P1BXV0; Q6J6V0; A0A0U3ANN8; R4JAP5; A9YWM3; D3U329; V9P785; F8SGM9; A0A2R4Q9T1; R4JB62; D5FPF3; A0A0U3AIG6; C8CCM8; A2IBJ9; A8CA05; F8SGM7; D5FPF4; Q68VI0; F8SGN9; B8Y0L6	1	1594.8	14	H	H	H	H	H	H	H	2.49	2	797.901	-1.57	19.641
	H	GQWPQQQQVPQGTLLQPHQIAQL		20	86	3	A2IBK1; Q8W3X5; A0A2P1BXV0; Q6J6V0; A0A0U3ANN8; R4JAP5; A9YWM3; D3U329; V9P785; F8SGM9; A0A2R4Q9T1; R4JB62; D5FPF3; A0A0U3AIG6; C8CCM8; A2IBJ9; A8CA05; D5FPF4; Q68VI0; F8SGN9	3	2623.37	23	NF	NF	NF	H	H	NF	NF	1.39	3	875.128	-1.24	25.9172
	H	GTTTIVPF		12	67	14	Q8W3X5; A0A2P1BXV0; A0A0U3ANN8; F8SGM9; R4JB62; C8CCM8; A2IBJ9; A8CA05; F8SGM7; D5FPF4; Q68VI0; F8SGN9	0	835.456	8	H	H	H	H	H	H	H	1.56	1	835.456	0.58	24.7638
	H	GVGTRVGAY		18	72	20	A2IBK1; Q8W3X5; A0A2P1BXV0; A0A0U3ANN8; R4JAP5; A9YWM3; D5FPF1; D3U329; F8SGM9; R4JB62; D5FPF3; C8CCM8; A2IBJ9; A8CA05; F8SGM7; D5FPF4; F8SGN9; B8Y0L6	0	879.468	9	H	H	H	H	H	H	H	1.63	2	440.237	-1.23	3.9266
	H	LPQQPPFSQQQPPF		11	66	12	Q8W3X5; A0A2P1BXV0; A0A0U3ANN8; A9YWM3; V9P785; F8SGM9; R4JB62; A0A0U3AIG6; F8SGM7; D5FPF4; B8Y0L6	2	1638.83	14	NF	NF	H	H	H	H	H	2.28	2	819.917	-0.39	25.3965
	H	LQPHQLAQL		53	256	324	D0F0C5; K7WV80; A9YRN9; C6K8R4; A0A287EFH8; D0ES12; B2LWZ2; G0YLZ2; G9AYK6; A0A2P1BXV0; Q670S2; B5A810; C8CCM7; Q6J6V0; R4JAP5; A9YWM3; D3U329; P93794; J9QFV1; C6K8R8; A0A287EIZ3; F5A7G7; B5A816; Q84NE4; A0A2R4Q9T1; A0A346R8U2; F6KHQ0; Q40026; R4JB62; Q84U17; B5A813; F1C940; A0A0U3AIG6; Q5XXZ9; C8CCM8; D5FPE9; Q9XGF0; A0A287EFG2; A8CA05; Q3YB17; B2LWZ6; A0A346R8T9; Q84U16; A0A346R8T7; A0A2R4Q9V4;…	2	1047.59	9	H	H	H	H	H	H	H	2.76	2	524.301	1.03	10.8766
	H	LQQQCSPVAMPQSL	1xCarbamidomethyl [C5]	33	198	8	R9XVA5; A2IBK1; Q8W3X5; A0A2P1BXV0; D5FPE3; C8CCM7; Q6J6V0; A2IBV5; A9YWM3; D5FPF1; D3U329; V9P785; F8SGM9; Q8W3W8; R4JDM1; A0A2R4Q9T1; K0I5W1; R4JB62; D5FPF3; A0A0U3AGE0; Q41552; Q8W3X4; C8CCM8; A2IBJ9; A8CA05; F8SGM7; D5FPF4; Q68VI0; F8SGN9; Q8W3X0; B2Y2R6; B8Y0L6; A0A0U3ATU4	1	1586.77	14	NF	NF	H	H	H	H	H	1.9	2	793.886	-1	21.583
	H	METSHIPSLEKPL		1	7	65	R4JB62	1	1481.77	13	H	H	H	H	H	H	H	3.13	2	741.386	-0.87	15.5297
	H	METSHIPSLEKPLQQQPLPL		1	7	46	R4JB62	3	2286.22	20	H	NF	H	H	H	H	H	2.39	3	762.743	-0.48	23.4276
	H	METSHIPSLEKPLQQQPLPLQQILW		1	7	29	R4JB62	5	2954.58	25	H	NF	H	H	H	H	H	3.58	3	985.531	-1.05	33.6437
	H	NQPQQQQPQQSVQGVSQPQQQQKQL		20	82	21	A2IBK1; Q8W3X5; A0A2P1BXV0; Q6J6V0; A0A0U3ANN8; R4JAP5; A9YWM3; D5FPF1; D3U329; V9P785; F8SGM9; A0A2R4Q9T1; R4JB62; Q41552; C8CCM8; A2IBJ9; A8CA05; F8SGM7; F8SGN9; B8Y0L6	0	2887.44	25	H	H	H	H	H	H	H	2.26	3	963.15	-1.6	7.5568
	H	PQQPPFSQQQQPILPQQPPF	2xDeamidated [Q]	5	38	37	C8CCM7; R4JB62; A7X9Y0; D5FPF4; A0A0U3ATU4	2	2332.16	20	NF	H	H	NF	H	H	NF	1.65	3	778.06	1.51	20.0232
	H	QPHQLAQL		53	256	14	D0F0C5; K7WV80; A9YRN9; C6K8R4; A0A287EFH8; D0ES12; B2LWZ2; G0YLZ2; G9AYK6; A0A2P1BXV0; Q670S2; B5A810; C8CCM7; Q6J6V0; R4JAP5; A9YWM3; D3U329; P93794; J9QFV1; C6K8R8; A0A287EIZ3; F5A7G7; B5A816; Q84NE4; A0A2R4Q9T1; A0A346R8U2; F6KHQ0; Q40026; R4JB62; Q84U17; B5A813; F1C940; A0A0U3AIG6; Q5XXZ9; C8CCM8; D5FPE9; Q9XGF0; A0A287EFG2; A8CA05; Q3YB17; B2LWZ6; A0A346R8T9; Q84U16; A0A346R8T7; A0A2R4Q9V4;…	1	934.51	8	H	NF	H	H	H	H	H	1.53	2	467.759	0.32	5.8896
	H	QQLNPCKVF	1xCarbamidomethyl [C6]	46	251	287	D0F0C5; K7WV80; N1R0S5; K7WV72; G0YLZ2; G9AYK6; A0A2P1BXV0; I3QPG3; A0A346R8U0; Q6J6V0; R4JFH5; A0A346R8U1; R4JAP5; Q6J6U9; A0A2R4Q9T7; D3U329; R4JFK3; P93794; C6K8R8; A0A287EIZ3; B5A816; Q84NE4; I3QPH1; A0A2R4Q9T1; A0A346R8U2; Q40026; R4JB62; A0A0U3AIG6; D7RFI1; R4JD66; A0A2R4Q9U1; A0A2R4Q9S8; Q9XGF0; A8CA05; Q3YB17; B2LWZ6; A0A346R8T7; A0A2R4Q9V4; A0A346R8T6; A0A089VKK4; A8IEC6; A0A2R4Q9S5; B2L…	1	1133.58	9	H	H	H	H	H	H	H	2.56	2	567.292	0.33	14.0594
	H	QQLNPCKVF	1xGln->pyro-Glu [N-Term]; 1xCarbamidomethyl [C6]	46	250	108	D0F0C5; K7WV80; N1R0S5; K7WV72; G0YLZ2; G9AYK6; A0A2P1BXV0; I3QPG3; A0A346R8U0; Q6J6V0; R4JFH5; A0A346R8U1; R4JAP5; Q6J6U9; A0A2R4Q9T7; D3U329; R4JFK3; P93794; C6K8R8; A0A287EIZ3; B5A816; Q84NE4; I3QPH1; A0A2R4Q9T1; A0A346R8U2; Q40026; R4JB62; A0A0U3AIG6; D7RFI1; R4JD66; A0A2R4Q9U1; A0A2R4Q9S8; Q9XGF0; A8CA05; Q3YB17; B2LWZ6; A0A346R8T7; A0A2R4Q9V4; A0A346R8T6; A0A089VKK4; A8IEC6; A0A2R4Q9S5; B2L…	1	1116.55	9	H	H	H	H	H	H	H	1.47	1	1116.55	0.02	23.8566
	H	QQPQQQQL		26	108	96	G0YLZ2; A2IBK1; Q8W3X5; A0A2P1BXV0; A0A0U3ANN8; Q5XXZ7; R4JAP5; A9YWM3; D5FPF1; V9P785; F8SGM9; R4JB62; D5FPF3; A0A0U3AGE0; A0A0U3AIG6; C8CCM8; A2IBJ9; D5FPE9; A8CA05; F8SGM7; D4HNA5; D5FPF4; F5A7G6; Q68VI0; F8SGN9; B8Y0L6	0	997.506	8	H	H	H	H	H	H	H	2.65	1	997.505	-0.95	3.8091
	H	QQPQQQQL	1xGln->pyro-Glu [N-Term]	25	103	5	G0YLZ2; A2IBK1; Q8W3X5; A0A2P1BXV0; A0A0U3ANN8; Q5XXZ7; R4JAP5; A9YWM3; D5FPF1; V9P785; F8SGM9; R4JB62; D5FPF3; A0A0U3AIG6; C8CCM8; A2IBJ9; D5FPE9; A8CA05; F8SGM7; D4HNA5; D5FPF4; F5A7G6; Q68VI0; F8SGN9; B8Y0L6	0	980.48	8	NF	NF	NF	NF	H	H	H	1.55	2	490.743	-0.23	11.7416
	H	QQQPIPL		17	76	166	A2IBK1; Q8W3X5; A0A2P1BXV0; A0A0U3ANN8; A9YWM3; V9P785; F8SGM9; R4JB62; C8CCM8; A2IBJ9; A8CA05; F8SGM7; A7X9Y0; D5FPF4; Q68VI0; F8SGN9; B8Y0L6	0	823.467	7	H	H	H	H	H	H	H	1.76	1	823.466	-0.9	16.4551
	H	QQQPLPL	1xGln->pyro-Glu [N-Term]	17	76	42	A2IBK1; Q8W3X5; A0A2P1BXV0; A0A0U3ANN8; A9YWM3; V9P785; F8SGM9; R4JB62; C8CCM8; A2IBJ9; A8CA05; F8SGM7; A7X9Y0; D5FPF4; Q68VI0; F8SGN9; B8Y0L6	1	806.441	7	H	NF	H	H	H	H	H	1.05	1	806.44	-0.23	27.8002
	H	QQQPLPLQQILW		17	74	22	A2IBK1; Q8W3X5; A0A2P1BXV0; A0A0U3ANN8; A9YWM3; V9P785; F8SGM9; R4JB62; C8CCM8; A2IBJ9; A8CA05; F8SGM7; A7X9Y0; D5FPF4; Q68VI0; F8SGN9; B8Y0L6	3	1491.83	12	NF	NF	H	H	H	H	H	2.41	2	746.419	-0.73	38.6784
	H	RTLPTM		48	251	45	D0F0C5; N1R0S5; K7WV72; J9QEK9; A9YRN9; C6K8R4; G0YLZ2; A0A2P1BXV0; W8E197; W8E194; I3QPG3; W8E1A2; B5A810; C8CCM7; R4JFH5; Q5XXZ7; R4JAP5; A9YWM3; Q6J6U9; A0A2R4Q9T7; J9QFV1; W8E6H6; H8Y0M0; B5A816; W8E2L7; F6KHQ0; R4JB62; W8E6G7; B5A813; K7XED4; D7RFI1; C8CCM8; W8E0F4; A0A2R4Q9U1; A0A2R4Q9S8; W8E5R1; Q9XGF0; A8CA05; Q84U16; Q6B780; A0A346R8T7; A8IEC6; A0A0K2GRQ1; A0A2R4Q9S5; B6UKQ7; X2JC88; A8I…	1	718.392	6	H	H	H	H	H	H	H	1.27	1	718.39	-2.41	5.4248
	H	RTLPTMCSVNVPVY	1xCarbamidomethyl [C7]	16	71	34	A2IBK1; Q8W3X5; A0A2P1BXV0; A0A0U3ANN8; R4JAP5; A9YWM3; F8SGM9; R4JB62; D5FPF3; C8CCM8; A2IBJ9; A8CA05; F8SGM7; D5FPF4; Q68VI0; F8SGN9	1	1636.82	14	H	H	H	H	H	H	H	2.98	2	818.912	-0.76	21.4662
	H	RTLPTMCSVNVPVY	1xOxidation [M6]; 1xCarbamidomethyl [C7]	16	71	9	A2IBK1; Q8W3X5; A0A2P1BXV0; A0A0U3ANN8; R4JAP5; A9YWM3; F8SGM9; R4JB62; D5FPF3; C8CCM8; A2IBJ9; A8CA05; F8SGM7; D5FPF4; Q68VI0; F8SGN9	1	1652.81	14	H	NF	NF	H	H	NF	H	2.36	2	826.909	-1.08	16.5473
	H	RTLPTMCSVNVPVYGTTTIVPF	1xCarbamidomethyl [C7]	12	65	51	Q8W3X5; A0A2P1BXV0; A0A0U3ANN8; F8SGM9; R4JB62; C8CCM8; A2IBJ9; A8CA05; F8SGM7; D5FPF4; Q68VI0; F8SGN9	2	2453.26	22	H	H	H	H	H	H	H	3.94	2	1227.13	-0.53	32.7605
	H	SIVLQEQQHGQGL		13	73	76	A2IBK1; Q8W3X5; A0A2P1BXV0; A0A0U3ANN8; A9YWM3; V9P785; F8SGM9; R4JB62; C8CCM8; A2IBJ9; A8CA05; F8SGM7; D5FPF4	1	1436.75	13	H	H	H	H	H	H	H	3.2	2	718.878	0.24	12.2673
	H	SIVLQEQQHGQGLNQPQQQQPQQSVQGVSQPQQQQKQL	1xDeamidated [Q]	12	60	7	A2IBK1; Q8W3X5; A0A2P1BXV0; A0A0U3ANN8; A9YWM3; V9P785; F8SGM9; R4JB62; C8CCM8; A2IBJ9; A8CA05; F8SGM7	2	4306.16	38	NF	NF	NF	NF	NF	H	NF	1.02	3	1436.06	-0.21	13.363
	H	SLVL		26	516	93	M8BRJ1; R7WGI5; A0A368PZQ7; R4JAP5; M8BZJ6; K3Z358; K3XEU7; A0A0Q3IJN8; A0A0Q3KLB4; M8B8R6; R4JB62; W5CVZ8; M7ZU95; Q10MA5; N1QPZ3; A0A2K2DNT7; I1IUS5; K3ZQG2; M8CJ64; M8D3W9; M8CQ11; K3XFT2; A0A077RVQ0; Q10PY7; M8APT8; A0A0Q3HS50	1	431.286	4	H	H	H	H	H	H	H	1.36	1	431.286	-0.15	14.8277
	H	SQHQQPVLPQQQIPSVQPSIL		12	68	55	A2IBK1; Q8W3X5; A0A2P1BXV0; V9P785; F8SGM9; R4JB62; A2IBJ9; A8CA05; F8SGM7; D5FPF4; F8SGN9; B8Y0L6	1	2352.27	21	H	H	H	H	H	H	H	4.59	2	1176.64	-0.05	23.8399
	H	SQQQPPF		36	253	26	K7WV80; A0A3G3C4J5; K7WV72; B8XU59; P93792; Q8W3X5; A0A2P1BXV0; Q8W3V8; C8CCM7; Q6J6V0; R4JAP5; A9YWM3; D2DII6; D3U329; R4JFK3; R4JDM1; Q5MFK8; I3QPH1; A0A2R4Q9T1; A0A346R8U2; R4JB62; F1C940; A0A0U3AIG6; Q41552; K7XED4; D7RFI1; C8CCM8; F8SGM2; R4JD66; D5FPE9; A8CA05; A0A346R8T9; Q6B780; A0A2R4Q9V4; B2LX00; C6KI73	0	831.4	7	H	H	H	H	H	H	H	1.48	1	831.399	-1.26	10.1053
	H	SQQQQPLLPQQPPF		6	50	12	C8CCM7; V9P785; R4JB62; A7X9Y0; D5FPF4; A0A0U3ATU4	2	1635.85	14	NF	NF	NF	H	H	NF	H	1.67	2	818.428	-0.68	24.9156
	H	SQQQQPVIPQQPPF		51	229	62	D0F0C5; N1R0S5; C6K8R4; D3UAL8; D0ES12; G0YLZ2; R9XVA5; A2IBK1; Q8W3X5; A0A2P1BXV0; B5TWK5; I3QPG3; Q84U12; D5FPE3; B5A810; C8CCM7; R4JAP5; D5FPF1; Q6J6U9; A0A2R4Q9T7; V9P6P6; C6K8R8; V9P769; Q8W3W8; B5A816; R9XUW0; R4JB62; D5FPF3; A0A0U3AGE0; B5A813; F1C940; Q8W3X4; A2IBJ9; R9YSZ0; F8SGQ2; A0A2R4Q9U1; Q9XGF0; A7XDG0; Q84U16; A7X9Y0; D5FPF4; A0A2R4Q9S5; F5A7G6; F8SGP8; Q68VI0; Q0Q2J1; Q8W3X0; X2J…	0	1621.83	14	H	H	H	H	H	H	H	2.91	2	811.419	-0.97	23.216
	H	TSLAL		50	1284	464	D0F0C5; K7WV80; N1R0S5; K7WV72; A0A0A9RWM6; D0ES12; M7Z8V3; G9AYK6; A0A368QQ96; A0A2P1BXV0; Q670S2; I1ILT7; A0A0Q3GGG2; Q6J6V0; R4JFH5; A0A287GA23; R4JAP5; J3M5K7; Q6J6U9; A0A2R4Q9T7; M8AHS2; A0A0E0MHA4; D3U329; A0A1E5W740; F2DFY3; B5A816; Q84NE4; A0A0D9ZSX2; M0Y530; A0A0E0JEE4; A0A2R4Q9T1; A0A0D9UX31; R4JB62; A0A0E0L7K0; A0A0E0PGE1; R4JD66; A0A1Z5R643; A0A0E0JER3; A0A2R4Q9U1; A0A2R4Q9S8; Q9XGF0;…	1	504.303	5	H	H	H	H	H	H	H	1.74	1	504.303	-0.29	13.2342
	H	YQQQQPIQQQPQPF		13	65	7	A2IBK1; Q8W3X5; A0A2P1BXV0; V9P785; F8SGM9; R4JB62; A2IBJ9; A8CA05; F8SGM7; A7X9Y0; Q68VI0; F8SGN9; B8Y0L6	1	1757.86	14	NF	NF	H	H	H	NF	H	1.72	2	879.434	-0.44	16.7584
TRUE	Master Protein	B2Y2R6	Low molecular weight glutenin subunit OS=Triticum aestivum OX=4565 GN=GluB3-6 PE=4 SV=1	78.0612	52	2420	2	1	392	44.5	8.34	H	H	H	H	H	H	H	1719.75	52
	Confidence	Sequence	Modifications	# Protein Groups	# Proteins	# PSMs	Master Protein Accessions	# Missed Cleavages	Theo. MH+ [Da]	Sequence Length	Found in Sample Group: 1_AG38Duetto	Found in Sample Group: 5_AG167PI	Found in Sample Group: S_Semola	Found in Sample Group: 4_AG77Neolatino	Found in Sample Group: 3_AG69Lloyd	Found in Sample Group: SI_SemolaIntegrale	Found in Sample Group: 2_AG33Colosseo	XCorr Sequest HT	Charge Sequest HT	m/z [Da] Sequest HT	DeltaM [ppm] Sequest HT	RT [min] Sequest HT
	H	EAIRAIVY		16	69	218	D3UAL8; B2LWZ2; B5A810; A2IBV5; Q6J6U9; Q8W3W8; Q8W3X4; Q9XGF0; A7XDG0; F6M7E1; B2LWZ6; A0A346R8T9; A0A346R8T6; Q0Q2J1; Q8W3X0; B2Y2R6	0	934.536	8	H	H	H	H	H	H	H	2.52	2	467.771	-0.08	13.5366
	H	GVGTGVGGY		5	36	167	A2IBV5; Q8W3X4; A0A068F8R5; Q8W3X0; B2Y2R6	0	766.373	9	H	H	H	H	H	H	H	3.01	1	766.372	-0.73	9.7258
	H	LQQQCSPVAMPQSL	1xCarbamidomethyl [C5]	33	198	8	R9XVA5; A2IBK1; Q8W3X5; A0A2P1BXV0; D5FPE3; C8CCM7; Q6J6V0; A2IBV5; A9YWM3; D5FPF1; D3U329; V9P785; F8SGM9; Q8W3W8; R4JDM1; A0A2R4Q9T1; K0I5W1; R4JB62; D5FPF3; A0A0U3AGE0; Q41552; Q8W3X4; C8CCM8; A2IBJ9; A8CA05; F8SGM7; D5FPF4; Q68VI0; F8SGN9; Q8W3X0; B2Y2R6; B8Y0L6; A0A0U3ATU4	1	1586.77	14	NF	NF	H	H	H	H	H	1.9	2	793.886	-1	21.583
	H	PPFSQQLPPFSQQQQPVLPQQPPF	2xDeamidated [Q12; Q13]	7	31	5	D3UAL8; R9XVA5; D5FPE3; Q8W3X4; A7XDG0; Q8W3X0; B2Y2R6	4	2762.38	24	NF	NF	NF	H	H	NF	H	1.37	3	921.466	0.9	27.5927
	H	PPFSQQQQPPFSQQQQPVLPQQPSFSQQQL		8	32	15	D3UAL8; R9XVA5; D5FPE3; A2IBV5; Q8W3X4; Q9XGF0; Q8W3X0; B2Y2R6	4	3477.72	30	H	H	NF	H	H	H	H	1.66	3	1159.91	0.07	28.8574
	H	PPFSQQQQPPFSQQQQPVLPQQPSFSQQQLPPF	2xDeamidated [Q]	8	32	14	D3UAL8; R9XVA5; D5FPE3; A2IBV5; Q8W3X4; Q9XGF0; Q8W3X0; B2Y2R6	5	3820.86	33	H	NF	NF	H	H	NF	NF	1.91	3	1274.3	2.62	28.2599
	H	PPFSQQQQPVLPQQPPFSQQQLPPFSQQL	1xDeamidated [Q]	3	22	22	R9XVA5; Q8W3X4; B2Y2R6	5	3345.69	29	H	NF	NF	H	H	NF	NF	1.73	3	1115.91	6.58	35.0974
	H	PPFSQQQQPVLPQQPPFSQQQLPPFSQQL		3	22	50	R9XVA5; Q8W3X4; B2Y2R6	5	3344.71	29	H	NF	H	H	H	H	H	2.37	3	1115.57	0.89	34.8118
	H	PQQPPFSQQQLPPF		5	25	5	R9XVA5; A2IBV5; Q8W3X4; Q0Q2J1; B2Y2R6	2	1638.83	14	H	NF	NF	H	H	H	NF	1.03	2	819.917	-0.02	25.2491
	H	QMENSHIPGLERPSQQQPLPPQQTL	1xGln->pyro-Glu [N-Term]; 1xDeamidated [N/Q]	10	46	29	R9XVA5; D5FPE3; A2IBV5; Q8W3W8; K0I5W1; Q8W3X4; A7XDG0; Q0Q2J1; Q8W3X0; B2Y2R6	4	2837.39	25	H	NF	H	NF	H	H	NF	1.95	3	946.469	0.94	24.0259
	H	QQQIPF	1xGln->pyro-Glu [N-Term]	20	115	122	A0A1D6PVA1; D3UAL8; A0A1D6PVM1; Q670S2; Q84U12; D5FPE3; A2IBV5; D5FPF1; A0A024A3B7; A0A3L6F0A4; Q8W3W8; Q5XXZ9; Q8W3X4; Q9XGF0; A7XDG0; B6SII5; Q0Q2J1; Q8W3X0; B2Y2R6; A0A0U3ATU4	0	743.372	6	H	H	H	H	H	H	H	1.23	1	743.372	-1	29.9125
	H	QQQLPF		20	115	466	A0A1D6PVA1; D3UAL8; A0A1D6PVM1; Q670S2; Q84U12; D5FPE3; A2IBV5; D5FPF1; A0A024A3B7; A0A3L6F0A4; Q8W3W8; Q5XXZ9; Q8W3X4; Q9XGF0; A7XDG0; B6SII5; Q0Q2J1; Q8W3X0; B2Y2R6; A0A0U3ATU4	1	760.399	6	H	H	H	H	H	H	H	1.53	1	760.399	0.15	17.7289
	H	RTLPTMCNVNVPL	1xCarbamidomethyl [C7]	14	67	116	D0F0C5; A0A0K2GSM3; D5FPE3; R4JFH5; C6KI71; Q8W3W8; Q8W3X4; Q4G3S5; A7XDG0; A0A287EFF7; Q0Q2J1; Q8W3X0; B2Y2R6; J9QGY8	1	1514.78	13	H	NF	H	H	H	H	H	3.7	2	757.894	-0.4	21.5241
	H	RTLPTMCNVNVPL	1xOxidation [M6]; 1xCarbamidomethyl [C7]	14	67	20	D0F0C5; A0A0K2GSM3; D5FPE3; R4JFH5; C6KI71; Q8W3W8; Q8W3X4; Q4G3S5; A7XDG0; A0A287EFF7; Q0Q2J1; Q8W3X0; B2Y2R6; J9QGY8	1	1530.78	13	H	NF	NF	H	H	H	H	2.69	2	765.891	-0.9	15.9942
	H	RTLPTMCNVNVPLY	1xCarbamidomethyl [C7]	13	66	83	D0F0C5; A0A0K2GSM3; D5FPE3; R4JFH5; C6KI71; Q8W3W8; Q8W3X4; Q4G3S5; A7XDG0; Q0Q2J1; Q8W3X0; B2Y2R6; J9QGY8	2	1677.85	14	H	NF	H	H	H	H	H	3.08	2	839.426	-0.56	23.1963
	H	RTLPTMCNVNVPLY	1xOxidation [M6]; 1xCarbamidomethyl [C7]	13	66	7	D0F0C5; A0A0K2GSM3; D5FPE3; R4JFH5; C6KI71; Q8W3W8; Q8W3X4; Q4G3S5; A7XDG0; Q0Q2J1; Q8W3X0; B2Y2R6; J9QGY8	2	1693.84	14	H	NF	NF	H	H	NF	H	1.82	2	847.423	-1.01	18.2575
	H	RTTTRVPF		10	44	59	D3UAL8; D5FPE3; A2IBV5; Q8W3W8; Q8W3X4; Q9XGF0; A7XDG0; Q0Q2J1; Q8W3X0; B2Y2R6	0	977.553	8	H	H	H	H	H	H	H	1.53	2	489.28	-0.34	3.8425
	H	SIILQEQQQVQGSIQTQQQQPQQL	1xDeamidated [Q]	11	56	20	D5FPE3; A2IBV5; Q8W3W8; A0A0U3AGE0; Q8W3X4; Q9XGF0; A7XDG0; Q0Q2J1; Q8W3X0; B2Y2R6; A0A0U3ATU4	1	2779.42	24	H	NF	H	NF	NF	NF	NF	1.27	3	927.151	6.02	23.8626
	H	SIILQEQQQVQGSIQTQQQQPQQL		11	56	84	D5FPE3; A2IBV5; Q8W3W8; A0A0U3AGE0; Q8W3X4; Q9XGF0; A7XDG0; Q0Q2J1; Q8W3X0; B2Y2R6; A0A0U3ATU4	1	2778.44	24	H	H	H	H	H	H	H	5.08	2	1389.72	0.61	24.0527
	H	SQQLPPFSQQQQPVLPQQPPF		8	32	23	D3UAL8; R9XVA5; D5FPE3; Q8W3X4; Q9XGF0; A7XDG0; Q8W3X0; B2Y2R6	3	2419.24	21	H	NF	H	H	H	H	H	1.79	2	1210.12	0.12	30.5488
	H	SQQQLPPF		14	97	16	D3UAL8; R9XVA5; D5FPE3; A2IBV5; R4JDM1; K0I5W1; A0A0U3AGE0; Q8W3X4; Q9XGF0; A7XDG0; Q0Q2J1; Q8W3X0; B2Y2R6; A0A0U3ATU4	1	944.484	8	H	NF	H	H	H	H	H	1.3	1	944.482	-1.97	19.3503
	H	SQQQLPPFSQQLPPF		10	36	54	D3UAL8; R9XVA5; D5FPE3; A2IBV5; Q8W3X4; Q9XGF0; A7XDG0; Q0Q2J1; Q8W3X0; B2Y2R6	3	1741.89	15	H	NF	H	H	H	H	H	1.95	2	871.45	1.33	32.9225
	H	SQQQLPPFSQQLPPFSQQQQPVLPQQPPF		7	31	6	D3UAL8; R9XVA5; D5FPE3; Q8W3X4; A7XDG0; Q8W3X0; B2Y2R6	5	3344.71	29	H	NF	H	H	H	H	NF	1.37	3	1115.57	0.34	36.7654
	H	SQQQLPPFSQQQQPPF		8	33	34	D3UAL8; R9XVA5; D5FPE3; A2IBV5; Q8W3X4; Q9XGF0; Q8W3X0; B2Y2R6	2	1884.92	16	H	H	H	H	H	H	H	1.97	2	942.964	-1.17	25.5109
	H	SQQQLPPFSQQQQPPFSQQQQPVLPQQPSF	1xDeamidated [Q]	8	32	4	D3UAL8; R9XVA5; D5FPE3; A2IBV5; Q8W3X4; Q9XGF0; Q8W3X0; B2Y2R6	4	3478.7	30	NF	NF	NF	NF	NF	H	NF	1.58	3	1160.25	5.33	30.7475
	H	SQQQLPPFSQQQQPPFSQQQQPVLPQQPSF		8	32	25	D3UAL8; R9XVA5; D5FPE3; A2IBV5; Q8W3X4; Q9XGF0; Q8W3X0; B2Y2R6	4	3477.72	30	H	NF	H	H	H	NF	H	2.49	3	1159.91	-0.56	30.8261
	H	SQQQQPPFSQQQQPPF		49	266	54	A0A165R8I1; D3UAL8; B2LWZ2; R9XVA5; A0A0A0R2J7; G9AYK6; X2J8E3; F1C945; R9XV91; Q5MFH0; D5FPE3; B5A810; Q38L54; R4JFH5; A2IBV5; R9XUD0; P93794; A0A0A0R2I8; A0A1U9XLA9; C6KI71; Q8W3W8; Q84NE4; F1C943; A0A1G4P206; Q2PQJ6; X2JAE7; D0ES19; A0A024A269; Q8W3X4; D0ES20; D0ES16; R4JB44; Q9XGF0; A7XDG0; B2LWZ6; Q84U16; Q6QGW0; A0A068F8R5; T1LG74; A0A346R8T6; A0A089VKK4; A0A0A0QYP7; K7R468; B8XU51; V9P6N2;…	1	1899.9	16	H	H	H	H	H	H	H	4	2	950.452	-0.53	20.9553
	H	SQQQQPPFSQQQQPVLPQQPSF		10	38	48	D3UAL8; R9XVA5; D5FPE3; A2IBV5; Q8W3X4; Q9XGF0; A7XDG0; Q0Q2J1; Q8W3X0; B2Y2R6	2	2552.25	22	H	H	H	H	H	H	H	3.55	2	1276.63	0.92	25.5605
	H	SQQQQPPFSQQQQPVLPQQPSFSQQQLPPF		10	37	15	D3UAL8; R9XVA5; D5FPE3; A2IBV5; Q8W3X4; Q9XGF0; A7XDG0; Q0Q2J1; Q8W3X0; B2Y2R6	4	3477.72	30	H	NF	H	H	H	NF	H	1.85	3	1159.91	0.7	32.445
	H	SQQQQPVIPQQPPF		51	229	62	D0F0C5; N1R0S5; C6K8R4; D3UAL8; D0ES12; G0YLZ2; R9XVA5; A2IBK1; Q8W3X5; A0A2P1BXV0; B5TWK5; I3QPG3; Q84U12; D5FPE3; B5A810; C8CCM7; R4JAP5; D5FPF1; Q6J6U9; A0A2R4Q9T7; V9P6P6; C6K8R8; V9P769; Q8W3W8; B5A816; R9XUW0; R4JB62; D5FPF3; A0A0U3AGE0; B5A813; F1C940; Q8W3X4; A2IBJ9; R9YSZ0; F8SGQ2; A0A2R4Q9U1; Q9XGF0; A7XDG0; Q84U16; A7X9Y0; D5FPF4; A0A2R4Q9S5; F5A7G6; F8SGP8; Q68VI0; Q0Q2J1; Q8W3X0; X2J…	0	1621.83	14	H	H	H	H	H	H	H	2.91	2	811.419	-0.97	23.216
	H	SQQQQPVIPQQPSFSQQQLPPF		11	91	8	D3UAL8; R9XVA5; D5FPE3; A2IBV5; R4JDM1; Q8W3X4; Q9XGF0; A7XDG0; Q0Q2J1; Q8W3X0; B2Y2R6	2	2537.28	22	H	NF	NF	H	H	NF	H	1.27	2	1269.14	-0.84	30.7325
	H	SQQQQPVLL		10	31	53	D3UAL8; B8Y444; A2IBV5; Q8W3W8; Q8W3X4; Q9XGF0; Q84U16; B9VSH9; Q8W3X0; B2Y2R6	1	1040.57	9	H	H	H	H	H	H	H	2.11	2	520.791	0.4	17.0267
	H	SQQQQPVLPQQPPFSQQQLPPF	1xDeamidated [Q]	4	23	8	R9XVA5; Q8W3X4; Q0Q2J1; B2Y2R6	3	2548.28	22	NF	NF	NF	H	H	NF	NF	1.08	2	1274.66	9.08	31.8783
	H	SQQQQPVLPQQPSF		12	97	58	D3UAL8; R9XVA5; D5FPE3; C8CCM7; A2IBV5; R4JDM1; Q8W3X4; Q9XGF0; A7XDG0; Q0Q2J1; Q8W3X0; B2Y2R6	1	1611.81	14	H	H	H	H	H	H	H	3.4	2	806.409	-0.6	20.9087
	H	SQQQQPVLPQQPSFSQQQLPPFSQQQQPPF		7	32	5	D3UAL8; R9XVA5; A2IBV5; Q8W3X4; Q9XGF0; Q8W3X0; B2Y2R6	4	3477.72	30	H	NF	NF	H	H	NF	H	1.59	3	1159.91	0.07	31.9154
	H	SQQQQQPILPQQPPFSQQQQPVLL		2	11	52	D3UAL8; B2Y2R6	3	2785.46	24	H	H	H	H	H	H	H	3.14	2	1393.24	1.59	31.3798
	H	SQQQQQPLL		12	67	4	D3UAL8; A0A2P1BXV0; R4JAP5; V9P785; F8SGM9; R4JDM1; D5FPF3; A0A0U3AIG6; D5FPE9; F8SGM7; B2LWZ6; B2Y2R6	1	1069.56	9	NF	NF	NF	H	NF	NF	H	1.12	2	535.286	0.68	11.0239
	H	SQQQQQPLLPQQPPF		8	43	16	D3UAL8; A0A2P1BXV0; R4JAP5; F8SGM9; D5FPF3; D5FPE9; F8SGM7; B2Y2R6	2	1763.91	15	H	NF	NF	H	H	NF	H	1.92	2	882.457	-0.55	24.8687
	H	VHPSIL		36	208	822	I3XHQ0; D3UAL8; H9XGZ9; R9XVA5; A2IBJ7; D5FPE3; D0F0C4; C8CCM7; P06471; A2IBV5; Q0PIV6; A0A287EIZ3; Q8W3W8; R4JDM1; K0I5W1; Q40026; A0A0U3AGE0; A0A0U3AIG6; Q8W3X4; D5FPE9; Q9XGF0; A0A287EFG2; A7XDG0; I6TMW4; I6SJ22; A0A0U2JFU1; A8IEC6; A0A287EFF7; A0A0K2GRQ1; I6SW30; Q0Q2J1; Q8W3X0; A0A287EIW5; B2Y2R6; A8IEB4; A0A0U3ATU4	0	665.398	6	H	H	H	H	H	H	H	1.62	1	665.397	-0.94	7.2207
	H	VHPSILQQLNPCKVF	1xCarbamidomethyl [C12]	24	149	92	D3UAL8; R9XVA5; D5FPE3; C8CCM7; P06471; Q0PIV6; A0A287EIZ3; Q8W3W8; R4JDM1; K0I5W1; Q40026; A0A0U3AIG6; Q8W3X4; D5FPE9; Q9XGF0; A0A287EFG2; A7XDG0; I6TMW4; I6SJ22; I6SW30; Q0Q2J1; Q8W3X0; A0A287EIW5; B2Y2R6	2	1779.96	15	H	H	H	H	H	H	H	4.28	3	593.991	0.51	24.9486
	H	YRTTTRVPF		10	44	134	D3UAL8; D5FPE3; A2IBV5; Q8W3W8; Q8W3X4; Q9XGF0; A7XDG0; Q0Q2J1; Q8W3X0; B2Y2R6	2	1140.62	9	H	H	H	H	H	H	H	2.34	3	380.877	-0.39	6.8361
TRUE	Master Protein	Q8W3X0	Low-molecular-weight glutenin subunit group 3 type II (Fragment) OS=Triticum aestivum OX=4565 GN=lmw-gs PE=4 SV=1	76.3848	43	2265	1	1	343	38.8	8.16	H	H	H	H	H	H	H	1657.19	43
	Confidence	Sequence	Modifications	# Protein Groups	# Proteins	# PSMs	Master Protein Accessions	# Missed Cleavages	Theo. MH+ [Da]	Sequence Length	Found in Sample Group: 1_AG38Duetto	Found in Sample Group: 5_AG167PI	Found in Sample Group: S_Semola	Found in Sample Group: 4_AG77Neolatino	Found in Sample Group: 3_AG69Lloyd	Found in Sample Group: SI_SemolaIntegrale	Found in Sample Group: 2_AG33Colosseo	XCorr Sequest HT	Charge Sequest HT	m/z [Da] Sequest HT	DeltaM [ppm] Sequest HT	RT [min] Sequest HT
	H	EAIRAIVY		16	69	218	D3UAL8; B2LWZ2; B5A810; A2IBV5; Q6J6U9; Q8W3W8; Q8W3X4; Q9XGF0; A7XDG0; F6M7E1; B2LWZ6; A0A346R8T9; A0A346R8T6; Q0Q2J1; Q8W3X0; B2Y2R6	0	934.536	8	H	H	H	H	H	H	H	2.52	2	467.771	-0.08	13.5366
	H	GQCVSQPQQQSQQQL	1xCarbamidomethyl [C3]	29	250	20	Q5PU42; D0F0C5; K7WV80; A0A3G3C4J5; Q1ZZT4; A0A165R8I1; C8CCM2; D0ES12; R9XVA5; H6VLQ1; C8CCM7; R4JFH5; A2IBV5; Q0PW08; Q8W3W8; R4JDM1; Q5MFK8; K0I5W1; A0A0U3AGE0; F1C940; H6VLQ3; Q9XGF0; Q3YB17; Q3YB18; Q5MFH4; T1LG74; A0A346R8T7; A0A2R4Q9V4; Q8W3X0	0	1743.81	15	H	NF	H	H	H	H	H	2.8	2	872.408	0.44	5.8298
	H	GVGTGVGGY		5	36	167	A2IBV5; Q8W3X4; A0A068F8R5; Q8W3X0; B2Y2R6	0	766.373	9	H	H	H	H	H	H	H	3.01	1	766.372	-0.73	9.7258
	H	LQQQCSPVAMPQSL	1xCarbamidomethyl [C5]	33	198	8	R9XVA5; A2IBK1; Q8W3X5; A0A2P1BXV0; D5FPE3; C8CCM7; Q6J6V0; A2IBV5; A9YWM3; D5FPF1; D3U329; V9P785; F8SGM9; Q8W3W8; R4JDM1; A0A2R4Q9T1; K0I5W1; R4JB62; D5FPF3; A0A0U3AGE0; Q41552; Q8W3X4; C8CCM8; A2IBJ9; A8CA05; F8SGM7; D5FPF4; Q68VI0; F8SGN9; Q8W3X0; B2Y2R6; B8Y0L6; A0A0U3ATU4	1	1586.77	14	NF	NF	H	H	H	H	H	1.9	2	793.886	-1	21.583
	H	PPFSQQLPPFSQQQQPVLPQQPPF	2xDeamidated [Q12; Q13]	7	31	5	D3UAL8; R9XVA5; D5FPE3; Q8W3X4; A7XDG0; Q8W3X0; B2Y2R6	4	2762.38	24	NF	NF	NF	H	H	NF	H	1.37	3	921.466	0.9	27.5927
	H	PPFSQQQQPPFSQQQQPVLPQQPSFSQQQL		8	32	15	D3UAL8; R9XVA5; D5FPE3; A2IBV5; Q8W3X4; Q9XGF0; Q8W3X0; B2Y2R6	4	3477.72	30	H	H	NF	H	H	H	H	1.66	3	1159.91	0.07	28.8574
	H	PPFSQQQQPPFSQQQQPVLPQQPSFSQQQLPPF	2xDeamidated [Q]	8	32	14	D3UAL8; R9XVA5; D5FPE3; A2IBV5; Q8W3X4; Q9XGF0; Q8W3X0; B2Y2R6	5	3820.86	33	H	NF	NF	H	H	NF	NF	1.91	3	1274.3	2.62	28.2599
	H	PPFSQQQQPVLPQQPPFSQQQQPVLLQQQIPF	4xDeamidated [Q]	1	1	12	Q8W3X0	5	3729.88	32	NF	NF	NF	H	NF	NF	H	1.26	3	1243.97	1.59	33.7999
	H	PPFSQQQQPVLPQQPPFSQQQQPVLLQQQIPF	3xDeamidated [Q]	1	1	7	Q8W3X0	5	3728.9	32	H	NF	NF	NF	NF	NF	NF	1.67	3	1243.63	-6.46	33.6781
	H	QMENSHIPGLERPSQQQPLPPQQTL	1xGln->pyro-Glu [N-Term]; 1xDeamidated [N/Q]	10	46	29	R9XVA5; D5FPE3; A2IBV5; Q8W3W8; K0I5W1; Q8W3X4; A7XDG0; Q0Q2J1; Q8W3X0; B2Y2R6	4	2837.39	25	H	NF	H	NF	H	H	NF	1.95	3	946.469	0.94	24.0259
	H	QQQIPF	1xGln->pyro-Glu [N-Term]	20	115	122	A0A1D6PVA1; D3UAL8; A0A1D6PVM1; Q670S2; Q84U12; D5FPE3; A2IBV5; D5FPF1; A0A024A3B7; A0A3L6F0A4; Q8W3W8; Q5XXZ9; Q8W3X4; Q9XGF0; A7XDG0; B6SII5; Q0Q2J1; Q8W3X0; B2Y2R6; A0A0U3ATU4	0	743.372	6	H	H	H	H	H	H	H	1.23	1	743.372	-1	29.9125
	H	QQQLPF		20	115	466	A0A1D6PVA1; D3UAL8; A0A1D6PVM1; Q670S2; Q84U12; D5FPE3; A2IBV5; D5FPF1; A0A024A3B7; A0A3L6F0A4; Q8W3W8; Q5XXZ9; Q8W3X4; Q9XGF0; A7XDG0; B6SII5; Q0Q2J1; Q8W3X0; B2Y2R6; A0A0U3ATU4	1	760.399	6	H	H	H	H	H	H	H	1.53	1	760.399	0.15	17.7289
	H	RTLPTMCNVNVPL	1xCarbamidomethyl [C7]	14	67	116	D0F0C5; A0A0K2GSM3; D5FPE3; R4JFH5; C6KI71; Q8W3W8; Q8W3X4; Q4G3S5; A7XDG0; A0A287EFF7; Q0Q2J1; Q8W3X0; B2Y2R6; J9QGY8	1	1514.78	13	H	NF	H	H	H	H	H	3.7	2	757.894	-0.4	21.5241
	H	RTLPTMCNVNVPL	1xOxidation [M6]; 1xCarbamidomethyl [C7]	14	67	20	D0F0C5; A0A0K2GSM3; D5FPE3; R4JFH5; C6KI71; Q8W3W8; Q8W3X4; Q4G3S5; A7XDG0; A0A287EFF7; Q0Q2J1; Q8W3X0; B2Y2R6; J9QGY8	1	1530.78	13	H	NF	NF	H	H	H	H	2.69	2	765.891	-0.9	15.9942
	H	RTLPTMCNVNVPLY	1xCarbamidomethyl [C7]	13	66	83	D0F0C5; A0A0K2GSM3; D5FPE3; R4JFH5; C6KI71; Q8W3W8; Q8W3X4; Q4G3S5; A7XDG0; Q0Q2J1; Q8W3X0; B2Y2R6; J9QGY8	2	1677.85	14	H	NF	H	H	H	H	H	3.08	2	839.426	-0.56	23.1963
	H	RTLPTMCNVNVPLY	1xOxidation [M6]; 1xCarbamidomethyl [C7]	13	66	7	D0F0C5; A0A0K2GSM3; D5FPE3; R4JFH5; C6KI71; Q8W3W8; Q8W3X4; Q4G3S5; A7XDG0; Q0Q2J1; Q8W3X0; B2Y2R6; J9QGY8	2	1693.84	14	H	NF	NF	H	H	NF	H	1.82	2	847.423	-1.01	18.2575
	H	RTTTRVPF		10	44	59	D3UAL8; D5FPE3; A2IBV5; Q8W3W8; Q8W3X4; Q9XGF0; A7XDG0; Q0Q2J1; Q8W3X0; B2Y2R6	0	977.553	8	H	H	H	H	H	H	H	1.53	2	489.28	-0.34	3.8425
	H	SIILQEQQQVQGSIQTQQQQPQQL	1xDeamidated [Q]	11	56	20	D5FPE3; A2IBV5; Q8W3W8; A0A0U3AGE0; Q8W3X4; Q9XGF0; A7XDG0; Q0Q2J1; Q8W3X0; B2Y2R6; A0A0U3ATU4	1	2779.42	24	H	NF	H	NF	NF	NF	NF	1.27	3	927.151	6.02	23.8626
	H	SIILQEQQQVQGSIQTQQQQPQQL		11	56	84	D5FPE3; A2IBV5; Q8W3W8; A0A0U3AGE0; Q8W3X4; Q9XGF0; A7XDG0; Q0Q2J1; Q8W3X0; B2Y2R6; A0A0U3ATU4	1	2778.44	24	H	H	H	H	H	H	H	5.08	2	1389.72	0.61	24.0527
	H	SQQLPPFSQQQQPVLPQQPPF		8	32	23	D3UAL8; R9XVA5; D5FPE3; Q8W3X4; Q9XGF0; A7XDG0; Q8W3X0; B2Y2R6	3	2419.24	21	H	NF	H	H	H	H	H	1.79	2	1210.12	0.12	30.5488
	H	SQQQLPPF		14	97	16	D3UAL8; R9XVA5; D5FPE3; A2IBV5; R4JDM1; K0I5W1; A0A0U3AGE0; Q8W3X4; Q9XGF0; A7XDG0; Q0Q2J1; Q8W3X0; B2Y2R6; A0A0U3ATU4	1	944.484	8	H	NF	H	H	H	H	H	1.3	1	944.482	-1.97	19.3503
	H	SQQQLPPFSQQLPPF		10	36	54	D3UAL8; R9XVA5; D5FPE3; A2IBV5; Q8W3X4; Q9XGF0; A7XDG0; Q0Q2J1; Q8W3X0; B2Y2R6	3	1741.89	15	H	NF	H	H	H	H	H	1.95	2	871.45	1.33	32.9225
	H	SQQQLPPFSQQLPPFSQQQQPVLPQQPPF		7	31	6	D3UAL8; R9XVA5; D5FPE3; Q8W3X4; A7XDG0; Q8W3X0; B2Y2R6	5	3344.71	29	H	NF	H	H	H	H	NF	1.37	3	1115.57	0.34	36.7654
	H	SQQQLPPFSQQQQPPF		8	33	34	D3UAL8; R9XVA5; D5FPE3; A2IBV5; Q8W3X4; Q9XGF0; Q8W3X0; B2Y2R6	2	1884.92	16	H	H	H	H	H	H	H	1.97	2	942.964	-1.17	25.5109
	H	SQQQLPPFSQQQQPPFSQQQQPVLPQQPSF	1xDeamidated [Q]	8	32	4	D3UAL8; R9XVA5; D5FPE3; A2IBV5; Q8W3X4; Q9XGF0; Q8W3X0; B2Y2R6	4	3478.7	30	NF	NF	NF	NF	NF	H	NF	1.58	3	1160.25	5.33	30.7475
	H	SQQQLPPFSQQQQPPFSQQQQPVLPQQPSF		8	32	25	D3UAL8; R9XVA5; D5FPE3; A2IBV5; Q8W3X4; Q9XGF0; Q8W3X0; B2Y2R6	4	3477.72	30	H	NF	H	H	H	NF	H	2.49	3	1159.91	-0.56	30.8261
	H	SQQQQPPFSQQQQPPF		49	266	54	A0A165R8I1; D3UAL8; B2LWZ2; R9XVA5; A0A0A0R2J7; G9AYK6; X2J8E3; F1C945; R9XV91; Q5MFH0; D5FPE3; B5A810; Q38L54; R4JFH5; A2IBV5; R9XUD0; P93794; A0A0A0R2I8; A0A1U9XLA9; C6KI71; Q8W3W8; Q84NE4; F1C943; A0A1G4P206; Q2PQJ6; X2JAE7; D0ES19; A0A024A269; Q8W3X4; D0ES20; D0ES16; R4JB44; Q9XGF0; A7XDG0; B2LWZ6; Q84U16; Q6QGW0; A0A068F8R5; T1LG74; A0A346R8T6; A0A089VKK4; A0A0A0QYP7; K7R468; B8XU51; V9P6N2;…	1	1899.9	16	H	H	H	H	H	H	H	4	2	950.452	-0.53	20.9553
	H	SQQQQPPFSQQQQPVLPQQPSF		10	38	48	D3UAL8; R9XVA5; D5FPE3; A2IBV5; Q8W3X4; Q9XGF0; A7XDG0; Q0Q2J1; Q8W3X0; B2Y2R6	2	2552.25	22	H	H	H	H	H	H	H	3.55	2	1276.63	0.92	25.5605
	H	SQQQQPPFSQQQQPVLPQQPSFSQQQLPPF		10	37	15	D3UAL8; R9XVA5; D5FPE3; A2IBV5; Q8W3X4; Q9XGF0; A7XDG0; Q0Q2J1; Q8W3X0; B2Y2R6	4	3477.72	30	H	NF	H	H	H	NF	H	1.85	3	1159.91	0.7	32.445
	H	SQQQQPVIPQQPPF		51	229	62	D0F0C5; N1R0S5; C6K8R4; D3UAL8; D0ES12; G0YLZ2; R9XVA5; A2IBK1; Q8W3X5; A0A2P1BXV0; B5TWK5; I3QPG3; Q84U12; D5FPE3; B5A810; C8CCM7; R4JAP5; D5FPF1; Q6J6U9; A0A2R4Q9T7; V9P6P6; C6K8R8; V9P769; Q8W3W8; B5A816; R9XUW0; R4JB62; D5FPF3; A0A0U3AGE0; B5A813; F1C940; Q8W3X4; A2IBJ9; R9YSZ0; F8SGQ2; A0A2R4Q9U1; Q9XGF0; A7XDG0; Q84U16; A7X9Y0; D5FPF4; A0A2R4Q9S5; F5A7G6; F8SGP8; Q68VI0; Q0Q2J1; Q8W3X0; X2J…	0	1621.83	14	H	H	H	H	H	H	H	2.91	2	811.419	-0.97	23.216
	H	SQQQQPVIPQQPSFSQQQLPPF		11	91	8	D3UAL8; R9XVA5; D5FPE3; A2IBV5; R4JDM1; Q8W3X4; Q9XGF0; A7XDG0; Q0Q2J1; Q8W3X0; B2Y2R6	2	2537.28	22	H	NF	NF	H	H	NF	H	1.27	2	1269.14	-0.84	30.7325
	H	SQQQQPVLL		10	31	53	D3UAL8; B8Y444; A2IBV5; Q8W3W8; Q8W3X4; Q9XGF0; Q84U16; B9VSH9; Q8W3X0; B2Y2R6	1	1040.57	9	H	H	H	H	H	H	H	2.11	2	520.791	0.4	17.0267
	H	SQQQQPVLPQQPSF		12	97	58	D3UAL8; R9XVA5; D5FPE3; C8CCM7; A2IBV5; R4JDM1; Q8W3X4; Q9XGF0; A7XDG0; Q0Q2J1; Q8W3X0; B2Y2R6	1	1611.81	14	H	H	H	H	H	H	H	3.4	2	806.409	-0.6	20.9087
	H	SQQQQPVLPQQPSFSQQQLPPFSQQQQPPF		7	32	5	D3UAL8; R9XVA5; A2IBV5; Q8W3X4; Q9XGF0; Q8W3X0; B2Y2R6	4	3477.72	30	H	NF	NF	H	H	NF	H	1.59	3	1159.91	0.07	31.9154
	H	VHPSIL		36	208	822	I3XHQ0; D3UAL8; H9XGZ9; R9XVA5; A2IBJ7; D5FPE3; D0F0C4; C8CCM7; P06471; A2IBV5; Q0PIV6; A0A287EIZ3; Q8W3W8; R4JDM1; K0I5W1; Q40026; A0A0U3AGE0; A0A0U3AIG6; Q8W3X4; D5FPE9; Q9XGF0; A0A287EFG2; A7XDG0; I6TMW4; I6SJ22; A0A0U2JFU1; A8IEC6; A0A287EFF7; A0A0K2GRQ1; I6SW30; Q0Q2J1; Q8W3X0; A0A287EIW5; B2Y2R6; A8IEB4; A0A0U3ATU4	0	665.398	6	H	H	H	H	H	H	H	1.62	1	665.397	-0.94	7.2207
	H	VHPSILQQLNPCKVF	1xCarbamidomethyl [C12]	24	149	92	D3UAL8; R9XVA5; D5FPE3; C8CCM7; P06471; Q0PIV6; A0A287EIZ3; Q8W3W8; R4JDM1; K0I5W1; Q40026; A0A0U3AIG6; Q8W3X4; D5FPE9; Q9XGF0; A0A287EFG2; A7XDG0; I6TMW4; I6SJ22; I6SW30; Q0Q2J1; Q8W3X0; A0A287EIW5; B2Y2R6	2	1779.96	15	H	H	H	H	H	H	H	4.28	3	593.991	0.51	24.9486
	H	YRTTTRVPF		10	44	134	D3UAL8; D5FPE3; A2IBV5; Q8W3W8; Q8W3X4; Q9XGF0; A7XDG0; Q0Q2J1; Q8W3X0; B2Y2R6	2	1140.62	9	H	H	H	H	H	H	H	2.34	3	380.877	-0.39	6.8361
TRUE	Master Protein	Q8W3X4	Low-molecular-weight glutenin subunit group 3 type II (Fragment) OS=Triticum aestivum OX=4565 GN=lmw-gs PE=4 SV=1	68.5567	46	2283	1	1	388	44	8.35	H	H	H	H	H	H	H	1622.36	46
	Confidence	Sequence	Modifications	# Protein Groups	# Proteins	# PSMs	Master Protein Accessions	# Missed Cleavages	Theo. MH+ [Da]	Sequence Length	Found in Sample Group: 1_AG38Duetto	Found in Sample Group: 5_AG167PI	Found in Sample Group: S_Semola	Found in Sample Group: 4_AG77Neolatino	Found in Sample Group: 3_AG69Lloyd	Found in Sample Group: SI_SemolaIntegrale	Found in Sample Group: 2_AG33Colosseo	XCorr Sequest HT	Charge Sequest HT	m/z [Da] Sequest HT	DeltaM [ppm] Sequest HT	RT [min] Sequest HT
	H	EAIRAIVY		16	69	218	D3UAL8; B2LWZ2; B5A810; A2IBV5; Q6J6U9; Q8W3W8; Q8W3X4; Q9XGF0; A7XDG0; F6M7E1; B2LWZ6; A0A346R8T9; A0A346R8T6; Q0Q2J1; Q8W3X0; B2Y2R6	0	934.536	8	H	H	H	H	H	H	H	2.52	2	467.771	-0.08	13.5366
	H	GVGTGVGGY		5	36	167	A2IBV5; Q8W3X4; A0A068F8R5; Q8W3X0; B2Y2R6	0	766.373	9	H	H	H	H	H	H	H	3.01	1	766.372	-0.73	9.7258
	H	LQQQCSPVAMPQSL	1xCarbamidomethyl [C5]	33	198	8	R9XVA5; A2IBK1; Q8W3X5; A0A2P1BXV0; D5FPE3; C8CCM7; Q6J6V0; A2IBV5; A9YWM3; D5FPF1; D3U329; V9P785; F8SGM9; Q8W3W8; R4JDM1; A0A2R4Q9T1; K0I5W1; R4JB62; D5FPF3; A0A0U3AGE0; Q41552; Q8W3X4; C8CCM8; A2IBJ9; A8CA05; F8SGM7; D5FPF4; Q68VI0; F8SGN9; Q8W3X0; B2Y2R6; B8Y0L6; A0A0U3ATU4	1	1586.77	14	NF	NF	H	H	H	H	H	1.9	2	793.886	-1	21.583
	H	PPFSQQLPPFSQQQQPVLPQQPPF	2xDeamidated [Q12; Q13]	7	31	5	D3UAL8; R9XVA5; D5FPE3; Q8W3X4; A7XDG0; Q8W3X0; B2Y2R6	4	2762.38	24	NF	NF	NF	H	H	NF	H	1.37	3	921.466	0.9	27.5927
	H	PPFSQQQQPPFSQQQQPVLPQQPSFSQQQL		8	32	15	D3UAL8; R9XVA5; D5FPE3; A2IBV5; Q8W3X4; Q9XGF0; Q8W3X0; B2Y2R6	4	3477.72	30	H	H	NF	H	H	H	H	1.66	3	1159.91	0.07	28.8574
	H	PPFSQQQQPPFSQQQQPVLPQQPSFSQQQLPPF	2xDeamidated [Q]	8	32	14	D3UAL8; R9XVA5; D5FPE3; A2IBV5; Q8W3X4; Q9XGF0; Q8W3X0; B2Y2R6	5	3820.86	33	H	NF	NF	H	H	NF	NF	1.91	3	1274.3	2.62	28.2599
	H	PPFSQQQQPVLPQQPPFSQQQLPPFSQQL	1xDeamidated [Q]	3	22	22	R9XVA5; Q8W3X4; B2Y2R6	5	3345.69	29	H	NF	NF	H	H	NF	NF	1.73	3	1115.91	6.58	35.0974
	H	PPFSQQQQPVLPQQPPFSQQQLPPFSQQL		3	22	50	R9XVA5; Q8W3X4; B2Y2R6	5	3344.71	29	H	NF	H	H	H	H	H	2.37	3	1115.57	0.89	34.8118
	H	PQQPPFSQQQLPPF		5	25	5	R9XVA5; A2IBV5; Q8W3X4; Q0Q2J1; B2Y2R6	2	1638.83	14	H	NF	NF	H	H	H	NF	1.03	2	819.917	-0.02	25.2491
	H	QMENSHIPGLERPSQQQPLPPQQTL	1xGln->pyro-Glu [N-Term]; 1xDeamidated [N/Q]	10	46	29	R9XVA5; D5FPE3; A2IBV5; Q8W3W8; K0I5W1; Q8W3X4; A7XDG0; Q0Q2J1; Q8W3X0; B2Y2R6	4	2837.39	25	H	NF	H	NF	H	H	NF	1.95	3	946.469	0.94	24.0259
	H	QQQIPF	1xGln->pyro-Glu [N-Term]	20	115	122	A0A1D6PVA1; D3UAL8; A0A1D6PVM1; Q670S2; Q84U12; D5FPE3; A2IBV5; D5FPF1; A0A024A3B7; A0A3L6F0A4; Q8W3W8; Q5XXZ9; Q8W3X4; Q9XGF0; A7XDG0; B6SII5; Q0Q2J1; Q8W3X0; B2Y2R6; A0A0U3ATU4	0	743.372	6	H	H	H	H	H	H	H	1.23	1	743.372	-1	29.9125
	H	QQQLPF		20	115	466	A0A1D6PVA1; D3UAL8; A0A1D6PVM1; Q670S2; Q84U12; D5FPE3; A2IBV5; D5FPF1; A0A024A3B7; A0A3L6F0A4; Q8W3W8; Q5XXZ9; Q8W3X4; Q9XGF0; A7XDG0; B6SII5; Q0Q2J1; Q8W3X0; B2Y2R6; A0A0U3ATU4	1	760.399	6	H	H	H	H	H	H	H	1.53	1	760.399	0.15	17.7289
	H	RTLPTMCNVNVPL	1xCarbamidomethyl [C7]	14	67	116	D0F0C5; A0A0K2GSM3; D5FPE3; R4JFH5; C6KI71; Q8W3W8; Q8W3X4; Q4G3S5; A7XDG0; A0A287EFF7; Q0Q2J1; Q8W3X0; B2Y2R6; J9QGY8	1	1514.78	13	H	NF	H	H	H	H	H	3.7	2	757.894	-0.4	21.5241
	H	RTLPTMCNVNVPL	1xOxidation [M6]; 1xCarbamidomethyl [C7]	14	67	20	D0F0C5; A0A0K2GSM3; D5FPE3; R4JFH5; C6KI71; Q8W3W8; Q8W3X4; Q4G3S5; A7XDG0; A0A287EFF7; Q0Q2J1; Q8W3X0; B2Y2R6; J9QGY8	1	1530.78	13	H	NF	NF	H	H	H	H	2.69	2	765.891	-0.9	15.9942
	H	RTLPTMCNVNVPLY	1xCarbamidomethyl [C7]	13	66	83	D0F0C5; A0A0K2GSM3; D5FPE3; R4JFH5; C6KI71; Q8W3W8; Q8W3X4; Q4G3S5; A7XDG0; Q0Q2J1; Q8W3X0; B2Y2R6; J9QGY8	2	1677.85	14	H	NF	H	H	H	H	H	3.08	2	839.426	-0.56	23.1963
	H	RTLPTMCNVNVPLY	1xOxidation [M6]; 1xCarbamidomethyl [C7]	13	66	7	D0F0C5; A0A0K2GSM3; D5FPE3; R4JFH5; C6KI71; Q8W3W8; Q8W3X4; Q4G3S5; A7XDG0; Q0Q2J1; Q8W3X0; B2Y2R6; J9QGY8	2	1693.84	14	H	NF	NF	H	H	NF	H	1.82	2	847.423	-1.01	18.2575
	H	RTTTRVPF		10	44	59	D3UAL8; D5FPE3; A2IBV5; Q8W3W8; Q8W3X4; Q9XGF0; A7XDG0; Q0Q2J1; Q8W3X0; B2Y2R6	0	977.553	8	H	H	H	H	H	H	H	1.53	2	489.28	-0.34	3.8425
	H	SIILQEQQQVQGSIQTQQQQPQQL	1xDeamidated [Q]	11	56	20	D5FPE3; A2IBV5; Q8W3W8; A0A0U3AGE0; Q8W3X4; Q9XGF0; A7XDG0; Q0Q2J1; Q8W3X0; B2Y2R6; A0A0U3ATU4	1	2779.42	24	H	NF	H	NF	NF	NF	NF	1.27	3	927.151	6.02	23.8626
	H	SIILQEQQQVQGSIQTQQQQPQQL		11	56	84	D5FPE3; A2IBV5; Q8W3W8; A0A0U3AGE0; Q8W3X4; Q9XGF0; A7XDG0; Q0Q2J1; Q8W3X0; B2Y2R6; A0A0U3ATU4	1	2778.44	24	H	H	H	H	H	H	H	5.08	2	1389.72	0.61	24.0527
	H	SQQLPPFSQQQQPVLPQQPPF		8	32	23	D3UAL8; R9XVA5; D5FPE3; Q8W3X4; Q9XGF0; A7XDG0; Q8W3X0; B2Y2R6	3	2419.24	21	H	NF	H	H	H	H	H	1.79	2	1210.12	0.12	30.5488
	H	SQQQLPPF		14	97	16	D3UAL8; R9XVA5; D5FPE3; A2IBV5; R4JDM1; K0I5W1; A0A0U3AGE0; Q8W3X4; Q9XGF0; A7XDG0; Q0Q2J1; Q8W3X0; B2Y2R6; A0A0U3ATU4	1	944.484	8	H	NF	H	H	H	H	H	1.3	1	944.482	-1.97	19.3503
	H	SQQQLPPFSQQLPPF		10	36	54	D3UAL8; R9XVA5; D5FPE3; A2IBV5; Q8W3X4; Q9XGF0; A7XDG0; Q0Q2J1; Q8W3X0; B2Y2R6	3	1741.89	15	H	NF	H	H	H	H	H	1.95	2	871.45	1.33	32.9225
	H	SQQQLPPFSQQLPPFSQQQQPVLPQQPPF		7	31	6	D3UAL8; R9XVA5; D5FPE3; Q8W3X4; A7XDG0; Q8W3X0; B2Y2R6	5	3344.71	29	H	NF	H	H	H	H	NF	1.37	3	1115.57	0.34	36.7654
	H	SQQQLPPFSQQQQPPF		8	33	34	D3UAL8; R9XVA5; D5FPE3; A2IBV5; Q8W3X4; Q9XGF0; Q8W3X0; B2Y2R6	2	1884.92	16	H	H	H	H	H	H	H	1.97	2	942.964	-1.17	25.5109
	H	SQQQLPPFSQQQQPPFSQQQQPVLPQQPSF	1xDeamidated [Q]	8	32	4	D3UAL8; R9XVA5; D5FPE3; A2IBV5; Q8W3X4; Q9XGF0; Q8W3X0; B2Y2R6	4	3478.7	30	NF	NF	NF	NF	NF	H	NF	1.58	3	1160.25	5.33	30.7475
	H	SQQQLPPFSQQQQPPFSQQQQPVLPQQPSF		8	32	25	D3UAL8; R9XVA5; D5FPE3; A2IBV5; Q8W3X4; Q9XGF0; Q8W3X0; B2Y2R6	4	3477.72	30	H	NF	H	H	H	NF	H	2.49	3	1159.91	-0.56	30.8261
	H	SQQQQPPFSQQQQPPF		49	266	54	A0A165R8I1; D3UAL8; B2LWZ2; R9XVA5; A0A0A0R2J7; G9AYK6; X2J8E3; F1C945; R9XV91; Q5MFH0; D5FPE3; B5A810; Q38L54; R4JFH5; A2IBV5; R9XUD0; P93794; A0A0A0R2I8; A0A1U9XLA9; C6KI71; Q8W3W8; Q84NE4; F1C943; A0A1G4P206; Q2PQJ6; X2JAE7; D0ES19; A0A024A269; Q8W3X4; D0ES20; D0ES16; R4JB44; Q9XGF0; A7XDG0; B2LWZ6; Q84U16; Q6QGW0; A0A068F8R5; T1LG74; A0A346R8T6; A0A089VKK4; A0A0A0QYP7; K7R468; B8XU51; V9P6N2;…	1	1899.9	16	H	H	H	H	H	H	H	4	2	950.452	-0.53	20.9553
	H	SQQQQPPFSQQQQPVLPQQPSF		10	38	48	D3UAL8; R9XVA5; D5FPE3; A2IBV5; Q8W3X4; Q9XGF0; A7XDG0; Q0Q2J1; Q8W3X0; B2Y2R6	2	2552.25	22	H	H	H	H	H	H	H	3.55	2	1276.63	0.92	25.5605
	H	SQQQQPPFSQQQQPVLPQQPSFSQQQLPPF		10	37	15	D3UAL8; R9XVA5; D5FPE3; A2IBV5; Q8W3X4; Q9XGF0; A7XDG0; Q0Q2J1; Q8W3X0; B2Y2R6	4	3477.72	30	H	NF	H	H	H	NF	H	1.85	3	1159.91	0.7	32.445
	H	SQQQQPVIPQQPPF		51	229	62	D0F0C5; N1R0S5; C6K8R4; D3UAL8; D0ES12; G0YLZ2; R9XVA5; A2IBK1; Q8W3X5; A0A2P1BXV0; B5TWK5; I3QPG3; Q84U12; D5FPE3; B5A810; C8CCM7; R4JAP5; D5FPF1; Q6J6U9; A0A2R4Q9T7; V9P6P6; C6K8R8; V9P769; Q8W3W8; B5A816; R9XUW0; R4JB62; D5FPF3; A0A0U3AGE0; B5A813; F1C940; Q8W3X4; A2IBJ9; R9YSZ0; F8SGQ2; A0A2R4Q9U1; Q9XGF0; A7XDG0; Q84U16; A7X9Y0; D5FPF4; A0A2R4Q9S5; F5A7G6; F8SGP8; Q68VI0; Q0Q2J1; Q8W3X0; X2J…	0	1621.83	14	H	H	H	H	H	H	H	2.91	2	811.419	-0.97	23.216
	H	SQQQQPVIPQQPSFSQQQLPPF		11	91	8	D3UAL8; R9XVA5; D5FPE3; A2IBV5; R4JDM1; Q8W3X4; Q9XGF0; A7XDG0; Q0Q2J1; Q8W3X0; B2Y2R6	2	2537.28	22	H	NF	NF	H	H	NF	H	1.27	2	1269.14	-0.84	30.7325
	H	SQQQQPVLL		10	31	53	D3UAL8; B8Y444; A2IBV5; Q8W3W8; Q8W3X4; Q9XGF0; Q84U16; B9VSH9; Q8W3X0; B2Y2R6	1	1040.57	9	H	H	H	H	H	H	H	2.11	2	520.791	0.4	17.0267
	H	SQQQQPVLPQQPPFSQQQLPPF	1xDeamidated [Q]	4	23	8	R9XVA5; Q8W3X4; Q0Q2J1; B2Y2R6	3	2548.28	22	NF	NF	NF	H	H	NF	NF	1.08	2	1274.66	9.08	31.8783
	H	SQQQQPVLPQQPSF		12	97	58	D3UAL8; R9XVA5; D5FPE3; C8CCM7; A2IBV5; R4JDM1; Q8W3X4; Q9XGF0; A7XDG0; Q0Q2J1; Q8W3X0; B2Y2R6	1	1611.81	14	H	H	H	H	H	H	H	3.4	2	806.409	-0.6	20.9087
	H	SQQQQPVLPQQPSFSQQQLPPFSQQQQPPF		7	32	5	D3UAL8; R9XVA5; A2IBV5; Q8W3X4; Q9XGF0; Q8W3X0; B2Y2R6	4	3477.72	30	H	NF	NF	H	H	NF	H	1.59	3	1159.91	0.07	31.9154
	H	VHPSIL		36	208	822	I3XHQ0; D3UAL8; H9XGZ9; R9XVA5; A2IBJ7; D5FPE3; D0F0C4; C8CCM7; P06471; A2IBV5; Q0PIV6; A0A287EIZ3; Q8W3W8; R4JDM1; K0I5W1; Q40026; A0A0U3AGE0; A0A0U3AIG6; Q8W3X4; D5FPE9; Q9XGF0; A0A287EFG2; A7XDG0; I6TMW4; I6SJ22; A0A0U2JFU1; A8IEC6; A0A287EFF7; A0A0K2GRQ1; I6SW30; Q0Q2J1; Q8W3X0; A0A287EIW5; B2Y2R6; A8IEB4; A0A0U3ATU4	0	665.398	6	H	H	H	H	H	H	H	1.62	1	665.397	-0.94	7.2207
	H	VHPSILQQLNPCKVF	1xCarbamidomethyl [C12]	24	149	92	D3UAL8; R9XVA5; D5FPE3; C8CCM7; P06471; Q0PIV6; A0A287EIZ3; Q8W3W8; R4JDM1; K0I5W1; Q40026; A0A0U3AIG6; Q8W3X4; D5FPE9; Q9XGF0; A0A287EFG2; A7XDG0; I6TMW4; I6SJ22; I6SW30; Q0Q2J1; Q8W3X0; A0A287EIW5; B2Y2R6	2	1779.96	15	H	H	H	H	H	H	H	4.28	3	593.991	0.51	24.9486
	H	YRTTTRVPF		10	44	134	D3UAL8; D5FPE3; A2IBV5; Q8W3W8; Q8W3X4; Q9XGF0; A7XDG0; Q0Q2J1; Q8W3X0; B2Y2R6	2	1140.62	9	H	H	H	H	H	H	H	2.34	3	380.877	-0.39	6.8361
TRUE	Master Protein	G9AYK6	LMW-i glutenin subunit OS=Triticum turgidum subsp. durum OX=4567 GN=lmw-i PE=4 SV=1	87.6289	56	1845	1	1	388	44.7	8.69	H	H	H	H	H	H	H	1612.63	56
	Confidence	Sequence	Modifications	# Protein Groups	# Proteins	# PSMs	Master Protein Accessions	# Missed Cleavages	Theo. MH+ [Da]	Sequence Length	Found in Sample Group: 1_AG38Duetto	Found in Sample Group: 5_AG167PI	Found in Sample Group: S_Semola	Found in Sample Group: 4_AG77Neolatino	Found in Sample Group: 3_AG69Lloyd	Found in Sample Group: SI_SemolaIntegrale	Found in Sample Group: 2_AG33Colosseo	XCorr Sequest HT	Charge Sequest HT	m/z [Da] Sequest HT	DeltaM [ppm] Sequest HT	RT [min] Sequest HT
	H	AHGTF		21	178	41	Q38L53; G9AYK6; X2J8E3; F1C945; Q5MFH0; R9XUD0; P93794; A0A1U9XLA9; Q84NE4; F1C943; X2JAE7; A0A1D6L3W9; D0ES16; Q9XGF0; Q84U16; Q6QGW0; A0A089VKK4; Q2L990; A0A0A0QYP7; K7R468; Q38L52	0	532.251	5	H	NF	H	H	H	H	H	1.46	1	532.251	-0.49	3.0046
	H	ARSQML		49	270	7	D0F0C5; J9QEK9; D0ES12; B2LWZ2; G0YLZ2; G9AYK6; A0A2P1BXV0; B5A810; C8CCM7; Q6J6V0; R4JFH5; A0A346R8U1; R4JAP5; A9YWM3; D3U329; P93794; J9QFV1; C6K8R8; A0A287EIZ3; F5A7G7; B5A816; Q84NE4; A0A2R4Q9T1; A0A346R8U2; F6KHQ0; R4JB62; D0ES19; B5A813; F1C940; A0A0U3AIG6; Q5XXZ9; D5FPE9; Q9XGF0; A8CA05; Q3YB17; B2LWZ6; A0A346R8T9; Q84U16; T1LG74; A0A346R8T7; A0A2R4Q9V4; A0A346R8T6; A0A089VKK4; Q2L990; A0A…	0	705.371	6	H	NF	H	H	H	H	H	1.23	1	705.37	-1.74	3.2777
	H	GQCVSQPQQQL	1xCarbamidomethyl [C3]	25	134	7	Q38L53; G9AYK6; X2J8E3; F1C945; R9XV91; Q5MFH0; Q38L54; R9XUD0; P93794; A0A1U9XLA9; Q84NE4; F1C943; A0A1G4P206; Q2PQJ6; A0A346R8U2; X2JAE7; D0ES19; D0ES20; R4JB44; Q6QGW0; A2IBV2; Q2L990; K7R468; B2LX00; Q38L52	0	1272.6	11	H	NF	NF	NF	NF	H	H	1.96	2	636.803	-0.45	7.4146
	H	GQCVSQPQQQLQQQL	1xCarbamidomethyl [C3]	24	131	3	Q38L53; G9AYK6; X2J8E3; F1C945; R9XV91; Q5MFH0; Q38L54; R9XUD0; P93794; A0A1U9XLA9; Q84NE4; A0A1G4P206; Q2PQJ6; A0A346R8U2; X2JAE7; D0ES19; D0ES20; R4JB44; Q6QGW0; A2IBV2; Q2L990; K7R468; B2LX00; Q38L52	1	1769.86	15	H	NF	NF	NF	NF	NF	NF	1.69	2	885.433	-0.34	15.8372
	H	GQQPQQQQL		29	250	39	D0F0C5; K7WV80; A0A3G3C4J5; A0A165R8I1; D0ES12; R9XVA5; A0A0A0R2J7; G9AYK6; X2J8E3; R4JFH5; P93794; Q84NE4; R4JDM1; Q5MFK8; Q2PQJ6; A0A346R8U2; D0ES19; F1C940; Q9XGF0; Q3YB17; Q5MFH4; T1LG74; A0A346R8T7; A0A2R4Q9V4; A0A089VKK4; Q2L990; A0A0A0QYP7; B8XU51; B2LX00	0	1054.53	9	H	H	H	H	H	H	H	2.05	1	1054.53	-0.47	3.9132
	H	GVGTGVGA		51	250	18	Q5PU42; D0F0C5; K7WV80; A0A3G3C4J5; Q1ZZT4; A0A165R8I1; B8XU59; P93792; D0PX24; C6K8R4; D0ES12; B2LWZ2; G9AYK6; H6VLQ1; I3QPG3; Q8W3V8; B5A810; F4YT76; R4JFH5; A0A346R8U1; D2DII6; Q0PW08; F5A7G7; B5A816; I3QPG6; A0A346R8U2; Q41547; H9XH00; Q84U17; A0A0U3AGE0; B5A813; F1C940; Q5XXZ9; K7XED4; D7RFI1; F8SGM2; R4JD66; I3QPG4; Q9XGF0; Q8H0J4; Q3YB17; B2LWZ6; A0A346R8T9; K7XED9; Q6B780; T1LG74; A0A346R…	0	617.325	8	H	H	H	H	H	H	H	2.13	1	617.325	-0.69	3.6119
	H	GVGTGVGAY		51	250	8	Q5PU42; D0F0C5; K7WV80; A0A3G3C4J5; Q1ZZT4; A0A165R8I1; B8XU59; P93792; D0PX24; C6K8R4; D0ES12; B2LWZ2; G9AYK6; H6VLQ1; I3QPG3; Q8W3V8; B5A810; F4YT76; R4JFH5; A0A346R8U1; D2DII6; Q0PW08; F5A7G7; B5A816; I3QPG6; A0A346R8U2; Q41547; H9XH00; Q84U17; A0A0U3AGE0; B5A813; F1C940; Q5XXZ9; K7XED4; D7RFI1; F8SGM2; R4JD66; I3QPG4; Q9XGF0; Q8H0J4; Q3YB17; B2LWZ6; A0A346R8T9; K7XED9; Q6B780; T1LG74; A0A346R…	0	780.389	9	H	NF	H	H	H	NF	NF	1.63	1	780.388	-0.51	10.1166
	H	ISQQQQLPF		6	29	40	G9AYK6; Q5MFH0; Q84NE4; F1C943; D0ES16; Q38L52	1	1088.57	9	NF	H	H	H	H	H	NF	1.98	2	544.79	-0.07	21.3321
	H	LQPHQLAQL		53	256	324	D0F0C5; K7WV80; A9YRN9; C6K8R4; A0A287EFH8; D0ES12; B2LWZ2; G0YLZ2; G9AYK6; A0A2P1BXV0; Q670S2; B5A810; C8CCM7; Q6J6V0; R4JAP5; A9YWM3; D3U329; P93794; J9QFV1; C6K8R8; A0A287EIZ3; F5A7G7; B5A816; Q84NE4; A0A2R4Q9T1; A0A346R8U2; F6KHQ0; Q40026; R4JB62; Q84U17; B5A813; F1C940; A0A0U3AIG6; Q5XXZ9; C8CCM8; D5FPE9; Q9XGF0; A0A287EFG2; A8CA05; Q3YB17; B2LWZ6; A0A346R8T9; Q84U16; A0A346R8T7; A0A2R4Q9V4;…	2	1047.59	9	H	H	H	H	H	H	H	2.76	2	524.301	1.03	10.8766
	H	LQQQCIPVAM	1xCarbamidomethyl [C5]	28	177	32	Q38L53; I3QPH4; A0A0A0R2J7; G9AYK6; X2J8E3; F1C945; R9XV91; Q5MFH0; Q38L54; R4JFH5; R9XUD0; R9YTM4; P93794; A0A1U9XLA9; C6KI71; Q84NE4; F1C943; Q2PQJ6; X2JAE7; D0ES16; R4JB44; Q6QGW0; T1LG74; A0A346R8T7; A0A089VKK4; K7R468; V9P6N2; Q38L52	4	1187.59	10	H	H	H	H	H	H	H	2.03	2	594.299	-0.94	18.9972
	H	QISQQQQPPPF	1xGln->pyro-Glu [N-Term]	10	74	8	A0A0A0R2J7; G9AYK6; Q5MFH0; Q84NE4; F1C943; D0ES16; R4JB44; Q6QGW0; A0A068F8R5; A0A089VKK4	1	1280.63	11	NF	H	H	H	H	NF	NF	1.66	2	640.817	0.5	26.9544
	H	QPHQLAQL		53	256	14	D0F0C5; K7WV80; A9YRN9; C6K8R4; A0A287EFH8; D0ES12; B2LWZ2; G0YLZ2; G9AYK6; A0A2P1BXV0; Q670S2; B5A810; C8CCM7; Q6J6V0; R4JAP5; A9YWM3; D3U329; P93794; J9QFV1; C6K8R8; A0A287EIZ3; F5A7G7; B5A816; Q84NE4; A0A2R4Q9T1; A0A346R8U2; F6KHQ0; Q40026; R4JB62; Q84U17; B5A813; F1C940; A0A0U3AIG6; Q5XXZ9; C8CCM8; D5FPE9; Q9XGF0; A0A287EFG2; A8CA05; Q3YB17; B2LWZ6; A0A346R8T9; Q84U16; A0A346R8T7; A0A2R4Q9V4;…	1	934.51	8	H	NF	H	H	H	H	H	1.53	2	467.759	0.32	5.8896
	H	QQLNPCKVF	1xCarbamidomethyl [C6]	46	251	287	D0F0C5; K7WV80; N1R0S5; K7WV72; G0YLZ2; G9AYK6; A0A2P1BXV0; I3QPG3; A0A346R8U0; Q6J6V0; R4JFH5; A0A346R8U1; R4JAP5; Q6J6U9; A0A2R4Q9T7; D3U329; R4JFK3; P93794; C6K8R8; A0A287EIZ3; B5A816; Q84NE4; I3QPH1; A0A2R4Q9T1; A0A346R8U2; Q40026; R4JB62; A0A0U3AIG6; D7RFI1; R4JD66; A0A2R4Q9U1; A0A2R4Q9S8; Q9XGF0; A8CA05; Q3YB17; B2LWZ6; A0A346R8T7; A0A2R4Q9V4; A0A346R8T6; A0A089VKK4; A8IEC6; A0A2R4Q9S5; B2L…	1	1133.58	9	H	H	H	H	H	H	H	2.56	2	567.292	0.33	14.0594
	H	QQLNPCKVF	1xGln->pyro-Glu [N-Term]; 1xCarbamidomethyl [C6]	46	250	108	D0F0C5; K7WV80; N1R0S5; K7WV72; G0YLZ2; G9AYK6; A0A2P1BXV0; I3QPG3; A0A346R8U0; Q6J6V0; R4JFH5; A0A346R8U1; R4JAP5; Q6J6U9; A0A2R4Q9T7; D3U329; R4JFK3; P93794; C6K8R8; A0A287EIZ3; B5A816; Q84NE4; I3QPH1; A0A2R4Q9T1; A0A346R8U2; Q40026; R4JB62; A0A0U3AIG6; D7RFI1; R4JD66; A0A2R4Q9U1; A0A2R4Q9S8; Q9XGF0; A8CA05; Q3YB17; B2LWZ6; A0A346R8T7; A0A2R4Q9V4; A0A346R8T6; A0A089VKK4; A8IEC6; A0A2R4Q9S5; B2L…	1	1116.55	9	H	H	H	H	H	H	H	1.47	1	1116.55	0.02	23.8566
	H	QQQLGQQPQQQQL	1xGln->pyro-Glu [N-Term]	26	166	3	Q38L53; A0A0A0R2J7; G9AYK6; X2J8E3; F1C945; R9XV91; Q5MFH0; R9XUD0; P93794; A0A1U9XLA9; Q84NE4; A0A1G4P206; Q2PQJ6; A0A346R8U2; X2JAE7; D0ES19; D0ES20; D0ES16; R4JB44; Q6QGW0; A2IBV2; A0A089VKK4; Q2L990; A0A0A0QYP7; B2LX00; Q38L52	1	1534.76	13	H	NF	NF	NF	NF	NF	H	1.21	2	767.885	0.84	18.0764
	H	QQQLGQQPQQQQL		26	166	23	Q38L53; A0A0A0R2J7; G9AYK6; X2J8E3; F1C945; R9XV91; Q5MFH0; R9XUD0; P93794; A0A1U9XLA9; Q84NE4; A0A1G4P206; Q2PQJ6; A0A346R8U2; X2JAE7; D0ES19; D0ES20; D0ES16; R4JB44; Q6QGW0; A2IBV2; A0A089VKK4; Q2L990; A0A0A0QYP7; B2LX00; Q38L52	1	1551.79	13	H	H	H	H	H	H	H	2.97	2	776.396	-1.49	9.8089
	H	QQQPPQQLGQCVSQPQQQL	1xCarbamidomethyl [C11]	7	34	5	G9AYK6; F1C945; Q5MFH0; Q84NE4; F1C943; Q6QGW0; Q38L52	1	2220.08	19	NF	H	H	H	H	NF	NF	1.45	2	1110.54	-0.23	16.2517
	H	QQQPPQQLGQCVSQPQQQLQQQLGQQPQQQQL	1xCarbamidomethyl [C11]	6	32	27	G9AYK6; F1C945; Q5MFH0; Q84NE4; Q6QGW0; Q38L52	3	3752.85	32	NF	H	H	H	H	H	NF	4.15	3	1251.62	0.07	23.1993
	H	RTLPRMCSVNVPLYETTTSVPL	1xCarbamidomethyl [C7]	5	23	35	G9AYK6; Q84NE4; F1C943; Q6QGW0; Q38L52	3	2534.31	22	NF	H	H	H	H	H	NF	3.62	3	845.441	-0.35	24.8141
	H	RTLPRMCSVNVPLYETTTSVPL	1xOxidation [M6]; 1xCarbamidomethyl [C7]	5	23	3	G9AYK6; Q84NE4; F1C943; Q6QGW0; Q38L52	3	2550.31	22	NF	H	NF	H	NF	NF	NF	1.77	3	850.772	-1.03	24.9503
	H	SIILQQQQQQQQQQQQQQQGQSIIQY		7	30	7	G9AYK6; F1C945; Q5MFH0; Q84NE4; F1C943; Q6QGW0; K7R468	1	3155.58	26	NF	H	H	H	H	NF	NF	2.79	3	1052.53	-0.45	23.1531
	H	SQQPPISQQQQPPF		28	161	10	A0A0A0R2J7; G9AYK6; X2J8E3; F1C945; R9XV91; Q5MFH0; Q38L54; R4JFH5; R9XUD0; R9YTM4; P93794; A0A0A0R2I8; A0A1U9XLA9; C6KI71; Q84NE4; F1C943; A0A1G4P206; Q2PQJ6; X2JAE7; D0ES16; R4JB44; Q6QGW0; T1LG74; A0A089VKK4; A0A0A0QYP7; K7R468; V9P6N2; Q38L52	0	1609.8	14	H	NF	NF	H	NF	H	H	1.32	2	805.401	-0.74	17.0117
	H	SQQPPISQQQQPPFSQQQQPPFSQQQQIPVIHPSVL		17	98	20	G9AYK6; F1C945; R9XV91; Q5MFH0; Q38L54; R4JFH5; A0A1U9XLA9; Q84NE4; F1C943; A0A1G4P206; X2JAE7; D0ES16; R4JB44; Q6QGW0; A0A089VKK4; A0A0A0QYP7; K7R468	2	4105.09	36	H	H	H	H	H	H	H	3.74	3	1369.03	-0.16	28.3134
	H	SQQQQIPVIHPSVL		28	173	108	Q38L53; A0A0A0R2J7; G9AYK6; X2J8E3; F1C945; R9XV91; Q5MFH0; Q38L54; R4JFH5; R9XUD0; R9YTM4; P93794; A0A1U9XLA9; Q84NE4; F1C943; A0A1G4P206; X2JAE7; D0ES19; D0ES20; D0ES16; R4JB44; Q6QGW0; T1LG74; A0A089VKK4; Q2L990; A0A0A0QYP7; K7R468; V9P6N2	0	1573.87	14	H	H	H	H	H	H	H	3.7	2	787.438	-0.3	20.1699
	H	SQQQQPPF		42	254	83	N1R0S5; A0A165R8I1; A9YRN9; B2LWZ2; A0A0A0R2J7; G9AYK6; A0A2P1BXV0; B5A810; C8CCM7; Q6J6V0; R4JFH5; Q5XXZ7; A9YWM3; Q6J6U9; A0A2R4Q9T7; D3U329; P93794; A0A0A0R2I8; B5A816; Q84NE4; A0A2R4Q9T1; Q2PQJ6; D0ES19; B5A813; A0A0U3AIG6; C8CCM8; D5FPE9; A0A2R4Q9U1; Q9XGF0; A8CA05; B2LWZ6; A0A346R8T9; Q84U16; T1LG74; A0A346R8T7; A0A346R8T6; A0A089VKK4; Q2L990; A0A0A0QYP7; A0A2R4Q9S5; B8XU51; X2JC88	0	959.458	8	H	H	H	H	H	H	H	2.1	2	480.233	-0.32	10.2887
	H	SQQQQPPFSQQQQIPVIHPSVL		22	127	39	Q38L53; G9AYK6; F1C945; R9XV91; Q5MFH0; Q38L54; R4JFH5; A0A1U9XLA9; Q84NE4; F1C943; A0A1G4P206; X2JAE7; D0ES19; D0ES20; D0ES16; R4JB44; Q6QGW0; T1LG74; A0A089VKK4; Q2L990; A0A0A0QYP7; K7R468	1	2514.31	22	H	H	H	H	H	H	H	3.15	2	1257.66	0.06	25.1568
	H	SQQQQPPFSQQQQIPVIHPSVL	1xDeamidated [Q]	22	124	4	Q38L53; G9AYK6; F1C945; R9XV91; Q5MFH0; Q38L54; R4JFH5; A0A1U9XLA9; Q84NE4; F1C943; A0A1G4P206; X2JAE7; D0ES19; D0ES20; D0ES16; R4JB44; Q6QGW0; T1LG74; A0A089VKK4; Q2L990; A0A0A0QYP7; K7R468	1	2515.29	22	NF	NF	H	NF	NF	NF	NF	1.07	2	1258.16	9.33	25.1861
	H	SQQQQPPFSQQQQPPF		49	266	54	A0A165R8I1; D3UAL8; B2LWZ2; R9XVA5; A0A0A0R2J7; G9AYK6; X2J8E3; F1C945; R9XV91; Q5MFH0; D5FPE3; B5A810; Q38L54; R4JFH5; A2IBV5; R9XUD0; P93794; A0A0A0R2I8; A0A1U9XLA9; C6KI71; Q8W3W8; Q84NE4; F1C943; A0A1G4P206; Q2PQJ6; X2JAE7; D0ES19; A0A024A269; Q8W3X4; D0ES20; D0ES16; R4JB44; Q9XGF0; A7XDG0; B2LWZ6; Q84U16; Q6QGW0; A0A068F8R5; T1LG74; A0A346R8T6; A0A089VKK4; A0A0A0QYP7; K7R468; B8XU51; V9P6N2;…	1	1899.9	16	H	H	H	H	H	H	H	4	2	950.452	-0.53	20.9553
	H	SQQQQPPFSQQQQPPFSQQQQSPF		12	90	77	G9AYK6; Q5MFH0; Q38L54; R9XUD0; A0A0A0R2I8; A0A1G4P206; D0ES16; Q6QGW0; A0A089VKK4; B8XU51; V9P6N2; Q38L52	2	2830.32	24	H	H	H	H	H	H	H	4.23	2	1415.66	-0.35	25.1365
	H	SQQQQPPFSQQQQSPF		19	141	31	G9AYK6; X2J8E3; Q5MFH0; Q38L54; R9XUD0; A0A0A0R2I8; A0A1U9XLA9; Q84NE4; A0A1G4P206; X2JAE7; D0ES16; R4JB44; Q6QGW0; T1LG74; A0A089VKK4; A0A0A0QYP7; B8XU51; V9P6N2; Q38L52	1	1889.88	16	H	H	H	H	H	H	H	2.9	2	945.442	-1	20.0925
	H	SQQQQPPY		25	148	10	A0A0A0R2J7; G9AYK6; X2J8E3; F1C945; R9XV91; Q5MFH0; Q38L54; R9XUD0; P93794; A0A0A0R2I8; A0A1U9XLA9; Q84NE4; F1C943; A0A1G4P206; Q2PQJ6; D0ES19; D0ES20; D0ES16; R4JB44; Q6QGW0; A0A089VKK4; Q2L990; A0A0A0QYP7; B8XU51; Q38L52	0	975.453	8	H	H	H	H	H	NF	H	1.11	1	975.453	-0.41	4.4971
	H	SQQQQPQFSQQQQPPY		14	93	9	A0A0A0R2J7; G9AYK6; X2J8E3; Q5MFH0; P93794; A0A0A0R2I8; A0A1U9XLA9; Q84NE4; D0ES16; R4JB44; Q6QGW0; A0A089VKK4; A0A0A0QYP7; Q38L52	1	1946.9	16	NF	H	H	H	H	NF	NF	1.54	2	973.953	-0.33	13.8286
	H	SQQQQSPF		27	170	15	A0A0A0R2J7; G9AYK6; X2J8E3; F1C945; Q5MFH0; Q38L54; R9XUD0; A5JJ45; A0A0A0R2I8; A0A1U9XLA9; Q84NE4; F1C943; A0A1G4P206; X2JAE7; D0ES19; D0ES20; D0ES16; R4JB44; Q6QGW0; T1LG74; A0A346R8T7; A0A089VKK4; Q2L990; A0A0A0QYP7; B8XU51; V9P6N2; Q38L52	0	949.437	8	H	H	H	NF	H	H	H	1.32	1	949.436	-1.29	9.0241
	H	TSLAL		50	1284	464	D0F0C5; K7WV80; N1R0S5; K7WV72; A0A0A9RWM6; D0ES12; M7Z8V3; G9AYK6; A0A368QQ96; A0A2P1BXV0; Q670S2; I1ILT7; A0A0Q3GGG2; Q6J6V0; R4JFH5; A0A287GA23; R4JAP5; J3M5K7; Q6J6U9; A0A2R4Q9T7; M8AHS2; A0A0E0MHA4; D3U329; A0A1E5W740; F2DFY3; B5A816; Q84NE4; A0A0D9ZSX2; M0Y530; A0A0E0JEE4; A0A2R4Q9T1; A0A0D9UX31; R4JB62; A0A0E0L7K0; A0A0E0PGE1; R4JD66; A0A1Z5R643; A0A0E0JER3; A0A2R4Q9U1; A0A2R4Q9S8; Q9XGF0;…	1	504.303	5	H	H	H	H	H	H	H	1.74	1	504.303	-0.29	13.2342
TRUE	Master Protein	A0A089VKK4	Low-molecular-weight glutenin subunit (Fragment) OS=Triticum urartu OX=4572 GN=LMW-GS PE=4 SV=1	86.6864	48	1863	3	1	338	38.9	8.15	H	H	H	H	H	H	H	1601.31	48
	Confidence	Sequence	Modifications	# Protein Groups	# Proteins	# PSMs	Master Protein Accessions	# Missed Cleavages	Theo. MH+ [Da]	Sequence Length	Found in Sample Group: 1_AG38Duetto	Found in Sample Group: 5_AG167PI	Found in Sample Group: S_Semola	Found in Sample Group: 4_AG77Neolatino	Found in Sample Group: 3_AG69Lloyd	Found in Sample Group: SI_SemolaIntegrale	Found in Sample Group: 2_AG33Colosseo	XCorr Sequest HT	Charge Sequest HT	m/z [Da] Sequest HT	DeltaM [ppm] Sequest HT	RT [min] Sequest HT
	H	AHGTF		21	178	41	Q38L53; G9AYK6; X2J8E3; F1C945; Q5MFH0; R9XUD0; P93794; A0A1U9XLA9; Q84NE4; F1C943; X2JAE7; A0A1D6L3W9; D0ES16; Q9XGF0; Q84U16; Q6QGW0; A0A089VKK4; Q2L990; A0A0A0QYP7; K7R468; Q38L52	0	532.251	5	H	NF	H	H	H	H	H	1.46	1	532.251	-0.49	3.0046
	H	ARSQML		49	270	7	D0F0C5; J9QEK9; D0ES12; B2LWZ2; G0YLZ2; G9AYK6; A0A2P1BXV0; B5A810; C8CCM7; Q6J6V0; R4JFH5; A0A346R8U1; R4JAP5; A9YWM3; D3U329; P93794; J9QFV1; C6K8R8; A0A287EIZ3; F5A7G7; B5A816; Q84NE4; A0A2R4Q9T1; A0A346R8U2; F6KHQ0; R4JB62; D0ES19; B5A813; F1C940; A0A0U3AIG6; Q5XXZ9; D5FPE9; Q9XGF0; A8CA05; Q3YB17; B2LWZ6; A0A346R8T9; Q84U16; T1LG74; A0A346R8T7; A0A2R4Q9V4; A0A346R8T6; A0A089VKK4; Q2L990; A0A…	0	705.371	6	H	NF	H	H	H	H	H	1.23	1	705.37	-1.74	3.2777
	H	GQQPQQQQL		29	250	39	D0F0C5; K7WV80; A0A3G3C4J5; A0A165R8I1; D0ES12; R9XVA5; A0A0A0R2J7; G9AYK6; X2J8E3; R4JFH5; P93794; Q84NE4; R4JDM1; Q5MFK8; Q2PQJ6; A0A346R8U2; D0ES19; F1C940; Q9XGF0; Q3YB17; Q5MFH4; T1LG74; A0A346R8T7; A0A2R4Q9V4; A0A089VKK4; Q2L990; A0A0A0QYP7; B8XU51; B2LX00	0	1054.53	9	H	H	H	H	H	H	H	2.05	1	1054.53	-0.47	3.9132
	H	GVGIGVGVY		17	100	18	Q38L53; A0A0A0R2J7; R9XV91; Q670S2; Q5MFH0; Q38L54; P93794; A0A1U9XLA9; Q84NE4; A0A1G4P206; Q2PQJ6; Q6QGW0; A0A089VKK4; Q2L990; A0A0A0QYP7; K7R468; Q38L52	0	820.456	9	H	NF	NF	H	NF	H	H	1.71	1	820.455	-1.38	21.6236
	H	LQPHQLAQL		53	256	324	D0F0C5; K7WV80; A9YRN9; C6K8R4; A0A287EFH8; D0ES12; B2LWZ2; G0YLZ2; G9AYK6; A0A2P1BXV0; Q670S2; B5A810; C8CCM7; Q6J6V0; R4JAP5; A9YWM3; D3U329; P93794; J9QFV1; C6K8R8; A0A287EIZ3; F5A7G7; B5A816; Q84NE4; A0A2R4Q9T1; A0A346R8U2; F6KHQ0; Q40026; R4JB62; Q84U17; B5A813; F1C940; A0A0U3AIG6; Q5XXZ9; C8CCM8; D5FPE9; Q9XGF0; A0A287EFG2; A8CA05; Q3YB17; B2LWZ6; A0A346R8T9; Q84U16; A0A346R8T7; A0A2R4Q9V4;…	2	1047.59	9	H	H	H	H	H	H	H	2.76	2	524.301	1.03	10.8766
	H	LQQQCIPVAM	1xCarbamidomethyl [C5]	28	177	32	Q38L53; I3QPH4; A0A0A0R2J7; G9AYK6; X2J8E3; F1C945; R9XV91; Q5MFH0; Q38L54; R4JFH5; R9XUD0; R9YTM4; P93794; A0A1U9XLA9; C6KI71; Q84NE4; F1C943; Q2PQJ6; X2JAE7; D0ES16; R4JB44; Q6QGW0; T1LG74; A0A346R8T7; A0A089VKK4; K7R468; V9P6N2; Q38L52	4	1187.59	10	H	H	H	H	H	H	H	2.03	2	594.299	-0.94	18.9972
	H	QISQQQQPPPF	1xGln->pyro-Glu [N-Term]	10	74	8	A0A0A0R2J7; G9AYK6; Q5MFH0; Q84NE4; F1C943; D0ES16; R4JB44; Q6QGW0; A0A068F8R5; A0A089VKK4	1	1280.63	11	NF	H	H	H	H	NF	NF	1.66	2	640.817	0.5	26.9544
	H	QPHQLAQL		53	256	14	D0F0C5; K7WV80; A9YRN9; C6K8R4; A0A287EFH8; D0ES12; B2LWZ2; G0YLZ2; G9AYK6; A0A2P1BXV0; Q670S2; B5A810; C8CCM7; Q6J6V0; R4JAP5; A9YWM3; D3U329; P93794; J9QFV1; C6K8R8; A0A287EIZ3; F5A7G7; B5A816; Q84NE4; A0A2R4Q9T1; A0A346R8U2; F6KHQ0; Q40026; R4JB62; Q84U17; B5A813; F1C940; A0A0U3AIG6; Q5XXZ9; C8CCM8; D5FPE9; Q9XGF0; A0A287EFG2; A8CA05; Q3YB17; B2LWZ6; A0A346R8T9; Q84U16; A0A346R8T7; A0A2R4Q9V4;…	1	934.51	8	H	NF	H	H	H	H	H	1.53	2	467.759	0.32	5.8896
	H	QQLNPCKVF	1xCarbamidomethyl [C6]	46	251	287	D0F0C5; K7WV80; N1R0S5; K7WV72; G0YLZ2; G9AYK6; A0A2P1BXV0; I3QPG3; A0A346R8U0; Q6J6V0; R4JFH5; A0A346R8U1; R4JAP5; Q6J6U9; A0A2R4Q9T7; D3U329; R4JFK3; P93794; C6K8R8; A0A287EIZ3; B5A816; Q84NE4; I3QPH1; A0A2R4Q9T1; A0A346R8U2; Q40026; R4JB62; A0A0U3AIG6; D7RFI1; R4JD66; A0A2R4Q9U1; A0A2R4Q9S8; Q9XGF0; A8CA05; Q3YB17; B2LWZ6; A0A346R8T7; A0A2R4Q9V4; A0A346R8T6; A0A089VKK4; A8IEC6; A0A2R4Q9S5; B2L…	1	1133.58	9	H	H	H	H	H	H	H	2.56	2	567.292	0.33	14.0594
	H	QQLNPCKVF	1xGln->pyro-Glu [N-Term]; 1xCarbamidomethyl [C6]	46	250	108	D0F0C5; K7WV80; N1R0S5; K7WV72; G0YLZ2; G9AYK6; A0A2P1BXV0; I3QPG3; A0A346R8U0; Q6J6V0; R4JFH5; A0A346R8U1; R4JAP5; Q6J6U9; A0A2R4Q9T7; D3U329; R4JFK3; P93794; C6K8R8; A0A287EIZ3; B5A816; Q84NE4; I3QPH1; A0A2R4Q9T1; A0A346R8U2; Q40026; R4JB62; A0A0U3AIG6; D7RFI1; R4JD66; A0A2R4Q9U1; A0A2R4Q9S8; Q9XGF0; A8CA05; Q3YB17; B2LWZ6; A0A346R8T7; A0A2R4Q9V4; A0A346R8T6; A0A089VKK4; A8IEC6; A0A2R4Q9S5; B2L…	1	1116.55	9	H	H	H	H	H	H	H	1.47	1	1116.55	0.02	23.8566
	H	QQQLGQQPQQQQL	1xGln->pyro-Glu [N-Term]	26	166	3	Q38L53; A0A0A0R2J7; G9AYK6; X2J8E3; F1C945; R9XV91; Q5MFH0; R9XUD0; P93794; A0A1U9XLA9; Q84NE4; A0A1G4P206; Q2PQJ6; A0A346R8U2; X2JAE7; D0ES19; D0ES20; D0ES16; R4JB44; Q6QGW0; A2IBV2; A0A089VKK4; Q2L990; A0A0A0QYP7; B2LX00; Q38L52	1	1534.76	13	H	NF	NF	NF	NF	NF	H	1.21	2	767.885	0.84	18.0764
	H	QQQLGQQPQQQQL		26	166	23	Q38L53; A0A0A0R2J7; G9AYK6; X2J8E3; F1C945; R9XV91; Q5MFH0; R9XUD0; P93794; A0A1U9XLA9; Q84NE4; A0A1G4P206; Q2PQJ6; A0A346R8U2; X2JAE7; D0ES19; D0ES20; D0ES16; R4JB44; Q6QGW0; A2IBV2; A0A089VKK4; Q2L990; A0A0A0QYP7; B2LX00; Q38L52	1	1551.79	13	H	H	H	H	H	H	H	2.97	2	776.396	-1.49	9.8089
	H	QQQQPQQL	1xGln->pyro-Glu [N-Term]	15	118	3	Q38L53; A0A0A0R2J7; X2J8E3; R9XV91; Q38L54; R9XUD0; P93794; A0A1G4P206; Q2PQJ6; X2JAE7; R4JB44; A0A089VKK4; Q2L990; A0A0A0QYP7; K7R468	0	980.48	8	H	NF	NF	NF	NF	NF	H	1.28	1	980.479	-1.09	11.6668
	H	QQQQPQQL		19	159	18	Q38L53; A0A0A0R2J7; X2J8E3; R9XV91; Q38L54; R9XUD0; P93794; A0A1G4P206; A0A0N9LF97; Q2PQJ6; X2JAE7; R4JB44; A2IBV2; T1LG74; A0A089VKK4; Q2L990; A0A0A0QYP7; K7R468; A0A068F9M3	0	997.506	8	H	NF	NF	NF	H	H	H	2.21	1	997.505	-1.13	4.0839
	H	RQIPEQSRHESIRAIVY		8	68	322	R9XV91; Q38L54; R9XUD0; Q2PQJ6; D0ES19; D0ES20; A0A089VKK4; A0A0A0QYP7	0	2082.12	17	H	NF	NF	NF	NF	H	H	4.13	4	521.287	2.56	5.77
	H	SQQPPISQQQQPPF		28	161	10	A0A0A0R2J7; G9AYK6; X2J8E3; F1C945; R9XV91; Q5MFH0; Q38L54; R4JFH5; R9XUD0; R9YTM4; P93794; A0A0A0R2I8; A0A1U9XLA9; C6KI71; Q84NE4; F1C943; A0A1G4P206; Q2PQJ6; X2JAE7; D0ES16; R4JB44; Q6QGW0; T1LG74; A0A089VKK4; A0A0A0QYP7; K7R468; V9P6N2; Q38L52	0	1609.8	14	H	NF	NF	H	NF	H	H	1.32	2	805.401	-0.74	17.0117
	H	SQQPPISQQQQPPFSQQQQPPFSQQQQIPVIHPSVL		17	98	20	G9AYK6; F1C945; R9XV91; Q5MFH0; Q38L54; R4JFH5; A0A1U9XLA9; Q84NE4; F1C943; A0A1G4P206; X2JAE7; D0ES16; R4JB44; Q6QGW0; A0A089VKK4; A0A0A0QYP7; K7R468	2	4105.09	36	H	H	H	H	H	H	H	3.74	3	1369.03	-0.16	28.3134
	H	SQQQQIPVIHPSVL		28	173	108	Q38L53; A0A0A0R2J7; G9AYK6; X2J8E3; F1C945; R9XV91; Q5MFH0; Q38L54; R4JFH5; R9XUD0; R9YTM4; P93794; A0A1U9XLA9; Q84NE4; F1C943; A0A1G4P206; X2JAE7; D0ES19; D0ES20; D0ES16; R4JB44; Q6QGW0; T1LG74; A0A089VKK4; Q2L990; A0A0A0QYP7; K7R468; V9P6N2	0	1573.87	14	H	H	H	H	H	H	H	3.7	2	787.438	-0.3	20.1699
	H	SQQQQPPF		42	254	83	N1R0S5; A0A165R8I1; A9YRN9; B2LWZ2; A0A0A0R2J7; G9AYK6; A0A2P1BXV0; B5A810; C8CCM7; Q6J6V0; R4JFH5; Q5XXZ7; A9YWM3; Q6J6U9; A0A2R4Q9T7; D3U329; P93794; A0A0A0R2I8; B5A816; Q84NE4; A0A2R4Q9T1; Q2PQJ6; D0ES19; B5A813; A0A0U3AIG6; C8CCM8; D5FPE9; A0A2R4Q9U1; Q9XGF0; A8CA05; B2LWZ6; A0A346R8T9; Q84U16; T1LG74; A0A346R8T7; A0A346R8T6; A0A089VKK4; Q2L990; A0A0A0QYP7; A0A2R4Q9S5; B8XU51; X2JC88	0	959.458	8	H	H	H	H	H	H	H	2.1	2	480.233	-0.32	10.2887
	H	SQQQQPPFSQQQQIPVIHPSVL		22	127	39	Q38L53; G9AYK6; F1C945; R9XV91; Q5MFH0; Q38L54; R4JFH5; A0A1U9XLA9; Q84NE4; F1C943; A0A1G4P206; X2JAE7; D0ES19; D0ES20; D0ES16; R4JB44; Q6QGW0; T1LG74; A0A089VKK4; Q2L990; A0A0A0QYP7; K7R468	1	2514.31	22	H	H	H	H	H	H	H	3.15	2	1257.66	0.06	25.1568
	H	SQQQQPPFSQQQQIPVIHPSVL	1xDeamidated [Q]	22	124	4	Q38L53; G9AYK6; F1C945; R9XV91; Q5MFH0; Q38L54; R4JFH5; A0A1U9XLA9; Q84NE4; F1C943; A0A1G4P206; X2JAE7; D0ES19; D0ES20; D0ES16; R4JB44; Q6QGW0; T1LG74; A0A089VKK4; Q2L990; A0A0A0QYP7; K7R468	1	2515.29	22	NF	NF	H	NF	NF	NF	NF	1.07	2	1258.16	9.33	25.1861
	H	SQQQQPPFSQQQQPPF		49	266	54	A0A165R8I1; D3UAL8; B2LWZ2; R9XVA5; A0A0A0R2J7; G9AYK6; X2J8E3; F1C945; R9XV91; Q5MFH0; D5FPE3; B5A810; Q38L54; R4JFH5; A2IBV5; R9XUD0; P93794; A0A0A0R2I8; A0A1U9XLA9; C6KI71; Q8W3W8; Q84NE4; F1C943; A0A1G4P206; Q2PQJ6; X2JAE7; D0ES19; A0A024A269; Q8W3X4; D0ES20; D0ES16; R4JB44; Q9XGF0; A7XDG0; B2LWZ6; Q84U16; Q6QGW0; A0A068F8R5; T1LG74; A0A346R8T6; A0A089VKK4; A0A0A0QYP7; K7R468; B8XU51; V9P6N2;…	1	1899.9	16	H	H	H	H	H	H	H	4	2	950.452	-0.53	20.9553
	H	SQQQQPPFSQQQQPPFSQQQQSPF		12	90	77	G9AYK6; Q5MFH0; Q38L54; R9XUD0; A0A0A0R2I8; A0A1G4P206; D0ES16; Q6QGW0; A0A089VKK4; B8XU51; V9P6N2; Q38L52	2	2830.32	24	H	H	H	H	H	H	H	4.23	2	1415.66	-0.35	25.1365
	H	SQQQQPPFSQQQQQPPISQQQQPPF		1	1	59	A0A089VKK4	1	2934.41	25	H	NF	H	H	H	H	H	2.29	3	978.808	-0.76	23.392
	H	SQQQQPPFSQQQQQPPISQQQQPPF	1xDeamidated [Q]	1	1	63	A0A089VKK4	1	2935.4	25	H	NF	NF	NF	H	H	H	1.71	3	979.145	7.91	22.8499
	H	SQQQQPPFSQQQQSPF		19	141	31	G9AYK6; X2J8E3; Q5MFH0; Q38L54; R9XUD0; A0A0A0R2I8; A0A1U9XLA9; Q84NE4; A0A1G4P206; X2JAE7; D0ES16; R4JB44; Q6QGW0; T1LG74; A0A089VKK4; A0A0A0QYP7; B8XU51; V9P6N2; Q38L52	1	1889.88	16	H	H	H	H	H	H	H	2.9	2	945.442	-1	20.0925
	H	SQQQQPPY		25	148	10	A0A0A0R2J7; G9AYK6; X2J8E3; F1C945; R9XV91; Q5MFH0; Q38L54; R9XUD0; P93794; A0A0A0R2I8; A0A1U9XLA9; Q84NE4; F1C943; A0A1G4P206; Q2PQJ6; D0ES19; D0ES20; D0ES16; R4JB44; Q6QGW0; A0A089VKK4; Q2L990; A0A0A0QYP7; B8XU51; Q38L52	0	975.453	8	H	H	H	H	H	NF	H	1.11	1	975.453	-0.41	4.4971
	H	SQQQQPQFSQQQQPPY		14	93	9	A0A0A0R2J7; G9AYK6; X2J8E3; Q5MFH0; P93794; A0A0A0R2I8; A0A1U9XLA9; Q84NE4; D0ES16; R4JB44; Q6QGW0; A0A089VKK4; A0A0A0QYP7; Q38L52	1	1946.9	16	NF	H	H	H	H	NF	NF	1.54	2	973.953	-0.33	13.8286
	H	SQQQQQPPISQQQQPPF		1	1	56	A0A089VKK4	0	1993.97	17	H	H	H	H	H	H	H	3.2	2	997.49	0.1	17.4925
	H	SQQQQQPPISQQQQPPFSQQPPISQQQQPPFSQQQQPPF	2xDeamidated [Q20; Q25]	1	1	4	A0A089VKK4	2	4527.16	39	NF	NF	H	H	H	NF	H	2.65	3	1509.74	9.63	28.9989
	H	SQQQQSPF		27	170	15	A0A0A0R2J7; G9AYK6; X2J8E3; F1C945; Q5MFH0; Q38L54; R9XUD0; A5JJ45; A0A0A0R2I8; A0A1U9XLA9; Q84NE4; F1C943; A0A1G4P206; X2JAE7; D0ES19; D0ES20; D0ES16; R4JB44; Q6QGW0; T1LG74; A0A346R8T7; A0A089VKK4; Q2L990; A0A0A0QYP7; B8XU51; V9P6N2; Q38L52	0	949.437	8	H	H	H	NF	H	H	H	1.32	1	949.436	-1.29	9.0241
	H	TSLAL		50	1284	464	D0F0C5; K7WV80; N1R0S5; K7WV72; A0A0A9RWM6; D0ES12; M7Z8V3; G9AYK6; A0A368QQ96; A0A2P1BXV0; Q670S2; I1ILT7; A0A0Q3GGG2; Q6J6V0; R4JFH5; A0A287GA23; R4JAP5; J3M5K7; Q6J6U9; A0A2R4Q9T7; M8AHS2; A0A0E0MHA4; D3U329; A0A1E5W740; F2DFY3; B5A816; Q84NE4; A0A0D9ZSX2; M0Y530; A0A0E0JEE4; A0A2R4Q9T1; A0A0D9UX31; R4JB62; A0A0E0L7K0; A0A0E0PGE1; R4JD66; A0A1Z5R643; A0A0E0JER3; A0A2R4Q9U1; A0A2R4Q9S8; Q9XGF0;…	1	504.303	5	H	H	H	H	H	H	H	1.74	1	504.303	-0.29	13.2342
TRUE	Master Protein	Q41533	Alpha-gliadin (Fragment) OS=Triticum aestivum OX=4565 PE=4 SV=1	62.1622	15	1251	1	1	259	30	6.64	H	H	H	H	H	H	H	1598.25	15
	Confidence	Sequence	Modifications	# Protein Groups	# Proteins	# PSMs	Master Protein Accessions	# Missed Cleavages	Theo. MH+ [Da]	Sequence Length	Found in Sample Group: 1_AG38Duetto	Found in Sample Group: 5_AG167PI	Found in Sample Group: S_Semola	Found in Sample Group: 4_AG77Neolatino	Found in Sample Group: 3_AG69Lloyd	Found in Sample Group: SI_SemolaIntegrale	Found in Sample Group: 2_AG33Colosseo	XCorr Sequest HT	Charge Sequest HT	m/z [Da] Sequest HT	DeltaM [ppm] Sequest HT	RT [min] Sequest HT
	H	CTIAPF	1xCarbamidomethyl [C1]	18	253	140	A0A1P8DSI8; A0A0E3UQX3; M4WFC9; Q41533; M4WEQ6; A0A1P8DSH1; H8Y0D1; A0A1P8DSY8; H8Y0E6; Q0GK30; A0A1P8DSE0; M4WER7; A0A0E3UQX9; A0A1P8DSG6; A0A1P8DT27; H8Y0E7; G9I1R9; A0A0E3Z7K2	0	708.339	6	H	H	H	H	H	H	H	1.84	1	708.338	-0.2	19.4467
	H	HQQQKQQQQPSSQVSF		15	195	16	A0A1P8DSI8; A0A1P8DT82; Q9M4L8; Q41533; M4WEQ6; H9NAK8; I0CCD0; A0A1P8DT06; A0A023WGB8; A0A0E3Z5X0; Q0GK30; A0A1P8DSE0; R9XU77; A0A1P8DT27; A0A0E3Z5C7	0	1912.93	16	NF	H	H	H	H	H	H	2.1	2	956.964	-2.52	3.4526
	H	IGQQQPFPPQQPYPQPQPFPSQQPY		14	259	699	A0A1P8DSI8; A0A1P8DT82; M4WFC9; I3RXV8; Q41533; A0A1P8DT06; A0A023WGB8; A0A0E3URA8; D2X6C9; A0A0K2QJD8; Q0GK30; A0A1P8DSE3; A0A1P8DSG6; R9XU77	3	2922.42	25	H	H	H	H	H	H	H	4.46	2	1461.71	-0.59	26.6583
	H	IPPYCTIAPF	1xCarbamidomethyl [C5]	18	250	47	A0A1P8DSI8; A0A0E3UQX3; M4WFC9; Q41533; M4WEQ6; A0A1P8DSH1; H8Y0D1; A0A1P8DSY8; H8Y0E6; Q0GK30; M4WER7; A0A0E3UQX9; A0A1P8DSG6; A0A1P8DT27; H8Y0E7; G9I1R9; R9XSU5; A0A0E3Z7K2	1	1178.59	10	H	H	H	H	H	H	H	2.13	1	1178.59	-0.32	30.4528
	H	LGQQQPFPPQQPY		14	259	9	A0A1P8DSI8; A0A1P8DT82; M4WFC9; I3RXV8; Q41533; M4WEQ6; H9NAK8; A0A1P8DT06; A0A023WGB8; D2X6C9; Q0GK30; A0A1P8DSE3; A0A1P8DSG6; A0A0E3Z7K2	2	1527.76	13	NF	NF	H	NF	H	NF	NF	1.04	2	764.38	-3.74	17.7657
	H	QQYPL		19	265	70	A0A1P8DSI8; A0A0E3UQX3; A0A1P8DT82; Q9M4L8; Q41533; M4WEQ6; H9NAK8; I0CCD0; A0A1P8DT06; H8Y0D1; A0A023WGB8; A0A0E3Z5X0; A0A0N7A547; Q0GK30; A0A1P8DSE0; A0A0E3UR88; A0A0D9XG85; R9XU77; A0A1P8DT27	1	648.335	5	H	H	H	H	H	H	H	1.28	1	648.334	-1.52	11.483
	H	QQYPLGQGSF		17	234	30	A0A1P8DSI8; A0A0E3UQX3; A0A1P8DT82; Q9M4L8; Q41533; M4WEQ6; H9NAK8; I0CCD0; A0A1P8DT06; H8Y0D1; A0A023WGB8; A0A0E3Z5X0; Q0GK30; A0A1P8DSE0; A0A0E3UR88; R9XU77; A0A1P8DT27	2	1124.54	10	H	H	H	H	H	H	H	2.19	1	1124.54	-1.4	20.3788
	H	SQPQPF		16	253	23	A0A1P8DSI8; Q2QL61; A0A1P8DT82; M4WFC9; Q41533; M4WEQ6; H9NAK8; A0A1P8DT06; A0A023WGB8; A0A0E3Z5X0; D2X6C9; Q0GK30; A0A1P8DSE3; A0A0E3UQX9; A0A1P8DT27; A0A0E3Z7K2	0	703.341	6	H	H	H	H	H	H	H	1.67	1	703.341	-0.21	9.3433
	H	VRVPVPQLQPQNPSQQQPQEQVPL	1xDeamidated [Q/N]; 1xAcetyl [N-Term]	27	3	270	Q41533	1	2777.46	24	H	H	H	H	H	H	H	4.3	2	1389.24	3.78	30.0276
	H	VRVPVPQLQPQNPSQQQPQEQVPL		27	253	373	A0A2R2Y432; G9I1R6; I3RXY0; A0A1P8DT82; R9XST5; I3RXV8; A0A1P8DTB0; A0A0E3URC4; A0A0E3URC2; Q41533; Q2QL52; A0A1P8DSH1; A0A0E3Z5J4; A0A291I1T3; M4WYH4; E0Z2G0; Q2QL42; A5JSA3; U3PXH9; Q0GK30; I0IT53; I0IT57; I3RXW9; H8Y0E7; I0IT59; G9I1R9; A0A0E3Z7K2	1	2734.46	24	H	H	H	H	H	H	H	5.68	2	1367.74	-0.2	23.137
	H	VRVPVPQLQPQNPSQQQPQEQVPLVQQQQF		1	2	5	Q41533	2	3492.83	30	NF	H	H	NF	NF	H	NF	1.98	3	1164.95	-0.54	25.7049
	H	XGQQQPFPPQQPYPQPQPF		13	259	24	A0A1P8DSI8; A0A1P8DT82; M4WFC9; I3RXV8; Q41533; A0A1P8DT06; A0A023WGB8; A0A0E3URA8; D2X6C9; A0A0K2QJD8; Q0GK30; A0A1P8DSE3; A0A1P8DSG6	2	2222.1	19	NF	H	H	NF	H	H	NF	1.6	2	1111.55	-0.59	25.7783
TRUE	Master Protein	A8CA05	Low molecular weight glutenin OS=Triticum aestivum subsp. yunnanense OX=425487 PE=4 SV=1	91.8495	50	1934	2	1	319	36.2	8.32	H	H	H	H	H	H	H	1586.13	50
	Confidence	Sequence	Modifications	# Protein Groups	# Proteins	# PSMs	Master Protein Accessions	# Missed Cleavages	Theo. MH+ [Da]	Sequence Length	Found in Sample Group: 1_AG38Duetto	Found in Sample Group: 5_AG167PI	Found in Sample Group: S_Semola	Found in Sample Group: 4_AG77Neolatino	Found in Sample Group: 3_AG69Lloyd	Found in Sample Group: SI_SemolaIntegrale	Found in Sample Group: 2_AG33Colosseo	XCorr Sequest HT	Charge Sequest HT	m/z [Da] Sequest HT	DeltaM [ppm] Sequest HT	RT [min] Sequest HT
	H	ARSQML		49	270	7	D0F0C5; J9QEK9; D0ES12; B2LWZ2; G0YLZ2; G9AYK6; A0A2P1BXV0; B5A810; C8CCM7; Q6J6V0; R4JFH5; A0A346R8U1; R4JAP5; A9YWM3; D3U329; P93794; J9QFV1; C6K8R8; A0A287EIZ3; F5A7G7; B5A816; Q84NE4; A0A2R4Q9T1; A0A346R8U2; F6KHQ0; R4JB62; D0ES19; B5A813; F1C940; A0A0U3AIG6; Q5XXZ9; D5FPE9; Q9XGF0; A8CA05; Q3YB17; B2LWZ6; A0A346R8T9; Q84U16; T1LG74; A0A346R8T7; A0A2R4Q9V4; A0A346R8T6; A0A089VKK4; Q2L990; A0A…	0	705.371	6	H	NF	H	H	H	H	H	1.23	1	705.37	-1.74	3.2777
	H	CSVNVPVY	1xCarbamidomethyl [C1]	22	93	3	A2IBK1; Q8W3X5; A0A2P1BXV0; Q6J6V0; A0A0U3ANN8; A0A346R8U1; R4JAP5; A9YWM3; D3U329; F8SGM9; A0A2R4Q9T1; R4JB62; D5FPF3; A0A0U3AIG6; C8CCM8; A2IBJ9; D5FPE9; A8CA05; F8SGM7; D5FPF4; Q68VI0; F8SGN9	3	937.445	8	NF	NF	H	NF	H	NF	H	1.18	1	937.444	-0.8	16.9848
	H	DAIRAIIY		25	101	217	A2IBK1; Q8W3X5; A0A2P1BXV0; Q6J6V0; A0A0U3ANN8; R4JAP5; A9YWM3; D5FPF1; D3U329; V9P785; F8SGM9; A0A2R4Q9T1; R4JB62; D5FPF3; A0A0U3AIG6; Q41552; C8CCM8; A2IBJ9; D5FPE9; A8CA05; F8SGM7; D5FPF4; Q68VI0; F8SGN9; B8Y0L6	0	934.536	8	H	H	H	H	H	H	H	2.32	2	467.772	0.44	19.2101
	H	GQWPQQQQVPQGTL		22	88	15	A2IBK1; Q8W3X5; A0A2P1BXV0; Q6J6V0; A0A0U3ANN8; R4JAP5; A9YWM3; D3U329; V9P785; F8SGM9; A0A2R4Q9T1; R4JB62; D5FPF3; A0A0U3AIG6; C8CCM8; A2IBJ9; A8CA05; F8SGM7; D5FPF4; Q68VI0; F8SGN9; B8Y0L6	1	1594.8	14	H	H	H	H	H	H	H	2.49	2	797.901	-1.57	19.641
	H	GQWPQQQQVPQGTLLQPHQIAQL		20	86	3	A2IBK1; Q8W3X5; A0A2P1BXV0; Q6J6V0; A0A0U3ANN8; R4JAP5; A9YWM3; D3U329; V9P785; F8SGM9; A0A2R4Q9T1; R4JB62; D5FPF3; A0A0U3AIG6; C8CCM8; A2IBJ9; A8CA05; D5FPF4; Q68VI0; F8SGN9	3	2623.37	23	NF	NF	NF	H	H	NF	NF	1.39	3	875.128	-1.24	25.9172
	H	GTTTIVPF		12	67	14	Q8W3X5; A0A2P1BXV0; A0A0U3ANN8; F8SGM9; R4JB62; C8CCM8; A2IBJ9; A8CA05; F8SGM7; D5FPF4; Q68VI0; F8SGN9	0	835.456	8	H	H	H	H	H	H	H	1.56	1	835.456	0.58	24.7638
	H	GVGTRVGAY		18	72	20	A2IBK1; Q8W3X5; A0A2P1BXV0; A0A0U3ANN8; R4JAP5; A9YWM3; D5FPF1; D3U329; F8SGM9; R4JB62; D5FPF3; C8CCM8; A2IBJ9; A8CA05; F8SGM7; D5FPF4; F8SGN9; B8Y0L6	0	879.468	9	H	H	H	H	H	H	H	1.63	2	440.237	-1.23	3.9266
	H	LQPHQLAQL		53	256	324	D0F0C5; K7WV80; A9YRN9; C6K8R4; A0A287EFH8; D0ES12; B2LWZ2; G0YLZ2; G9AYK6; A0A2P1BXV0; Q670S2; B5A810; C8CCM7; Q6J6V0; R4JAP5; A9YWM3; D3U329; P93794; J9QFV1; C6K8R8; A0A287EIZ3; F5A7G7; B5A816; Q84NE4; A0A2R4Q9T1; A0A346R8U2; F6KHQ0; Q40026; R4JB62; Q84U17; B5A813; F1C940; A0A0U3AIG6; Q5XXZ9; C8CCM8; D5FPE9; Q9XGF0; A0A287EFG2; A8CA05; Q3YB17; B2LWZ6; A0A346R8T9; Q84U16; A0A346R8T7; A0A2R4Q9V4;…	2	1047.59	9	H	H	H	H	H	H	H	2.76	2	524.301	1.03	10.8766
	H	LQQQCSPVAMPQSL	1xCarbamidomethyl [C5]	33	198	8	R9XVA5; A2IBK1; Q8W3X5; A0A2P1BXV0; D5FPE3; C8CCM7; Q6J6V0; A2IBV5; A9YWM3; D5FPF1; D3U329; V9P785; F8SGM9; Q8W3W8; R4JDM1; A0A2R4Q9T1; K0I5W1; R4JB62; D5FPF3; A0A0U3AGE0; Q41552; Q8W3X4; C8CCM8; A2IBJ9; A8CA05; F8SGM7; D5FPF4; Q68VI0; F8SGN9; Q8W3X0; B2Y2R6; B8Y0L6; A0A0U3ATU4	1	1586.77	14	NF	NF	H	H	H	H	H	1.9	2	793.886	-1	21.583
	H	NQPQQQQPQQSVQGVSQPQQQQKQL		20	82	21	A2IBK1; Q8W3X5; A0A2P1BXV0; Q6J6V0; A0A0U3ANN8; R4JAP5; A9YWM3; D5FPF1; D3U329; V9P785; F8SGM9; A0A2R4Q9T1; R4JB62; Q41552; C8CCM8; A2IBJ9; A8CA05; F8SGM7; F8SGN9; B8Y0L6	0	2887.44	25	H	H	H	H	H	H	H	2.26	3	963.15	-1.6	7.5568
	H	QPHQLAQL		53	256	14	D0F0C5; K7WV80; A9YRN9; C6K8R4; A0A287EFH8; D0ES12; B2LWZ2; G0YLZ2; G9AYK6; A0A2P1BXV0; Q670S2; B5A810; C8CCM7; Q6J6V0; R4JAP5; A9YWM3; D3U329; P93794; J9QFV1; C6K8R8; A0A287EIZ3; F5A7G7; B5A816; Q84NE4; A0A2R4Q9T1; A0A346R8U2; F6KHQ0; Q40026; R4JB62; Q84U17; B5A813; F1C940; A0A0U3AIG6; Q5XXZ9; C8CCM8; D5FPE9; Q9XGF0; A0A287EFG2; A8CA05; Q3YB17; B2LWZ6; A0A346R8T9; Q84U16; A0A346R8T7; A0A2R4Q9V4;…	1	934.51	8	H	NF	H	H	H	H	H	1.53	2	467.759	0.32	5.8896
	H	QQLNPCKVF	1xCarbamidomethyl [C6]	46	251	287	D0F0C5; K7WV80; N1R0S5; K7WV72; G0YLZ2; G9AYK6; A0A2P1BXV0; I3QPG3; A0A346R8U0; Q6J6V0; R4JFH5; A0A346R8U1; R4JAP5; Q6J6U9; A0A2R4Q9T7; D3U329; R4JFK3; P93794; C6K8R8; A0A287EIZ3; B5A816; Q84NE4; I3QPH1; A0A2R4Q9T1; A0A346R8U2; Q40026; R4JB62; A0A0U3AIG6; D7RFI1; R4JD66; A0A2R4Q9U1; A0A2R4Q9S8; Q9XGF0; A8CA05; Q3YB17; B2LWZ6; A0A346R8T7; A0A2R4Q9V4; A0A346R8T6; A0A089VKK4; A8IEC6; A0A2R4Q9S5; B2L…	1	1133.58	9	H	H	H	H	H	H	H	2.56	2	567.292	0.33	14.0594
	H	QQLNPCKVF	1xGln->pyro-Glu [N-Term]; 1xCarbamidomethyl [C6]	46	250	108	D0F0C5; K7WV80; N1R0S5; K7WV72; G0YLZ2; G9AYK6; A0A2P1BXV0; I3QPG3; A0A346R8U0; Q6J6V0; R4JFH5; A0A346R8U1; R4JAP5; Q6J6U9; A0A2R4Q9T7; D3U329; R4JFK3; P93794; C6K8R8; A0A287EIZ3; B5A816; Q84NE4; I3QPH1; A0A2R4Q9T1; A0A346R8U2; Q40026; R4JB62; A0A0U3AIG6; D7RFI1; R4JD66; A0A2R4Q9U1; A0A2R4Q9S8; Q9XGF0; A8CA05; Q3YB17; B2LWZ6; A0A346R8T7; A0A2R4Q9V4; A0A346R8T6; A0A089VKK4; A8IEC6; A0A2R4Q9S5; B2L…	1	1116.55	9	H	H	H	H	H	H	H	1.47	1	1116.55	0.02	23.8566
	H	QQPPFSQQQQQFPQQQQPLLPQQPPFSQHQQPVL	1xDeamidated [Q]	1	1	20	A8CA05	5	4036.01	34	NF	NF	NF	NF	H	NF	NF	1.02	3	1346.01	2.35	35.0056
	H	QQPQQQQL		26	108	96	G0YLZ2; A2IBK1; Q8W3X5; A0A2P1BXV0; A0A0U3ANN8; Q5XXZ7; R4JAP5; A9YWM3; D5FPF1; V9P785; F8SGM9; R4JB62; D5FPF3; A0A0U3AGE0; A0A0U3AIG6; C8CCM8; A2IBJ9; D5FPE9; A8CA05; F8SGM7; D4HNA5; D5FPF4; F5A7G6; Q68VI0; F8SGN9; B8Y0L6	0	997.506	8	H	H	H	H	H	H	H	2.65	1	997.505	-0.95	3.8091
	H	QQPQQQQL	1xGln->pyro-Glu [N-Term]	25	103	5	G0YLZ2; A2IBK1; Q8W3X5; A0A2P1BXV0; A0A0U3ANN8; Q5XXZ7; R4JAP5; A9YWM3; D5FPF1; V9P785; F8SGM9; R4JB62; D5FPF3; A0A0U3AIG6; C8CCM8; A2IBJ9; D5FPE9; A8CA05; F8SGM7; D4HNA5; D5FPF4; F5A7G6; Q68VI0; F8SGN9; B8Y0L6	0	980.48	8	NF	NF	NF	NF	H	H	H	1.55	2	490.743	-0.23	11.7416
	H	QQQPIPL		17	76	166	A2IBK1; Q8W3X5; A0A2P1BXV0; A0A0U3ANN8; A9YWM3; V9P785; F8SGM9; R4JB62; C8CCM8; A2IBJ9; A8CA05; F8SGM7; A7X9Y0; D5FPF4; Q68VI0; F8SGN9; B8Y0L6	0	823.467	7	H	H	H	H	H	H	H	1.76	1	823.466	-0.9	16.4551
	H	QQQPLPL	1xGln->pyro-Glu [N-Term]	17	76	42	A2IBK1; Q8W3X5; A0A2P1BXV0; A0A0U3ANN8; A9YWM3; V9P785; F8SGM9; R4JB62; C8CCM8; A2IBJ9; A8CA05; F8SGM7; A7X9Y0; D5FPF4; Q68VI0; F8SGN9; B8Y0L6	1	806.441	7	H	NF	H	H	H	H	H	1.05	1	806.44	-0.23	27.8002
	H	QQQPLPLQQILW		17	74	22	A2IBK1; Q8W3X5; A0A2P1BXV0; A0A0U3ANN8; A9YWM3; V9P785; F8SGM9; R4JB62; C8CCM8; A2IBJ9; A8CA05; F8SGM7; A7X9Y0; D5FPF4; Q68VI0; F8SGN9; B8Y0L6	3	1491.83	12	NF	NF	H	H	H	H	H	2.41	2	746.419	-0.73	38.6784
	H	RTLPTM		48	251	45	D0F0C5; N1R0S5; K7WV72; J9QEK9; A9YRN9; C6K8R4; G0YLZ2; A0A2P1BXV0; W8E197; W8E194; I3QPG3; W8E1A2; B5A810; C8CCM7; R4JFH5; Q5XXZ7; R4JAP5; A9YWM3; Q6J6U9; A0A2R4Q9T7; J9QFV1; W8E6H6; H8Y0M0; B5A816; W8E2L7; F6KHQ0; R4JB62; W8E6G7; B5A813; K7XED4; D7RFI1; C8CCM8; W8E0F4; A0A2R4Q9U1; A0A2R4Q9S8; W8E5R1; Q9XGF0; A8CA05; Q84U16; Q6B780; A0A346R8T7; A8IEC6; A0A0K2GRQ1; A0A2R4Q9S5; B6UKQ7; X2JC88; A8I…	1	718.392	6	H	H	H	H	H	H	H	1.27	1	718.39	-2.41	5.4248
	H	RTLPTMCSVNVPVY	1xCarbamidomethyl [C7]	16	71	34	A2IBK1; Q8W3X5; A0A2P1BXV0; A0A0U3ANN8; R4JAP5; A9YWM3; F8SGM9; R4JB62; D5FPF3; C8CCM8; A2IBJ9; A8CA05; F8SGM7; D5FPF4; Q68VI0; F8SGN9	1	1636.82	14	H	H	H	H	H	H	H	2.98	2	818.912	-0.76	21.4662
	H	RTLPTMCSVNVPVY	1xOxidation [M6]; 1xCarbamidomethyl [C7]	16	71	9	A2IBK1; Q8W3X5; A0A2P1BXV0; A0A0U3ANN8; R4JAP5; A9YWM3; F8SGM9; R4JB62; D5FPF3; C8CCM8; A2IBJ9; A8CA05; F8SGM7; D5FPF4; Q68VI0; F8SGN9	1	1652.81	14	H	NF	NF	H	H	NF	H	2.36	2	826.909	-1.08	16.5473
	H	RTLPTMCSVNVPVYGTTTIVPF	1xCarbamidomethyl [C7]	12	65	51	Q8W3X5; A0A2P1BXV0; A0A0U3ANN8; F8SGM9; R4JB62; C8CCM8; A2IBJ9; A8CA05; F8SGM7; D5FPF4; Q68VI0; F8SGN9	2	2453.26	22	H	H	H	H	H	H	H	3.94	2	1227.13	-0.53	32.7605
	H	SIVLQEQQHGQGL		13	73	76	A2IBK1; Q8W3X5; A0A2P1BXV0; A0A0U3ANN8; A9YWM3; V9P785; F8SGM9; R4JB62; C8CCM8; A2IBJ9; A8CA05; F8SGM7; D5FPF4	1	1436.75	13	H	H	H	H	H	H	H	3.2	2	718.878	0.24	12.2673
	H	SIVLQEQQHGQGLNQPQQQQPQQSVQGVSQPQQQQKQL	1xDeamidated [Q]	12	60	7	A2IBK1; Q8W3X5; A0A2P1BXV0; A0A0U3ANN8; A9YWM3; V9P785; F8SGM9; R4JB62; C8CCM8; A2IBJ9; A8CA05; F8SGM7	2	4306.16	38	NF	NF	NF	NF	NF	H	NF	1.02	3	1436.06	-0.21	13.363
	H	SQHQQPVLPQQQIPSVQPSIL		12	68	55	A2IBK1; Q8W3X5; A0A2P1BXV0; V9P785; F8SGM9; R4JB62; A2IBJ9; A8CA05; F8SGM7; D5FPF4; F8SGN9; B8Y0L6	1	2352.27	21	H	H	H	H	H	H	H	4.59	2	1176.64	-0.05	23.8399
	H	SQQQPPF		36	253	26	K7WV80; A0A3G3C4J5; K7WV72; B8XU59; P93792; Q8W3X5; A0A2P1BXV0; Q8W3V8; C8CCM7; Q6J6V0; R4JAP5; A9YWM3; D2DII6; D3U329; R4JFK3; R4JDM1; Q5MFK8; I3QPH1; A0A2R4Q9T1; A0A346R8U2; R4JB62; F1C940; A0A0U3AIG6; Q41552; K7XED4; D7RFI1; C8CCM8; F8SGM2; R4JD66; D5FPE9; A8CA05; A0A346R8T9; Q6B780; A0A2R4Q9V4; B2LX00; C6KI73	0	831.4	7	H	H	H	H	H	H	H	1.48	1	831.399	-1.26	10.1053
	H	SQQQQPPF		42	254	83	N1R0S5; A0A165R8I1; A9YRN9; B2LWZ2; A0A0A0R2J7; G9AYK6; A0A2P1BXV0; B5A810; C8CCM7; Q6J6V0; R4JFH5; Q5XXZ7; A9YWM3; Q6J6U9; A0A2R4Q9T7; D3U329; P93794; A0A0A0R2I8; B5A816; Q84NE4; A0A2R4Q9T1; Q2PQJ6; D0ES19; B5A813; A0A0U3AIG6; C8CCM8; D5FPE9; A0A2R4Q9U1; Q9XGF0; A8CA05; B2LWZ6; A0A346R8T9; Q84U16; T1LG74; A0A346R8T7; A0A346R8T6; A0A089VKK4; Q2L990; A0A0A0QYP7; A0A2R4Q9S5; B8XU51; X2JC88	0	959.458	8	H	H	H	H	H	H	H	2.1	2	480.233	-0.32	10.2887
	H	SQQQQQFPQQQQPL		9	56	3	A2IBK1; A0A2P1BXV0; A0A0U3ANN8; V9P785; F8SGM9; A2IBJ9; A8CA05; F8SGM7; F8SGN9	1	1712.84	14	NF	NF	NF	H	H	NF	NF	1.65	2	856.92	-1.03	13.6968
	H	YQQQQPIQQQPQPF		13	65	7	A2IBK1; Q8W3X5; A0A2P1BXV0; V9P785; F8SGM9; R4JB62; A2IBJ9; A8CA05; F8SGM7; A7X9Y0; Q68VI0; F8SGN9; B8Y0L6	1	1757.86	14	NF	NF	H	H	H	NF	H	1.72	2	879.434	-0.44	16.7584
	H	YQQQQPIQQQPQPFPQQPPCSQQQQPPLSQQQQPPF	1xDeamidated [Q]; 1xCarbamidomethyl [C20]	9	48	4	A2IBK1; Q8W3X5; A0A2P1BXV0; V9P785; F8SGM9; A8CA05; F8SGM7; F8SGN9; B8Y0L6	3	4313.05	36	H	NF	NF	NF	NF	NF	NF	1.09	3	1438.36	6.67	24.9959
	H	YQQQQPIQQQPQPFPQQPPCSQQQQPPLSQQQQPPF	2xDeamidated [Q]; 1xCarbamidomethyl [C20]	9	48	3	A2IBK1; Q8W3X5; A0A2P1BXV0; V9P785; F8SGM9; A8CA05; F8SGM7; F8SGN9; B8Y0L6	3	4314.03	36	NF	NF	NF	NF	H	H	NF	1.15	3	1438.7	9.47	25.1866
TRUE	Master Protein	A0A0U3AIG6	Low molecular weight glutenin subunit OS=Aegilops speltoides OX=4573 GN=LMW-GS PE=4 SV=1	59.0659	38	1895	3	1	364	41.5	8.15	H	H	H	H	H	H	H	1448.93	38
	Confidence	Sequence	Modifications	# Protein Groups	# Proteins	# PSMs	Master Protein Accessions	# Missed Cleavages	Theo. MH+ [Da]	Sequence Length	Found in Sample Group: 1_AG38Duetto	Found in Sample Group: 5_AG167PI	Found in Sample Group: S_Semola	Found in Sample Group: 4_AG77Neolatino	Found in Sample Group: 3_AG69Lloyd	Found in Sample Group: SI_SemolaIntegrale	Found in Sample Group: 2_AG33Colosseo	XCorr Sequest HT	Charge Sequest HT	m/z [Da] Sequest HT	DeltaM [ppm] Sequest HT	RT [min] Sequest HT
	H	ARSQML		49	270	7	D0F0C5; J9QEK9; D0ES12; B2LWZ2; G0YLZ2; G9AYK6; A0A2P1BXV0; B5A810; C8CCM7; Q6J6V0; R4JFH5; A0A346R8U1; R4JAP5; A9YWM3; D3U329; P93794; J9QFV1; C6K8R8; A0A287EIZ3; F5A7G7; B5A816; Q84NE4; A0A2R4Q9T1; A0A346R8U2; F6KHQ0; R4JB62; D0ES19; B5A813; F1C940; A0A0U3AIG6; Q5XXZ9; D5FPE9; Q9XGF0; A8CA05; Q3YB17; B2LWZ6; A0A346R8T9; Q84U16; T1LG74; A0A346R8T7; A0A2R4Q9V4; A0A346R8T6; A0A089VKK4; Q2L990; A0A…	0	705.371	6	H	NF	H	H	H	H	H	1.23	1	705.37	-1.74	3.2777
	H	CSVNVPVY	1xCarbamidomethyl [C1]	22	93	3	A2IBK1; Q8W3X5; A0A2P1BXV0; Q6J6V0; A0A0U3ANN8; A0A346R8U1; R4JAP5; A9YWM3; D3U329; F8SGM9; A0A2R4Q9T1; R4JB62; D5FPF3; A0A0U3AIG6; C8CCM8; A2IBJ9; D5FPE9; A8CA05; F8SGM7; D5FPF4; Q68VI0; F8SGN9	3	937.445	8	NF	NF	H	NF	H	NF	H	1.18	1	937.444	-0.8	16.9848
	H	DAIRAIIY		25	101	217	A2IBK1; Q8W3X5; A0A2P1BXV0; Q6J6V0; A0A0U3ANN8; R4JAP5; A9YWM3; D5FPF1; D3U329; V9P785; F8SGM9; A0A2R4Q9T1; R4JB62; D5FPF3; A0A0U3AIG6; Q41552; C8CCM8; A2IBJ9; D5FPE9; A8CA05; F8SGM7; D5FPF4; Q68VI0; F8SGN9; B8Y0L6	0	934.536	8	H	H	H	H	H	H	H	2.32	2	467.772	0.44	19.2101
	H	GQWPQQQQVPQGTL		22	88	15	A2IBK1; Q8W3X5; A0A2P1BXV0; Q6J6V0; A0A0U3ANN8; R4JAP5; A9YWM3; D3U329; V9P785; F8SGM9; A0A2R4Q9T1; R4JB62; D5FPF3; A0A0U3AIG6; C8CCM8; A2IBJ9; A8CA05; F8SGM7; D5FPF4; Q68VI0; F8SGN9; B8Y0L6	1	1594.8	14	H	H	H	H	H	H	H	2.49	2	797.901	-1.57	19.641
	H	GQWPQQQQVPQGTLLQPHQIAQL		20	86	3	A2IBK1; Q8W3X5; A0A2P1BXV0; Q6J6V0; A0A0U3ANN8; R4JAP5; A9YWM3; D3U329; V9P785; F8SGM9; A0A2R4Q9T1; R4JB62; D5FPF3; A0A0U3AIG6; C8CCM8; A2IBJ9; A8CA05; D5FPF4; Q68VI0; F8SGN9	3	2623.37	23	NF	NF	NF	H	H	NF	NF	1.39	3	875.128	-1.24	25.9172
	H	LPQQPPFSQQQPPF		11	66	12	Q8W3X5; A0A2P1BXV0; A0A0U3ANN8; A9YWM3; V9P785; F8SGM9; R4JB62; A0A0U3AIG6; F8SGM7; D5FPF4; B8Y0L6	2	1638.83	14	NF	NF	H	H	H	H	H	2.28	2	819.917	-0.39	25.3965
	H	LQPHQLAQL		53	256	324	D0F0C5; K7WV80; A9YRN9; C6K8R4; A0A287EFH8; D0ES12; B2LWZ2; G0YLZ2; G9AYK6; A0A2P1BXV0; Q670S2; B5A810; C8CCM7; Q6J6V0; R4JAP5; A9YWM3; D3U329; P93794; J9QFV1; C6K8R8; A0A287EIZ3; F5A7G7; B5A816; Q84NE4; A0A2R4Q9T1; A0A346R8U2; F6KHQ0; Q40026; R4JB62; Q84U17; B5A813; F1C940; A0A0U3AIG6; Q5XXZ9; C8CCM8; D5FPE9; Q9XGF0; A0A287EFG2; A8CA05; Q3YB17; B2LWZ6; A0A346R8T9; Q84U16; A0A346R8T7; A0A2R4Q9V4;…	2	1047.59	9	H	H	H	H	H	H	H	2.76	2	524.301	1.03	10.8766
	H	PQQPPFSQQQPPFSQQQQPF	1xDeamidated [Q]	1	1	6	A0A0U3AIG6	2	2370.11	20	NF	NF	H	NF	H	NF	NF	1.27	3	790.708	-2.07	20.2282
	H	QPHQLAQL		53	256	14	D0F0C5; K7WV80; A9YRN9; C6K8R4; A0A287EFH8; D0ES12; B2LWZ2; G0YLZ2; G9AYK6; A0A2P1BXV0; Q670S2; B5A810; C8CCM7; Q6J6V0; R4JAP5; A9YWM3; D3U329; P93794; J9QFV1; C6K8R8; A0A287EIZ3; F5A7G7; B5A816; Q84NE4; A0A2R4Q9T1; A0A346R8U2; F6KHQ0; Q40026; R4JB62; Q84U17; B5A813; F1C940; A0A0U3AIG6; Q5XXZ9; C8CCM8; D5FPE9; Q9XGF0; A0A287EFG2; A8CA05; Q3YB17; B2LWZ6; A0A346R8T9; Q84U16; A0A346R8T7; A0A2R4Q9V4;…	1	934.51	8	H	NF	H	H	H	H	H	1.53	2	467.759	0.32	5.8896
	H	QQLNPCKVF	1xCarbamidomethyl [C6]	46	251	287	D0F0C5; K7WV80; N1R0S5; K7WV72; G0YLZ2; G9AYK6; A0A2P1BXV0; I3QPG3; A0A346R8U0; Q6J6V0; R4JFH5; A0A346R8U1; R4JAP5; Q6J6U9; A0A2R4Q9T7; D3U329; R4JFK3; P93794; C6K8R8; A0A287EIZ3; B5A816; Q84NE4; I3QPH1; A0A2R4Q9T1; A0A346R8U2; Q40026; R4JB62; A0A0U3AIG6; D7RFI1; R4JD66; A0A2R4Q9U1; A0A2R4Q9S8; Q9XGF0; A8CA05; Q3YB17; B2LWZ6; A0A346R8T7; A0A2R4Q9V4; A0A346R8T6; A0A089VKK4; A8IEC6; A0A2R4Q9S5; B2L…	1	1133.58	9	H	H	H	H	H	H	H	2.56	2	567.292	0.33	14.0594
	H	QQLNPCKVF	1xGln->pyro-Glu [N-Term]; 1xCarbamidomethyl [C6]	46	250	108	D0F0C5; K7WV80; N1R0S5; K7WV72; G0YLZ2; G9AYK6; A0A2P1BXV0; I3QPG3; A0A346R8U0; Q6J6V0; R4JFH5; A0A346R8U1; R4JAP5; Q6J6U9; A0A2R4Q9T7; D3U329; R4JFK3; P93794; C6K8R8; A0A287EIZ3; B5A816; Q84NE4; I3QPH1; A0A2R4Q9T1; A0A346R8U2; Q40026; R4JB62; A0A0U3AIG6; D7RFI1; R4JD66; A0A2R4Q9U1; A0A2R4Q9S8; Q9XGF0; A8CA05; Q3YB17; B2LWZ6; A0A346R8T7; A0A2R4Q9V4; A0A346R8T6; A0A089VKK4; A8IEC6; A0A2R4Q9S5; B2L…	1	1116.55	9	H	H	H	H	H	H	H	1.47	1	1116.55	0.02	23.8566
	H	QQPQQQQL		26	108	96	G0YLZ2; A2IBK1; Q8W3X5; A0A2P1BXV0; A0A0U3ANN8; Q5XXZ7; R4JAP5; A9YWM3; D5FPF1; V9P785; F8SGM9; R4JB62; D5FPF3; A0A0U3AGE0; A0A0U3AIG6; C8CCM8; A2IBJ9; D5FPE9; A8CA05; F8SGM7; D4HNA5; D5FPF4; F5A7G6; Q68VI0; F8SGN9; B8Y0L6	0	997.506	8	H	H	H	H	H	H	H	2.65	1	997.505	-0.95	3.8091
	H	QQPQQQQL	1xGln->pyro-Glu [N-Term]	25	103	5	G0YLZ2; A2IBK1; Q8W3X5; A0A2P1BXV0; A0A0U3ANN8; Q5XXZ7; R4JAP5; A9YWM3; D5FPF1; V9P785; F8SGM9; R4JB62; D5FPF3; A0A0U3AIG6; C8CCM8; A2IBJ9; D5FPE9; A8CA05; F8SGM7; D4HNA5; D5FPF4; F5A7G6; Q68VI0; F8SGN9; B8Y0L6	0	980.48	8	NF	NF	NF	NF	H	H	H	1.55	2	490.743	-0.23	11.7416
	H	QQQCNPVAMTQSLARSQML	1xGln->pyro-Glu [N-Term]; 1xOxidation [M9]; 1xCarbamidomethyl [C4]	1	1	5	A0A0U3AIG6	1	2190.01	19	H	NF	H	H	H	H	NF	1.2	2	1095.51	2.69	14.6527
	H	SIVLQEQQHGQGF		8	21	16	Q6J6V0; R4JAP5; D5FPF1; D3U329; A0A2R4Q9T1; A0A0U3AIG6; Q41552; Q68VI0	1	1470.73	13	NF	H	NF	NF	NF	NF	NF	2.86	2	735.87	-0.91	13.6015
	H	SQQQPPF		36	253	26	K7WV80; A0A3G3C4J5; K7WV72; B8XU59; P93792; Q8W3X5; A0A2P1BXV0; Q8W3V8; C8CCM7; Q6J6V0; R4JAP5; A9YWM3; D2DII6; D3U329; R4JFK3; R4JDM1; Q5MFK8; I3QPH1; A0A2R4Q9T1; A0A346R8U2; R4JB62; F1C940; A0A0U3AIG6; Q41552; K7XED4; D7RFI1; C8CCM8; F8SGM2; R4JD66; D5FPE9; A8CA05; A0A346R8T9; Q6B780; A0A2R4Q9V4; B2LX00; C6KI73	0	831.4	7	H	H	H	H	H	H	H	1.48	1	831.399	-1.26	10.1053
	H	SQQQQPFPQQQQPL	3xDeamidated [Q]	7	22	4	Q6J6V0; D3U329; A0A2R4Q9T1; I3QPH8; A0A0U3AIG6; Q41552; B8Y0L6	1	1684.78	14	NF	NF	H	NF	NF	NF	NF	1.11	2	842.888	-7.54	5.1621
	H	SQQQQPPF		42	254	83	N1R0S5; A0A165R8I1; A9YRN9; B2LWZ2; A0A0A0R2J7; G9AYK6; A0A2P1BXV0; B5A810; C8CCM7; Q6J6V0; R4JFH5; Q5XXZ7; A9YWM3; Q6J6U9; A0A2R4Q9T7; D3U329; P93794; A0A0A0R2I8; B5A816; Q84NE4; A0A2R4Q9T1; Q2PQJ6; D0ES19; B5A813; A0A0U3AIG6; C8CCM8; D5FPE9; A0A2R4Q9U1; Q9XGF0; A8CA05; B2LWZ6; A0A346R8T9; Q84U16; T1LG74; A0A346R8T7; A0A346R8T6; A0A089VKK4; Q2L990; A0A0A0QYP7; A0A2R4Q9S5; B8XU51; X2JC88	0	959.458	8	H	H	H	H	H	H	H	2.1	2	480.233	-0.32	10.2887
	H	SQQQQQPILL		2	21	21	V9P785; A0A0U3AIG6	1	1182.65	10	NF	NF	H	H	H	H	H	2.37	2	591.827	-0.38	19.7179
	H	SQQQQQPLL		12	67	4	D3UAL8; A0A2P1BXV0; R4JAP5; V9P785; F8SGM9; R4JDM1; D5FPF3; A0A0U3AIG6; D5FPE9; F8SGM7; B2LWZ6; B2Y2R6	1	1069.56	9	NF	NF	NF	H	NF	NF	H	1.12	2	535.286	0.68	11.0239
	H	VHPSIL		36	208	822	I3XHQ0; D3UAL8; H9XGZ9; R9XVA5; A2IBJ7; D5FPE3; D0F0C4; C8CCM7; P06471; A2IBV5; Q0PIV6; A0A287EIZ3; Q8W3W8; R4JDM1; K0I5W1; Q40026; A0A0U3AGE0; A0A0U3AIG6; Q8W3X4; D5FPE9; Q9XGF0; A0A287EFG2; A7XDG0; I6TMW4; I6SJ22; A0A0U2JFU1; A8IEC6; A0A287EFF7; A0A0K2GRQ1; I6SW30; Q0Q2J1; Q8W3X0; A0A287EIW5; B2Y2R6; A8IEB4; A0A0U3ATU4	0	665.398	6	H	H	H	H	H	H	H	1.62	1	665.397	-0.94	7.2207
	H	VHPSILQQLNPCKVF	1xCarbamidomethyl [C12]	24	149	92	D3UAL8; R9XVA5; D5FPE3; C8CCM7; P06471; Q0PIV6; A0A287EIZ3; Q8W3W8; R4JDM1; K0I5W1; Q40026; A0A0U3AIG6; Q8W3X4; D5FPE9; Q9XGF0; A0A287EFG2; A7XDG0; I6TMW4; I6SJ22; I6SW30; Q0Q2J1; Q8W3X0; A0A287EIW5; B2Y2R6	2	1779.96	15	H	H	H	H	H	H	H	4.28	3	593.991	0.51	24.9486
TRUE	Master Protein	A0A2P1BXV0	Low molecular weight glutenin subunit BP4-22 OS=Triticum turgidum subsp. durum OX=4567 GN=GluB3-4 PE=4 SV=1	92.5714	55	1960	1	1	350	39.8	8.66	H	H	H	H	H	H	H	1389.75	55
	Confidence	Sequence	Modifications	# Protein Groups	# Proteins	# PSMs	Master Protein Accessions	# Missed Cleavages	Theo. MH+ [Da]	Sequence Length	Found in Sample Group: 1_AG38Duetto	Found in Sample Group: 5_AG167PI	Found in Sample Group: S_Semola	Found in Sample Group: 4_AG77Neolatino	Found in Sample Group: 3_AG69Lloyd	Found in Sample Group: SI_SemolaIntegrale	Found in Sample Group: 2_AG33Colosseo	XCorr Sequest HT	Charge Sequest HT	m/z [Da] Sequest HT	DeltaM [ppm] Sequest HT	RT [min] Sequest HT
	H	ARSQML		49	270	7	D0F0C5; J9QEK9; D0ES12; B2LWZ2; G0YLZ2; G9AYK6; A0A2P1BXV0; B5A810; C8CCM7; Q6J6V0; R4JFH5; A0A346R8U1; R4JAP5; A9YWM3; D3U329; P93794; J9QFV1; C6K8R8; A0A287EIZ3; F5A7G7; B5A816; Q84NE4; A0A2R4Q9T1; A0A346R8U2; F6KHQ0; R4JB62; D0ES19; B5A813; F1C940; A0A0U3AIG6; Q5XXZ9; D5FPE9; Q9XGF0; A8CA05; Q3YB17; B2LWZ6; A0A346R8T9; Q84U16; T1LG74; A0A346R8T7; A0A2R4Q9V4; A0A346R8T6; A0A089VKK4; Q2L990; A0A…	0	705.371	6	H	NF	H	H	H	H	H	1.23	1	705.37	-1.74	3.2777
	H	CSVNVPVY	1xCarbamidomethyl [C1]	22	93	3	A2IBK1; Q8W3X5; A0A2P1BXV0; Q6J6V0; A0A0U3ANN8; A0A346R8U1; R4JAP5; A9YWM3; D3U329; F8SGM9; A0A2R4Q9T1; R4JB62; D5FPF3; A0A0U3AIG6; C8CCM8; A2IBJ9; D5FPE9; A8CA05; F8SGM7; D5FPF4; Q68VI0; F8SGN9	3	937.445	8	NF	NF	H	NF	H	NF	H	1.18	1	937.444	-0.8	16.9848
	H	DAIRAIIY		25	101	217	A2IBK1; Q8W3X5; A0A2P1BXV0; Q6J6V0; A0A0U3ANN8; R4JAP5; A9YWM3; D5FPF1; D3U329; V9P785; F8SGM9; A0A2R4Q9T1; R4JB62; D5FPF3; A0A0U3AIG6; Q41552; C8CCM8; A2IBJ9; D5FPE9; A8CA05; F8SGM7; D5FPF4; Q68VI0; F8SGN9; B8Y0L6	0	934.536	8	H	H	H	H	H	H	H	2.32	2	467.772	0.44	19.2101
	H	GQWPQQQQVPQGTL		22	88	15	A2IBK1; Q8W3X5; A0A2P1BXV0; Q6J6V0; A0A0U3ANN8; R4JAP5; A9YWM3; D3U329; V9P785; F8SGM9; A0A2R4Q9T1; R4JB62; D5FPF3; A0A0U3AIG6; C8CCM8; A2IBJ9; A8CA05; F8SGM7; D5FPF4; Q68VI0; F8SGN9; B8Y0L6	1	1594.8	14	H	H	H	H	H	H	H	2.49	2	797.901	-1.57	19.641
	H	GQWPQQQQVPQGTLLQPHQIAQL		20	86	3	A2IBK1; Q8W3X5; A0A2P1BXV0; Q6J6V0; A0A0U3ANN8; R4JAP5; A9YWM3; D3U329; V9P785; F8SGM9; A0A2R4Q9T1; R4JB62; D5FPF3; A0A0U3AIG6; C8CCM8; A2IBJ9; A8CA05; D5FPF4; Q68VI0; F8SGN9	3	2623.37	23	NF	NF	NF	H	H	NF	NF	1.39	3	875.128	-1.24	25.9172
	H	GTTTIVPF		12	67	14	Q8W3X5; A0A2P1BXV0; A0A0U3ANN8; F8SGM9; R4JB62; C8CCM8; A2IBJ9; A8CA05; F8SGM7; D5FPF4; Q68VI0; F8SGN9	0	835.456	8	H	H	H	H	H	H	H	1.56	1	835.456	0.58	24.7638
	H	GVGTRVGAY		18	72	20	A2IBK1; Q8W3X5; A0A2P1BXV0; A0A0U3ANN8; R4JAP5; A9YWM3; D5FPF1; D3U329; F8SGM9; R4JB62; D5FPF3; C8CCM8; A2IBJ9; A8CA05; F8SGM7; D5FPF4; F8SGN9; B8Y0L6	0	879.468	9	H	H	H	H	H	H	H	1.63	2	440.237	-1.23	3.9266
	H	LPQQPPFSQQQPPF		11	66	12	Q8W3X5; A0A2P1BXV0; A0A0U3ANN8; A9YWM3; V9P785; F8SGM9; R4JB62; A0A0U3AIG6; F8SGM7; D5FPF4; B8Y0L6	2	1638.83	14	NF	NF	H	H	H	H	H	2.28	2	819.917	-0.39	25.3965
	H	LQPHQLAQL		53	256	324	D0F0C5; K7WV80; A9YRN9; C6K8R4; A0A287EFH8; D0ES12; B2LWZ2; G0YLZ2; G9AYK6; A0A2P1BXV0; Q670S2; B5A810; C8CCM7; Q6J6V0; R4JAP5; A9YWM3; D3U329; P93794; J9QFV1; C6K8R8; A0A287EIZ3; F5A7G7; B5A816; Q84NE4; A0A2R4Q9T1; A0A346R8U2; F6KHQ0; Q40026; R4JB62; Q84U17; B5A813; F1C940; A0A0U3AIG6; Q5XXZ9; C8CCM8; D5FPE9; Q9XGF0; A0A287EFG2; A8CA05; Q3YB17; B2LWZ6; A0A346R8T9; Q84U16; A0A346R8T7; A0A2R4Q9V4;…	2	1047.59	9	H	H	H	H	H	H	H	2.76	2	524.301	1.03	10.8766
	H	LQQQCSPVAMPQSL	1xCarbamidomethyl [C5]	33	198	8	R9XVA5; A2IBK1; Q8W3X5; A0A2P1BXV0; D5FPE3; C8CCM7; Q6J6V0; A2IBV5; A9YWM3; D5FPF1; D3U329; V9P785; F8SGM9; Q8W3W8; R4JDM1; A0A2R4Q9T1; K0I5W1; R4JB62; D5FPF3; A0A0U3AGE0; Q41552; Q8W3X4; C8CCM8; A2IBJ9; A8CA05; F8SGM7; D5FPF4; Q68VI0; F8SGN9; Q8W3X0; B2Y2R6; B8Y0L6; A0A0U3ATU4	1	1586.77	14	NF	NF	H	H	H	H	H	1.9	2	793.886	-1	21.583
	H	NQPQQQQPQQSVQGVSQPQQQQKQL		20	82	21	A2IBK1; Q8W3X5; A0A2P1BXV0; Q6J6V0; A0A0U3ANN8; R4JAP5; A9YWM3; D5FPF1; D3U329; V9P785; F8SGM9; A0A2R4Q9T1; R4JB62; Q41552; C8CCM8; A2IBJ9; A8CA05; F8SGM7; F8SGN9; B8Y0L6	0	2887.44	25	H	H	H	H	H	H	H	2.26	3	963.15	-1.6	7.5568
	H	QPHQLAQL		53	256	14	D0F0C5; K7WV80; A9YRN9; C6K8R4; A0A287EFH8; D0ES12; B2LWZ2; G0YLZ2; G9AYK6; A0A2P1BXV0; Q670S2; B5A810; C8CCM7; Q6J6V0; R4JAP5; A9YWM3; D3U329; P93794; J9QFV1; C6K8R8; A0A287EIZ3; F5A7G7; B5A816; Q84NE4; A0A2R4Q9T1; A0A346R8U2; F6KHQ0; Q40026; R4JB62; Q84U17; B5A813; F1C940; A0A0U3AIG6; Q5XXZ9; C8CCM8; D5FPE9; Q9XGF0; A0A287EFG2; A8CA05; Q3YB17; B2LWZ6; A0A346R8T9; Q84U16; A0A346R8T7; A0A2R4Q9V4;…	1	934.51	8	H	NF	H	H	H	H	H	1.53	2	467.759	0.32	5.8896
	H	QQLNPCKVF	1xCarbamidomethyl [C6]	46	251	287	D0F0C5; K7WV80; N1R0S5; K7WV72; G0YLZ2; G9AYK6; A0A2P1BXV0; I3QPG3; A0A346R8U0; Q6J6V0; R4JFH5; A0A346R8U1; R4JAP5; Q6J6U9; A0A2R4Q9T7; D3U329; R4JFK3; P93794; C6K8R8; A0A287EIZ3; B5A816; Q84NE4; I3QPH1; A0A2R4Q9T1; A0A346R8U2; Q40026; R4JB62; A0A0U3AIG6; D7RFI1; R4JD66; A0A2R4Q9U1; A0A2R4Q9S8; Q9XGF0; A8CA05; Q3YB17; B2LWZ6; A0A346R8T7; A0A2R4Q9V4; A0A346R8T6; A0A089VKK4; A8IEC6; A0A2R4Q9S5; B2L…	1	1133.58	9	H	H	H	H	H	H	H	2.56	2	567.292	0.33	14.0594
	H	QQLNPCKVF	1xGln->pyro-Glu [N-Term]; 1xCarbamidomethyl [C6]	46	250	108	D0F0C5; K7WV80; N1R0S5; K7WV72; G0YLZ2; G9AYK6; A0A2P1BXV0; I3QPG3; A0A346R8U0; Q6J6V0; R4JFH5; A0A346R8U1; R4JAP5; Q6J6U9; A0A2R4Q9T7; D3U329; R4JFK3; P93794; C6K8R8; A0A287EIZ3; B5A816; Q84NE4; I3QPH1; A0A2R4Q9T1; A0A346R8U2; Q40026; R4JB62; A0A0U3AIG6; D7RFI1; R4JD66; A0A2R4Q9U1; A0A2R4Q9S8; Q9XGF0; A8CA05; Q3YB17; B2LWZ6; A0A346R8T7; A0A2R4Q9V4; A0A346R8T6; A0A089VKK4; A8IEC6; A0A2R4Q9S5; B2L…	1	1116.55	9	H	H	H	H	H	H	H	1.47	1	1116.55	0.02	23.8566
	H	QQPQQQQL		26	108	96	G0YLZ2; A2IBK1; Q8W3X5; A0A2P1BXV0; A0A0U3ANN8; Q5XXZ7; R4JAP5; A9YWM3; D5FPF1; V9P785; F8SGM9; R4JB62; D5FPF3; A0A0U3AGE0; A0A0U3AIG6; C8CCM8; A2IBJ9; D5FPE9; A8CA05; F8SGM7; D4HNA5; D5FPF4; F5A7G6; Q68VI0; F8SGN9; B8Y0L6	0	997.506	8	H	H	H	H	H	H	H	2.65	1	997.505	-0.95	3.8091
	H	QQPQQQQL	1xGln->pyro-Glu [N-Term]	25	103	5	G0YLZ2; A2IBK1; Q8W3X5; A0A2P1BXV0; A0A0U3ANN8; Q5XXZ7; R4JAP5; A9YWM3; D5FPF1; V9P785; F8SGM9; R4JB62; D5FPF3; A0A0U3AIG6; C8CCM8; A2IBJ9; D5FPE9; A8CA05; F8SGM7; D4HNA5; D5FPF4; F5A7G6; Q68VI0; F8SGN9; B8Y0L6	0	980.48	8	NF	NF	NF	NF	H	H	H	1.55	2	490.743	-0.23	11.7416
	H	QQQPIPL		17	76	166	A2IBK1; Q8W3X5; A0A2P1BXV0; A0A0U3ANN8; A9YWM3; V9P785; F8SGM9; R4JB62; C8CCM8; A2IBJ9; A8CA05; F8SGM7; A7X9Y0; D5FPF4; Q68VI0; F8SGN9; B8Y0L6	0	823.467	7	H	H	H	H	H	H	H	1.76	1	823.466	-0.9	16.4551
	H	QQQPLPL	1xGln->pyro-Glu [N-Term]	17	76	42	A2IBK1; Q8W3X5; A0A2P1BXV0; A0A0U3ANN8; A9YWM3; V9P785; F8SGM9; R4JB62; C8CCM8; A2IBJ9; A8CA05; F8SGM7; A7X9Y0; D5FPF4; Q68VI0; F8SGN9; B8Y0L6	1	806.441	7	H	NF	H	H	H	H	H	1.05	1	806.44	-0.23	27.8002
	H	QQQPLPLQQILW		17	74	22	A2IBK1; Q8W3X5; A0A2P1BXV0; A0A0U3ANN8; A9YWM3; V9P785; F8SGM9; R4JB62; C8CCM8; A2IBJ9; A8CA05; F8SGM7; A7X9Y0; D5FPF4; Q68VI0; F8SGN9; B8Y0L6	3	1491.83	12	NF	NF	H	H	H	H	H	2.41	2	746.419	-0.73	38.6784
	H	RTLPTM		48	251	45	D0F0C5; N1R0S5; K7WV72; J9QEK9; A9YRN9; C6K8R4; G0YLZ2; A0A2P1BXV0; W8E197; W8E194; I3QPG3; W8E1A2; B5A810; C8CCM7; R4JFH5; Q5XXZ7; R4JAP5; A9YWM3; Q6J6U9; A0A2R4Q9T7; J9QFV1; W8E6H6; H8Y0M0; B5A816; W8E2L7; F6KHQ0; R4JB62; W8E6G7; B5A813; K7XED4; D7RFI1; C8CCM8; W8E0F4; A0A2R4Q9U1; A0A2R4Q9S8; W8E5R1; Q9XGF0; A8CA05; Q84U16; Q6B780; A0A346R8T7; A8IEC6; A0A0K2GRQ1; A0A2R4Q9S5; B6UKQ7; X2JC88; A8I…	1	718.392	6	H	H	H	H	H	H	H	1.27	1	718.39	-2.41	5.4248
	H	RTLPTMCSVNVPVY	1xCarbamidomethyl [C7]	16	71	34	A2IBK1; Q8W3X5; A0A2P1BXV0; A0A0U3ANN8; R4JAP5; A9YWM3; F8SGM9; R4JB62; D5FPF3; C8CCM8; A2IBJ9; A8CA05; F8SGM7; D5FPF4; Q68VI0; F8SGN9	1	1636.82	14	H	H	H	H	H	H	H	2.98	2	818.912	-0.76	21.4662
	H	RTLPTMCSVNVPVY	1xOxidation [M6]; 1xCarbamidomethyl [C7]	16	71	9	A2IBK1; Q8W3X5; A0A2P1BXV0; A0A0U3ANN8; R4JAP5; A9YWM3; F8SGM9; R4JB62; D5FPF3; C8CCM8; A2IBJ9; A8CA05; F8SGM7; D5FPF4; Q68VI0; F8SGN9	1	1652.81	14	H	NF	NF	H	H	NF	H	2.36	2	826.909	-1.08	16.5473
	H	RTLPTMCSVNVPVYGTTTIVPF	1xCarbamidomethyl [C7]	12	65	51	Q8W3X5; A0A2P1BXV0; A0A0U3ANN8; F8SGM9; R4JB62; C8CCM8; A2IBJ9; A8CA05; F8SGM7; D5FPF4; Q68VI0; F8SGN9	2	2453.26	22	H	H	H	H	H	H	H	3.94	2	1227.13	-0.53	32.7605
	H	SIVLQEQQHGQGL		13	73	76	A2IBK1; Q8W3X5; A0A2P1BXV0; A0A0U3ANN8; A9YWM3; V9P785; F8SGM9; R4JB62; C8CCM8; A2IBJ9; A8CA05; F8SGM7; D5FPF4	1	1436.75	13	H	H	H	H	H	H	H	3.2	2	718.878	0.24	12.2673
	H	SIVLQEQQHGQGLNQPQQQQPQQSVQGVSQPQQQQKQL	1xDeamidated [Q]	12	60	7	A2IBK1; Q8W3X5; A0A2P1BXV0; A0A0U3ANN8; A9YWM3; V9P785; F8SGM9; R4JB62; C8CCM8; A2IBJ9; A8CA05; F8SGM7	2	4306.16	38	NF	NF	NF	NF	NF	H	NF	1.02	3	1436.06	-0.21	13.363
	H	SQHQQPVLPQQQIPSVQPSIL		12	68	55	A2IBK1; Q8W3X5; A0A2P1BXV0; V9P785; F8SGM9; R4JB62; A2IBJ9; A8CA05; F8SGM7; D5FPF4; F8SGN9; B8Y0L6	1	2352.27	21	H	H	H	H	H	H	H	4.59	2	1176.64	-0.05	23.8399
	H	SQQQPPF		36	253	26	K7WV80; A0A3G3C4J5; K7WV72; B8XU59; P93792; Q8W3X5; A0A2P1BXV0; Q8W3V8; C8CCM7; Q6J6V0; R4JAP5; A9YWM3; D2DII6; D3U329; R4JFK3; R4JDM1; Q5MFK8; I3QPH1; A0A2R4Q9T1; A0A346R8U2; R4JB62; F1C940; A0A0U3AIG6; Q41552; K7XED4; D7RFI1; C8CCM8; F8SGM2; R4JD66; D5FPE9; A8CA05; A0A346R8T9; Q6B780; A0A2R4Q9V4; B2LX00; C6KI73	0	831.4	7	H	H	H	H	H	H	H	1.48	1	831.399	-1.26	10.1053
	H	SQQQQPPF		42	254	83	N1R0S5; A0A165R8I1; A9YRN9; B2LWZ2; A0A0A0R2J7; G9AYK6; A0A2P1BXV0; B5A810; C8CCM7; Q6J6V0; R4JFH5; Q5XXZ7; A9YWM3; Q6J6U9; A0A2R4Q9T7; D3U329; P93794; A0A0A0R2I8; B5A816; Q84NE4; A0A2R4Q9T1; Q2PQJ6; D0ES19; B5A813; A0A0U3AIG6; C8CCM8; D5FPE9; A0A2R4Q9U1; Q9XGF0; A8CA05; B2LWZ6; A0A346R8T9; Q84U16; T1LG74; A0A346R8T7; A0A346R8T6; A0A089VKK4; Q2L990; A0A0A0QYP7; A0A2R4Q9S5; B8XU51; X2JC88	0	959.458	8	H	H	H	H	H	H	H	2.1	2	480.233	-0.32	10.2887
	H	SQQQQPPFSQQQPPFSQQQQPVL	3xDeamidated [Q]	9	80	10	A2IBK1; Q8W3X5; A0A2P1BXV0; C8CCM7; A0A0U3ANN8; R4JDM1; K0I5W1; D5FPF3; B8Y0L6	3	2683.26	23	NF	H	NF	NF	NF	NF	NF	1.09	3	895.089	-4.45	17.1276
	H	SQQQQPVIPQQPPF		51	229	62	D0F0C5; N1R0S5; C6K8R4; D3UAL8; D0ES12; G0YLZ2; R9XVA5; A2IBK1; Q8W3X5; A0A2P1BXV0; B5TWK5; I3QPG3; Q84U12; D5FPE3; B5A810; C8CCM7; R4JAP5; D5FPF1; Q6J6U9; A0A2R4Q9T7; V9P6P6; C6K8R8; V9P769; Q8W3W8; B5A816; R9XUW0; R4JB62; D5FPF3; A0A0U3AGE0; B5A813; F1C940; Q8W3X4; A2IBJ9; R9YSZ0; F8SGQ2; A0A2R4Q9U1; Q9XGF0; A7XDG0; Q84U16; A7X9Y0; D5FPF4; A0A2R4Q9S5; F5A7G6; F8SGP8; Q68VI0; Q0Q2J1; Q8W3X0; X2J…	0	1621.83	14	H	H	H	H	H	H	H	2.91	2	811.419	-0.97	23.216
	H	SQQQQQFPQQQQPL		9	56	3	A2IBK1; A0A2P1BXV0; A0A0U3ANN8; V9P785; F8SGM9; A2IBJ9; A8CA05; F8SGM7; F8SGN9	1	1712.84	14	NF	NF	NF	H	H	NF	NF	1.65	2	856.92	-1.03	13.6968
	H	SQQQQQPLL		12	67	4	D3UAL8; A0A2P1BXV0; R4JAP5; V9P785; F8SGM9; R4JDM1; D5FPF3; A0A0U3AIG6; D5FPE9; F8SGM7; B2LWZ6; B2Y2R6	1	1069.56	9	NF	NF	NF	H	NF	NF	H	1.12	2	535.286	0.68	11.0239
	H	SQQQQQPLLPQQPPF		8	43	16	D3UAL8; A0A2P1BXV0; R4JAP5; F8SGM9; D5FPF3; D5FPE9; F8SGM7; B2Y2R6	2	1763.91	15	H	NF	NF	H	H	NF	H	1.92	2	882.457	-0.55	24.8687
	H	SQQQQQPLLPQQPPFSQHQQPVLPQQQIPSVQPSIL	1xDeamidated [Q]	3	23	10	A0A2P1BXV0; F8SGM9; F8SGM7	4	4098.14	36	H	NF	NF	NF	NF	NF	NF	1.91	3	1366.73	6.23	29.9976
	H	SQQQQQPPFSQQQQQPIL		4	39	4	A0A2P1BXV0; V9P785; F8SGM9; F8SGM7	2	2138.06	18	NF	NF	NF	NF	H	NF	H	1.58	2	1069.53	-0.67	20.8326
	H	TSLAL		50	1284	464	D0F0C5; K7WV80; N1R0S5; K7WV72; A0A0A9RWM6; D0ES12; M7Z8V3; G9AYK6; A0A368QQ96; A0A2P1BXV0; Q670S2; I1ILT7; A0A0Q3GGG2; Q6J6V0; R4JFH5; A0A287GA23; R4JAP5; J3M5K7; Q6J6U9; A0A2R4Q9T7; M8AHS2; A0A0E0MHA4; D3U329; A0A1E5W740; F2DFY3; B5A816; Q84NE4; A0A0D9ZSX2; M0Y530; A0A0E0JEE4; A0A2R4Q9T1; A0A0D9UX31; R4JB62; A0A0E0L7K0; A0A0E0PGE1; R4JD66; A0A1Z5R643; A0A0E0JER3; A0A2R4Q9U1; A0A2R4Q9S8; Q9XGF0;…	1	504.303	5	H	H	H	H	H	H	H	1.74	1	504.303	-0.29	13.2342
	H	YQQQQPIQQQPQPF		13	65	7	A2IBK1; Q8W3X5; A0A2P1BXV0; V9P785; F8SGM9; R4JB62; A2IBJ9; A8CA05; F8SGM7; A7X9Y0; Q68VI0; F8SGN9; B8Y0L6	1	1757.86	14	NF	NF	H	H	H	NF	H	1.72	2	879.434	-0.44	16.7584
	H	YQQQQPIQQQPQPFPQQPPCSQQQQPPLSQQQQPPF	1xDeamidated [Q]; 1xCarbamidomethyl [C20]	9	48	4	A2IBK1; Q8W3X5; A0A2P1BXV0; V9P785; F8SGM9; A8CA05; F8SGM7; F8SGN9; B8Y0L6	3	4313.05	36	H	NF	NF	NF	NF	NF	NF	1.09	3	1438.36	6.67	24.9959
	H	YQQQQPIQQQPQPFPQQPPCSQQQQPPLSQQQQPPF	2xDeamidated [Q]; 1xCarbamidomethyl [C20]	9	48	3	A2IBK1; Q8W3X5; A0A2P1BXV0; V9P785; F8SGM9; A8CA05; F8SGM7; F8SGN9; B8Y0L6	3	4314.03	36	NF	NF	NF	NF	H	H	NF	1.15	3	1438.7	9.47	25.1866
TRUE	Master Protein	Q84NE4	LMW-glutenin OS=Triticum turgidum subsp. durum OX=4567 GN=Glu-1 PE=4 SV=1	87.1134	54	1602	1	1	388	44.8	8.69	H	H	H	H	H	H	H	1386.33	54
	Confidence	Sequence	Modifications	# Protein Groups	# Proteins	# PSMs	Master Protein Accessions	# Missed Cleavages	Theo. MH+ [Da]	Sequence Length	Found in Sample Group: 1_AG38Duetto	Found in Sample Group: 5_AG167PI	Found in Sample Group: S_Semola	Found in Sample Group: 4_AG77Neolatino	Found in Sample Group: 3_AG69Lloyd	Found in Sample Group: SI_SemolaIntegrale	Found in Sample Group: 2_AG33Colosseo	XCorr Sequest HT	Charge Sequest HT	m/z [Da] Sequest HT	DeltaM [ppm] Sequest HT	RT [min] Sequest HT
	H	AHGTF		21	178	41	Q38L53; G9AYK6; X2J8E3; F1C945; Q5MFH0; R9XUD0; P93794; A0A1U9XLA9; Q84NE4; F1C943; X2JAE7; A0A1D6L3W9; D0ES16; Q9XGF0; Q84U16; Q6QGW0; A0A089VKK4; Q2L990; A0A0A0QYP7; K7R468; Q38L52	0	532.251	5	H	NF	H	H	H	H	H	1.46	1	532.251	-0.49	3.0046
	H	ARSQML		49	270	7	D0F0C5; J9QEK9; D0ES12; B2LWZ2; G0YLZ2; G9AYK6; A0A2P1BXV0; B5A810; C8CCM7; Q6J6V0; R4JFH5; A0A346R8U1; R4JAP5; A9YWM3; D3U329; P93794; J9QFV1; C6K8R8; A0A287EIZ3; F5A7G7; B5A816; Q84NE4; A0A2R4Q9T1; A0A346R8U2; F6KHQ0; R4JB62; D0ES19; B5A813; F1C940; A0A0U3AIG6; Q5XXZ9; D5FPE9; Q9XGF0; A8CA05; Q3YB17; B2LWZ6; A0A346R8T9; Q84U16; T1LG74; A0A346R8T7; A0A2R4Q9V4; A0A346R8T6; A0A089VKK4; Q2L990; A0A…	0	705.371	6	H	NF	H	H	H	H	H	1.23	1	705.37	-1.74	3.2777
	H	GQCVSQPQQQL	1xCarbamidomethyl [C3]	25	134	7	Q38L53; G9AYK6; X2J8E3; F1C945; R9XV91; Q5MFH0; Q38L54; R9XUD0; P93794; A0A1U9XLA9; Q84NE4; F1C943; A0A1G4P206; Q2PQJ6; A0A346R8U2; X2JAE7; D0ES19; D0ES20; R4JB44; Q6QGW0; A2IBV2; Q2L990; K7R468; B2LX00; Q38L52	0	1272.6	11	H	NF	NF	NF	NF	H	H	1.96	2	636.803	-0.45	7.4146
	H	GQCVSQPQQQLQQQL	1xCarbamidomethyl [C3]	24	131	3	Q38L53; G9AYK6; X2J8E3; F1C945; R9XV91; Q5MFH0; Q38L54; R9XUD0; P93794; A0A1U9XLA9; Q84NE4; A0A1G4P206; Q2PQJ6; A0A346R8U2; X2JAE7; D0ES19; D0ES20; R4JB44; Q6QGW0; A2IBV2; Q2L990; K7R468; B2LX00; Q38L52	1	1769.86	15	H	NF	NF	NF	NF	NF	NF	1.69	2	885.433	-0.34	15.8372
	H	GQQPQQQQL		29	250	39	D0F0C5; K7WV80; A0A3G3C4J5; A0A165R8I1; D0ES12; R9XVA5; A0A0A0R2J7; G9AYK6; X2J8E3; R4JFH5; P93794; Q84NE4; R4JDM1; Q5MFK8; Q2PQJ6; A0A346R8U2; D0ES19; F1C940; Q9XGF0; Q3YB17; Q5MFH4; T1LG74; A0A346R8T7; A0A2R4Q9V4; A0A089VKK4; Q2L990; A0A0A0QYP7; B8XU51; B2LX00	0	1054.53	9	H	H	H	H	H	H	H	2.05	1	1054.53	-0.47	3.9132
	H	GVGIGVGVY		17	100	18	Q38L53; A0A0A0R2J7; R9XV91; Q670S2; Q5MFH0; Q38L54; P93794; A0A1U9XLA9; Q84NE4; A0A1G4P206; Q2PQJ6; Q6QGW0; A0A089VKK4; Q2L990; A0A0A0QYP7; K7R468; Q38L52	0	820.456	9	H	NF	NF	H	NF	H	H	1.71	1	820.455	-1.38	21.6236
	H	ISQQQQLPF		6	29	40	G9AYK6; Q5MFH0; Q84NE4; F1C943; D0ES16; Q38L52	1	1088.57	9	NF	H	H	H	H	H	NF	1.98	2	544.79	-0.07	21.3321
	H	LQPHQLAQL		53	256	324	D0F0C5; K7WV80; A9YRN9; C6K8R4; A0A287EFH8; D0ES12; B2LWZ2; G0YLZ2; G9AYK6; A0A2P1BXV0; Q670S2; B5A810; C8CCM7; Q6J6V0; R4JAP5; A9YWM3; D3U329; P93794; J9QFV1; C6K8R8; A0A287EIZ3; F5A7G7; B5A816; Q84NE4; A0A2R4Q9T1; A0A346R8U2; F6KHQ0; Q40026; R4JB62; Q84U17; B5A813; F1C940; A0A0U3AIG6; Q5XXZ9; C8CCM8; D5FPE9; Q9XGF0; A0A287EFG2; A8CA05; Q3YB17; B2LWZ6; A0A346R8T9; Q84U16; A0A346R8T7; A0A2R4Q9V4;…	2	1047.59	9	H	H	H	H	H	H	H	2.76	2	524.301	1.03	10.8766
	H	LQQQCIPVAM	1xCarbamidomethyl [C5]	28	177	32	Q38L53; I3QPH4; A0A0A0R2J7; G9AYK6; X2J8E3; F1C945; R9XV91; Q5MFH0; Q38L54; R4JFH5; R9XUD0; R9YTM4; P93794; A0A1U9XLA9; C6KI71; Q84NE4; F1C943; Q2PQJ6; X2JAE7; D0ES16; R4JB44; Q6QGW0; T1LG74; A0A346R8T7; A0A089VKK4; K7R468; V9P6N2; Q38L52	4	1187.59	10	H	H	H	H	H	H	H	2.03	2	594.299	-0.94	18.9972
	H	QISQQQQPPPF	1xGln->pyro-Glu [N-Term]	10	74	8	A0A0A0R2J7; G9AYK6; Q5MFH0; Q84NE4; F1C943; D0ES16; R4JB44; Q6QGW0; A0A068F8R5; A0A089VKK4	1	1280.63	11	NF	H	H	H	H	NF	NF	1.66	2	640.817	0.5	26.9544
	H	QPHQLAQL		53	256	14	D0F0C5; K7WV80; A9YRN9; C6K8R4; A0A287EFH8; D0ES12; B2LWZ2; G0YLZ2; G9AYK6; A0A2P1BXV0; Q670S2; B5A810; C8CCM7; Q6J6V0; R4JAP5; A9YWM3; D3U329; P93794; J9QFV1; C6K8R8; A0A287EIZ3; F5A7G7; B5A816; Q84NE4; A0A2R4Q9T1; A0A346R8U2; F6KHQ0; Q40026; R4JB62; Q84U17; B5A813; F1C940; A0A0U3AIG6; Q5XXZ9; C8CCM8; D5FPE9; Q9XGF0; A0A287EFG2; A8CA05; Q3YB17; B2LWZ6; A0A346R8T9; Q84U16; A0A346R8T7; A0A2R4Q9V4;…	1	934.51	8	H	NF	H	H	H	H	H	1.53	2	467.759	0.32	5.8896
	H	QQLNPCKVF	1xCarbamidomethyl [C6]	46	251	287	D0F0C5; K7WV80; N1R0S5; K7WV72; G0YLZ2; G9AYK6; A0A2P1BXV0; I3QPG3; A0A346R8U0; Q6J6V0; R4JFH5; A0A346R8U1; R4JAP5; Q6J6U9; A0A2R4Q9T7; D3U329; R4JFK3; P93794; C6K8R8; A0A287EIZ3; B5A816; Q84NE4; I3QPH1; A0A2R4Q9T1; A0A346R8U2; Q40026; R4JB62; A0A0U3AIG6; D7RFI1; R4JD66; A0A2R4Q9U1; A0A2R4Q9S8; Q9XGF0; A8CA05; Q3YB17; B2LWZ6; A0A346R8T7; A0A2R4Q9V4; A0A346R8T6; A0A089VKK4; A8IEC6; A0A2R4Q9S5; B2L…	1	1133.58	9	H	H	H	H	H	H	H	2.56	2	567.292	0.33	14.0594
	H	QQLNPCKVF	1xGln->pyro-Glu [N-Term]; 1xCarbamidomethyl [C6]	46	250	108	D0F0C5; K7WV80; N1R0S5; K7WV72; G0YLZ2; G9AYK6; A0A2P1BXV0; I3QPG3; A0A346R8U0; Q6J6V0; R4JFH5; A0A346R8U1; R4JAP5; Q6J6U9; A0A2R4Q9T7; D3U329; R4JFK3; P93794; C6K8R8; A0A287EIZ3; B5A816; Q84NE4; I3QPH1; A0A2R4Q9T1; A0A346R8U2; Q40026; R4JB62; A0A0U3AIG6; D7RFI1; R4JD66; A0A2R4Q9U1; A0A2R4Q9S8; Q9XGF0; A8CA05; Q3YB17; B2LWZ6; A0A346R8T7; A0A2R4Q9V4; A0A346R8T6; A0A089VKK4; A8IEC6; A0A2R4Q9S5; B2L…	1	1116.55	9	H	H	H	H	H	H	H	1.47	1	1116.55	0.02	23.8566
	H	QQQLGQQPQQQQL	1xGln->pyro-Glu [N-Term]	26	166	3	Q38L53; A0A0A0R2J7; G9AYK6; X2J8E3; F1C945; R9XV91; Q5MFH0; R9XUD0; P93794; A0A1U9XLA9; Q84NE4; A0A1G4P206; Q2PQJ6; A0A346R8U2; X2JAE7; D0ES19; D0ES20; D0ES16; R4JB44; Q6QGW0; A2IBV2; A0A089VKK4; Q2L990; A0A0A0QYP7; B2LX00; Q38L52	1	1534.76	13	H	NF	NF	NF	NF	NF	H	1.21	2	767.885	0.84	18.0764
	H	QQQLGQQPQQQQL		26	166	23	Q38L53; A0A0A0R2J7; G9AYK6; X2J8E3; F1C945; R9XV91; Q5MFH0; R9XUD0; P93794; A0A1U9XLA9; Q84NE4; A0A1G4P206; Q2PQJ6; A0A346R8U2; X2JAE7; D0ES19; D0ES20; D0ES16; R4JB44; Q6QGW0; A2IBV2; A0A089VKK4; Q2L990; A0A0A0QYP7; B2LX00; Q38L52	1	1551.79	13	H	H	H	H	H	H	H	2.97	2	776.396	-1.49	9.8089
	H	QQQPPQQLGQCVSQPQQQL	1xCarbamidomethyl [C11]	7	34	5	G9AYK6; F1C945; Q5MFH0; Q84NE4; F1C943; Q6QGW0; Q38L52	1	2220.08	19	NF	H	H	H	H	NF	NF	1.45	2	1110.54	-0.23	16.2517
	H	QQQPPQQLGQCVSQPQQQLQQQLGQQPQQQQL	1xCarbamidomethyl [C11]	6	32	27	G9AYK6; F1C945; Q5MFH0; Q84NE4; Q6QGW0; Q38L52	3	3752.85	32	NF	H	H	H	H	H	NF	4.15	3	1251.62	0.07	23.1993
	H	QQQQPPFSQQQQPPF		5	12	9	B2LWZ2; Q38L54; Q84NE4; A0A346R8T6; B8XU51	1	1812.87	15	H	NF	NF	NF	NF	H	H	1.87	2	906.936	-0.87	20.8606
	H	QQQQQPPFSQQQQPPFSQQPVISQQQQL	1xGln->pyro-Glu [N-Term]; 1xDeamidated [Q]	1	1	4	Q84NE4	2	3289.59	28	NF	NF	NF	NF	H	NF	NF	1.11	3	1097.21	8.32	13.648
	H	RTLPRMCSVNVPLYETTTSVPL	1xCarbamidomethyl [C7]	5	23	35	G9AYK6; Q84NE4; F1C943; Q6QGW0; Q38L52	3	2534.31	22	NF	H	H	H	H	H	NF	3.62	3	845.441	-0.35	24.8141
	H	RTLPRMCSVNVPLYETTTSVPL	1xOxidation [M6]; 1xCarbamidomethyl [C7]	5	23	3	G9AYK6; Q84NE4; F1C943; Q6QGW0; Q38L52	3	2550.31	22	NF	H	NF	H	NF	NF	NF	1.77	3	850.772	-1.03	24.9503
	H	SIILQQQQQQQQQQQQQQQGQSIIQY		7	30	7	G9AYK6; F1C945; Q5MFH0; Q84NE4; F1C943; Q6QGW0; K7R468	1	3155.58	26	NF	H	H	H	H	NF	NF	2.79	3	1052.53	-0.45	23.1531
	H	SQQPPISQQQQPPF		28	161	10	A0A0A0R2J7; G9AYK6; X2J8E3; F1C945; R9XV91; Q5MFH0; Q38L54; R4JFH5; R9XUD0; R9YTM4; P93794; A0A0A0R2I8; A0A1U9XLA9; C6KI71; Q84NE4; F1C943; A0A1G4P206; Q2PQJ6; X2JAE7; D0ES16; R4JB44; Q6QGW0; T1LG74; A0A089VKK4; A0A0A0QYP7; K7R468; V9P6N2; Q38L52	0	1609.8	14	H	NF	NF	H	NF	H	H	1.32	2	805.401	-0.74	17.0117
	H	SQQPPISQQQQPPFSQQQQPPFSQQQQIPVIHPSVL		17	98	20	G9AYK6; F1C945; R9XV91; Q5MFH0; Q38L54; R4JFH5; A0A1U9XLA9; Q84NE4; F1C943; A0A1G4P206; X2JAE7; D0ES16; R4JB44; Q6QGW0; A0A089VKK4; A0A0A0QYP7; K7R468	2	4105.09	36	H	H	H	H	H	H	H	3.74	3	1369.03	-0.16	28.3134
	H	SQQQQIPVIHPSVL		28	173	108	Q38L53; A0A0A0R2J7; G9AYK6; X2J8E3; F1C945; R9XV91; Q5MFH0; Q38L54; R4JFH5; R9XUD0; R9YTM4; P93794; A0A1U9XLA9; Q84NE4; F1C943; A0A1G4P206; X2JAE7; D0ES19; D0ES20; D0ES16; R4JB44; Q6QGW0; T1LG74; A0A089VKK4; Q2L990; A0A0A0QYP7; K7R468; V9P6N2	0	1573.87	14	H	H	H	H	H	H	H	3.7	2	787.438	-0.3	20.1699
	H	SQQQQPPF		42	254	83	N1R0S5; A0A165R8I1; A9YRN9; B2LWZ2; A0A0A0R2J7; G9AYK6; A0A2P1BXV0; B5A810; C8CCM7; Q6J6V0; R4JFH5; Q5XXZ7; A9YWM3; Q6J6U9; A0A2R4Q9T7; D3U329; P93794; A0A0A0R2I8; B5A816; Q84NE4; A0A2R4Q9T1; Q2PQJ6; D0ES19; B5A813; A0A0U3AIG6; C8CCM8; D5FPE9; A0A2R4Q9U1; Q9XGF0; A8CA05; B2LWZ6; A0A346R8T9; Q84U16; T1LG74; A0A346R8T7; A0A346R8T6; A0A089VKK4; Q2L990; A0A0A0QYP7; A0A2R4Q9S5; B8XU51; X2JC88	0	959.458	8	H	H	H	H	H	H	H	2.1	2	480.233	-0.32	10.2887
	H	SQQQQPPFSQQQQIPVIHPSVL		22	127	39	Q38L53; G9AYK6; F1C945; R9XV91; Q5MFH0; Q38L54; R4JFH5; A0A1U9XLA9; Q84NE4; F1C943; A0A1G4P206; X2JAE7; D0ES19; D0ES20; D0ES16; R4JB44; Q6QGW0; T1LG74; A0A089VKK4; Q2L990; A0A0A0QYP7; K7R468	1	2514.31	22	H	H	H	H	H	H	H	3.15	2	1257.66	0.06	25.1568
	H	SQQQQPPFSQQQQIPVIHPSVL	1xDeamidated [Q]	22	124	4	Q38L53; G9AYK6; F1C945; R9XV91; Q5MFH0; Q38L54; R4JFH5; A0A1U9XLA9; Q84NE4; F1C943; A0A1G4P206; X2JAE7; D0ES19; D0ES20; D0ES16; R4JB44; Q6QGW0; T1LG74; A0A089VKK4; Q2L990; A0A0A0QYP7; K7R468	1	2515.29	22	NF	NF	H	NF	NF	NF	NF	1.07	2	1258.16	9.33	25.1861
	H	SQQQQPPFSQQQQPPF		49	266	54	A0A165R8I1; D3UAL8; B2LWZ2; R9XVA5; A0A0A0R2J7; G9AYK6; X2J8E3; F1C945; R9XV91; Q5MFH0; D5FPE3; B5A810; Q38L54; R4JFH5; A2IBV5; R9XUD0; P93794; A0A0A0R2I8; A0A1U9XLA9; C6KI71; Q8W3W8; Q84NE4; F1C943; A0A1G4P206; Q2PQJ6; X2JAE7; D0ES19; A0A024A269; Q8W3X4; D0ES20; D0ES16; R4JB44; Q9XGF0; A7XDG0; B2LWZ6; Q84U16; Q6QGW0; A0A068F8R5; T1LG74; A0A346R8T6; A0A089VKK4; A0A0A0QYP7; K7R468; B8XU51; V9P6N2;…	1	1899.9	16	H	H	H	H	H	H	H	4	2	950.452	-0.53	20.9553
	H	SQQQQPPFSQQQQSPF		19	141	31	G9AYK6; X2J8E3; Q5MFH0; Q38L54; R9XUD0; A0A0A0R2I8; A0A1U9XLA9; Q84NE4; A0A1G4P206; X2JAE7; D0ES16; R4JB44; Q6QGW0; T1LG74; A0A089VKK4; A0A0A0QYP7; B8XU51; V9P6N2; Q38L52	1	1889.88	16	H	H	H	H	H	H	H	2.9	2	945.442	-1	20.0925
	H	SQQQQPPY		25	148	10	A0A0A0R2J7; G9AYK6; X2J8E3; F1C945; R9XV91; Q5MFH0; Q38L54; R9XUD0; P93794; A0A0A0R2I8; A0A1U9XLA9; Q84NE4; F1C943; A0A1G4P206; Q2PQJ6; D0ES19; D0ES20; D0ES16; R4JB44; Q6QGW0; A0A089VKK4; Q2L990; A0A0A0QYP7; B8XU51; Q38L52	0	975.453	8	H	H	H	H	H	NF	H	1.11	1	975.453	-0.41	4.4971
	H	SQQQQPQFSQQQQPPY		14	93	9	A0A0A0R2J7; G9AYK6; X2J8E3; Q5MFH0; P93794; A0A0A0R2I8; A0A1U9XLA9; Q84NE4; D0ES16; R4JB44; Q6QGW0; A0A089VKK4; A0A0A0QYP7; Q38L52	1	1946.9	16	NF	H	H	H	H	NF	NF	1.54	2	973.953	-0.33	13.8286
	H	SQQQQSPF		27	170	15	A0A0A0R2J7; G9AYK6; X2J8E3; F1C945; Q5MFH0; Q38L54; R9XUD0; A5JJ45; A0A0A0R2I8; A0A1U9XLA9; Q84NE4; F1C943; A0A1G4P206; X2JAE7; D0ES19; D0ES20; D0ES16; R4JB44; Q6QGW0; T1LG74; A0A346R8T7; A0A089VKK4; Q2L990; A0A0A0QYP7; B8XU51; V9P6N2; Q38L52	0	949.437	8	H	H	H	NF	H	H	H	1.32	1	949.436	-1.29	9.0241
	H	TSLAL		50	1284	464	D0F0C5; K7WV80; N1R0S5; K7WV72; A0A0A9RWM6; D0ES12; M7Z8V3; G9AYK6; A0A368QQ96; A0A2P1BXV0; Q670S2; I1ILT7; A0A0Q3GGG2; Q6J6V0; R4JFH5; A0A287GA23; R4JAP5; J3M5K7; Q6J6U9; A0A2R4Q9T7; M8AHS2; A0A0E0MHA4; D3U329; A0A1E5W740; F2DFY3; B5A816; Q84NE4; A0A0D9ZSX2; M0Y530; A0A0E0JEE4; A0A2R4Q9T1; A0A0D9UX31; R4JB62; A0A0E0L7K0; A0A0E0PGE1; R4JD66; A0A1Z5R643; A0A0E0JER3; A0A2R4Q9U1; A0A2R4Q9S8; Q9XGF0;…	1	504.303	5	H	H	H	H	H	H	H	1.74	1	504.303	-0.29	13.2342
TRUE	Master Protein	R4JAP5	Low-molecular-weight glutenin subunit (Fragment) OS=Triticum aestivum OX=4565 GN=LMW-GS PE=4 SV=1	89.7143	49	1652	10	1	350	39.9	8.32	H	H	H	H	H	H	H	1349.85	49
	Confidence	Sequence	Modifications	# Protein Groups	# Proteins	# PSMs	Master Protein Accessions	# Missed Cleavages	Theo. MH+ [Da]	Sequence Length	Found in Sample Group: 1_AG38Duetto	Found in Sample Group: 5_AG167PI	Found in Sample Group: S_Semola	Found in Sample Group: 4_AG77Neolatino	Found in Sample Group: 3_AG69Lloyd	Found in Sample Group: SI_SemolaIntegrale	Found in Sample Group: 2_AG33Colosseo	XCorr Sequest HT	Charge Sequest HT	m/z [Da] Sequest HT	DeltaM [ppm] Sequest HT	RT [min] Sequest HT
	H	ARSQML		49	270	7	D0F0C5; J9QEK9; D0ES12; B2LWZ2; G0YLZ2; G9AYK6; A0A2P1BXV0; B5A810; C8CCM7; Q6J6V0; R4JFH5; A0A346R8U1; R4JAP5; A9YWM3; D3U329; P93794; J9QFV1; C6K8R8; A0A287EIZ3; F5A7G7; B5A816; Q84NE4; A0A2R4Q9T1; A0A346R8U2; F6KHQ0; R4JB62; D0ES19; B5A813; F1C940; A0A0U3AIG6; Q5XXZ9; D5FPE9; Q9XGF0; A8CA05; Q3YB17; B2LWZ6; A0A346R8T9; Q84U16; T1LG74; A0A346R8T7; A0A2R4Q9V4; A0A346R8T6; A0A089VKK4; Q2L990; A0A…	0	705.371	6	H	NF	H	H	H	H	H	1.23	1	705.37	-1.74	3.2777
	H	CSVNVPVY	1xCarbamidomethyl [C1]	22	93	3	A2IBK1; Q8W3X5; A0A2P1BXV0; Q6J6V0; A0A0U3ANN8; A0A346R8U1; R4JAP5; A9YWM3; D3U329; F8SGM9; A0A2R4Q9T1; R4JB62; D5FPF3; A0A0U3AIG6; C8CCM8; A2IBJ9; D5FPE9; A8CA05; F8SGM7; D5FPF4; Q68VI0; F8SGN9	3	937.445	8	NF	NF	H	NF	H	NF	H	1.18	1	937.444	-0.8	16.9848
	H	DAIRAIIY		25	101	217	A2IBK1; Q8W3X5; A0A2P1BXV0; Q6J6V0; A0A0U3ANN8; R4JAP5; A9YWM3; D5FPF1; D3U329; V9P785; F8SGM9; A0A2R4Q9T1; R4JB62; D5FPF3; A0A0U3AIG6; Q41552; C8CCM8; A2IBJ9; D5FPE9; A8CA05; F8SGM7; D5FPF4; Q68VI0; F8SGN9; B8Y0L6	0	934.536	8	H	H	H	H	H	H	H	2.32	2	467.772	0.44	19.2101
	H	GQWPQQQQVPQGTL		22	88	15	A2IBK1; Q8W3X5; A0A2P1BXV0; Q6J6V0; A0A0U3ANN8; R4JAP5; A9YWM3; D3U329; V9P785; F8SGM9; A0A2R4Q9T1; R4JB62; D5FPF3; A0A0U3AIG6; C8CCM8; A2IBJ9; A8CA05; F8SGM7; D5FPF4; Q68VI0; F8SGN9; B8Y0L6	1	1594.8	14	H	H	H	H	H	H	H	2.49	2	797.901	-1.57	19.641
	H	GQWPQQQQVPQGTLLQPHQIAQL		20	86	3	A2IBK1; Q8W3X5; A0A2P1BXV0; Q6J6V0; A0A0U3ANN8; R4JAP5; A9YWM3; D3U329; V9P785; F8SGM9; A0A2R4Q9T1; R4JB62; D5FPF3; A0A0U3AIG6; C8CCM8; A2IBJ9; A8CA05; D5FPF4; Q68VI0; F8SGN9	3	2623.37	23	NF	NF	NF	H	H	NF	NF	1.39	3	875.128	-1.24	25.9172
	H	GVGTRVGAY		18	72	20	A2IBK1; Q8W3X5; A0A2P1BXV0; A0A0U3ANN8; R4JAP5; A9YWM3; D5FPF1; D3U329; F8SGM9; R4JB62; D5FPF3; C8CCM8; A2IBJ9; A8CA05; F8SGM7; D5FPF4; F8SGN9; B8Y0L6	0	879.468	9	H	H	H	H	H	H	H	1.63	2	440.237	-1.23	3.9266
	H	LQPHQLAQL		53	256	324	D0F0C5; K7WV80; A9YRN9; C6K8R4; A0A287EFH8; D0ES12; B2LWZ2; G0YLZ2; G9AYK6; A0A2P1BXV0; Q670S2; B5A810; C8CCM7; Q6J6V0; R4JAP5; A9YWM3; D3U329; P93794; J9QFV1; C6K8R8; A0A287EIZ3; F5A7G7; B5A816; Q84NE4; A0A2R4Q9T1; A0A346R8U2; F6KHQ0; Q40026; R4JB62; Q84U17; B5A813; F1C940; A0A0U3AIG6; Q5XXZ9; C8CCM8; D5FPE9; Q9XGF0; A0A287EFG2; A8CA05; Q3YB17; B2LWZ6; A0A346R8T9; Q84U16; A0A346R8T7; A0A2R4Q9V4;…	2	1047.59	9	H	H	H	H	H	H	H	2.76	2	524.301	1.03	10.8766
	H	LQQQCSPVATPQIL	1xCarbamidomethyl [C5]	1	1	5	R4JAP5	1	1582.83	14	NF	H	NF	NF	NF	NF	NF	2.58	2	791.915	-1.86	22.6769
	H	NQPQQQQPQQSVQGVSQPQQQQKQL		20	82	21	A2IBK1; Q8W3X5; A0A2P1BXV0; Q6J6V0; A0A0U3ANN8; R4JAP5; A9YWM3; D5FPF1; D3U329; V9P785; F8SGM9; A0A2R4Q9T1; R4JB62; Q41552; C8CCM8; A2IBJ9; A8CA05; F8SGM7; F8SGN9; B8Y0L6	0	2887.44	25	H	H	H	H	H	H	H	2.26	3	963.15	-1.6	7.5568
	H	QMETSQIPGLEKPSQQQPLPL	1xGln->pyro-Glu [N-Term]	1	2	3	R4JAP5	4	2332.19	21	NF	H	NF	NF	NF	NF	NF	1.78	2	1166.6	0.74	31.6019
	H	QPHQLAQL		53	256	14	D0F0C5; K7WV80; A9YRN9; C6K8R4; A0A287EFH8; D0ES12; B2LWZ2; G0YLZ2; G9AYK6; A0A2P1BXV0; Q670S2; B5A810; C8CCM7; Q6J6V0; R4JAP5; A9YWM3; D3U329; P93794; J9QFV1; C6K8R8; A0A287EIZ3; F5A7G7; B5A816; Q84NE4; A0A2R4Q9T1; A0A346R8U2; F6KHQ0; Q40026; R4JB62; Q84U17; B5A813; F1C940; A0A0U3AIG6; Q5XXZ9; C8CCM8; D5FPE9; Q9XGF0; A0A287EFG2; A8CA05; Q3YB17; B2LWZ6; A0A346R8T9; Q84U16; A0A346R8T7; A0A2R4Q9V4;…	1	934.51	8	H	NF	H	H	H	H	H	1.53	2	467.759	0.32	5.8896
	H	QQLNPCKVF	1xCarbamidomethyl [C6]	46	251	287	D0F0C5; K7WV80; N1R0S5; K7WV72; G0YLZ2; G9AYK6; A0A2P1BXV0; I3QPG3; A0A346R8U0; Q6J6V0; R4JFH5; A0A346R8U1; R4JAP5; Q6J6U9; A0A2R4Q9T7; D3U329; R4JFK3; P93794; C6K8R8; A0A287EIZ3; B5A816; Q84NE4; I3QPH1; A0A2R4Q9T1; A0A346R8U2; Q40026; R4JB62; A0A0U3AIG6; D7RFI1; R4JD66; A0A2R4Q9U1; A0A2R4Q9S8; Q9XGF0; A8CA05; Q3YB17; B2LWZ6; A0A346R8T7; A0A2R4Q9V4; A0A346R8T6; A0A089VKK4; A8IEC6; A0A2R4Q9S5; B2L…	1	1133.58	9	H	H	H	H	H	H	H	2.56	2	567.292	0.33	14.0594
	H	QQLNPCKVF	1xGln->pyro-Glu [N-Term]; 1xCarbamidomethyl [C6]	46	250	108	D0F0C5; K7WV80; N1R0S5; K7WV72; G0YLZ2; G9AYK6; A0A2P1BXV0; I3QPG3; A0A346R8U0; Q6J6V0; R4JFH5; A0A346R8U1; R4JAP5; Q6J6U9; A0A2R4Q9T7; D3U329; R4JFK3; P93794; C6K8R8; A0A287EIZ3; B5A816; Q84NE4; I3QPH1; A0A2R4Q9T1; A0A346R8U2; Q40026; R4JB62; A0A0U3AIG6; D7RFI1; R4JD66; A0A2R4Q9U1; A0A2R4Q9S8; Q9XGF0; A8CA05; Q3YB17; B2LWZ6; A0A346R8T7; A0A2R4Q9V4; A0A346R8T6; A0A089VKK4; A8IEC6; A0A2R4Q9S5; B2L…	1	1116.55	9	H	H	H	H	H	H	H	1.47	1	1116.55	0.02	23.8566
	H	QQPQQQQL		26	108	96	G0YLZ2; A2IBK1; Q8W3X5; A0A2P1BXV0; A0A0U3ANN8; Q5XXZ7; R4JAP5; A9YWM3; D5FPF1; V9P785; F8SGM9; R4JB62; D5FPF3; A0A0U3AGE0; A0A0U3AIG6; C8CCM8; A2IBJ9; D5FPE9; A8CA05; F8SGM7; D4HNA5; D5FPF4; F5A7G6; Q68VI0; F8SGN9; B8Y0L6	0	997.506	8	H	H	H	H	H	H	H	2.65	1	997.505	-0.95	3.8091
	H	QQPQQQQL	1xGln->pyro-Glu [N-Term]	25	103	5	G0YLZ2; A2IBK1; Q8W3X5; A0A2P1BXV0; A0A0U3ANN8; Q5XXZ7; R4JAP5; A9YWM3; D5FPF1; V9P785; F8SGM9; R4JB62; D5FPF3; A0A0U3AIG6; C8CCM8; A2IBJ9; D5FPE9; A8CA05; F8SGM7; D4HNA5; D5FPF4; F5A7G6; Q68VI0; F8SGN9; B8Y0L6	0	980.48	8	NF	NF	NF	NF	H	H	H	1.55	2	490.743	-0.23	11.7416
	H	QQQCCQQL	2xCarbamidomethyl [C4; C5]	66	374	29	D0F0C5; M7ZW11; K7WV80; N1R0S5; B6UKM2; C6K8R4; A0A287EFH8; D0ES12; Q84M19; E5FF15; W8E194; A0A0N7A5G3; I3QPG3; A0A0K2GSM3; W8E1A2; K7WZA8; P06471; Q6J6V0; R4JFH5; F5A7G9; R4JAP5; H8Y0E0; Q6J6U9; D3U329; A0A024A3B7; R4JFK3; P93794; E3UTY1; Q0PIV6; W8E6H6; A0A287EIZ3; A0A0K2GRS0; H8Y0M0; A0A0N7A547; I3QPH1; A0A2R4Q9T1; C5MQZ6; Q40026; A0A0N7A503; B6UKR2; B6UKQ9; W8E6G7; E5FF35; K7XED4; A0A0N7A522;…	0	1092.46	8	H	H	H	H	H	H	H	1.53	1	1092.45	-1.04	3.8792
	H	RPQQPPFSQQQPPF		1	2	5	R4JAP5	1	1681.84	14	NF	H	NF	NF	NF	NF	NF	2.02	2	841.425	-1.3	16.594
	H	RTLPTM		48	251	45	D0F0C5; N1R0S5; K7WV72; J9QEK9; A9YRN9; C6K8R4; G0YLZ2; A0A2P1BXV0; W8E197; W8E194; I3QPG3; W8E1A2; B5A810; C8CCM7; R4JFH5; Q5XXZ7; R4JAP5; A9YWM3; Q6J6U9; A0A2R4Q9T7; J9QFV1; W8E6H6; H8Y0M0; B5A816; W8E2L7; F6KHQ0; R4JB62; W8E6G7; B5A813; K7XED4; D7RFI1; C8CCM8; W8E0F4; A0A2R4Q9U1; A0A2R4Q9S8; W8E5R1; Q9XGF0; A8CA05; Q84U16; Q6B780; A0A346R8T7; A8IEC6; A0A0K2GRQ1; A0A2R4Q9S5; B6UKQ7; X2JC88; A8I…	1	718.392	6	H	H	H	H	H	H	H	1.27	1	718.39	-2.41	5.4248
	H	RTLPTMCSVNVPVY	1xCarbamidomethyl [C7]	16	71	34	A2IBK1; Q8W3X5; A0A2P1BXV0; A0A0U3ANN8; R4JAP5; A9YWM3; F8SGM9; R4JB62; D5FPF3; C8CCM8; A2IBJ9; A8CA05; F8SGM7; D5FPF4; Q68VI0; F8SGN9	1	1636.82	14	H	H	H	H	H	H	H	2.98	2	818.912	-0.76	21.4662
	H	RTLPTMCSVNVPVY	1xOxidation [M6]; 1xCarbamidomethyl [C7]	16	71	9	A2IBK1; Q8W3X5; A0A2P1BXV0; A0A0U3ANN8; R4JAP5; A9YWM3; F8SGM9; R4JB62; D5FPF3; C8CCM8; A2IBJ9; A8CA05; F8SGM7; D5FPF4; Q68VI0; F8SGN9	1	1652.81	14	H	NF	NF	H	H	NF	H	2.36	2	826.909	-1.08	16.5473
	H	RTLPTMCSVNVPVYGTTTGVPF	1xCarbamidomethyl [C7]	1	1	3	R4JAP5	2	2397.19	22	NF	H	NF	NF	NF	NF	NF	2.71	2	1199.1	-0.19	29.2907
	H	SIVLQEQQHGQGF		8	21	16	Q6J6V0; R4JAP5; D5FPF1; D3U329; A0A2R4Q9T1; A0A0U3AIG6; Q41552; Q68VI0	1	1470.73	13	NF	H	NF	NF	NF	NF	NF	2.86	2	735.87	-0.91	13.6015
	H	SLVL		26	516	93	M8BRJ1; R7WGI5; A0A368PZQ7; R4JAP5; M8BZJ6; K3Z358; K3XEU7; A0A0Q3IJN8; A0A0Q3KLB4; M8B8R6; R4JB62; W5CVZ8; M7ZU95; Q10MA5; N1QPZ3; A0A2K2DNT7; I1IUS5; K3ZQG2; M8CJ64; M8D3W9; M8CQ11; K3XFT2; A0A077RVQ0; Q10PY7; M8APT8; A0A0Q3HS50	1	431.286	4	H	H	H	H	H	H	H	1.36	1	431.286	-0.15	14.8277
	H	SQQQPPF		36	253	26	K7WV80; A0A3G3C4J5; K7WV72; B8XU59; P93792; Q8W3X5; A0A2P1BXV0; Q8W3V8; C8CCM7; Q6J6V0; R4JAP5; A9YWM3; D2DII6; D3U329; R4JFK3; R4JDM1; Q5MFK8; I3QPH1; A0A2R4Q9T1; A0A346R8U2; R4JB62; F1C940; A0A0U3AIG6; Q41552; K7XED4; D7RFI1; C8CCM8; F8SGM2; R4JD66; D5FPE9; A8CA05; A0A346R8T9; Q6B780; A0A2R4Q9V4; B2LX00; C6KI73	0	831.4	7	H	H	H	H	H	H	H	1.48	1	831.399	-1.26	10.1053
	H	SQQQQPVIPQQPPF		51	229	62	D0F0C5; N1R0S5; C6K8R4; D3UAL8; D0ES12; G0YLZ2; R9XVA5; A2IBK1; Q8W3X5; A0A2P1BXV0; B5TWK5; I3QPG3; Q84U12; D5FPE3; B5A810; C8CCM7; R4JAP5; D5FPF1; Q6J6U9; A0A2R4Q9T7; V9P6P6; C6K8R8; V9P769; Q8W3W8; B5A816; R9XUW0; R4JB62; D5FPF3; A0A0U3AGE0; B5A813; F1C940; Q8W3X4; A2IBJ9; R9YSZ0; F8SGQ2; A0A2R4Q9U1; Q9XGF0; A7XDG0; Q84U16; A7X9Y0; D5FPF4; A0A2R4Q9S5; F5A7G6; F8SGP8; Q68VI0; Q0Q2J1; Q8W3X0; X2J…	0	1621.83	14	H	H	H	H	H	H	H	2.91	2	811.419	-0.97	23.216
	H	SQQQQQPLL		12	67	4	D3UAL8; A0A2P1BXV0; R4JAP5; V9P785; F8SGM9; R4JDM1; D5FPF3; A0A0U3AIG6; D5FPE9; F8SGM7; B2LWZ6; B2Y2R6	1	1069.56	9	NF	NF	NF	H	NF	NF	H	1.12	2	535.286	0.68	11.0239
	H	SQQQQQPLLPQQPPF		8	43	16	D3UAL8; A0A2P1BXV0; R4JAP5; F8SGM9; D5FPF3; D5FPE9; F8SGM7; B2Y2R6	2	1763.91	15	H	NF	NF	H	H	NF	H	1.92	2	882.457	-0.55	24.8687
	H	TSLAL		50	1284	464	D0F0C5; K7WV80; N1R0S5; K7WV72; A0A0A9RWM6; D0ES12; M7Z8V3; G9AYK6; A0A368QQ96; A0A2P1BXV0; Q670S2; I1ILT7; A0A0Q3GGG2; Q6J6V0; R4JFH5; A0A287GA23; R4JAP5; J3M5K7; Q6J6U9; A0A2R4Q9T7; M8AHS2; A0A0E0MHA4; D3U329; A0A1E5W740; F2DFY3; B5A816; Q84NE4; A0A0D9ZSX2; M0Y530; A0A0E0JEE4; A0A2R4Q9T1; A0A0D9UX31; R4JB62; A0A0E0L7K0; A0A0E0PGE1; R4JD66; A0A1Z5R643; A0A0E0JER3; A0A2R4Q9U1; A0A2R4Q9S8; Q9XGF0;…	1	504.303	5	H	H	H	H	H	H	H	1.74	1	504.303	-0.29	13.2342
TRUE	Master Protein	D2X6C9	Alpha-gliadin OS=Triticum turgidum subsp. durum OX=4567 PE=4 SV=1	72.6667	38	1286	2	1	300	34.5	7.17	H	H	H	H	H	H	H	1331.69	38
	Confidence	Sequence	Modifications	# Protein Groups	# Proteins	# PSMs	Master Protein Accessions	# Missed Cleavages	Theo. MH+ [Da]	Sequence Length	Found in Sample Group: 1_AG38Duetto	Found in Sample Group: 5_AG167PI	Found in Sample Group: S_Semola	Found in Sample Group: 4_AG77Neolatino	Found in Sample Group: 3_AG69Lloyd	Found in Sample Group: SI_SemolaIntegrale	Found in Sample Group: 2_AG33Colosseo	XCorr Sequest HT	Charge Sequest HT	m/z [Da] Sequest HT	DeltaM [ppm] Sequest HT	RT [min] Sequest HT
	H	ALQTLPAMCNVY	1xCarbamidomethyl [C9]	25	250	84	A0A0E3Z552; G9I1R6; G9I1R5; A0A1P8DT82; A0A1P8DTB0; A0A0E3URC4; G9I1S5; A0A1P8DSN6; A8VZI4; H8Y0G8; D2X6C9; M8AS61; A9YRP1; Q0GK30; A0A1P8DSE3; M4WER7; A9YRP3; I0IT53; A0A0E3UQX9; I0IT57; X2KWD8; A0A1P8DT27; I0IT59; A9Z0K0; A0A0E3Z7K2	2	1380.67	12	H	H	H	H	H	H	H	2.23	2	690.836	-0.04	26.2605
	H	CCQHLW	2xCarbamidomethyl [C1; C2]	18	250	86	A0A1P8DSI8; Q2QL61; A0A0E3UQX3; A0A1P8DT82; M4WFC9; M4WEQ6; H9NAK8; A0A1P8DSH1; A0A1P8DT06; A0A0E3Z5X0; D2X6C9; Q0GK30; A0A1P8DSE3; A0A1P8DSE0; A0A0E3UQX9; A0A1P8DSG6; A0A1P8DT27; A0A0E3Z7K2	1	903.36	6	H	H	H	H	H	H	H	2.2	2	452.184	0.17	9.5908
	H	FGTN		24	250	9	A0A2R2Y432; A0A0E3Z552; U3PUB1; I3RXY0; R9XST5; I3RXV8; G9I1S5; I3RXY2; A0A0E3Z5J4; A7LHC5; A0A2R2Y404; A0A291I1T3; M4WYH4; E0Z2G0; H8Y0D1; A5JSA3; D2X6C9; M8AS61; U3PXH9; Q0GK30; R9XUL8; I3RXW9; E0Z2G8; A0A0E3Z7K2	1	438.198	4	H	H	H	H	H	H	H	1.04	1	438.198	0.3	30.7198
	H	GIFGTN		44	372	134	A0A2R2Y432; A0A1P8DSI8; A0A0E3Z552; G9I1R6; U3PUB1; G9I1R5; I3RXY0; A0A1P8DT82; R9XST5; M4WH49; I3RXV8; A0A1P8DTB0; A0A0E3URC4; G9I1S5; A0A1P8DSN6; I3RXY2; A0A1P8DSH1; A0A0E3Z5J4; A7LHC5; A0A291I1T3; M4WYH4; E0Z2G0; H8Y0D1; A5JSA3; A0A1P8DSY8; F5A7H0; H8Y0E6; D2X6C9; M8AS61; A9YRP1; U3PXH9; Q0GK30; A0A1P8DSE3; M4WER7; R9XUL8; A7LHB8; A0A0E3UQX9; X2L2G3; X2KWD8; I3RXW9; E0Z2G8; A0A1P8DT27; H8Y0E7;…	1	608.304	6	H	H	H	H	H	H	H	1.65	1	608.304	0.47	15.7513
	H	HQQRQQPSSQVSF		4	20	9	A0A1P8DS55; D2X6C9; A5JSB8; X2KWE1	0	1556.76	13	H	H	H	NF	NF	H	NF	1.61	2	778.881	-1.67	3.4823
	H	IGQQQPFPPQQPYPQPQPFPSQQPY		14	259	699	A0A1P8DSI8; A0A1P8DT82; M4WFC9; I3RXV8; Q41533; A0A1P8DT06; A0A023WGB8; A0A0E3URA8; D2X6C9; A0A0K2QJD8; Q0GK30; A0A1P8DSE3; A0A1P8DSG6; R9XU77	3	2922.42	25	H	H	H	H	H	H	H	4.46	2	1461.71	-0.59	26.6583
	H	IHNVVHA		25	251	6	A0A2R2Y432; A0A0E3Z552; U3PUB1; I3RXY0; R9XST5; I3RXV8; I3RXY2; Q2QL52; A0A0E3Z5J4; A7LHC5; A0A2R2Y404; A0A291I1T3; M4WYH4; E0Z2G0; Q2QL42; A5JSA3; D2X6C9; M8AS61; U3PXH9; Q0GK30; R9XUL8; I3RXW9; E0Z2G8; M8ANS4; A0A0E3Z7K2	3	789.437	7	NF	H	NF	NF	NF	NF	NF	1.35	1	789.435	-1.41	2.9342
	H	IPPHCSTTIAPF	1xCarbamidomethyl [C5]	10	67	35	A0A0E3Z552; A0A1P8DTB0; A0A0E3URC4; K7WV47; A0A1P8DS55; A0A0E3URA8; D2X6C9; Q1WA40; A5JSB8; X2KWD8	0	1340.67	12	H	H	H	H	H	H	H	2.5	2	670.836	-1.41	16.1865
	H	LGQQQPFPPQQPY		14	259	9	A0A1P8DSI8; A0A1P8DT82; M4WFC9; I3RXV8; Q41533; M4WEQ6; H9NAK8; A0A1P8DT06; A0A023WGB8; D2X6C9; Q0GK30; A0A1P8DSE3; A0A1P8DSG6; A0A0E3Z7K2	2	1527.76	13	NF	NF	H	NF	H	NF	NF	1.04	2	764.38	-3.74	17.7657
	H	LQIQPF		23	255	99	A0A0E3Z552; I3RXY0; A0A1P8DT82; R9XST5; I3RXV8; A0A0E3URC4; G9I1S5; I3RXY2; Q2QL52; A0A1P8DSH1; A7LHC5; A0A291I1T3; M4WYH4; E0Z2G0; Q2QL42; A5JSA3; D2X6C9; U3PXH9; Q0GK30; A0A1P8DSE3; R9XUL8; E0Z2G8; A0A0E3Z7K2	1	745.424	6	H	H	H	H	NF	H	H	1.47	1	745.424	-0.8	24.676
	H	LQLQPFPQPQLPY		20	250	73	A0A1P8DSI8; I3RXY0; R9XST5; I3RXV8; G9I1S5; I3RXY2; Q2QL52; A0A291I1T3; M4WYH4; E0Z2G0; Q2QL42; D2X6C9; U3PXH9; Q0GK30; A0A1P8DSE3; R9XUL8; A0A1P8DT67; A0A0E3UQX9; E0Z2G8; A0A0E3Z7K2	4	1568.85	13	H	H	H	H	H	H	H	3.49	2	784.927	-0.42	33.5583
	H	QPSQLNPQAQGSVQPQQLPQFAEIRNL		5	48	34	A0A0E3Z552; A0A0E3URC4; A0A1P8DS55; D2X6C9; X2KWD8	3	3016.56	27	H	H	H	H	NF	H	H	5.15	3	1006.19	-1.23	28.3503
	H	QQPQQQYPSSQVSF	1xGln->pyro-Glu [N-Term]	8	54	11	A0A0E3Z552; A0A0E3URC4; K7WV47; D2X6C9; Q1WA40; A5JSB8; X2KWD8; X2KWE1	1	1634.74	14	H	H	H	NF	H	H	H	1.57	2	817.875	-1.25	25.6739
	H	QQPQQQYPSSQVSF		8	54	72	A0A0E3Z552; A0A0E3URC4; K7WV47; D2X6C9; Q1WA40; A5JSB8; X2KWD8; X2KWE1	1	1651.77	14	H	H	H	H	H	H	H	3.68	2	826.388	-1.05	17.6448
	H	QQPQQQYPSSQVSFQPSQLNPQAQGSVQPQQLPQFAEIRNL	2xDeamidated [Q]	4	45	31	A0A0E3Z552; A0A0E3URC4; D2X6C9; X2KWD8	5	4651.28	41	H	NF	H	H	NF	H	NF	1.18	3	1551.11	9.64	31.7597
	H	QQPQQQYPSSQVSFQPSQLNPQAQGSVQPQQLPQFAEIRNL		4	45	8	A0A0E3Z552; A0A0E3URC4; D2X6C9; X2KWD8	5	4649.31	41	H	H	H	NF	NF	H	H	2.89	3	1550.45	2.4	31.9649
	H	QQPQQQYPSSQVSFQPSQLNPQAQGSVQPQQLPQFAEIRNL	1xDeamidated [Q/N]	4	45	9	A0A0E3Z552; A0A0E3URC4; D2X6C9; X2KWD8	5	4650.3	41	H	NF	NF	NF	NF	NF	NF	1.04	3	1550.78	4.61	32.0464
	H	QQQQQQQL		23	248	27	A0A0E3Z552; A0A3B6SPH9; A0A0E3URC4; K7WV47; A0A368RL61; B6TGA9; A0A0A9KA43; M8BZ38; A0A1P8DS55; D2X6C9; Q1WA40; A0A3L6SHE3; Q7F8X1; Q8LJY5; A5JSB8; X2KWE1; A0A1E5VXS1; A0A1D6L835; A0A3B5XY97; A0A3B6ILW0; A0A0E0KKD1; A0A2S3I245; M7Z1H9	0	1028.51	8	H	H	H	H	H	H	H	1.33	1	1028.51	-1.77	3.4334
	H	QTLPAMCNVY	1xCarbamidomethyl [C7]	27	251	5	A0A0E3Z552; G9I1R6; G9I1R5; A0A1P8DT82; A0A1P8DTB0; A0A0E3URC4; G9I1S5; A0A1P8DSN6; A0A1P8DSH1; A8VZI4; A0A1P8DSY8; H8Y0G8; D2X6C9; M8AS61; A9YRP1; Q0GK30; A0A1P8DSE3; M4WER7; A9YRP3; I0IT53; A0A0E3UQX9; I0IT57; X2KWD8; A0A1P8DT27; I0IT59; A9Z0K0; A0A0E3Z7K2	1	1196.54	10	NF	H	H	H	NF	H	NF	1.45	2	598.775	-1	21.3197
	H	RPQQPYPQPQPQY		23	250	136	A0A1P8DSI8; U3PUB1; I3RXY0; A0A1P8DT82; R9XST5; I3RXV8; Q2QL52; A7LHC5; A0A291I1T3; M4WYH4; E0Z2G0; Q2QL42; A5JSA3; D2X6C9; U3PXH9; Q0GK30; A0A1P8DSE3; R9XUL8; A0A0E3UQX9; I3RXX8; I3RXW9; A0A1P8DT27; A0A0E3Z7K2	1	1626.8	13	H	H	H	H	H	H	H	3.18	2	813.904	-1.36	8.8088
	H	SQPQPF		16	253	23	A0A1P8DSI8; Q2QL61; A0A1P8DT82; M4WFC9; Q41533; M4WEQ6; H9NAK8; A0A1P8DT06; A0A023WGB8; A0A0E3Z5X0; D2X6C9; Q0GK30; A0A1P8DSE3; A0A0E3UQX9; A0A1P8DT27; A0A0E3Z7K2	0	703.341	6	H	H	H	H	H	H	H	1.67	1	703.341	-0.21	9.3433
	H	XGQQQPFPPQQPYPQPQPF		13	259	24	A0A1P8DSI8; A0A1P8DT82; M4WFC9; I3RXV8; Q41533; A0A1P8DT06; A0A023WGB8; A0A0E3URA8; D2X6C9; A0A0K2QJD8; Q0GK30; A0A1P8DSE3; A0A1P8DSG6	2	2222.1	19	NF	H	H	NF	H	H	NF	1.6	2	1111.55	-0.59	25.7783
TRUE	Master Protein	A7XDG0	Low-molecular-weight glutenin GLU-B3 OS=Triticum turgidum OX=4571 PE=4 SV=1	64.4628	38	2003	6	1	363	41.2	8.51	H	H	H	H	H	H	H	1284.14	38
	Confidence	Sequence	Modifications	# Protein Groups	# Proteins	# PSMs	Master Protein Accessions	# Missed Cleavages	Theo. MH+ [Da]	Sequence Length	Found in Sample Group: 1_AG38Duetto	Found in Sample Group: 5_AG167PI	Found in Sample Group: S_Semola	Found in Sample Group: 4_AG77Neolatino	Found in Sample Group: 3_AG69Lloyd	Found in Sample Group: SI_SemolaIntegrale	Found in Sample Group: 2_AG33Colosseo	XCorr Sequest HT	Charge Sequest HT	m/z [Da] Sequest HT	DeltaM [ppm] Sequest HT	RT [min] Sequest HT
	H	EAIRAIVY		16	69	218	D3UAL8; B2LWZ2; B5A810; A2IBV5; Q6J6U9; Q8W3W8; Q8W3X4; Q9XGF0; A7XDG0; F6M7E1; B2LWZ6; A0A346R8T9; A0A346R8T6; Q0Q2J1; Q8W3X0; B2Y2R6	0	934.536	8	H	H	H	H	H	H	H	2.52	2	467.771	-0.08	13.5366
	H	PPFSQQLPPFSQQQL		1	3	4	A7XDG0	3	1741.89	15	NF	NF	NF	H	H	NF	NF	1.28	2	871.449	0	30.1869
	H	PPFSQQLPPFSQQQLPPF	2xDeamidated [Q13; Q]	1	3	6	A7XDG0	4	2085.03	18	NF	H	NF	NF	H	NF	H	1.31	2	1043.02	3.16	29.203
	H	PPFSQQLPPFSQQQQPVLPQQPPF	2xDeamidated [Q12; Q13]	7	31	5	D3UAL8; R9XVA5; D5FPE3; Q8W3X4; A7XDG0; Q8W3X0; B2Y2R6	4	2762.38	24	NF	NF	NF	H	H	NF	H	1.37	3	921.466	0.9	27.5927
	H	PPFSQQQQPVLPQQPPFSQQQQSVL	2xDeamidated [Q]	1	1	5	A7XDG0	5	2863.43	25	NF	NF	NF	NF	H	NF	NF	1.13	3	955.144	-3.04	42.549
	H	QMENSHIPGLERPSQQQPLPPQQTL	1xGln->pyro-Glu [N-Term]; 1xDeamidated [N/Q]	10	46	29	R9XVA5; D5FPE3; A2IBV5; Q8W3W8; K0I5W1; Q8W3X4; A7XDG0; Q0Q2J1; Q8W3X0; B2Y2R6	4	2837.39	25	H	NF	H	NF	H	H	NF	1.95	3	946.469	0.94	24.0259
	H	QQQIPF	1xGln->pyro-Glu [N-Term]	20	115	122	A0A1D6PVA1; D3UAL8; A0A1D6PVM1; Q670S2; Q84U12; D5FPE3; A2IBV5; D5FPF1; A0A024A3B7; A0A3L6F0A4; Q8W3W8; Q5XXZ9; Q8W3X4; Q9XGF0; A7XDG0; B6SII5; Q0Q2J1; Q8W3X0; B2Y2R6; A0A0U3ATU4	0	743.372	6	H	H	H	H	H	H	H	1.23	1	743.372	-1	29.9125
	H	QQQLPF		20	115	466	A0A1D6PVA1; D3UAL8; A0A1D6PVM1; Q670S2; Q84U12; D5FPE3; A2IBV5; D5FPF1; A0A024A3B7; A0A3L6F0A4; Q8W3W8; Q5XXZ9; Q8W3X4; Q9XGF0; A7XDG0; B6SII5; Q0Q2J1; Q8W3X0; B2Y2R6; A0A0U3ATU4	1	760.399	6	H	H	H	H	H	H	H	1.53	1	760.399	0.15	17.7289
	H	RTLPTMCNVNVPL	1xCarbamidomethyl [C7]	14	67	116	D0F0C5; A0A0K2GSM3; D5FPE3; R4JFH5; C6KI71; Q8W3W8; Q8W3X4; Q4G3S5; A7XDG0; A0A287EFF7; Q0Q2J1; Q8W3X0; B2Y2R6; J9QGY8	1	1514.78	13	H	NF	H	H	H	H	H	3.7	2	757.894	-0.4	21.5241
	H	RTLPTMCNVNVPL	1xOxidation [M6]; 1xCarbamidomethyl [C7]	14	67	20	D0F0C5; A0A0K2GSM3; D5FPE3; R4JFH5; C6KI71; Q8W3W8; Q8W3X4; Q4G3S5; A7XDG0; A0A287EFF7; Q0Q2J1; Q8W3X0; B2Y2R6; J9QGY8	1	1530.78	13	H	NF	NF	H	H	H	H	2.69	2	765.891	-0.9	15.9942
	H	RTLPTMCNVNVPLY	1xCarbamidomethyl [C7]	13	66	83	D0F0C5; A0A0K2GSM3; D5FPE3; R4JFH5; C6KI71; Q8W3W8; Q8W3X4; Q4G3S5; A7XDG0; Q0Q2J1; Q8W3X0; B2Y2R6; J9QGY8	2	1677.85	14	H	NF	H	H	H	H	H	3.08	2	839.426	-0.56	23.1963
	H	RTLPTMCNVNVPLY	1xOxidation [M6]; 1xCarbamidomethyl [C7]	13	66	7	D0F0C5; A0A0K2GSM3; D5FPE3; R4JFH5; C6KI71; Q8W3W8; Q8W3X4; Q4G3S5; A7XDG0; Q0Q2J1; Q8W3X0; B2Y2R6; J9QGY8	2	1693.84	14	H	NF	NF	H	H	NF	H	1.82	2	847.423	-1.01	18.2575
	H	RTTTRVPF		10	44	59	D3UAL8; D5FPE3; A2IBV5; Q8W3W8; Q8W3X4; Q9XGF0; A7XDG0; Q0Q2J1; Q8W3X0; B2Y2R6	0	977.553	8	H	H	H	H	H	H	H	1.53	2	489.28	-0.34	3.8425
	H	SIILQEQQQVQGSIQTQQQQPQQL	1xDeamidated [Q]	11	56	20	D5FPE3; A2IBV5; Q8W3W8; A0A0U3AGE0; Q8W3X4; Q9XGF0; A7XDG0; Q0Q2J1; Q8W3X0; B2Y2R6; A0A0U3ATU4	1	2779.42	24	H	NF	H	NF	NF	NF	NF	1.27	3	927.151	6.02	23.8626
	H	SIILQEQQQVQGSIQTQQQQPQQL		11	56	84	D5FPE3; A2IBV5; Q8W3W8; A0A0U3AGE0; Q8W3X4; Q9XGF0; A7XDG0; Q0Q2J1; Q8W3X0; B2Y2R6; A0A0U3ATU4	1	2778.44	24	H	H	H	H	H	H	H	5.08	2	1389.72	0.61	24.0527
	H	SQQLPPFSQQQQPVLPQQPPF		8	32	23	D3UAL8; R9XVA5; D5FPE3; Q8W3X4; Q9XGF0; A7XDG0; Q8W3X0; B2Y2R6	3	2419.24	21	H	NF	H	H	H	H	H	1.79	2	1210.12	0.12	30.5488
	H	SQQQLPPF		14	97	16	D3UAL8; R9XVA5; D5FPE3; A2IBV5; R4JDM1; K0I5W1; A0A0U3AGE0; Q8W3X4; Q9XGF0; A7XDG0; Q0Q2J1; Q8W3X0; B2Y2R6; A0A0U3ATU4	1	944.484	8	H	NF	H	H	H	H	H	1.3	1	944.482	-1.97	19.3503
	H	SQQQLPPFSQQLPPF		10	36	54	D3UAL8; R9XVA5; D5FPE3; A2IBV5; Q8W3X4; Q9XGF0; A7XDG0; Q0Q2J1; Q8W3X0; B2Y2R6	3	1741.89	15	H	NF	H	H	H	H	H	1.95	2	871.45	1.33	32.9225
	H	SQQQLPPFSQQLPPFSQQQQPVLPQQPPF		7	31	6	D3UAL8; R9XVA5; D5FPE3; Q8W3X4; A7XDG0; Q8W3X0; B2Y2R6	5	3344.71	29	H	NF	H	H	H	H	NF	1.37	3	1115.57	0.34	36.7654
	H	SQQQQPPFSQQQQPPF		49	266	54	A0A165R8I1; D3UAL8; B2LWZ2; R9XVA5; A0A0A0R2J7; G9AYK6; X2J8E3; F1C945; R9XV91; Q5MFH0; D5FPE3; B5A810; Q38L54; R4JFH5; A2IBV5; R9XUD0; P93794; A0A0A0R2I8; A0A1U9XLA9; C6KI71; Q8W3W8; Q84NE4; F1C943; A0A1G4P206; Q2PQJ6; X2JAE7; D0ES19; A0A024A269; Q8W3X4; D0ES20; D0ES16; R4JB44; Q9XGF0; A7XDG0; B2LWZ6; Q84U16; Q6QGW0; A0A068F8R5; T1LG74; A0A346R8T6; A0A089VKK4; A0A0A0QYP7; K7R468; B8XU51; V9P6N2;…	1	1899.9	16	H	H	H	H	H	H	H	4	2	950.452	-0.53	20.9553
	H	SQQQQPPFSQQQQPVLPQQPSF		10	38	48	D3UAL8; R9XVA5; D5FPE3; A2IBV5; Q8W3X4; Q9XGF0; A7XDG0; Q0Q2J1; Q8W3X0; B2Y2R6	2	2552.25	22	H	H	H	H	H	H	H	3.55	2	1276.63	0.92	25.5605
	H	SQQQQPPFSQQQQPVLPQQPSFSQQQLPPF		10	37	15	D3UAL8; R9XVA5; D5FPE3; A2IBV5; Q8W3X4; Q9XGF0; A7XDG0; Q0Q2J1; Q8W3X0; B2Y2R6	4	3477.72	30	H	NF	H	H	H	NF	H	1.85	3	1159.91	0.7	32.445
	H	SQQQQPVIPQQPPF		51	229	62	D0F0C5; N1R0S5; C6K8R4; D3UAL8; D0ES12; G0YLZ2; R9XVA5; A2IBK1; Q8W3X5; A0A2P1BXV0; B5TWK5; I3QPG3; Q84U12; D5FPE3; B5A810; C8CCM7; R4JAP5; D5FPF1; Q6J6U9; A0A2R4Q9T7; V9P6P6; C6K8R8; V9P769; Q8W3W8; B5A816; R9XUW0; R4JB62; D5FPF3; A0A0U3AGE0; B5A813; F1C940; Q8W3X4; A2IBJ9; R9YSZ0; F8SGQ2; A0A2R4Q9U1; Q9XGF0; A7XDG0; Q84U16; A7X9Y0; D5FPF4; A0A2R4Q9S5; F5A7G6; F8SGP8; Q68VI0; Q0Q2J1; Q8W3X0; X2J…	0	1621.83	14	H	H	H	H	H	H	H	2.91	2	811.419	-0.97	23.216
	H	SQQQQPVIPQQPSFSQQQLPPF		11	91	8	D3UAL8; R9XVA5; D5FPE3; A2IBV5; R4JDM1; Q8W3X4; Q9XGF0; A7XDG0; Q0Q2J1; Q8W3X0; B2Y2R6	2	2537.28	22	H	NF	NF	H	H	NF	H	1.27	2	1269.14	-0.84	30.7325
	H	SQQQQPVLPQQPSF		12	97	58	D3UAL8; R9XVA5; D5FPE3; C8CCM7; A2IBV5; R4JDM1; Q8W3X4; Q9XGF0; A7XDG0; Q0Q2J1; Q8W3X0; B2Y2R6	1	1611.81	14	H	H	H	H	H	H	H	3.4	2	806.409	-0.6	20.9087
	H	VHPSIL		36	208	822	I3XHQ0; D3UAL8; H9XGZ9; R9XVA5; A2IBJ7; D5FPE3; D0F0C4; C8CCM7; P06471; A2IBV5; Q0PIV6; A0A287EIZ3; Q8W3W8; R4JDM1; K0I5W1; Q40026; A0A0U3AGE0; A0A0U3AIG6; Q8W3X4; D5FPE9; Q9XGF0; A0A287EFG2; A7XDG0; I6TMW4; I6SJ22; A0A0U2JFU1; A8IEC6; A0A287EFF7; A0A0K2GRQ1; I6SW30; Q0Q2J1; Q8W3X0; A0A287EIW5; B2Y2R6; A8IEB4; A0A0U3ATU4	0	665.398	6	H	H	H	H	H	H	H	1.62	1	665.397	-0.94	7.2207
	H	VHPSILQQLNPCKVF	1xCarbamidomethyl [C12]	24	149	92	D3UAL8; R9XVA5; D5FPE3; C8CCM7; P06471; Q0PIV6; A0A287EIZ3; Q8W3W8; R4JDM1; K0I5W1; Q40026; A0A0U3AIG6; Q8W3X4; D5FPE9; Q9XGF0; A0A287EFG2; A7XDG0; I6TMW4; I6SJ22; I6SW30; Q0Q2J1; Q8W3X0; A0A287EIW5; B2Y2R6	2	1779.96	15	H	H	H	H	H	H	H	4.28	3	593.991	0.51	24.9486
	H	YRTTTRVPF		10	44	134	D3UAL8; D5FPE3; A2IBV5; Q8W3W8; Q8W3X4; Q9XGF0; A7XDG0; Q0Q2J1; Q8W3X0; B2Y2R6	2	1140.62	9	H	H	H	H	H	H	H	2.34	3	380.877	-0.39	6.8361
TRUE	Master Protein	Q0Q2J1	Low molecular weight glutenin subunit OS=Triticum turgidum OX=4571 GN=lmw-gs PE=4 SV=1	58.982	30	1938	1	1	334	37.9	8.51	H	H	H	H	H	H	H	1280.63	30
	Confidence	Sequence	Modifications	# Protein Groups	# Proteins	# PSMs	Master Protein Accessions	# Missed Cleavages	Theo. MH+ [Da]	Sequence Length	Found in Sample Group: 1_AG38Duetto	Found in Sample Group: 5_AG167PI	Found in Sample Group: S_Semola	Found in Sample Group: 4_AG77Neolatino	Found in Sample Group: 3_AG69Lloyd	Found in Sample Group: SI_SemolaIntegrale	Found in Sample Group: 2_AG33Colosseo	XCorr Sequest HT	Charge Sequest HT	m/z [Da] Sequest HT	DeltaM [ppm] Sequest HT	RT [min] Sequest HT
	H	EAIRAIVY		16	69	218	D3UAL8; B2LWZ2; B5A810; A2IBV5; Q6J6U9; Q8W3W8; Q8W3X4; Q9XGF0; A7XDG0; F6M7E1; B2LWZ6; A0A346R8T9; A0A346R8T6; Q0Q2J1; Q8W3X0; B2Y2R6	0	934.536	8	H	H	H	H	H	H	H	2.52	2	467.771	-0.08	13.5366
	H	PQQPPFSQQQLPPF		5	25	5	R9XVA5; A2IBV5; Q8W3X4; Q0Q2J1; B2Y2R6	2	1638.83	14	H	NF	NF	H	H	H	NF	1.03	2	819.917	-0.02	25.2491
	H	QMENSHIPGLERPSQQQPLPPQQTL	1xGln->pyro-Glu [N-Term]; 1xDeamidated [N/Q]	10	46	29	R9XVA5; D5FPE3; A2IBV5; Q8W3W8; K0I5W1; Q8W3X4; A7XDG0; Q0Q2J1; Q8W3X0; B2Y2R6	4	2837.39	25	H	NF	H	NF	H	H	NF	1.95	3	946.469	0.94	24.0259
	H	QQQIPF	1xGln->pyro-Glu [N-Term]	20	115	122	A0A1D6PVA1; D3UAL8; A0A1D6PVM1; Q670S2; Q84U12; D5FPE3; A2IBV5; D5FPF1; A0A024A3B7; A0A3L6F0A4; Q8W3W8; Q5XXZ9; Q8W3X4; Q9XGF0; A7XDG0; B6SII5; Q0Q2J1; Q8W3X0; B2Y2R6; A0A0U3ATU4	0	743.372	6	H	H	H	H	H	H	H	1.23	1	743.372	-1	29.9125
	H	QQQLPF		20	115	466	A0A1D6PVA1; D3UAL8; A0A1D6PVM1; Q670S2; Q84U12; D5FPE3; A2IBV5; D5FPF1; A0A024A3B7; A0A3L6F0A4; Q8W3W8; Q5XXZ9; Q8W3X4; Q9XGF0; A7XDG0; B6SII5; Q0Q2J1; Q8W3X0; B2Y2R6; A0A0U3ATU4	1	760.399	6	H	H	H	H	H	H	H	1.53	1	760.399	0.15	17.7289
	H	QQQQPPFSQQQQPVLPQQPPF	2xDeamidated [Q]	1	1	12	Q0Q2J1	2	2477.21	21	H	NF	NF	H	NF	NF	NF	1.73	3	826.41	2.49	18.7763
	H	RTLPTMCNVNVPL	1xCarbamidomethyl [C7]	14	67	116	D0F0C5; A0A0K2GSM3; D5FPE3; R4JFH5; C6KI71; Q8W3W8; Q8W3X4; Q4G3S5; A7XDG0; A0A287EFF7; Q0Q2J1; Q8W3X0; B2Y2R6; J9QGY8	1	1514.78	13	H	NF	H	H	H	H	H	3.7	2	757.894	-0.4	21.5241
	H	RTLPTMCNVNVPL	1xOxidation [M6]; 1xCarbamidomethyl [C7]	14	67	20	D0F0C5; A0A0K2GSM3; D5FPE3; R4JFH5; C6KI71; Q8W3W8; Q8W3X4; Q4G3S5; A7XDG0; A0A287EFF7; Q0Q2J1; Q8W3X0; B2Y2R6; J9QGY8	1	1530.78	13	H	NF	NF	H	H	H	H	2.69	2	765.891	-0.9	15.9942
	H	RTLPTMCNVNVPLY	1xCarbamidomethyl [C7]	13	66	83	D0F0C5; A0A0K2GSM3; D5FPE3; R4JFH5; C6KI71; Q8W3W8; Q8W3X4; Q4G3S5; A7XDG0; Q0Q2J1; Q8W3X0; B2Y2R6; J9QGY8	2	1677.85	14	H	NF	H	H	H	H	H	3.08	2	839.426	-0.56	23.1963
	H	RTLPTMCNVNVPLY	1xOxidation [M6]; 1xCarbamidomethyl [C7]	13	66	7	D0F0C5; A0A0K2GSM3; D5FPE3; R4JFH5; C6KI71; Q8W3W8; Q8W3X4; Q4G3S5; A7XDG0; Q0Q2J1; Q8W3X0; B2Y2R6; J9QGY8	2	1693.84	14	H	NF	NF	H	H	NF	H	1.82	2	847.423	-1.01	18.2575
	H	RTTTRVPF		10	44	59	D3UAL8; D5FPE3; A2IBV5; Q8W3W8; Q8W3X4; Q9XGF0; A7XDG0; Q0Q2J1; Q8W3X0; B2Y2R6	0	977.553	8	H	H	H	H	H	H	H	1.53	2	489.28	-0.34	3.8425
	H	SIILQEQQQVQGSIQTQQQQPQQL	1xDeamidated [Q]	11	56	20	D5FPE3; A2IBV5; Q8W3W8; A0A0U3AGE0; Q8W3X4; Q9XGF0; A7XDG0; Q0Q2J1; Q8W3X0; B2Y2R6; A0A0U3ATU4	1	2779.42	24	H	NF	H	NF	NF	NF	NF	1.27	3	927.151	6.02	23.8626
	H	SIILQEQQQVQGSIQTQQQQPQQL		11	56	84	D5FPE3; A2IBV5; Q8W3W8; A0A0U3AGE0; Q8W3X4; Q9XGF0; A7XDG0; Q0Q2J1; Q8W3X0; B2Y2R6; A0A0U3ATU4	1	2778.44	24	H	H	H	H	H	H	H	5.08	2	1389.72	0.61	24.0527
	H	SQQQLPPF		14	97	16	D3UAL8; R9XVA5; D5FPE3; A2IBV5; R4JDM1; K0I5W1; A0A0U3AGE0; Q8W3X4; Q9XGF0; A7XDG0; Q0Q2J1; Q8W3X0; B2Y2R6; A0A0U3ATU4	1	944.484	8	H	NF	H	H	H	H	H	1.3	1	944.482	-1.97	19.3503
	H	SQQQLPPFSQQLPPF		10	36	54	D3UAL8; R9XVA5; D5FPE3; A2IBV5; Q8W3X4; Q9XGF0; A7XDG0; Q0Q2J1; Q8W3X0; B2Y2R6	3	1741.89	15	H	NF	H	H	H	H	H	1.95	2	871.45	1.33	32.9225
	H	SQQQQPPFSQQQQPPF		49	266	54	A0A165R8I1; D3UAL8; B2LWZ2; R9XVA5; A0A0A0R2J7; G9AYK6; X2J8E3; F1C945; R9XV91; Q5MFH0; D5FPE3; B5A810; Q38L54; R4JFH5; A2IBV5; R9XUD0; P93794; A0A0A0R2I8; A0A1U9XLA9; C6KI71; Q8W3W8; Q84NE4; F1C943; A0A1G4P206; Q2PQJ6; X2JAE7; D0ES19; A0A024A269; Q8W3X4; D0ES20; D0ES16; R4JB44; Q9XGF0; A7XDG0; B2LWZ6; Q84U16; Q6QGW0; A0A068F8R5; T1LG74; A0A346R8T6; A0A089VKK4; A0A0A0QYP7; K7R468; B8XU51; V9P6N2;…	1	1899.9	16	H	H	H	H	H	H	H	4	2	950.452	-0.53	20.9553
	H	SQQQQPPFSQQQQPVLPQQPSF		10	38	48	D3UAL8; R9XVA5; D5FPE3; A2IBV5; Q8W3X4; Q9XGF0; A7XDG0; Q0Q2J1; Q8W3X0; B2Y2R6	2	2552.25	22	H	H	H	H	H	H	H	3.55	2	1276.63	0.92	25.5605
	H	SQQQQPPFSQQQQPVLPQQPSFSQQQLPPF		10	37	15	D3UAL8; R9XVA5; D5FPE3; A2IBV5; Q8W3X4; Q9XGF0; A7XDG0; Q0Q2J1; Q8W3X0; B2Y2R6	4	3477.72	30	H	NF	H	H	H	NF	H	1.85	3	1159.91	0.7	32.445
	H	SQQQQPVIPQQPPF		51	229	62	D0F0C5; N1R0S5; C6K8R4; D3UAL8; D0ES12; G0YLZ2; R9XVA5; A2IBK1; Q8W3X5; A0A2P1BXV0; B5TWK5; I3QPG3; Q84U12; D5FPE3; B5A810; C8CCM7; R4JAP5; D5FPF1; Q6J6U9; A0A2R4Q9T7; V9P6P6; C6K8R8; V9P769; Q8W3W8; B5A816; R9XUW0; R4JB62; D5FPF3; A0A0U3AGE0; B5A813; F1C940; Q8W3X4; A2IBJ9; R9YSZ0; F8SGQ2; A0A2R4Q9U1; Q9XGF0; A7XDG0; Q84U16; A7X9Y0; D5FPF4; A0A2R4Q9S5; F5A7G6; F8SGP8; Q68VI0; Q0Q2J1; Q8W3X0; X2J…	0	1621.83	14	H	H	H	H	H	H	H	2.91	2	811.419	-0.97	23.216
	H	SQQQQPVIPQQPSFSQQQLPPF		11	91	8	D3UAL8; R9XVA5; D5FPE3; A2IBV5; R4JDM1; Q8W3X4; Q9XGF0; A7XDG0; Q0Q2J1; Q8W3X0; B2Y2R6	2	2537.28	22	H	NF	NF	H	H	NF	H	1.27	2	1269.14	-0.84	30.7325
	H	SQQQQPVLPQQPPFSQQQLPPF	1xDeamidated [Q]	4	23	8	R9XVA5; Q8W3X4; Q0Q2J1; B2Y2R6	3	2548.28	22	NF	NF	NF	H	H	NF	NF	1.08	2	1274.66	9.08	31.8783
	H	SQQQQPVLPQQPSF		12	97	58	D3UAL8; R9XVA5; D5FPE3; C8CCM7; A2IBV5; R4JDM1; Q8W3X4; Q9XGF0; A7XDG0; Q0Q2J1; Q8W3X0; B2Y2R6	1	1611.81	14	H	H	H	H	H	H	H	3.4	2	806.409	-0.6	20.9087
	H	VHPSIL		36	208	822	I3XHQ0; D3UAL8; H9XGZ9; R9XVA5; A2IBJ7; D5FPE3; D0F0C4; C8CCM7; P06471; A2IBV5; Q0PIV6; A0A287EIZ3; Q8W3W8; R4JDM1; K0I5W1; Q40026; A0A0U3AGE0; A0A0U3AIG6; Q8W3X4; D5FPE9; Q9XGF0; A0A287EFG2; A7XDG0; I6TMW4; I6SJ22; A0A0U2JFU1; A8IEC6; A0A287EFF7; A0A0K2GRQ1; I6SW30; Q0Q2J1; Q8W3X0; A0A287EIW5; B2Y2R6; A8IEB4; A0A0U3ATU4	0	665.398	6	H	H	H	H	H	H	H	1.62	1	665.397	-0.94	7.2207
	H	VHPSILQQLNPCKVF	1xCarbamidomethyl [C12]	24	149	92	D3UAL8; R9XVA5; D5FPE3; C8CCM7; P06471; Q0PIV6; A0A287EIZ3; Q8W3W8; R4JDM1; K0I5W1; Q40026; A0A0U3AIG6; Q8W3X4; D5FPE9; Q9XGF0; A0A287EFG2; A7XDG0; I6TMW4; I6SJ22; I6SW30; Q0Q2J1; Q8W3X0; A0A287EIW5; B2Y2R6	2	1779.96	15	H	H	H	H	H	H	H	4.28	3	593.991	0.51	24.9486
	H	YRTTTRVPF		10	44	134	D3UAL8; D5FPE3; A2IBV5; Q8W3W8; Q8W3X4; Q9XGF0; A7XDG0; Q0Q2J1; Q8W3X0; B2Y2R6	2	1140.62	9	H	H	H	H	H	H	H	2.34	3	380.877	-0.39	6.8361
TRUE	Master Protein	Q0GK30	Omega-gliadin OS=Triticum timopheevii OX=4570 PE=4 SV=1	77.5439	42	1420	5	1	285	32.8	8.03	H	H	H	H	H	H	H	1267.62	42
	Confidence	Sequence	Modifications	# Protein Groups	# Proteins	# PSMs	Master Protein Accessions	# Missed Cleavages	Theo. MH+ [Da]	Sequence Length	Found in Sample Group: 1_AG38Duetto	Found in Sample Group: 5_AG167PI	Found in Sample Group: S_Semola	Found in Sample Group: 4_AG77Neolatino	Found in Sample Group: 3_AG69Lloyd	Found in Sample Group: SI_SemolaIntegrale	Found in Sample Group: 2_AG33Colosseo	XCorr Sequest HT	Charge Sequest HT	m/z [Da] Sequest HT	DeltaM [ppm] Sequest HT	RT [min] Sequest HT
	H	ALQTLPAMCNVY	1xCarbamidomethyl [C9]	25	250	84	A0A0E3Z552; G9I1R6; G9I1R5; A0A1P8DT82; A0A1P8DTB0; A0A0E3URC4; G9I1S5; A0A1P8DSN6; A8VZI4; H8Y0G8; D2X6C9; M8AS61; A9YRP1; Q0GK30; A0A1P8DSE3; M4WER7; A9YRP3; I0IT53; A0A0E3UQX9; I0IT57; X2KWD8; A0A1P8DT27; I0IT59; A9Z0K0; A0A0E3Z7K2	2	1380.67	12	H	H	H	H	H	H	H	2.23	2	690.836	-0.04	26.2605
	H	CCQHLW	2xCarbamidomethyl [C1; C2]	18	250	86	A0A1P8DSI8; Q2QL61; A0A0E3UQX3; A0A1P8DT82; M4WFC9; M4WEQ6; H9NAK8; A0A1P8DSH1; A0A1P8DT06; A0A0E3Z5X0; D2X6C9; Q0GK30; A0A1P8DSE3; A0A1P8DSE0; A0A0E3UQX9; A0A1P8DSG6; A0A1P8DT27; A0A0E3Z7K2	1	903.36	6	H	H	H	H	H	H	H	2.2	2	452.184	0.17	9.5908
	H	CTIAPF	1xCarbamidomethyl [C1]	18	253	140	A0A1P8DSI8; A0A0E3UQX3; M4WFC9; Q41533; M4WEQ6; A0A1P8DSH1; H8Y0D1; A0A1P8DSY8; H8Y0E6; Q0GK30; A0A1P8DSE0; M4WER7; A0A0E3UQX9; A0A1P8DSG6; A0A1P8DT27; H8Y0E7; G9I1R9; A0A0E3Z7K2	0	708.339	6	H	H	H	H	H	H	H	1.84	1	708.338	-0.2	19.4467
	H	FGTN		24	250	9	A0A2R2Y432; A0A0E3Z552; U3PUB1; I3RXY0; R9XST5; I3RXV8; G9I1S5; I3RXY2; A0A0E3Z5J4; A7LHC5; A0A2R2Y404; A0A291I1T3; M4WYH4; E0Z2G0; H8Y0D1; A5JSA3; D2X6C9; M8AS61; U3PXH9; Q0GK30; R9XUL8; I3RXW9; E0Z2G8; A0A0E3Z7K2	1	438.198	4	H	H	H	H	H	H	H	1.04	1	438.198	0.3	30.7198
	H	GIFGTN		44	372	134	A0A2R2Y432; A0A1P8DSI8; A0A0E3Z552; G9I1R6; U3PUB1; G9I1R5; I3RXY0; A0A1P8DT82; R9XST5; M4WH49; I3RXV8; A0A1P8DTB0; A0A0E3URC4; G9I1S5; A0A1P8DSN6; I3RXY2; A0A1P8DSH1; A0A0E3Z5J4; A7LHC5; A0A291I1T3; M4WYH4; E0Z2G0; H8Y0D1; A5JSA3; A0A1P8DSY8; F5A7H0; H8Y0E6; D2X6C9; M8AS61; A9YRP1; U3PXH9; Q0GK30; A0A1P8DSE3; M4WER7; R9XUL8; A7LHB8; A0A0E3UQX9; X2L2G3; X2KWD8; I3RXW9; E0Z2G8; A0A1P8DT27; H8Y0E7;…	1	608.304	6	H	H	H	H	H	H	H	1.65	1	608.304	0.47	15.7513
	H	HQQQKQQQQPSSQVSF		15	195	16	A0A1P8DSI8; A0A1P8DT82; Q9M4L8; Q41533; M4WEQ6; H9NAK8; I0CCD0; A0A1P8DT06; A0A023WGB8; A0A0E3Z5X0; Q0GK30; A0A1P8DSE0; R9XU77; A0A1P8DT27; A0A0E3Z5C7	0	1912.93	16	NF	H	H	H	H	H	H	2.1	2	956.964	-2.52	3.4526
	H	IGQQQPFPPQQPYPQPQPFPSQQPY		14	259	699	A0A1P8DSI8; A0A1P8DT82; M4WFC9; I3RXV8; Q41533; A0A1P8DT06; A0A023WGB8; A0A0E3URA8; D2X6C9; A0A0K2QJD8; Q0GK30; A0A1P8DSE3; A0A1P8DSG6; R9XU77	3	2922.42	25	H	H	H	H	H	H	H	4.46	2	1461.71	-0.59	26.6583
	H	IHNVVHA		25	251	6	A0A2R2Y432; A0A0E3Z552; U3PUB1; I3RXY0; R9XST5; I3RXV8; I3RXY2; Q2QL52; A0A0E3Z5J4; A7LHC5; A0A2R2Y404; A0A291I1T3; M4WYH4; E0Z2G0; Q2QL42; A5JSA3; D2X6C9; M8AS61; U3PXH9; Q0GK30; R9XUL8; I3RXW9; E0Z2G8; M8ANS4; A0A0E3Z7K2	3	789.437	7	NF	H	NF	NF	NF	NF	NF	1.35	1	789.435	-1.41	2.9342
	H	IPPYCTIAPF	1xCarbamidomethyl [C5]	18	250	47	A0A1P8DSI8; A0A0E3UQX3; M4WFC9; Q41533; M4WEQ6; A0A1P8DSH1; H8Y0D1; A0A1P8DSY8; H8Y0E6; Q0GK30; M4WER7; A0A0E3UQX9; A0A1P8DSG6; A0A1P8DT27; H8Y0E7; G9I1R9; R9XSU5; A0A0E3Z7K2	1	1178.59	10	H	H	H	H	H	H	H	2.13	1	1178.59	-0.32	30.4528
	H	LGQQQPFPPQQPY		14	259	9	A0A1P8DSI8; A0A1P8DT82; M4WFC9; I3RXV8; Q41533; M4WEQ6; H9NAK8; A0A1P8DT06; A0A023WGB8; D2X6C9; Q0GK30; A0A1P8DSE3; A0A1P8DSG6; A0A0E3Z7K2	2	1527.76	13	NF	NF	H	NF	H	NF	NF	1.04	2	764.38	-3.74	17.7657
	H	LQIQPF		23	255	99	A0A0E3Z552; I3RXY0; A0A1P8DT82; R9XST5; I3RXV8; A0A0E3URC4; G9I1S5; I3RXY2; Q2QL52; A0A1P8DSH1; A7LHC5; A0A291I1T3; M4WYH4; E0Z2G0; Q2QL42; A5JSA3; D2X6C9; U3PXH9; Q0GK30; A0A1P8DSE3; R9XUL8; E0Z2G8; A0A0E3Z7K2	1	745.424	6	H	H	H	H	NF	H	H	1.47	1	745.424	-0.8	24.676
	H	LQLQPFPQPQLPY		20	250	73	A0A1P8DSI8; I3RXY0; R9XST5; I3RXV8; G9I1S5; I3RXY2; Q2QL52; A0A291I1T3; M4WYH4; E0Z2G0; Q2QL42; D2X6C9; U3PXH9; Q0GK30; A0A1P8DSE3; R9XUL8; A0A1P8DT67; A0A0E3UQX9; E0Z2G8; A0A0E3Z7K2	4	1568.85	13	H	H	H	H	H	H	H	3.49	2	784.927	-0.42	33.5583
	H	QQYPL		19	265	70	A0A1P8DSI8; A0A0E3UQX3; A0A1P8DT82; Q9M4L8; Q41533; M4WEQ6; H9NAK8; I0CCD0; A0A1P8DT06; H8Y0D1; A0A023WGB8; A0A0E3Z5X0; A0A0N7A547; Q0GK30; A0A1P8DSE0; A0A0E3UR88; A0A0D9XG85; R9XU77; A0A1P8DT27	1	648.335	5	H	H	H	H	H	H	H	1.28	1	648.334	-1.52	11.483
	H	QQYPLGQGSF		17	234	30	A0A1P8DSI8; A0A0E3UQX3; A0A1P8DT82; Q9M4L8; Q41533; M4WEQ6; H9NAK8; I0CCD0; A0A1P8DT06; H8Y0D1; A0A023WGB8; A0A0E3Z5X0; Q0GK30; A0A1P8DSE0; A0A0E3UR88; R9XU77; A0A1P8DT27	2	1124.54	10	H	H	H	H	H	H	H	2.19	1	1124.54	-1.4	20.3788
	H	QTLPAMCNVY	1xCarbamidomethyl [C7]	27	251	5	A0A0E3Z552; G9I1R6; G9I1R5; A0A1P8DT82; A0A1P8DTB0; A0A0E3URC4; G9I1S5; A0A1P8DSN6; A0A1P8DSH1; A8VZI4; A0A1P8DSY8; H8Y0G8; D2X6C9; M8AS61; A9YRP1; Q0GK30; A0A1P8DSE3; M4WER7; A9YRP3; I0IT53; A0A0E3UQX9; I0IT57; X2KWD8; A0A1P8DT27; I0IT59; A9Z0K0; A0A0E3Z7K2	1	1196.54	10	NF	H	H	H	NF	H	NF	1.45	2	598.775	-1	21.3197
	H	RPQQPYPQPQPQY		23	250	136	A0A1P8DSI8; U3PUB1; I3RXY0; A0A1P8DT82; R9XST5; I3RXV8; Q2QL52; A7LHC5; A0A291I1T3; M4WYH4; E0Z2G0; Q2QL42; A5JSA3; D2X6C9; U3PXH9; Q0GK30; A0A1P8DSE3; R9XUL8; A0A0E3UQX9; I3RXX8; I3RXW9; A0A1P8DT27; A0A0E3Z7K2	1	1626.8	13	H	H	H	H	H	H	H	3.18	2	813.904	-1.36	8.8088
	H	SQPQPF		16	253	23	A0A1P8DSI8; Q2QL61; A0A1P8DT82; M4WFC9; Q41533; M4WEQ6; H9NAK8; A0A1P8DT06; A0A023WGB8; A0A0E3Z5X0; D2X6C9; Q0GK30; A0A1P8DSE3; A0A0E3UQX9; A0A1P8DT27; A0A0E3Z7K2	0	703.341	6	H	H	H	H	H	H	H	1.67	1	703.341	-0.21	9.3433
	H	VRVPVPQLQPQNPSQQQPQEQVPL		27	253	373	A0A2R2Y432; G9I1R6; I3RXY0; A0A1P8DT82; R9XST5; I3RXV8; A0A1P8DTB0; A0A0E3URC4; A0A0E3URC2; Q41533; Q2QL52; A0A1P8DSH1; A0A0E3Z5J4; A0A291I1T3; M4WYH4; E0Z2G0; Q2QL42; A5JSA3; U3PXH9; Q0GK30; I0IT53; I0IT57; I3RXW9; H8Y0E7; I0IT59; G9I1R9; A0A0E3Z7K2	1	2734.46	24	H	H	H	H	H	H	H	5.68	2	1367.74	-0.2	23.137
	H	XGQQQPFPPQQPYPQPQPF		13	259	24	A0A1P8DSI8; A0A1P8DT82; M4WFC9; I3RXV8; Q41533; A0A1P8DT06; A0A023WGB8; A0A0E3URA8; D2X6C9; A0A0K2QJD8; Q0GK30; A0A1P8DSE3; A0A1P8DSG6	2	2222.1	19	NF	H	H	NF	H	H	NF	1.6	2	1111.55	-0.59	25.7783
	H	XPPY		48	754	523	A0A2R2Y432; A0A1D6PVA1; U3PUB1; I3RXY0; R9XST5; I3RXV8; N1QY29; A0A1D6PVM1; B6SIP3; Q2QW32; A0A1D6KZ84; G9I1S5; A0A1D6HD02; C5YAM7; A0A0Q3EYP3; I3RXY2; Q8H344; A0A0E3Z5J4; A7LHC5; A0A2R2Y404; A0A291I1T3; A0A2K2CRT5; Q0IS09; M4WYH4; E0Z2G0; H8Y0D1; A5JSA3; M8D541; K7VGB7; K7VQS8; M8AS61; A0A194YQ58; U3PXH9; Q0GK30; A0A1D6GM06; R9XUL8; I0IT53; A0A1D6PVH3; I1J1J8; I0IT57; I3RXW9; B6SII5; E0Z2G8; I0I…	0	489.271	4	H	H	H	H	H	H	H	1.33	1	489.271	-0.08	9.3314
TRUE	Master Protein	D0F0C5	Low molecular weight glutenin subunit m3 OS=Aegilops umbellulata OX=4491 GN=LMW-m3 PE=4 SV=1	62.8571	31	1269	2	1	315	35.6	8.34	H	H	H	H	H	H	H	1266.7	31
	Confidence	Sequence	Modifications	# Protein Groups	# Proteins	# PSMs	Master Protein Accessions	# Missed Cleavages	Theo. MH+ [Da]	Sequence Length	Found in Sample Group: 1_AG38Duetto	Found in Sample Group: 5_AG167PI	Found in Sample Group: S_Semola	Found in Sample Group: 4_AG77Neolatino	Found in Sample Group: 3_AG69Lloyd	Found in Sample Group: SI_SemolaIntegrale	Found in Sample Group: 2_AG33Colosseo	XCorr Sequest HT	Charge Sequest HT	m/z [Da] Sequest HT	DeltaM [ppm] Sequest HT	RT [min] Sequest HT
	H	ARSQML		49	270	7	D0F0C5; J9QEK9; D0ES12; B2LWZ2; G0YLZ2; G9AYK6; A0A2P1BXV0; B5A810; C8CCM7; Q6J6V0; R4JFH5; A0A346R8U1; R4JAP5; A9YWM3; D3U329; P93794; J9QFV1; C6K8R8; A0A287EIZ3; F5A7G7; B5A816; Q84NE4; A0A2R4Q9T1; A0A346R8U2; F6KHQ0; R4JB62; D0ES19; B5A813; F1C940; A0A0U3AIG6; Q5XXZ9; D5FPE9; Q9XGF0; A8CA05; Q3YB17; B2LWZ6; A0A346R8T9; Q84U16; T1LG74; A0A346R8T7; A0A2R4Q9V4; A0A346R8T6; A0A089VKK4; Q2L990; A0A…	0	705.371	6	H	NF	H	H	H	H	H	1.23	1	705.37	-1.74	3.2777
	H	GQCVSQPQQQSQQQL	1xCarbamidomethyl [C3]	29	250	20	Q5PU42; D0F0C5; K7WV80; A0A3G3C4J5; Q1ZZT4; A0A165R8I1; C8CCM2; D0ES12; R9XVA5; H6VLQ1; C8CCM7; R4JFH5; A2IBV5; Q0PW08; Q8W3W8; R4JDM1; Q5MFK8; K0I5W1; A0A0U3AGE0; F1C940; H6VLQ3; Q9XGF0; Q3YB17; Q3YB18; Q5MFH4; T1LG74; A0A346R8T7; A0A2R4Q9V4; Q8W3X0	0	1743.81	15	H	NF	H	H	H	H	H	2.8	2	872.408	0.44	5.8298
	H	GQQPQQQQL		29	250	39	D0F0C5; K7WV80; A0A3G3C4J5; A0A165R8I1; D0ES12; R9XVA5; A0A0A0R2J7; G9AYK6; X2J8E3; R4JFH5; P93794; Q84NE4; R4JDM1; Q5MFK8; Q2PQJ6; A0A346R8U2; D0ES19; F1C940; Q9XGF0; Q3YB17; Q5MFH4; T1LG74; A0A346R8T7; A0A2R4Q9V4; A0A089VKK4; Q2L990; A0A0A0QYP7; B8XU51; B2LX00	0	1054.53	9	H	H	H	H	H	H	H	2.05	1	1054.53	-0.47	3.9132
	H	GVGTGVGA		51	250	18	Q5PU42; D0F0C5; K7WV80; A0A3G3C4J5; Q1ZZT4; A0A165R8I1; B8XU59; P93792; D0PX24; C6K8R4; D0ES12; B2LWZ2; G9AYK6; H6VLQ1; I3QPG3; Q8W3V8; B5A810; F4YT76; R4JFH5; A0A346R8U1; D2DII6; Q0PW08; F5A7G7; B5A816; I3QPG6; A0A346R8U2; Q41547; H9XH00; Q84U17; A0A0U3AGE0; B5A813; F1C940; Q5XXZ9; K7XED4; D7RFI1; F8SGM2; R4JD66; I3QPG4; Q9XGF0; Q8H0J4; Q3YB17; B2LWZ6; A0A346R8T9; K7XED9; Q6B780; T1LG74; A0A346R…	0	617.325	8	H	H	H	H	H	H	H	2.13	1	617.325	-0.69	3.6119
	H	GVGTGVGAY		51	250	8	Q5PU42; D0F0C5; K7WV80; A0A3G3C4J5; Q1ZZT4; A0A165R8I1; B8XU59; P93792; D0PX24; C6K8R4; D0ES12; B2LWZ2; G9AYK6; H6VLQ1; I3QPG3; Q8W3V8; B5A810; F4YT76; R4JFH5; A0A346R8U1; D2DII6; Q0PW08; F5A7G7; B5A816; I3QPG6; A0A346R8U2; Q41547; H9XH00; Q84U17; A0A0U3AGE0; B5A813; F1C940; Q5XXZ9; K7XED4; D7RFI1; F8SGM2; R4JD66; I3QPG4; Q9XGF0; Q8H0J4; Q3YB17; B2LWZ6; A0A346R8T9; K7XED9; Q6B780; T1LG74; A0A346R…	0	780.389	9	H	NF	H	H	H	NF	NF	1.63	1	780.388	-0.51	10.1166
	H	LQPHQLAQL		53	256	324	D0F0C5; K7WV80; A9YRN9; C6K8R4; A0A287EFH8; D0ES12; B2LWZ2; G0YLZ2; G9AYK6; A0A2P1BXV0; Q670S2; B5A810; C8CCM7; Q6J6V0; R4JAP5; A9YWM3; D3U329; P93794; J9QFV1; C6K8R8; A0A287EIZ3; F5A7G7; B5A816; Q84NE4; A0A2R4Q9T1; A0A346R8U2; F6KHQ0; Q40026; R4JB62; Q84U17; B5A813; F1C940; A0A0U3AIG6; Q5XXZ9; C8CCM8; D5FPE9; Q9XGF0; A0A287EFG2; A8CA05; Q3YB17; B2LWZ6; A0A346R8T9; Q84U16; A0A346R8T7; A0A2R4Q9V4;…	2	1047.59	9	H	H	H	H	H	H	H	2.76	2	524.301	1.03	10.8766
	H	QPHQLAQL		53	256	14	D0F0C5; K7WV80; A9YRN9; C6K8R4; A0A287EFH8; D0ES12; B2LWZ2; G0YLZ2; G9AYK6; A0A2P1BXV0; Q670S2; B5A810; C8CCM7; Q6J6V0; R4JAP5; A9YWM3; D3U329; P93794; J9QFV1; C6K8R8; A0A287EIZ3; F5A7G7; B5A816; Q84NE4; A0A2R4Q9T1; A0A346R8U2; F6KHQ0; Q40026; R4JB62; Q84U17; B5A813; F1C940; A0A0U3AIG6; Q5XXZ9; C8CCM8; D5FPE9; Q9XGF0; A0A287EFG2; A8CA05; Q3YB17; B2LWZ6; A0A346R8T9; Q84U16; A0A346R8T7; A0A2R4Q9V4;…	1	934.51	8	H	NF	H	H	H	H	H	1.53	2	467.759	0.32	5.8896
	H	QQLNPCKVF	1xCarbamidomethyl [C6]	46	251	287	D0F0C5; K7WV80; N1R0S5; K7WV72; G0YLZ2; G9AYK6; A0A2P1BXV0; I3QPG3; A0A346R8U0; Q6J6V0; R4JFH5; A0A346R8U1; R4JAP5; Q6J6U9; A0A2R4Q9T7; D3U329; R4JFK3; P93794; C6K8R8; A0A287EIZ3; B5A816; Q84NE4; I3QPH1; A0A2R4Q9T1; A0A346R8U2; Q40026; R4JB62; A0A0U3AIG6; D7RFI1; R4JD66; A0A2R4Q9U1; A0A2R4Q9S8; Q9XGF0; A8CA05; Q3YB17; B2LWZ6; A0A346R8T7; A0A2R4Q9V4; A0A346R8T6; A0A089VKK4; A8IEC6; A0A2R4Q9S5; B2L…	1	1133.58	9	H	H	H	H	H	H	H	2.56	2	567.292	0.33	14.0594
	H	QQLNPCKVF	1xGln->pyro-Glu [N-Term]; 1xCarbamidomethyl [C6]	46	250	108	D0F0C5; K7WV80; N1R0S5; K7WV72; G0YLZ2; G9AYK6; A0A2P1BXV0; I3QPG3; A0A346R8U0; Q6J6V0; R4JFH5; A0A346R8U1; R4JAP5; Q6J6U9; A0A2R4Q9T7; D3U329; R4JFK3; P93794; C6K8R8; A0A287EIZ3; B5A816; Q84NE4; I3QPH1; A0A2R4Q9T1; A0A346R8U2; Q40026; R4JB62; A0A0U3AIG6; D7RFI1; R4JD66; A0A2R4Q9U1; A0A2R4Q9S8; Q9XGF0; A8CA05; Q3YB17; B2LWZ6; A0A346R8T7; A0A2R4Q9V4; A0A346R8T6; A0A089VKK4; A8IEC6; A0A2R4Q9S5; B2L…	1	1116.55	9	H	H	H	H	H	H	H	1.47	1	1116.55	0.02	23.8566
	H	QQQCCQQL	2xCarbamidomethyl [C4; C5]	66	374	29	D0F0C5; M7ZW11; K7WV80; N1R0S5; B6UKM2; C6K8R4; A0A287EFH8; D0ES12; Q84M19; E5FF15; W8E194; A0A0N7A5G3; I3QPG3; A0A0K2GSM3; W8E1A2; K7WZA8; P06471; Q6J6V0; R4JFH5; F5A7G9; R4JAP5; H8Y0E0; Q6J6U9; D3U329; A0A024A3B7; R4JFK3; P93794; E3UTY1; Q0PIV6; W8E6H6; A0A287EIZ3; A0A0K2GRS0; H8Y0M0; A0A0N7A547; I3QPH1; A0A2R4Q9T1; C5MQZ6; Q40026; A0A0N7A503; B6UKR2; B6UKQ9; W8E6G7; E5FF35; K7XED4; A0A0N7A522;…	0	1092.46	8	H	H	H	H	H	H	H	1.53	1	1092.45	-1.04	3.8792
	H	RTLPTM		48	251	45	D0F0C5; N1R0S5; K7WV72; J9QEK9; A9YRN9; C6K8R4; G0YLZ2; A0A2P1BXV0; W8E197; W8E194; I3QPG3; W8E1A2; B5A810; C8CCM7; R4JFH5; Q5XXZ7; R4JAP5; A9YWM3; Q6J6U9; A0A2R4Q9T7; J9QFV1; W8E6H6; H8Y0M0; B5A816; W8E2L7; F6KHQ0; R4JB62; W8E6G7; B5A813; K7XED4; D7RFI1; C8CCM8; W8E0F4; A0A2R4Q9U1; A0A2R4Q9S8; W8E5R1; Q9XGF0; A8CA05; Q84U16; Q6B780; A0A346R8T7; A8IEC6; A0A0K2GRQ1; A0A2R4Q9S5; B6UKQ7; X2JC88; A8I…	1	718.392	6	H	H	H	H	H	H	H	1.27	1	718.39	-2.41	5.4248
	H	RTLPTMCNVNVPL	1xCarbamidomethyl [C7]	14	67	116	D0F0C5; A0A0K2GSM3; D5FPE3; R4JFH5; C6KI71; Q8W3W8; Q8W3X4; Q4G3S5; A7XDG0; A0A287EFF7; Q0Q2J1; Q8W3X0; B2Y2R6; J9QGY8	1	1514.78	13	H	NF	H	H	H	H	H	3.7	2	757.894	-0.4	21.5241
	H	RTLPTMCNVNVPL	1xOxidation [M6]; 1xCarbamidomethyl [C7]	14	67	20	D0F0C5; A0A0K2GSM3; D5FPE3; R4JFH5; C6KI71; Q8W3W8; Q8W3X4; Q4G3S5; A7XDG0; A0A287EFF7; Q0Q2J1; Q8W3X0; B2Y2R6; J9QGY8	1	1530.78	13	H	NF	NF	H	H	H	H	2.69	2	765.891	-0.9	15.9942
	H	RTLPTMCNVNVPLY	1xCarbamidomethyl [C7]	13	66	83	D0F0C5; A0A0K2GSM3; D5FPE3; R4JFH5; C6KI71; Q8W3W8; Q8W3X4; Q4G3S5; A7XDG0; Q0Q2J1; Q8W3X0; B2Y2R6; J9QGY8	2	1677.85	14	H	NF	H	H	H	H	H	3.08	2	839.426	-0.56	23.1963
	H	RTLPTMCNVNVPLY	1xOxidation [M6]; 1xCarbamidomethyl [C7]	13	66	7	D0F0C5; A0A0K2GSM3; D5FPE3; R4JFH5; C6KI71; Q8W3W8; Q8W3X4; Q4G3S5; A7XDG0; Q0Q2J1; Q8W3X0; B2Y2R6; J9QGY8	2	1693.84	14	H	NF	NF	H	H	NF	H	1.82	2	847.423	-1.01	18.2575
	H	SQQQQPVIPQQPPF		51	229	62	D0F0C5; N1R0S5; C6K8R4; D3UAL8; D0ES12; G0YLZ2; R9XVA5; A2IBK1; Q8W3X5; A0A2P1BXV0; B5TWK5; I3QPG3; Q84U12; D5FPE3; B5A810; C8CCM7; R4JAP5; D5FPF1; Q6J6U9; A0A2R4Q9T7; V9P6P6; C6K8R8; V9P769; Q8W3W8; B5A816; R9XUW0; R4JB62; D5FPF3; A0A0U3AGE0; B5A813; F1C940; Q8W3X4; A2IBJ9; R9YSZ0; F8SGQ2; A0A2R4Q9U1; Q9XGF0; A7XDG0; Q84U16; A7X9Y0; D5FPF4; A0A2R4Q9S5; F5A7G6; F8SGP8; Q68VI0; Q0Q2J1; Q8W3X0; X2J…	0	1621.83	14	H	H	H	H	H	H	H	2.91	2	811.419	-0.97	23.216
	H	TSLAL		50	1284	464	D0F0C5; K7WV80; N1R0S5; K7WV72; A0A0A9RWM6; D0ES12; M7Z8V3; G9AYK6; A0A368QQ96; A0A2P1BXV0; Q670S2; I1ILT7; A0A0Q3GGG2; Q6J6V0; R4JFH5; A0A287GA23; R4JAP5; J3M5K7; Q6J6U9; A0A2R4Q9T7; M8AHS2; A0A0E0MHA4; D3U329; A0A1E5W740; F2DFY3; B5A816; Q84NE4; A0A0D9ZSX2; M0Y530; A0A0E0JEE4; A0A2R4Q9T1; A0A0D9UX31; R4JB62; A0A0E0L7K0; A0A0E0PGE1; R4JD66; A0A1Z5R643; A0A0E0JER3; A0A2R4Q9U1; A0A2R4Q9S8; Q9XGF0;…	1	504.303	5	H	H	H	H	H	H	H	1.74	1	504.303	-0.29	13.2342
TRUE	Master Protein	A2IBJ9	LMW-m1 glutenin subunit OS=Triticum dicoccoides OX=85692 GN=LMW-m1 PE=4 SV=1	82.8571	37	1305	2	1	350	39.9	8.32	H	H	H	H	H	H	H	1231.28	37
	Confidence	Sequence	Modifications	# Protein Groups	# Proteins	# PSMs	Master Protein Accessions	# Missed Cleavages	Theo. MH+ [Da]	Sequence Length	Found in Sample Group: 1_AG38Duetto	Found in Sample Group: 5_AG167PI	Found in Sample Group: S_Semola	Found in Sample Group: 4_AG77Neolatino	Found in Sample Group: 3_AG69Lloyd	Found in Sample Group: SI_SemolaIntegrale	Found in Sample Group: 2_AG33Colosseo	XCorr Sequest HT	Charge Sequest HT	m/z [Da] Sequest HT	DeltaM [ppm] Sequest HT	RT [min] Sequest HT
	H	CSVNVPVY	1xCarbamidomethyl [C1]	22	93	3	A2IBK1; Q8W3X5; A0A2P1BXV0; Q6J6V0; A0A0U3ANN8; A0A346R8U1; R4JAP5; A9YWM3; D3U329; F8SGM9; A0A2R4Q9T1; R4JB62; D5FPF3; A0A0U3AIG6; C8CCM8; A2IBJ9; D5FPE9; A8CA05; F8SGM7; D5FPF4; Q68VI0; F8SGN9	3	937.445	8	NF	NF	H	NF	H	NF	H	1.18	1	937.444	-0.8	16.9848
	H	DAIRAIIY		25	101	217	A2IBK1; Q8W3X5; A0A2P1BXV0; Q6J6V0; A0A0U3ANN8; R4JAP5; A9YWM3; D5FPF1; D3U329; V9P785; F8SGM9; A0A2R4Q9T1; R4JB62; D5FPF3; A0A0U3AIG6; Q41552; C8CCM8; A2IBJ9; D5FPE9; A8CA05; F8SGM7; D5FPF4; Q68VI0; F8SGN9; B8Y0L6	0	934.536	8	H	H	H	H	H	H	H	2.32	2	467.772	0.44	19.2101
	H	GQWPQQQQVPQGTL		22	88	15	A2IBK1; Q8W3X5; A0A2P1BXV0; Q6J6V0; A0A0U3ANN8; R4JAP5; A9YWM3; D3U329; V9P785; F8SGM9; A0A2R4Q9T1; R4JB62; D5FPF3; A0A0U3AIG6; C8CCM8; A2IBJ9; A8CA05; F8SGM7; D5FPF4; Q68VI0; F8SGN9; B8Y0L6	1	1594.8	14	H	H	H	H	H	H	H	2.49	2	797.901	-1.57	19.641
	H	GQWPQQQQVPQGTLLQPHQIAQL		20	86	3	A2IBK1; Q8W3X5; A0A2P1BXV0; Q6J6V0; A0A0U3ANN8; R4JAP5; A9YWM3; D3U329; V9P785; F8SGM9; A0A2R4Q9T1; R4JB62; D5FPF3; A0A0U3AIG6; C8CCM8; A2IBJ9; A8CA05; D5FPF4; Q68VI0; F8SGN9	3	2623.37	23	NF	NF	NF	H	H	NF	NF	1.39	3	875.128	-1.24	25.9172
	H	GTTTIVPF		12	67	14	Q8W3X5; A0A2P1BXV0; A0A0U3ANN8; F8SGM9; R4JB62; C8CCM8; A2IBJ9; A8CA05; F8SGM7; D5FPF4; Q68VI0; F8SGN9	0	835.456	8	H	H	H	H	H	H	H	1.56	1	835.456	0.58	24.7638
	H	GVGTRVGAY		18	72	20	A2IBK1; Q8W3X5; A0A2P1BXV0; A0A0U3ANN8; R4JAP5; A9YWM3; D5FPF1; D3U329; F8SGM9; R4JB62; D5FPF3; C8CCM8; A2IBJ9; A8CA05; F8SGM7; D5FPF4; F8SGN9; B8Y0L6	0	879.468	9	H	H	H	H	H	H	H	1.63	2	440.237	-1.23	3.9266
	H	LQQPPFSQHQQPVLPQQQIPSVQPSIL		3	21	16	A2IBK1; V9P785; A2IBJ9	3	3062.64	27	NF	NF	H	H	H	NF	H	2.52	3	1021.55	0.66	27.7387
	H	LQQQCSPVAMPQSL	1xCarbamidomethyl [C5]	33	198	8	R9XVA5; A2IBK1; Q8W3X5; A0A2P1BXV0; D5FPE3; C8CCM7; Q6J6V0; A2IBV5; A9YWM3; D5FPF1; D3U329; V9P785; F8SGM9; Q8W3W8; R4JDM1; A0A2R4Q9T1; K0I5W1; R4JB62; D5FPF3; A0A0U3AGE0; Q41552; Q8W3X4; C8CCM8; A2IBJ9; A8CA05; F8SGM7; D5FPF4; Q68VI0; F8SGN9; Q8W3X0; B2Y2R6; B8Y0L6; A0A0U3ATU4	1	1586.77	14	NF	NF	H	H	H	H	H	1.9	2	793.886	-1	21.583
	H	NQPQQQQPQQSVQGVSQPQQQQKQL		20	82	21	A2IBK1; Q8W3X5; A0A2P1BXV0; Q6J6V0; A0A0U3ANN8; R4JAP5; A9YWM3; D5FPF1; D3U329; V9P785; F8SGM9; A0A2R4Q9T1; R4JB62; Q41552; C8CCM8; A2IBJ9; A8CA05; F8SGM7; F8SGN9; B8Y0L6	0	2887.44	25	H	H	H	H	H	H	H	2.26	3	963.15	-1.6	7.5568
	H	QQPPFSQHQQPVLPQQQIPSVQPSIL	1xGln->pyro-Glu [N-Term]	3	21	35	A2IBK1; V9P785; A2IBJ9	2	2932.53	26	NF	NF	H	H	H	H	H	2.86	2	1466.77	1.32	32.439
	H	QQPPFSQHQQPVLPQQQIPSVQPSIL	1xGln->pyro-Glu [N-Term]; 1xDeamidated [Q]	3	21	12	A2IBK1; V9P785; A2IBJ9	2	2933.52	26	NF	NF	H	H	H	H	NF	1.76	2	1467.27	6.27	32.1792
	H	QQPPFSQHQQPVLPQQQIPSVQPSIL		3	21	155	A2IBK1; V9P785; A2IBJ9	2	2949.56	26	NF	NF	H	H	H	H	H	5.47	3	983.857	-1.07	26.6665
	H	QQPQQQQL		26	108	96	G0YLZ2; A2IBK1; Q8W3X5; A0A2P1BXV0; A0A0U3ANN8; Q5XXZ7; R4JAP5; A9YWM3; D5FPF1; V9P785; F8SGM9; R4JB62; D5FPF3; A0A0U3AGE0; A0A0U3AIG6; C8CCM8; A2IBJ9; D5FPE9; A8CA05; F8SGM7; D4HNA5; D5FPF4; F5A7G6; Q68VI0; F8SGN9; B8Y0L6	0	997.506	8	H	H	H	H	H	H	H	2.65	1	997.505	-0.95	3.8091
	H	QQPQQQQL	1xGln->pyro-Glu [N-Term]	25	103	5	G0YLZ2; A2IBK1; Q8W3X5; A0A2P1BXV0; A0A0U3ANN8; Q5XXZ7; R4JAP5; A9YWM3; D5FPF1; V9P785; F8SGM9; R4JB62; D5FPF3; A0A0U3AIG6; C8CCM8; A2IBJ9; D5FPE9; A8CA05; F8SGM7; D4HNA5; D5FPF4; F5A7G6; Q68VI0; F8SGN9; B8Y0L6	0	980.48	8	NF	NF	NF	NF	H	H	H	1.55	2	490.743	-0.23	11.7416
	H	QQQPIPL		17	76	166	A2IBK1; Q8W3X5; A0A2P1BXV0; A0A0U3ANN8; A9YWM3; V9P785; F8SGM9; R4JB62; C8CCM8; A2IBJ9; A8CA05; F8SGM7; A7X9Y0; D5FPF4; Q68VI0; F8SGN9; B8Y0L6	0	823.467	7	H	H	H	H	H	H	H	1.76	1	823.466	-0.9	16.4551
	H	QQQPLPL	1xGln->pyro-Glu [N-Term]	17	76	42	A2IBK1; Q8W3X5; A0A2P1BXV0; A0A0U3ANN8; A9YWM3; V9P785; F8SGM9; R4JB62; C8CCM8; A2IBJ9; A8CA05; F8SGM7; A7X9Y0; D5FPF4; Q68VI0; F8SGN9; B8Y0L6	1	806.441	7	H	NF	H	H	H	H	H	1.05	1	806.44	-0.23	27.8002
	H	QQQPLPLQQILW		17	74	22	A2IBK1; Q8W3X5; A0A2P1BXV0; A0A0U3ANN8; A9YWM3; V9P785; F8SGM9; R4JB62; C8CCM8; A2IBJ9; A8CA05; F8SGM7; A7X9Y0; D5FPF4; Q68VI0; F8SGN9; B8Y0L6	3	1491.83	12	NF	NF	H	H	H	H	H	2.41	2	746.419	-0.73	38.6784
	H	RTLPTMCSVNVPVY	1xCarbamidomethyl [C7]	16	71	34	A2IBK1; Q8W3X5; A0A2P1BXV0; A0A0U3ANN8; R4JAP5; A9YWM3; F8SGM9; R4JB62; D5FPF3; C8CCM8; A2IBJ9; A8CA05; F8SGM7; D5FPF4; Q68VI0; F8SGN9	1	1636.82	14	H	H	H	H	H	H	H	2.98	2	818.912	-0.76	21.4662
	H	RTLPTMCSVNVPVY	1xOxidation [M6]; 1xCarbamidomethyl [C7]	16	71	9	A2IBK1; Q8W3X5; A0A2P1BXV0; A0A0U3ANN8; R4JAP5; A9YWM3; F8SGM9; R4JB62; D5FPF3; C8CCM8; A2IBJ9; A8CA05; F8SGM7; D5FPF4; Q68VI0; F8SGN9	1	1652.81	14	H	NF	NF	H	H	NF	H	2.36	2	826.909	-1.08	16.5473
	H	RTLPTMCSVNVPVYGTTTIVPF	1xCarbamidomethyl [C7]	12	65	51	Q8W3X5; A0A2P1BXV0; A0A0U3ANN8; F8SGM9; R4JB62; C8CCM8; A2IBJ9; A8CA05; F8SGM7; D5FPF4; Q68VI0; F8SGN9	2	2453.26	22	H	H	H	H	H	H	H	3.94	2	1227.13	-0.53	32.7605
	H	SIVLQEQQHGQGL		13	73	76	A2IBK1; Q8W3X5; A0A2P1BXV0; A0A0U3ANN8; A9YWM3; V9P785; F8SGM9; R4JB62; C8CCM8; A2IBJ9; A8CA05; F8SGM7; D5FPF4	1	1436.75	13	H	H	H	H	H	H	H	3.2	2	718.878	0.24	12.2673
	H	SIVLQEQQHGQGLNQPQQQQPQQSVQGVSQPQQQQKQL	1xDeamidated [Q]	12	60	7	A2IBK1; Q8W3X5; A0A2P1BXV0; A0A0U3ANN8; A9YWM3; V9P785; F8SGM9; R4JB62; C8CCM8; A2IBJ9; A8CA05; F8SGM7	2	4306.16	38	NF	NF	NF	NF	NF	H	NF	1.02	3	1436.06	-0.21	13.363
	H	SQHQQPVLPQQQIPSVQPSIL		12	68	55	A2IBK1; Q8W3X5; A0A2P1BXV0; V9P785; F8SGM9; R4JB62; A2IBJ9; A8CA05; F8SGM7; D5FPF4; F8SGN9; B8Y0L6	1	2352.27	21	H	H	H	H	H	H	H	4.59	2	1176.64	-0.05	23.8399
	H	SQQQQPVIPQQPPF		51	229	62	D0F0C5; N1R0S5; C6K8R4; D3UAL8; D0ES12; G0YLZ2; R9XVA5; A2IBK1; Q8W3X5; A0A2P1BXV0; B5TWK5; I3QPG3; Q84U12; D5FPE3; B5A810; C8CCM7; R4JAP5; D5FPF1; Q6J6U9; A0A2R4Q9T7; V9P6P6; C6K8R8; V9P769; Q8W3W8; B5A816; R9XUW0; R4JB62; D5FPF3; A0A0U3AGE0; B5A813; F1C940; Q8W3X4; A2IBJ9; R9YSZ0; F8SGQ2; A0A2R4Q9U1; Q9XGF0; A7XDG0; Q84U16; A7X9Y0; D5FPF4; A0A2R4Q9S5; F5A7G6; F8SGP8; Q68VI0; Q0Q2J1; Q8W3X0; X2J…	0	1621.83	14	H	H	H	H	H	H	H	2.91	2	811.419	-0.97	23.216
	H	SQQQQQFPQQQQPL		9	56	3	A2IBK1; A0A2P1BXV0; A0A0U3ANN8; V9P785; F8SGM9; A2IBJ9; A8CA05; F8SGM7; F8SGN9	1	1712.84	14	NF	NF	NF	H	H	NF	NF	1.65	2	856.92	-1.03	13.6968
	H	YQQQQPIQQQPQPF		13	65	7	A2IBK1; Q8W3X5; A0A2P1BXV0; V9P785; F8SGM9; R4JB62; A2IBJ9; A8CA05; F8SGM7; A7X9Y0; Q68VI0; F8SGN9; B8Y0L6	1	1757.86	14	NF	NF	H	H	H	NF	H	1.72	2	879.434	-0.44	16.7584
TRUE	Master Protein	Q8W3W8	Low-molecular-weight glutenin subunit group 3 type II (Fragment) OS=Triticum aestivum OX=4565 GN=lmw-gs PE=4 SV=1	70.607	22	1813	1	1	313	35.4	8.35	H	H	H	H	H	H	H	1224.26	22
	Confidence	Sequence	Modifications	# Protein Groups	# Proteins	# PSMs	Master Protein Accessions	# Missed Cleavages	Theo. MH+ [Da]	Sequence Length	Found in Sample Group: 1_AG38Duetto	Found in Sample Group: 5_AG167PI	Found in Sample Group: S_Semola	Found in Sample Group: 4_AG77Neolatino	Found in Sample Group: 3_AG69Lloyd	Found in Sample Group: SI_SemolaIntegrale	Found in Sample Group: 2_AG33Colosseo	XCorr Sequest HT	Charge Sequest HT	m/z [Da] Sequest HT	DeltaM [ppm] Sequest HT	RT [min] Sequest HT
	H	EAIRAIVY		16	69	218	D3UAL8; B2LWZ2; B5A810; A2IBV5; Q6J6U9; Q8W3W8; Q8W3X4; Q9XGF0; A7XDG0; F6M7E1; B2LWZ6; A0A346R8T9; A0A346R8T6; Q0Q2J1; Q8W3X0; B2Y2R6	0	934.536	8	H	H	H	H	H	H	H	2.52	2	467.771	-0.08	13.5366
	H	GQCVSQPQQQSQQQL	1xCarbamidomethyl [C3]	29	250	20	Q5PU42; D0F0C5; K7WV80; A0A3G3C4J5; Q1ZZT4; A0A165R8I1; C8CCM2; D0ES12; R9XVA5; H6VLQ1; C8CCM7; R4JFH5; A2IBV5; Q0PW08; Q8W3W8; R4JDM1; Q5MFK8; K0I5W1; A0A0U3AGE0; F1C940; H6VLQ3; Q9XGF0; Q3YB17; Q3YB18; Q5MFH4; T1LG74; A0A346R8T7; A0A2R4Q9V4; Q8W3X0	0	1743.81	15	H	NF	H	H	H	H	H	2.8	2	872.408	0.44	5.8298
	H	GVGTGVGG		1	4	19	Q8W3W8	0	603.31	8	H	NF	H	H	H	H	H	1.63	1	603.309	-1.17	3.1372
	H	LQQQCSPVAMPQSL	1xCarbamidomethyl [C5]	33	198	8	R9XVA5; A2IBK1; Q8W3X5; A0A2P1BXV0; D5FPE3; C8CCM7; Q6J6V0; A2IBV5; A9YWM3; D5FPF1; D3U329; V9P785; F8SGM9; Q8W3W8; R4JDM1; A0A2R4Q9T1; K0I5W1; R4JB62; D5FPF3; A0A0U3AGE0; Q41552; Q8W3X4; C8CCM8; A2IBJ9; A8CA05; F8SGM7; D5FPF4; Q68VI0; F8SGN9; Q8W3X0; B2Y2R6; B8Y0L6; A0A0U3ATU4	1	1586.77	14	NF	NF	H	H	H	H	H	1.9	2	793.886	-1	21.583
	H	QMENSHIPGLERPSQQQPLPPQQTL	1xGln->pyro-Glu [N-Term]; 1xDeamidated [N/Q]	10	46	29	R9XVA5; D5FPE3; A2IBV5; Q8W3W8; K0I5W1; Q8W3X4; A7XDG0; Q0Q2J1; Q8W3X0; B2Y2R6	4	2837.39	25	H	NF	H	NF	H	H	NF	1.95	3	946.469	0.94	24.0259
	H	QQQIPF	1xGln->pyro-Glu [N-Term]	20	115	122	A0A1D6PVA1; D3UAL8; A0A1D6PVM1; Q670S2; Q84U12; D5FPE3; A2IBV5; D5FPF1; A0A024A3B7; A0A3L6F0A4; Q8W3W8; Q5XXZ9; Q8W3X4; Q9XGF0; A7XDG0; B6SII5; Q0Q2J1; Q8W3X0; B2Y2R6; A0A0U3ATU4	0	743.372	6	H	H	H	H	H	H	H	1.23	1	743.372	-1	29.9125
	H	QQQLPF		20	115	466	A0A1D6PVA1; D3UAL8; A0A1D6PVM1; Q670S2; Q84U12; D5FPE3; A2IBV5; D5FPF1; A0A024A3B7; A0A3L6F0A4; Q8W3W8; Q5XXZ9; Q8W3X4; Q9XGF0; A7XDG0; B6SII5; Q0Q2J1; Q8W3X0; B2Y2R6; A0A0U3ATU4	1	760.399	6	H	H	H	H	H	H	H	1.53	1	760.399	0.15	17.7289
	H	RTLPTMCNVNVPL	1xCarbamidomethyl [C7]	14	67	116	D0F0C5; A0A0K2GSM3; D5FPE3; R4JFH5; C6KI71; Q8W3W8; Q8W3X4; Q4G3S5; A7XDG0; A0A287EFF7; Q0Q2J1; Q8W3X0; B2Y2R6; J9QGY8	1	1514.78	13	H	NF	H	H	H	H	H	3.7	2	757.894	-0.4	21.5241
	H	RTLPTMCNVNVPL	1xOxidation [M6]; 1xCarbamidomethyl [C7]	14	67	20	D0F0C5; A0A0K2GSM3; D5FPE3; R4JFH5; C6KI71; Q8W3W8; Q8W3X4; Q4G3S5; A7XDG0; A0A287EFF7; Q0Q2J1; Q8W3X0; B2Y2R6; J9QGY8	1	1530.78	13	H	NF	NF	H	H	H	H	2.69	2	765.891	-0.9	15.9942
	H	RTLPTMCNVNVPLY	1xCarbamidomethyl [C7]	13	66	83	D0F0C5; A0A0K2GSM3; D5FPE3; R4JFH5; C6KI71; Q8W3W8; Q8W3X4; Q4G3S5; A7XDG0; Q0Q2J1; Q8W3X0; B2Y2R6; J9QGY8	2	1677.85	14	H	NF	H	H	H	H	H	3.08	2	839.426	-0.56	23.1963
	H	RTLPTMCNVNVPLY	1xOxidation [M6]; 1xCarbamidomethyl [C7]	13	66	7	D0F0C5; A0A0K2GSM3; D5FPE3; R4JFH5; C6KI71; Q8W3W8; Q8W3X4; Q4G3S5; A7XDG0; Q0Q2J1; Q8W3X0; B2Y2R6; J9QGY8	2	1693.84	14	H	NF	NF	H	H	NF	H	1.82	2	847.423	-1.01	18.2575
	H	RTTTRVPF		10	44	59	D3UAL8; D5FPE3; A2IBV5; Q8W3W8; Q8W3X4; Q9XGF0; A7XDG0; Q0Q2J1; Q8W3X0; B2Y2R6	0	977.553	8	H	H	H	H	H	H	H	1.53	2	489.28	-0.34	3.8425
	H	SIILQEQQQVQGSIQTQQQQPQQL	1xDeamidated [Q]	11	56	20	D5FPE3; A2IBV5; Q8W3W8; A0A0U3AGE0; Q8W3X4; Q9XGF0; A7XDG0; Q0Q2J1; Q8W3X0; B2Y2R6; A0A0U3ATU4	1	2779.42	24	H	NF	H	NF	NF	NF	NF	1.27	3	927.151	6.02	23.8626
	H	SIILQEQQQVQGSIQTQQQQPQQL		11	56	84	D5FPE3; A2IBV5; Q8W3W8; A0A0U3AGE0; Q8W3X4; Q9XGF0; A7XDG0; Q0Q2J1; Q8W3X0; B2Y2R6; A0A0U3ATU4	1	2778.44	24	H	H	H	H	H	H	H	5.08	2	1389.72	0.61	24.0527
	H	SQQQQPPFSQQQQPPF		49	266	54	A0A165R8I1; D3UAL8; B2LWZ2; R9XVA5; A0A0A0R2J7; G9AYK6; X2J8E3; F1C945; R9XV91; Q5MFH0; D5FPE3; B5A810; Q38L54; R4JFH5; A2IBV5; R9XUD0; P93794; A0A0A0R2I8; A0A1U9XLA9; C6KI71; Q8W3W8; Q84NE4; F1C943; A0A1G4P206; Q2PQJ6; X2JAE7; D0ES19; A0A024A269; Q8W3X4; D0ES20; D0ES16; R4JB44; Q9XGF0; A7XDG0; B2LWZ6; Q84U16; Q6QGW0; A0A068F8R5; T1LG74; A0A346R8T6; A0A089VKK4; A0A0A0QYP7; K7R468; B8XU51; V9P6N2;…	1	1899.9	16	H	H	H	H	H	H	H	4	2	950.452	-0.53	20.9553
	H	SQQQQPVIPQQPPF		51	229	62	D0F0C5; N1R0S5; C6K8R4; D3UAL8; D0ES12; G0YLZ2; R9XVA5; A2IBK1; Q8W3X5; A0A2P1BXV0; B5TWK5; I3QPG3; Q84U12; D5FPE3; B5A810; C8CCM7; R4JAP5; D5FPF1; Q6J6U9; A0A2R4Q9T7; V9P6P6; C6K8R8; V9P769; Q8W3W8; B5A816; R9XUW0; R4JB62; D5FPF3; A0A0U3AGE0; B5A813; F1C940; Q8W3X4; A2IBJ9; R9YSZ0; F8SGQ2; A0A2R4Q9U1; Q9XGF0; A7XDG0; Q84U16; A7X9Y0; D5FPF4; A0A2R4Q9S5; F5A7G6; F8SGP8; Q68VI0; Q0Q2J1; Q8W3X0; X2J…	0	1621.83	14	H	H	H	H	H	H	H	2.91	2	811.419	-0.97	23.216
	H	SQQQQPVLL		10	31	53	D3UAL8; B8Y444; A2IBV5; Q8W3W8; Q8W3X4; Q9XGF0; Q84U16; B9VSH9; Q8W3X0; B2Y2R6	1	1040.57	9	H	H	H	H	H	H	H	2.11	2	520.791	0.4	17.0267
	H	VHPSIL		36	208	822	I3XHQ0; D3UAL8; H9XGZ9; R9XVA5; A2IBJ7; D5FPE3; D0F0C4; C8CCM7; P06471; A2IBV5; Q0PIV6; A0A287EIZ3; Q8W3W8; R4JDM1; K0I5W1; Q40026; A0A0U3AGE0; A0A0U3AIG6; Q8W3X4; D5FPE9; Q9XGF0; A0A287EFG2; A7XDG0; I6TMW4; I6SJ22; A0A0U2JFU1; A8IEC6; A0A287EFF7; A0A0K2GRQ1; I6SW30; Q0Q2J1; Q8W3X0; A0A287EIW5; B2Y2R6; A8IEB4; A0A0U3ATU4	0	665.398	6	H	H	H	H	H	H	H	1.62	1	665.397	-0.94	7.2207
	H	VHPSILQQLNPCKVF	1xCarbamidomethyl [C12]	24	149	92	D3UAL8; R9XVA5; D5FPE3; C8CCM7; P06471; Q0PIV6; A0A287EIZ3; Q8W3W8; R4JDM1; K0I5W1; Q40026; A0A0U3AIG6; Q8W3X4; D5FPE9; Q9XGF0; A0A287EFG2; A7XDG0; I6TMW4; I6SJ22; I6SW30; Q0Q2J1; Q8W3X0; A0A287EIW5; B2Y2R6	2	1779.96	15	H	H	H	H	H	H	H	4.28	3	593.991	0.51	24.9486
	H	YRTTTRVPF		10	44	134	D3UAL8; D5FPE3; A2IBV5; Q8W3W8; Q8W3X4; Q9XGF0; A7XDG0; Q0Q2J1; Q8W3X0; B2Y2R6	2	1140.62	9	H	H	H	H	H	H	H	2.34	3	380.877	-0.39	6.8361
TRUE	Master Protein	A0A1P8DSE3	Alpha-gliadin storage protein (Fragment) OS=Triticum spelta OX=58933 PE=2 SV=1	58.9041	30	1159	1	1	292	33.5	8.03	H	H	H	H	H	H	H	1213.57	30
	Confidence	Sequence	Modifications	# Protein Groups	# Proteins	# PSMs	Master Protein Accessions	# Missed Cleavages	Theo. MH+ [Da]	Sequence Length	Found in Sample Group: 1_AG38Duetto	Found in Sample Group: 5_AG167PI	Found in Sample Group: S_Semola	Found in Sample Group: 4_AG77Neolatino	Found in Sample Group: 3_AG69Lloyd	Found in Sample Group: SI_SemolaIntegrale	Found in Sample Group: 2_AG33Colosseo	XCorr Sequest HT	Charge Sequest HT	m/z [Da] Sequest HT	DeltaM [ppm] Sequest HT	RT [min] Sequest HT
	H	ALQTLPAMCNVY	1xCarbamidomethyl [C9]	25	250	84	A0A0E3Z552; G9I1R6; G9I1R5; A0A1P8DT82; A0A1P8DTB0; A0A0E3URC4; G9I1S5; A0A1P8DSN6; A8VZI4; H8Y0G8; D2X6C9; M8AS61; A9YRP1; Q0GK30; A0A1P8DSE3; M4WER7; A9YRP3; I0IT53; A0A0E3UQX9; I0IT57; X2KWD8; A0A1P8DT27; I0IT59; A9Z0K0; A0A0E3Z7K2	2	1380.67	12	H	H	H	H	H	H	H	2.23	2	690.836	-0.04	26.2605
	H	CCQHLW	2xCarbamidomethyl [C1; C2]	18	250	86	A0A1P8DSI8; Q2QL61; A0A0E3UQX3; A0A1P8DT82; M4WFC9; M4WEQ6; H9NAK8; A0A1P8DSH1; A0A1P8DT06; A0A0E3Z5X0; D2X6C9; Q0GK30; A0A1P8DSE3; A0A1P8DSE0; A0A0E3UQX9; A0A1P8DSG6; A0A1P8DT27; A0A0E3Z7K2	1	903.36	6	H	H	H	H	H	H	H	2.2	2	452.184	0.17	9.5908
	H	CSTTIAPF	1xCarbamidomethyl [C1]	29	195	20	A0A2R2Y432; A0A142L078; G9I1R6; H8Y0G1; I0IT58; B5AH62; M4WH49; H8Y0F3; B1PDK7; A0A1P8DSN6; A0A0E3URD6; B8XU29; A0A0E3Z5J4; K4NYM6; A0A1P8DT06; A0A0K2QJ82; M8AS61; H8Y0H4; A9YRP1; A0A0K2QJD8; A0A1P8DSE3; I0IT53; I0IT57; F4YT75; A0A023WGX2; A0A1P8DTC2; E5FF17; I0IT59; A0A1P8DSB7	0	896.418	8	H	H	H	H	H	H	H	1.33	1	896.417	-1.04	19.929
	H	GIFGTN		44	372	134	A0A2R2Y432; A0A1P8DSI8; A0A0E3Z552; G9I1R6; U3PUB1; G9I1R5; I3RXY0; A0A1P8DT82; R9XST5; M4WH49; I3RXV8; A0A1P8DTB0; A0A0E3URC4; G9I1S5; A0A1P8DSN6; I3RXY2; A0A1P8DSH1; A0A0E3Z5J4; A7LHC5; A0A291I1T3; M4WYH4; E0Z2G0; H8Y0D1; A5JSA3; A0A1P8DSY8; F5A7H0; H8Y0E6; D2X6C9; M8AS61; A9YRP1; U3PXH9; Q0GK30; A0A1P8DSE3; M4WER7; R9XUL8; A7LHB8; A0A0E3UQX9; X2L2G3; X2KWD8; I3RXW9; E0Z2G8; A0A1P8DT27; H8Y0E7;…	1	608.304	6	H	H	H	H	H	H	H	1.65	1	608.304	0.47	15.7513
	H	IGQQQPFPPQQPYPQPQPFPSQQPY		14	259	699	A0A1P8DSI8; A0A1P8DT82; M4WFC9; I3RXV8; Q41533; A0A1P8DT06; A0A023WGB8; A0A0E3URA8; D2X6C9; A0A0K2QJD8; Q0GK30; A0A1P8DSE3; A0A1P8DSG6; R9XU77	3	2922.42	25	H	H	H	H	H	H	H	4.46	2	1461.71	-0.59	26.6583
	H	LGQQQPFPPQQPY		14	259	9	A0A1P8DSI8; A0A1P8DT82; M4WFC9; I3RXV8; Q41533; M4WEQ6; H9NAK8; A0A1P8DT06; A0A023WGB8; D2X6C9; Q0GK30; A0A1P8DSE3; A0A1P8DSG6; A0A0E3Z7K2	2	1527.76	13	NF	NF	H	NF	H	NF	NF	1.04	2	764.38	-3.74	17.7657
	H	LQIQPF		23	255	99	A0A0E3Z552; I3RXY0; A0A1P8DT82; R9XST5; I3RXV8; A0A0E3URC4; G9I1S5; I3RXY2; Q2QL52; A0A1P8DSH1; A7LHC5; A0A291I1T3; M4WYH4; E0Z2G0; Q2QL42; A5JSA3; D2X6C9; U3PXH9; Q0GK30; A0A1P8DSE3; R9XUL8; E0Z2G8; A0A0E3Z7K2	1	745.424	6	H	H	H	H	NF	H	H	1.47	1	745.424	-0.8	24.676
	H	LQLQPFPQPQLPY		20	250	73	A0A1P8DSI8; I3RXY0; R9XST5; I3RXV8; G9I1S5; I3RXY2; Q2QL52; A0A291I1T3; M4WYH4; E0Z2G0; Q2QL42; D2X6C9; U3PXH9; Q0GK30; A0A1P8DSE3; R9XUL8; A0A1P8DT67; A0A0E3UQX9; E0Z2G8; A0A0E3Z7K2	4	1568.85	13	H	H	H	H	H	H	H	3.49	2	784.927	-0.42	33.5583
	H	QQPQQQYPL		18	185	71	Q2QL61; A0A142L072; M4WFC9; H8Y0F3; A0A0N7A5G3; I6U6J1; A0A0E3URA8; E5FF30; A0A1P8DSE3; M4WER7; A0A0E3Z5V1; E5FF35; A0A0N7A522; A0A0E3UQX9; A0A142L083; E5FF31; A0A1P8DSG6; A0A0E3Z7K2	1	1129.56	9	H	H	H	H	H	H	H	2.49	2	565.285	-0.87	13.0335
	H	QQPQQQYPLGQGSF		15	138	17	Q2QL61; A0A142L072; M4WFC9; H8Y0F3; I6U6J1; A0A0E3URA8; E5FF30; A0A1P8DSE3; M4WER7; A0A0E3Z5V1; A0A0E3UQX9; A0A142L083; E5FF31; A0A1P8DSG6; A0A0E3Z7K2	2	1605.77	14	H	H	H	H	H	H	H	3.21	2	803.385	-2.08	20.6857
	H	QTLPAMCNVY	1xCarbamidomethyl [C7]	27	251	5	A0A0E3Z552; G9I1R6; G9I1R5; A0A1P8DT82; A0A1P8DTB0; A0A0E3URC4; G9I1S5; A0A1P8DSN6; A0A1P8DSH1; A8VZI4; A0A1P8DSY8; H8Y0G8; D2X6C9; M8AS61; A9YRP1; Q0GK30; A0A1P8DSE3; M4WER7; A9YRP3; I0IT53; A0A0E3UQX9; I0IT57; X2KWD8; A0A1P8DT27; I0IT59; A9Z0K0; A0A0E3Z7K2	1	1196.54	10	NF	H	H	H	NF	H	NF	1.45	2	598.775	-1	21.3197
	H	RPQQPYPQPQPQY		23	250	136	A0A1P8DSI8; U3PUB1; I3RXY0; A0A1P8DT82; R9XST5; I3RXV8; Q2QL52; A7LHC5; A0A291I1T3; M4WYH4; E0Z2G0; Q2QL42; A5JSA3; D2X6C9; U3PXH9; Q0GK30; A0A1P8DSE3; R9XUL8; A0A0E3UQX9; I3RXX8; I3RXW9; A0A1P8DT27; A0A0E3Z7K2	1	1626.8	13	H	H	H	H	H	H	H	3.18	2	813.904	-1.36	8.8088
	H	SQPQPF		16	253	23	A0A1P8DSI8; Q2QL61; A0A1P8DT82; M4WFC9; Q41533; M4WEQ6; H9NAK8; A0A1P8DT06; A0A023WGB8; A0A0E3Z5X0; D2X6C9; Q0GK30; A0A1P8DSE3; A0A0E3UQX9; A0A1P8DT27; A0A0E3Z7K2	0	703.341	6	H	H	H	H	H	H	H	1.67	1	703.341	-0.21	9.3433
	H	SSQVSF		5	66	16	I6U6J1; A0A0E3URA8; A0A1P8DSE3; A0A142L083; A0A1P8DSG6	0	654.309	6	H	H	H	H	H	H	H	1.51	1	654.309	-0.38	10.1753
	H	XGQQQPFPPQQPYPQPQPF		13	259	24	A0A1P8DSI8; A0A1P8DT82; M4WFC9; I3RXV8; Q41533; A0A1P8DT06; A0A023WGB8; A0A0E3URA8; D2X6C9; A0A0K2QJD8; Q0GK30; A0A1P8DSE3; A0A1P8DSG6	2	2222.1	19	NF	H	H	NF	H	H	NF	1.6	2	1111.55	-0.59	25.7783
TRUE	Master Protein	R4JFH5	Low-molecular-weight glutenin subunit (Fragment) OS=Triticum aestivum OX=4565 GN=LMW-GS PE=4 SV=1	61.3372	34	1466	1	1	344	40.1	8.15	H	H	H	H	H	H	H	1193.42	34
	Confidence	Sequence	Modifications	# Protein Groups	# Proteins	# PSMs	Master Protein Accessions	# Missed Cleavages	Theo. MH+ [Da]	Sequence Length	Found in Sample Group: 1_AG38Duetto	Found in Sample Group: 5_AG167PI	Found in Sample Group: S_Semola	Found in Sample Group: 4_AG77Neolatino	Found in Sample Group: 3_AG69Lloyd	Found in Sample Group: SI_SemolaIntegrale	Found in Sample Group: 2_AG33Colosseo	XCorr Sequest HT	Charge Sequest HT	m/z [Da] Sequest HT	DeltaM [ppm] Sequest HT	RT [min] Sequest HT
	H	ARSQML		49	270	7	D0F0C5; J9QEK9; D0ES12; B2LWZ2; G0YLZ2; G9AYK6; A0A2P1BXV0; B5A810; C8CCM7; Q6J6V0; R4JFH5; A0A346R8U1; R4JAP5; A9YWM3; D3U329; P93794; J9QFV1; C6K8R8; A0A287EIZ3; F5A7G7; B5A816; Q84NE4; A0A2R4Q9T1; A0A346R8U2; F6KHQ0; R4JB62; D0ES19; B5A813; F1C940; A0A0U3AIG6; Q5XXZ9; D5FPE9; Q9XGF0; A8CA05; Q3YB17; B2LWZ6; A0A346R8T9; Q84U16; T1LG74; A0A346R8T7; A0A2R4Q9V4; A0A346R8T6; A0A089VKK4; Q2L990; A0A…	0	705.371	6	H	NF	H	H	H	H	H	1.23	1	705.37	-1.74	3.2777
	H	GQCVSQPQQQSQQQL	1xCarbamidomethyl [C3]	29	250	20	Q5PU42; D0F0C5; K7WV80; A0A3G3C4J5; Q1ZZT4; A0A165R8I1; C8CCM2; D0ES12; R9XVA5; H6VLQ1; C8CCM7; R4JFH5; A2IBV5; Q0PW08; Q8W3W8; R4JDM1; Q5MFK8; K0I5W1; A0A0U3AGE0; F1C940; H6VLQ3; Q9XGF0; Q3YB17; Q3YB18; Q5MFH4; T1LG74; A0A346R8T7; A0A2R4Q9V4; Q8W3X0	0	1743.81	15	H	NF	H	H	H	H	H	2.8	2	872.408	0.44	5.8298
	H	GQQPQQQQL		29	250	39	D0F0C5; K7WV80; A0A3G3C4J5; A0A165R8I1; D0ES12; R9XVA5; A0A0A0R2J7; G9AYK6; X2J8E3; R4JFH5; P93794; Q84NE4; R4JDM1; Q5MFK8; Q2PQJ6; A0A346R8U2; D0ES19; F1C940; Q9XGF0; Q3YB17; Q5MFH4; T1LG74; A0A346R8T7; A0A2R4Q9V4; A0A089VKK4; Q2L990; A0A0A0QYP7; B8XU51; B2LX00	0	1054.53	9	H	H	H	H	H	H	H	2.05	1	1054.53	-0.47	3.9132
	H	GVGTGVGA		51	250	18	Q5PU42; D0F0C5; K7WV80; A0A3G3C4J5; Q1ZZT4; A0A165R8I1; B8XU59; P93792; D0PX24; C6K8R4; D0ES12; B2LWZ2; G9AYK6; H6VLQ1; I3QPG3; Q8W3V8; B5A810; F4YT76; R4JFH5; A0A346R8U1; D2DII6; Q0PW08; F5A7G7; B5A816; I3QPG6; A0A346R8U2; Q41547; H9XH00; Q84U17; A0A0U3AGE0; B5A813; F1C940; Q5XXZ9; K7XED4; D7RFI1; F8SGM2; R4JD66; I3QPG4; Q9XGF0; Q8H0J4; Q3YB17; B2LWZ6; A0A346R8T9; K7XED9; Q6B780; T1LG74; A0A346R…	0	617.325	8	H	H	H	H	H	H	H	2.13	1	617.325	-0.69	3.6119
	H	GVGTGVGAY		51	250	8	Q5PU42; D0F0C5; K7WV80; A0A3G3C4J5; Q1ZZT4; A0A165R8I1; B8XU59; P93792; D0PX24; C6K8R4; D0ES12; B2LWZ2; G9AYK6; H6VLQ1; I3QPG3; Q8W3V8; B5A810; F4YT76; R4JFH5; A0A346R8U1; D2DII6; Q0PW08; F5A7G7; B5A816; I3QPG6; A0A346R8U2; Q41547; H9XH00; Q84U17; A0A0U3AGE0; B5A813; F1C940; Q5XXZ9; K7XED4; D7RFI1; F8SGM2; R4JD66; I3QPG4; Q9XGF0; Q8H0J4; Q3YB17; B2LWZ6; A0A346R8T9; K7XED9; Q6B780; T1LG74; A0A346R…	0	780.389	9	H	NF	H	H	H	NF	NF	1.63	1	780.388	-0.51	10.1166
	H	LQQQCIPVAM	1xCarbamidomethyl [C5]	28	177	32	Q38L53; I3QPH4; A0A0A0R2J7; G9AYK6; X2J8E3; F1C945; R9XV91; Q5MFH0; Q38L54; R4JFH5; R9XUD0; R9YTM4; P93794; A0A1U9XLA9; C6KI71; Q84NE4; F1C943; Q2PQJ6; X2JAE7; D0ES16; R4JB44; Q6QGW0; T1LG74; A0A346R8T7; A0A089VKK4; K7R468; V9P6N2; Q38L52	4	1187.59	10	H	H	H	H	H	H	H	2.03	2	594.299	-0.94	18.9972
	H	PQQQQSPFSQQQQQQPPF	1xDeamidated [Q]	1	1	102	R4JFH5	1	2157	18	H	H	H	H	H	H	H	1.54	2	1079	-7.48	36.3779
	H	PQQQQSPFSQQQQQQPPF	2xDeamidated [Q]	1	1	97	R4JFH5	1	2157.98	18	H	H	H	H	H	H	H	1.75	2	1079.49	-8.44	37.5533
	H	QQLNPCKVF	1xCarbamidomethyl [C6]	46	251	287	D0F0C5; K7WV80; N1R0S5; K7WV72; G0YLZ2; G9AYK6; A0A2P1BXV0; I3QPG3; A0A346R8U0; Q6J6V0; R4JFH5; A0A346R8U1; R4JAP5; Q6J6U9; A0A2R4Q9T7; D3U329; R4JFK3; P93794; C6K8R8; A0A287EIZ3; B5A816; Q84NE4; I3QPH1; A0A2R4Q9T1; A0A346R8U2; Q40026; R4JB62; A0A0U3AIG6; D7RFI1; R4JD66; A0A2R4Q9U1; A0A2R4Q9S8; Q9XGF0; A8CA05; Q3YB17; B2LWZ6; A0A346R8T7; A0A2R4Q9V4; A0A346R8T6; A0A089VKK4; A8IEC6; A0A2R4Q9S5; B2L…	1	1133.58	9	H	H	H	H	H	H	H	2.56	2	567.292	0.33	14.0594
	H	QQLNPCKVF	1xGln->pyro-Glu [N-Term]; 1xCarbamidomethyl [C6]	46	250	108	D0F0C5; K7WV80; N1R0S5; K7WV72; G0YLZ2; G9AYK6; A0A2P1BXV0; I3QPG3; A0A346R8U0; Q6J6V0; R4JFH5; A0A346R8U1; R4JAP5; Q6J6U9; A0A2R4Q9T7; D3U329; R4JFK3; P93794; C6K8R8; A0A287EIZ3; B5A816; Q84NE4; I3QPH1; A0A2R4Q9T1; A0A346R8U2; Q40026; R4JB62; A0A0U3AIG6; D7RFI1; R4JD66; A0A2R4Q9U1; A0A2R4Q9S8; Q9XGF0; A8CA05; Q3YB17; B2LWZ6; A0A346R8T7; A0A2R4Q9V4; A0A346R8T6; A0A089VKK4; A8IEC6; A0A2R4Q9S5; B2L…	1	1116.55	9	H	H	H	H	H	H	H	1.47	1	1116.55	0.02	23.8566
	H	QQQCCQQL	2xCarbamidomethyl [C4; C5]	66	374	29	D0F0C5; M7ZW11; K7WV80; N1R0S5; B6UKM2; C6K8R4; A0A287EFH8; D0ES12; Q84M19; E5FF15; W8E194; A0A0N7A5G3; I3QPG3; A0A0K2GSM3; W8E1A2; K7WZA8; P06471; Q6J6V0; R4JFH5; F5A7G9; R4JAP5; H8Y0E0; Q6J6U9; D3U329; A0A024A3B7; R4JFK3; P93794; E3UTY1; Q0PIV6; W8E6H6; A0A287EIZ3; A0A0K2GRS0; H8Y0M0; A0A0N7A547; I3QPH1; A0A2R4Q9T1; C5MQZ6; Q40026; A0A0N7A503; B6UKR2; B6UKQ9; W8E6G7; E5FF35; K7XED4; A0A0N7A522;…	0	1092.46	8	H	H	H	H	H	H	H	1.53	1	1092.45	-1.04	3.8792
	H	RTLPTM		48	251	45	D0F0C5; N1R0S5; K7WV72; J9QEK9; A9YRN9; C6K8R4; G0YLZ2; A0A2P1BXV0; W8E197; W8E194; I3QPG3; W8E1A2; B5A810; C8CCM7; R4JFH5; Q5XXZ7; R4JAP5; A9YWM3; Q6J6U9; A0A2R4Q9T7; J9QFV1; W8E6H6; H8Y0M0; B5A816; W8E2L7; F6KHQ0; R4JB62; W8E6G7; B5A813; K7XED4; D7RFI1; C8CCM8; W8E0F4; A0A2R4Q9U1; A0A2R4Q9S8; W8E5R1; Q9XGF0; A8CA05; Q84U16; Q6B780; A0A346R8T7; A8IEC6; A0A0K2GRQ1; A0A2R4Q9S5; B6UKQ7; X2JC88; A8I…	1	718.392	6	H	H	H	H	H	H	H	1.27	1	718.39	-2.41	5.4248
	H	RTLPTMCNVNVPL	1xCarbamidomethyl [C7]	14	67	116	D0F0C5; A0A0K2GSM3; D5FPE3; R4JFH5; C6KI71; Q8W3W8; Q8W3X4; Q4G3S5; A7XDG0; A0A287EFF7; Q0Q2J1; Q8W3X0; B2Y2R6; J9QGY8	1	1514.78	13	H	NF	H	H	H	H	H	3.7	2	757.894	-0.4	21.5241
	H	RTLPTMCNVNVPL	1xOxidation [M6]; 1xCarbamidomethyl [C7]	14	67	20	D0F0C5; A0A0K2GSM3; D5FPE3; R4JFH5; C6KI71; Q8W3W8; Q8W3X4; Q4G3S5; A7XDG0; A0A287EFF7; Q0Q2J1; Q8W3X0; B2Y2R6; J9QGY8	1	1530.78	13	H	NF	NF	H	H	H	H	2.69	2	765.891	-0.9	15.9942
	H	RTLPTMCNVNVPLY	1xCarbamidomethyl [C7]	13	66	83	D0F0C5; A0A0K2GSM3; D5FPE3; R4JFH5; C6KI71; Q8W3W8; Q8W3X4; Q4G3S5; A7XDG0; Q0Q2J1; Q8W3X0; B2Y2R6; J9QGY8	2	1677.85	14	H	NF	H	H	H	H	H	3.08	2	839.426	-0.56	23.1963
	H	RTLPTMCNVNVPLY	1xOxidation [M6]; 1xCarbamidomethyl [C7]	13	66	7	D0F0C5; A0A0K2GSM3; D5FPE3; R4JFH5; C6KI71; Q8W3W8; Q8W3X4; Q4G3S5; A7XDG0; Q0Q2J1; Q8W3X0; B2Y2R6; J9QGY8	2	1693.84	14	H	NF	NF	H	H	NF	H	1.82	2	847.423	-1.01	18.2575
	H	SQQPPISQQQQPPF		28	161	10	A0A0A0R2J7; G9AYK6; X2J8E3; F1C945; R9XV91; Q5MFH0; Q38L54; R4JFH5; R9XUD0; R9YTM4; P93794; A0A0A0R2I8; A0A1U9XLA9; C6KI71; Q84NE4; F1C943; A0A1G4P206; Q2PQJ6; X2JAE7; D0ES16; R4JB44; Q6QGW0; T1LG74; A0A089VKK4; A0A0A0QYP7; K7R468; V9P6N2; Q38L52	0	1609.8	14	H	NF	NF	H	NF	H	H	1.32	2	805.401	-0.74	17.0117
	H	SQQPPISQQQQPPFSQQQQPPFSQQQQIPVIHPSVL		17	98	20	G9AYK6; F1C945; R9XV91; Q5MFH0; Q38L54; R4JFH5; A0A1U9XLA9; Q84NE4; F1C943; A0A1G4P206; X2JAE7; D0ES16; R4JB44; Q6QGW0; A0A089VKK4; A0A0A0QYP7; K7R468	2	4105.09	36	H	H	H	H	H	H	H	3.74	3	1369.03	-0.16	28.3134
	H	SQQQQIPVIHPSVL		28	173	108	Q38L53; A0A0A0R2J7; G9AYK6; X2J8E3; F1C945; R9XV91; Q5MFH0; Q38L54; R4JFH5; R9XUD0; R9YTM4; P93794; A0A1U9XLA9; Q84NE4; F1C943; A0A1G4P206; X2JAE7; D0ES19; D0ES20; D0ES16; R4JB44; Q6QGW0; T1LG74; A0A089VKK4; Q2L990; A0A0A0QYP7; K7R468; V9P6N2	0	1573.87	14	H	H	H	H	H	H	H	3.7	2	787.438	-0.3	20.1699
	H	SQQQQPPF		42	254	83	N1R0S5; A0A165R8I1; A9YRN9; B2LWZ2; A0A0A0R2J7; G9AYK6; A0A2P1BXV0; B5A810; C8CCM7; Q6J6V0; R4JFH5; Q5XXZ7; A9YWM3; Q6J6U9; A0A2R4Q9T7; D3U329; P93794; A0A0A0R2I8; B5A816; Q84NE4; A0A2R4Q9T1; Q2PQJ6; D0ES19; B5A813; A0A0U3AIG6; C8CCM8; D5FPE9; A0A2R4Q9U1; Q9XGF0; A8CA05; B2LWZ6; A0A346R8T9; Q84U16; T1LG74; A0A346R8T7; A0A346R8T6; A0A089VKK4; Q2L990; A0A0A0QYP7; A0A2R4Q9S5; B8XU51; X2JC88	0	959.458	8	H	H	H	H	H	H	H	2.1	2	480.233	-0.32	10.2887
	H	SQQQQPPFSQQQQIPVIHPSVL		22	127	39	Q38L53; G9AYK6; F1C945; R9XV91; Q5MFH0; Q38L54; R4JFH5; A0A1U9XLA9; Q84NE4; F1C943; A0A1G4P206; X2JAE7; D0ES19; D0ES20; D0ES16; R4JB44; Q6QGW0; T1LG74; A0A089VKK4; Q2L990; A0A0A0QYP7; K7R468	1	2514.31	22	H	H	H	H	H	H	H	3.15	2	1257.66	0.06	25.1568
	H	SQQQQPPFSQQQQIPVIHPSVL	1xDeamidated [Q]	22	124	4	Q38L53; G9AYK6; F1C945; R9XV91; Q5MFH0; Q38L54; R4JFH5; A0A1U9XLA9; Q84NE4; F1C943; A0A1G4P206; X2JAE7; D0ES19; D0ES20; D0ES16; R4JB44; Q6QGW0; T1LG74; A0A089VKK4; Q2L990; A0A0A0QYP7; K7R468	1	2515.29	22	NF	NF	H	NF	NF	NF	NF	1.07	2	1258.16	9.33	25.1861
	H	SQQQQPPFSQQQQPPF		49	266	54	A0A165R8I1; D3UAL8; B2LWZ2; R9XVA5; A0A0A0R2J7; G9AYK6; X2J8E3; F1C945; R9XV91; Q5MFH0; D5FPE3; B5A810; Q38L54; R4JFH5; A2IBV5; R9XUD0; P93794; A0A0A0R2I8; A0A1U9XLA9; C6KI71; Q8W3W8; Q84NE4; F1C943; A0A1G4P206; Q2PQJ6; X2JAE7; D0ES19; A0A024A269; Q8W3X4; D0ES20; D0ES16; R4JB44; Q9XGF0; A7XDG0; B2LWZ6; Q84U16; Q6QGW0; A0A068F8R5; T1LG74; A0A346R8T6; A0A089VKK4; A0A0A0QYP7; K7R468; B8XU51; V9P6N2;…	1	1899.9	16	H	H	H	H	H	H	H	4	2	950.452	-0.53	20.9553
	H	SQQQQPPFSQQQQPPFSQQQQPPF		10	78	9	X2J8E3; R9XV91; Q38L54; R4JFH5; R9XUD0; A0A1G4P206; Q2PQJ6; R4JB44; T1LG74; B8XU51	2	2840.34	24	H	NF	NF	NF	NF	H	H	1.87	3	947.449	-1.77	25.5594
	H	TSLAL		50	1284	464	D0F0C5; K7WV80; N1R0S5; K7WV72; A0A0A9RWM6; D0ES12; M7Z8V3; G9AYK6; A0A368QQ96; A0A2P1BXV0; Q670S2; I1ILT7; A0A0Q3GGG2; Q6J6V0; R4JFH5; A0A287GA23; R4JAP5; J3M5K7; Q6J6U9; A0A2R4Q9T7; M8AHS2; A0A0E0MHA4; D3U329; A0A1E5W740; F2DFY3; B5A816; Q84NE4; A0A0D9ZSX2; M0Y530; A0A0E0JEE4; A0A2R4Q9T1; A0A0D9UX31; R4JB62; A0A0E0L7K0; A0A0E0PGE1; R4JD66; A0A1Z5R643; A0A0E0JER3; A0A2R4Q9U1; A0A2R4Q9S8; Q9XGF0;…	1	504.303	5	H	H	H	H	H	H	H	1.74	1	504.303	-0.29	13.2342
TRUE	Master Protein	C8CCM8	Low molecular weight glutenin OS=Aegilops speltoides OX=4573 PE=4 SV=1	68.0328	39	1377	4	1	366	41.9	8.32	H	H	H	H	H	H	H	1187.62	39
	Confidence	Sequence	Modifications	# Protein Groups	# Proteins	# PSMs	Master Protein Accessions	# Missed Cleavages	Theo. MH+ [Da]	Sequence Length	Found in Sample Group: 1_AG38Duetto	Found in Sample Group: 5_AG167PI	Found in Sample Group: S_Semola	Found in Sample Group: 4_AG77Neolatino	Found in Sample Group: 3_AG69Lloyd	Found in Sample Group: SI_SemolaIntegrale	Found in Sample Group: 2_AG33Colosseo	XCorr Sequest HT	Charge Sequest HT	m/z [Da] Sequest HT	DeltaM [ppm] Sequest HT	RT [min] Sequest HT
	H	CSVNVPVY	1xCarbamidomethyl [C1]	22	93	3	A2IBK1; Q8W3X5; A0A2P1BXV0; Q6J6V0; A0A0U3ANN8; A0A346R8U1; R4JAP5; A9YWM3; D3U329; F8SGM9; A0A2R4Q9T1; R4JB62; D5FPF3; A0A0U3AIG6; C8CCM8; A2IBJ9; D5FPE9; A8CA05; F8SGM7; D5FPF4; Q68VI0; F8SGN9	3	937.445	8	NF	NF	H	NF	H	NF	H	1.18	1	937.444	-0.8	16.9848
	H	DAIRAIIY		25	101	217	A2IBK1; Q8W3X5; A0A2P1BXV0; Q6J6V0; A0A0U3ANN8; R4JAP5; A9YWM3; D5FPF1; D3U329; V9P785; F8SGM9; A0A2R4Q9T1; R4JB62; D5FPF3; A0A0U3AIG6; Q41552; C8CCM8; A2IBJ9; D5FPE9; A8CA05; F8SGM7; D5FPF4; Q68VI0; F8SGN9; B8Y0L6	0	934.536	8	H	H	H	H	H	H	H	2.32	2	467.772	0.44	19.2101
	H	GQWPQQQQVPQGTL		22	88	15	A2IBK1; Q8W3X5; A0A2P1BXV0; Q6J6V0; A0A0U3ANN8; R4JAP5; A9YWM3; D3U329; V9P785; F8SGM9; A0A2R4Q9T1; R4JB62; D5FPF3; A0A0U3AIG6; C8CCM8; A2IBJ9; A8CA05; F8SGM7; D5FPF4; Q68VI0; F8SGN9; B8Y0L6	1	1594.8	14	H	H	H	H	H	H	H	2.49	2	797.901	-1.57	19.641
	H	GQWPQQQQVPQGTLLQPHQIAQL		20	86	3	A2IBK1; Q8W3X5; A0A2P1BXV0; Q6J6V0; A0A0U3ANN8; R4JAP5; A9YWM3; D3U329; V9P785; F8SGM9; A0A2R4Q9T1; R4JB62; D5FPF3; A0A0U3AIG6; C8CCM8; A2IBJ9; A8CA05; D5FPF4; Q68VI0; F8SGN9	3	2623.37	23	NF	NF	NF	H	H	NF	NF	1.39	3	875.128	-1.24	25.9172
	H	GTTTIVPF		12	67	14	Q8W3X5; A0A2P1BXV0; A0A0U3ANN8; F8SGM9; R4JB62; C8CCM8; A2IBJ9; A8CA05; F8SGM7; D5FPF4; Q68VI0; F8SGN9	0	835.456	8	H	H	H	H	H	H	H	1.56	1	835.456	0.58	24.7638
	H	GVGTRVGAY		18	72	20	A2IBK1; Q8W3X5; A0A2P1BXV0; A0A0U3ANN8; R4JAP5; A9YWM3; D5FPF1; D3U329; F8SGM9; R4JB62; D5FPF3; C8CCM8; A2IBJ9; A8CA05; F8SGM7; D5FPF4; F8SGN9; B8Y0L6	0	879.468	9	H	H	H	H	H	H	H	1.63	2	440.237	-1.23	3.9266
	H	LQPHQLAQL		53	256	324	D0F0C5; K7WV80; A9YRN9; C6K8R4; A0A287EFH8; D0ES12; B2LWZ2; G0YLZ2; G9AYK6; A0A2P1BXV0; Q670S2; B5A810; C8CCM7; Q6J6V0; R4JAP5; A9YWM3; D3U329; P93794; J9QFV1; C6K8R8; A0A287EIZ3; F5A7G7; B5A816; Q84NE4; A0A2R4Q9T1; A0A346R8U2; F6KHQ0; Q40026; R4JB62; Q84U17; B5A813; F1C940; A0A0U3AIG6; Q5XXZ9; C8CCM8; D5FPE9; Q9XGF0; A0A287EFG2; A8CA05; Q3YB17; B2LWZ6; A0A346R8T9; Q84U16; A0A346R8T7; A0A2R4Q9V4;…	2	1047.59	9	H	H	H	H	H	H	H	2.76	2	524.301	1.03	10.8766
	H	LQQQCSPVAMPQSL	1xCarbamidomethyl [C5]	33	198	8	R9XVA5; A2IBK1; Q8W3X5; A0A2P1BXV0; D5FPE3; C8CCM7; Q6J6V0; A2IBV5; A9YWM3; D5FPF1; D3U329; V9P785; F8SGM9; Q8W3W8; R4JDM1; A0A2R4Q9T1; K0I5W1; R4JB62; D5FPF3; A0A0U3AGE0; Q41552; Q8W3X4; C8CCM8; A2IBJ9; A8CA05; F8SGM7; D5FPF4; Q68VI0; F8SGN9; Q8W3X0; B2Y2R6; B8Y0L6; A0A0U3ATU4	1	1586.77	14	NF	NF	H	H	H	H	H	1.9	2	793.886	-1	21.583
	H	NQPQQQQPQQSVQGVSQPQQQQKQL		20	82	21	A2IBK1; Q8W3X5; A0A2P1BXV0; Q6J6V0; A0A0U3ANN8; R4JAP5; A9YWM3; D5FPF1; D3U329; V9P785; F8SGM9; A0A2R4Q9T1; R4JB62; Q41552; C8CCM8; A2IBJ9; A8CA05; F8SGM7; F8SGN9; B8Y0L6	0	2887.44	25	H	H	H	H	H	H	H	2.26	3	963.15	-1.6	7.5568
	H	QPHQLAQL		53	256	14	D0F0C5; K7WV80; A9YRN9; C6K8R4; A0A287EFH8; D0ES12; B2LWZ2; G0YLZ2; G9AYK6; A0A2P1BXV0; Q670S2; B5A810; C8CCM7; Q6J6V0; R4JAP5; A9YWM3; D3U329; P93794; J9QFV1; C6K8R8; A0A287EIZ3; F5A7G7; B5A816; Q84NE4; A0A2R4Q9T1; A0A346R8U2; F6KHQ0; Q40026; R4JB62; Q84U17; B5A813; F1C940; A0A0U3AIG6; Q5XXZ9; C8CCM8; D5FPE9; Q9XGF0; A0A287EFG2; A8CA05; Q3YB17; B2LWZ6; A0A346R8T9; Q84U16; A0A346R8T7; A0A2R4Q9V4;…	1	934.51	8	H	NF	H	H	H	H	H	1.53	2	467.759	0.32	5.8896
	H	QQPQQQQL		26	108	96	G0YLZ2; A2IBK1; Q8W3X5; A0A2P1BXV0; A0A0U3ANN8; Q5XXZ7; R4JAP5; A9YWM3; D5FPF1; V9P785; F8SGM9; R4JB62; D5FPF3; A0A0U3AGE0; A0A0U3AIG6; C8CCM8; A2IBJ9; D5FPE9; A8CA05; F8SGM7; D4HNA5; D5FPF4; F5A7G6; Q68VI0; F8SGN9; B8Y0L6	0	997.506	8	H	H	H	H	H	H	H	2.65	1	997.505	-0.95	3.8091
	H	QQPQQQQL	1xGln->pyro-Glu [N-Term]	25	103	5	G0YLZ2; A2IBK1; Q8W3X5; A0A2P1BXV0; A0A0U3ANN8; Q5XXZ7; R4JAP5; A9YWM3; D5FPF1; V9P785; F8SGM9; R4JB62; D5FPF3; A0A0U3AIG6; C8CCM8; A2IBJ9; D5FPE9; A8CA05; F8SGM7; D4HNA5; D5FPF4; F5A7G6; Q68VI0; F8SGN9; B8Y0L6	0	980.48	8	NF	NF	NF	NF	H	H	H	1.55	2	490.743	-0.23	11.7416
	H	QQQPIPL		17	76	166	A2IBK1; Q8W3X5; A0A2P1BXV0; A0A0U3ANN8; A9YWM3; V9P785; F8SGM9; R4JB62; C8CCM8; A2IBJ9; A8CA05; F8SGM7; A7X9Y0; D5FPF4; Q68VI0; F8SGN9; B8Y0L6	0	823.467	7	H	H	H	H	H	H	H	1.76	1	823.466	-0.9	16.4551
	H	QQQPLPL	1xGln->pyro-Glu [N-Term]	17	76	42	A2IBK1; Q8W3X5; A0A2P1BXV0; A0A0U3ANN8; A9YWM3; V9P785; F8SGM9; R4JB62; C8CCM8; A2IBJ9; A8CA05; F8SGM7; A7X9Y0; D5FPF4; Q68VI0; F8SGN9; B8Y0L6	1	806.441	7	H	NF	H	H	H	H	H	1.05	1	806.44	-0.23	27.8002
	H	QQQPLPLQQILW		17	74	22	A2IBK1; Q8W3X5; A0A2P1BXV0; A0A0U3ANN8; A9YWM3; V9P785; F8SGM9; R4JB62; C8CCM8; A2IBJ9; A8CA05; F8SGM7; A7X9Y0; D5FPF4; Q68VI0; F8SGN9; B8Y0L6	3	1491.83	12	NF	NF	H	H	H	H	H	2.41	2	746.419	-0.73	38.6784
	H	RTLPTM		48	251	45	D0F0C5; N1R0S5; K7WV72; J9QEK9; A9YRN9; C6K8R4; G0YLZ2; A0A2P1BXV0; W8E197; W8E194; I3QPG3; W8E1A2; B5A810; C8CCM7; R4JFH5; Q5XXZ7; R4JAP5; A9YWM3; Q6J6U9; A0A2R4Q9T7; J9QFV1; W8E6H6; H8Y0M0; B5A816; W8E2L7; F6KHQ0; R4JB62; W8E6G7; B5A813; K7XED4; D7RFI1; C8CCM8; W8E0F4; A0A2R4Q9U1; A0A2R4Q9S8; W8E5R1; Q9XGF0; A8CA05; Q84U16; Q6B780; A0A346R8T7; A8IEC6; A0A0K2GRQ1; A0A2R4Q9S5; B6UKQ7; X2JC88; A8I…	1	718.392	6	H	H	H	H	H	H	H	1.27	1	718.39	-2.41	5.4248
	H	RTLPTMCSVNVPVY	1xCarbamidomethyl [C7]	16	71	34	A2IBK1; Q8W3X5; A0A2P1BXV0; A0A0U3ANN8; R4JAP5; A9YWM3; F8SGM9; R4JB62; D5FPF3; C8CCM8; A2IBJ9; A8CA05; F8SGM7; D5FPF4; Q68VI0; F8SGN9	1	1636.82	14	H	H	H	H	H	H	H	2.98	2	818.912	-0.76	21.4662
	H	RTLPTMCSVNVPVY	1xOxidation [M6]; 1xCarbamidomethyl [C7]	16	71	9	A2IBK1; Q8W3X5; A0A2P1BXV0; A0A0U3ANN8; R4JAP5; A9YWM3; F8SGM9; R4JB62; D5FPF3; C8CCM8; A2IBJ9; A8CA05; F8SGM7; D5FPF4; Q68VI0; F8SGN9	1	1652.81	14	H	NF	NF	H	H	NF	H	2.36	2	826.909	-1.08	16.5473
	H	RTLPTMCSVNVPVYGTTTIVPF	1xCarbamidomethyl [C7]	12	65	51	Q8W3X5; A0A2P1BXV0; A0A0U3ANN8; F8SGM9; R4JB62; C8CCM8; A2IBJ9; A8CA05; F8SGM7; D5FPF4; Q68VI0; F8SGN9	2	2453.26	22	H	H	H	H	H	H	H	3.94	2	1227.13	-0.53	32.7605
	H	SIVLQEQQHGQGL		13	73	76	A2IBK1; Q8W3X5; A0A2P1BXV0; A0A0U3ANN8; A9YWM3; V9P785; F8SGM9; R4JB62; C8CCM8; A2IBJ9; A8CA05; F8SGM7; D5FPF4	1	1436.75	13	H	H	H	H	H	H	H	3.2	2	718.878	0.24	12.2673
	H	SIVLQEQQHGQGLNQPQQQQPQQSVQGVSQPQQQQKQL	1xDeamidated [Q]	12	60	7	A2IBK1; Q8W3X5; A0A2P1BXV0; A0A0U3ANN8; A9YWM3; V9P785; F8SGM9; R4JB62; C8CCM8; A2IBJ9; A8CA05; F8SGM7	2	4306.16	38	NF	NF	NF	NF	NF	H	NF	1.02	3	1436.06	-0.21	13.363
	H	SQQQPPF		36	253	26	K7WV80; A0A3G3C4J5; K7WV72; B8XU59; P93792; Q8W3X5; A0A2P1BXV0; Q8W3V8; C8CCM7; Q6J6V0; R4JAP5; A9YWM3; D2DII6; D3U329; R4JFK3; R4JDM1; Q5MFK8; I3QPH1; A0A2R4Q9T1; A0A346R8U2; R4JB62; F1C940; A0A0U3AIG6; Q41552; K7XED4; D7RFI1; C8CCM8; F8SGM2; R4JD66; D5FPE9; A8CA05; A0A346R8T9; Q6B780; A0A2R4Q9V4; B2LX00; C6KI73	0	831.4	7	H	H	H	H	H	H	H	1.48	1	831.399	-1.26	10.1053
	H	SQQQQPPF		42	254	83	N1R0S5; A0A165R8I1; A9YRN9; B2LWZ2; A0A0A0R2J7; G9AYK6; A0A2P1BXV0; B5A810; C8CCM7; Q6J6V0; R4JFH5; Q5XXZ7; A9YWM3; Q6J6U9; A0A2R4Q9T7; D3U329; P93794; A0A0A0R2I8; B5A816; Q84NE4; A0A2R4Q9T1; Q2PQJ6; D0ES19; B5A813; A0A0U3AIG6; C8CCM8; D5FPE9; A0A2R4Q9U1; Q9XGF0; A8CA05; B2LWZ6; A0A346R8T9; Q84U16; T1LG74; A0A346R8T7; A0A346R8T6; A0A089VKK4; Q2L990; A0A0A0QYP7; A0A2R4Q9S5; B8XU51; X2JC88	0	959.458	8	H	H	H	H	H	H	H	2.1	2	480.233	-0.32	10.2887
TRUE	Master Protein	I0IT57	Alpha/beta-gliadin OS=Triticum aestivum OX=4565 GN=Gli-2 PE=4 SV=1	78.6207	34	1632	3	1	290	33.4	7.71	H	H	H	H	H	H	H	1169.64	34
	Confidence	Sequence	Modifications	# Protein Groups	# Proteins	# PSMs	Master Protein Accessions	# Missed Cleavages	Theo. MH+ [Da]	Sequence Length	Found in Sample Group: 1_AG38Duetto	Found in Sample Group: 5_AG167PI	Found in Sample Group: S_Semola	Found in Sample Group: 4_AG77Neolatino	Found in Sample Group: 3_AG69Lloyd	Found in Sample Group: SI_SemolaIntegrale	Found in Sample Group: 2_AG33Colosseo	XCorr Sequest HT	Charge Sequest HT	m/z [Da] Sequest HT	DeltaM [ppm] Sequest HT	RT [min] Sequest HT
	H	ALQTLPAMCNVY	1xCarbamidomethyl [C9]	25	250	84	A0A0E3Z552; G9I1R6; G9I1R5; A0A1P8DT82; A0A1P8DTB0; A0A0E3URC4; G9I1S5; A0A1P8DSN6; A8VZI4; H8Y0G8; D2X6C9; M8AS61; A9YRP1; Q0GK30; A0A1P8DSE3; M4WER7; A9YRP3; I0IT53; A0A0E3UQX9; I0IT57; X2KWD8; A0A1P8DT27; I0IT59; A9Z0K0; A0A0E3Z7K2	2	1380.67	12	H	H	H	H	H	H	H	2.23	2	690.836	-0.04	26.2605
	H	CCQQLW	2xCarbamidomethyl [C1; C2]	34	250	44	A0A2R2Y432; Q2QL54; U3PUB1; I3RXY0; B5AH62; M4WH49; I3RXV8; A0A0E3URC2; G9I1S5; I3RXY2; Q2QL52; A0A0E3Z5J4; A8VZI4; A7LHC5; A0A291I1T3; M4WYH4; E0Z2G0; Q2QL42; A5JSA3; H8Y0E6; H8Y0H4; A9YRP1; U3PXH9; M4WER7; A9YRP3; R9XUL8; I0IT57; I3RXW9; Q2QL55; E0Z2G8; H8Y0E7; I0IT59; A9Z0K0; G9I1R9	1	894.36	6	H	H	H	H	H	H	H	1.45	1	894.359	-1.15	18.2015
	H	CSTTIAPF	1xCarbamidomethyl [C1]	29	195	20	A0A2R2Y432; A0A142L078; G9I1R6; H8Y0G1; I0IT58; B5AH62; M4WH49; H8Y0F3; B1PDK7; A0A1P8DSN6; A0A0E3URD6; B8XU29; A0A0E3Z5J4; K4NYM6; A0A1P8DT06; A0A0K2QJ82; M8AS61; H8Y0H4; A9YRP1; A0A0K2QJD8; A0A1P8DSE3; I0IT53; I0IT57; F4YT75; A0A023WGX2; A0A1P8DTC2; E5FF17; I0IT59; A0A1P8DSB7	0	896.418	8	H	H	H	H	H	H	H	1.33	1	896.417	-1.04	19.929
	H	FQPSQQNPQAQGF		5	12	41	I0IT58; I0IT53; I0IT57; A0A023WGX2; I0IT59	1	1476.69	13	H	H	H	H	H	H	H	2.53	2	738.846	-0.78	13.8888
	H	GIMSTN		5	14	63	I0IT58; I0IT53; I0IT57; A0A023WGX2; I0IT59	0	622.286	6	H	H	H	H	H	H	H	1.82	1	622.286	-1.16	5.1001
	H	IHNVIHA		6	23	4	I0IT58; B1PDK7; A0A1P8DSN6; I0IT53; I0IT57; I0IT59	3	803.452	7	NF	H	NF	NF	NF	NF	NF	1.06	2	402.229	-1.28	3.1759
	H	IPCRDVVL	1xCarbamidomethyl [C3]	33	250	45	A0A2R2Y432; A0A0E3Z552; G9I1R6; U3PUB1; G9I1R5; I3RXY0; R9XST5; B5AH62; I3RXV8; A0A1P8DTB0; A0A0E3URC2; G9I1S5; I3RXY2; Q2QL52; A7LHC5; A0A2R2Y404; A0A291I1T3; M4WYH4; E0Z2G0; Q2QL42; A5JSA3; H8Y0E6; H8Y0H4; U3PXH9; R9XUL8; I0IT53; I0IT57; I3RXW9; B9VSJ1; E0Z2G8; H8Y0E7; I0IT59; G9I1R9	0	971.534	8	H	H	H	H	H	H	H	1.93	2	486.271	0.4	11.7739
	H	LALM		27	1010	73	C5X0W4; A0A2K2DMH5; M8AC73; A0A194YSK1; W5CW51; A0A2K2CGP1; N1QV27; M8C353; K3Y4Z0; A0A2K2D0X5; A0A1D6GTZ9; A0A1D6IQA6; A0A2K2D5C6; A0A3L6DXP8; R7W5R4; I1ISW0; A0A287IJV0; A0A077S149; M8AMD0; I0IT57; A0A1D6HNG1; A0A1D6E2B4; A0A0Q3FXQ4; Q84SW8; R7VZ46; J3N534; F2CTB9	2	447.264	4	H	H	H	H	H	H	H	1.06	1	447.263	-0.31	13.2376
	H	LGQQQQQFPGQQQPFPPQQPYPQPQPF	1xDeamidated [Q]	4	10	42	I0IT53; I0IT57; A0A023WGX2; I0IT59	4	3164.52	27	NF	H	H	H	NF	H	H	1.31	3	1055.52	5.89	29.9358
	H	LGQQQQQFPGQQQPFPPQQPYPQPQPF		4	10	126	I0IT53; I0IT57; A0A023WGX2; I0IT59	4	3163.54	27	H	H	H	H	H	H	H	2.91	3	1055.18	-0.58	27.9021
	H	LPQLPYPQPQPF		13	73	19	I0IT58; A0A1K0ITF9; M4WH49; A0A1P8DSN6; A0A1K0K0Q0; G9I1T5; A8VZI4; A0A2R2Y404; I0IT53; I0IT57; A0A023WGX2; Q2QL53; I0IT59	3	1424.76	12	NF	NF	H	NF	H	H	NF	2.16	2	712.882	-0.87	30.8953
	H	QILQQL	1xGln->pyro-Glu [N-Term]	36	254	26	A0A2R2Y432; A0A0A9LIL8; A0A0E3Z552; Q2QL54; A0A142L078; G9I1R6; I0IT58; A0A1K0ITF9; G9I1R5; A0A0E3URC4; A0A1P8DSN6; A0A1K0K0Q0; H8Y0G3; G9I1T5; A0A0E3Z5J4; A0A0E3UQY6; A0A2R2Y404; K4NYM6; A0A1P8DS55; A0A0K2QJ82; A0A1K0ISY9; M8AS61; Q1WA40; A0A0K2QJD8; A7LHB8; I0IT53; A0A142L083; I0IT57; X2L2G3; X2KWD8; X2KWE1; Q2QL53; I0IT59; K4PC84	1	725.419	6	NF	H	H	H	NF	H	NF	1.25	1	725.419	-0.71	36.2048
	H	QQILQQQLIPCRDVVL	1xCarbamidomethyl [C11]	30	250	4	A0A2R2Y432; A0A0E3Z552; Q2QL54; G9I1R6; U3PUB1; G9I1R5; I3RXY0; R9XST5; I3RXV8; A0A1P8DTB0; A0A0E3URC2; I3RXY2; Q2QL52; A7LHC5; A0A291I1T3; M4WYH4; E0Z2G0; Q2QL42; A5JSA3; H8Y0E6; U3PXH9; M4WER7; R9XUL8; I0IT53; I0IT57; X2L2G3; I3RXW9; E0Z2G8; I0IT59; G9I1R9	2	1951.08	16	NF	H	H	NF	NF	H	NF	1.76	2	976.043	-0.35	26.5051
	H	QQPNIAHASSQVSQQSY		3	14	27	I0IT58; I0IT57; I0IT59	0	1872.88	17	H	H	H	H	H	H	H	3.09	2	936.944	-0.98	8.9669
	H	QQPQQQYPSGQGF		9	69	120	I0IT58; A7LHC6; A0A023WGF7; I0IT53; I0IT57; F4YT75; A0A023WGX2; I0IT59; R9XSU5	1	1492.68	13	H	H	H	H	H	H	H	3.71	2	746.844	-0.71	13.0623
	H	QQQLIPCRDVVL	1xCarbamidomethyl [C7]	33	250	98	A0A2R2Y432; A0A0E3Z552; Q2QL54; G9I1R6; U3PUB1; G9I1R5; I3RXY0; R9XST5; I3RXV8; A0A1P8DTB0; A0A0E3URC2; G9I1S5; I3RXY2; Q2QL52; A7LHC5; A0A291I1T3; M4WYH4; E0Z2G0; Q2QL42; A5JSA3; H8Y0E6; U3PXH9; M4WER7; R9XUL8; I0IT53; I0IT57; X2L2G3; I3RXW9; B9VSJ1; E0Z2G8; H8Y0E7; I0IT59; G9I1R9	1	1468.79	12	H	H	H	H	H	H	H	3.19	2	734.9	-0.79	20.3889
	H	QQQLIPCRDVVL	1xGln->pyro-Glu [N-Term]; 1xCarbamidomethyl [C7]	33	250	33	A0A2R2Y432; A0A0E3Z552; Q2QL54; G9I1R6; U3PUB1; G9I1R5; I3RXY0; R9XST5; I3RXV8; A0A1P8DTB0; A0A0E3URC2; G9I1S5; I3RXY2; Q2QL52; A7LHC5; A0A291I1T3; M4WYH4; E0Z2G0; Q2QL42; A5JSA3; H8Y0E6; U3PXH9; M4WER7; R9XUL8; I0IT53; I0IT57; X2L2G3; I3RXW9; B9VSJ1; E0Z2G8; H8Y0E7; I0IT59; G9I1R9	1	1451.77	12	H	H	H	H	H	H	H	2.34	2	726.387	-1.18	28.8486
	H	QQQQQQQQQQQIL		4	24	43	A0A368S0H4; I0IT57; A5JSB8; A0A2T7E5V3	0	1653.83	13	H	H	H	H	H	H	H	3.16	2	827.418	-0.93	9.563
	H	QTLPAMCNVY	1xCarbamidomethyl [C7]	27	251	5	A0A0E3Z552; G9I1R6; G9I1R5; A0A1P8DT82; A0A1P8DTB0; A0A0E3URC4; G9I1S5; A0A1P8DSN6; A0A1P8DSH1; A8VZI4; A0A1P8DSY8; H8Y0G8; D2X6C9; M8AS61; A9YRP1; Q0GK30; A0A1P8DSE3; M4WER7; A9YRP3; I0IT53; A0A0E3UQX9; I0IT57; X2KWD8; A0A1P8DT27; I0IT59; A9Z0K0; A0A0E3Z7K2	1	1196.54	10	NF	H	H	H	NF	H	NF	1.45	2	598.775	-1	21.3197
	H	VQPQQLPQFQEIRNL	1xDeamidated [Q/N]	1	2	317	I0IT57	2	1838.98	15	H	H	H	H	H	H	H	3.72	3	613.663	-0.96	26.5798
	H	VQPQQLPQFQEIRNL		1	2	37	I0IT57	2	1837.99	15	H	H	H	H	H	H	H	2.71	2	919.499	-0.55	25.8681
	H	VRVPVPQLQPQNPSQQQPQEQVPL		27	253	373	A0A2R2Y432; G9I1R6; I3RXY0; A0A1P8DT82; R9XST5; I3RXV8; A0A1P8DTB0; A0A0E3URC4; A0A0E3URC2; Q41533; Q2QL52; A0A1P8DSH1; A0A0E3Z5J4; A0A291I1T3; M4WYH4; E0Z2G0; Q2QL42; A5JSA3; U3PXH9; Q0GK30; I0IT53; I0IT57; I3RXW9; H8Y0E7; I0IT59; G9I1R9; A0A0E3Z7K2	1	2734.46	24	H	H	H	H	H	H	H	5.68	2	1367.74	-0.2	23.137
	H	XPPY		48	754	523	A0A2R2Y432; A0A1D6PVA1; U3PUB1; I3RXY0; R9XST5; I3RXV8; N1QY29; A0A1D6PVM1; B6SIP3; Q2QW32; A0A1D6KZ84; G9I1S5; A0A1D6HD02; C5YAM7; A0A0Q3EYP3; I3RXY2; Q8H344; A0A0E3Z5J4; A7LHC5; A0A2R2Y404; A0A291I1T3; A0A2K2CRT5; Q0IS09; M4WYH4; E0Z2G0; H8Y0D1; A5JSA3; M8D541; K7VGB7; K7VQS8; M8AS61; A0A194YQ58; U3PXH9; Q0GK30; A0A1D6GM06; R9XUL8; I0IT53; A0A1D6PVH3; I1J1J8; I0IT57; I3RXW9; B6SII5; E0Z2G8; I0I…	0	489.271	4	H	H	H	H	H	H	H	1.33	1	489.271	-0.08	9.3314
TRUE	Master Protein	V9P785	LMW-m glutenin subunit 50 (Fragment) OS=Triticum aestivum OX=4565 GN=LMW-m PE=4 SV=1	89.0625	47	1352	7	1	320	36.8	8.21	H	H	H	H	H	H	H	1162.93	47
	Confidence	Sequence	Modifications	# Protein Groups	# Proteins	# PSMs	Master Protein Accessions	# Missed Cleavages	Theo. MH+ [Da]	Sequence Length	Found in Sample Group: 1_AG38Duetto	Found in Sample Group: 5_AG167PI	Found in Sample Group: S_Semola	Found in Sample Group: 4_AG77Neolatino	Found in Sample Group: 3_AG69Lloyd	Found in Sample Group: SI_SemolaIntegrale	Found in Sample Group: 2_AG33Colosseo	XCorr Sequest HT	Charge Sequest HT	m/z [Da] Sequest HT	DeltaM [ppm] Sequest HT	RT [min] Sequest HT
	H	DAIRAIIY		25	101	217	A2IBK1; Q8W3X5; A0A2P1BXV0; Q6J6V0; A0A0U3ANN8; R4JAP5; A9YWM3; D5FPF1; D3U329; V9P785; F8SGM9; A0A2R4Q9T1; R4JB62; D5FPF3; A0A0U3AIG6; Q41552; C8CCM8; A2IBJ9; D5FPE9; A8CA05; F8SGM7; D5FPF4; Q68VI0; F8SGN9; B8Y0L6	0	934.536	8	H	H	H	H	H	H	H	2.32	2	467.772	0.44	19.2101
	H	GQWPQQQQVPQGTL		22	88	15	A2IBK1; Q8W3X5; A0A2P1BXV0; Q6J6V0; A0A0U3ANN8; R4JAP5; A9YWM3; D3U329; V9P785; F8SGM9; A0A2R4Q9T1; R4JB62; D5FPF3; A0A0U3AIG6; C8CCM8; A2IBJ9; A8CA05; F8SGM7; D5FPF4; Q68VI0; F8SGN9; B8Y0L6	1	1594.8	14	H	H	H	H	H	H	H	2.49	2	797.901	-1.57	19.641
	H	GQWPQQQQVPQGTLLQPHQIAQL		20	86	3	A2IBK1; Q8W3X5; A0A2P1BXV0; Q6J6V0; A0A0U3ANN8; R4JAP5; A9YWM3; D3U329; V9P785; F8SGM9; A0A2R4Q9T1; R4JB62; D5FPF3; A0A0U3AIG6; C8CCM8; A2IBJ9; A8CA05; D5FPF4; Q68VI0; F8SGN9	3	2623.37	23	NF	NF	NF	H	H	NF	NF	1.39	3	875.128	-1.24	25.9172
	H	LPQQPPFSQQQPPF		11	66	12	Q8W3X5; A0A2P1BXV0; A0A0U3ANN8; A9YWM3; V9P785; F8SGM9; R4JB62; A0A0U3AIG6; F8SGM7; D5FPF4; B8Y0L6	2	1638.83	14	NF	NF	H	H	H	H	H	2.28	2	819.917	-0.39	25.3965
	H	LPQQPPFSQQQPPFSQQQQQPPFSQQQQQPILL		1	18	17	V9P785	5	3870.96	33	NF	NF	H	H	H	NF	H	2.84	3	1290.99	0.65	33.7704
	H	LQQPPFSQHQQPVLPQQQIPSVQPSIL		3	21	16	A2IBK1; V9P785; A2IBJ9	3	3062.64	27	NF	NF	H	H	H	NF	H	2.52	3	1021.55	0.66	27.7387
	H	LQQQCSPVAMPQSL	1xCarbamidomethyl [C5]	33	198	8	R9XVA5; A2IBK1; Q8W3X5; A0A2P1BXV0; D5FPE3; C8CCM7; Q6J6V0; A2IBV5; A9YWM3; D5FPF1; D3U329; V9P785; F8SGM9; Q8W3W8; R4JDM1; A0A2R4Q9T1; K0I5W1; R4JB62; D5FPF3; A0A0U3AGE0; Q41552; Q8W3X4; C8CCM8; A2IBJ9; A8CA05; F8SGM7; D5FPF4; Q68VI0; F8SGN9; Q8W3X0; B2Y2R6; B8Y0L6; A0A0U3ATU4	1	1586.77	14	NF	NF	H	H	H	H	H	1.9	2	793.886	-1	21.583
	H	NQPQQQQPQQSVQGVSQPQQQQKQL		20	82	21	A2IBK1; Q8W3X5; A0A2P1BXV0; Q6J6V0; A0A0U3ANN8; R4JAP5; A9YWM3; D5FPF1; D3U329; V9P785; F8SGM9; A0A2R4Q9T1; R4JB62; Q41552; C8CCM8; A2IBJ9; A8CA05; F8SGM7; F8SGN9; B8Y0L6	0	2887.44	25	H	H	H	H	H	H	H	2.26	3	963.15	-1.6	7.5568
	H	QQPPFSQHQQPVLPQQQIPSVQPSIL	1xGln->pyro-Glu [N-Term]	3	21	35	A2IBK1; V9P785; A2IBJ9	2	2932.53	26	NF	NF	H	H	H	H	H	2.86	2	1466.77	1.32	32.439
	H	QQPPFSQHQQPVLPQQQIPSVQPSIL	1xGln->pyro-Glu [N-Term]; 1xDeamidated [Q]	3	21	12	A2IBK1; V9P785; A2IBJ9	2	2933.52	26	NF	NF	H	H	H	H	NF	1.76	2	1467.27	6.27	32.1792
	H	QQPPFSQHQQPVLPQQQIPSVQPSIL		3	21	155	A2IBK1; V9P785; A2IBJ9	2	2949.56	26	NF	NF	H	H	H	H	H	5.47	3	983.857	-1.07	26.6665
	H	QQPQQQQL		26	108	96	G0YLZ2; A2IBK1; Q8W3X5; A0A2P1BXV0; A0A0U3ANN8; Q5XXZ7; R4JAP5; A9YWM3; D5FPF1; V9P785; F8SGM9; R4JB62; D5FPF3; A0A0U3AGE0; A0A0U3AIG6; C8CCM8; A2IBJ9; D5FPE9; A8CA05; F8SGM7; D4HNA5; D5FPF4; F5A7G6; Q68VI0; F8SGN9; B8Y0L6	0	997.506	8	H	H	H	H	H	H	H	2.65	1	997.505	-0.95	3.8091
	H	QQPQQQQL	1xGln->pyro-Glu [N-Term]	25	103	5	G0YLZ2; A2IBK1; Q8W3X5; A0A2P1BXV0; A0A0U3ANN8; Q5XXZ7; R4JAP5; A9YWM3; D5FPF1; V9P785; F8SGM9; R4JB62; D5FPF3; A0A0U3AIG6; C8CCM8; A2IBJ9; D5FPE9; A8CA05; F8SGM7; D4HNA5; D5FPF4; F5A7G6; Q68VI0; F8SGN9; B8Y0L6	0	980.48	8	NF	NF	NF	NF	H	H	H	1.55	2	490.743	-0.23	11.7416
	H	QQQPIPL		17	76	166	A2IBK1; Q8W3X5; A0A2P1BXV0; A0A0U3ANN8; A9YWM3; V9P785; F8SGM9; R4JB62; C8CCM8; A2IBJ9; A8CA05; F8SGM7; A7X9Y0; D5FPF4; Q68VI0; F8SGN9; B8Y0L6	0	823.467	7	H	H	H	H	H	H	H	1.76	1	823.466	-0.9	16.4551
	H	QQQPLPL	1xGln->pyro-Glu [N-Term]	17	76	42	A2IBK1; Q8W3X5; A0A2P1BXV0; A0A0U3ANN8; A9YWM3; V9P785; F8SGM9; R4JB62; C8CCM8; A2IBJ9; A8CA05; F8SGM7; A7X9Y0; D5FPF4; Q68VI0; F8SGN9; B8Y0L6	1	806.441	7	H	NF	H	H	H	H	H	1.05	1	806.44	-0.23	27.8002
	H	QQQPLPLQQILW		17	74	22	A2IBK1; Q8W3X5; A0A2P1BXV0; A0A0U3ANN8; A9YWM3; V9P785; F8SGM9; R4JB62; C8CCM8; A2IBJ9; A8CA05; F8SGM7; A7X9Y0; D5FPF4; Q68VI0; F8SGN9; B8Y0L6	3	1491.83	12	NF	NF	H	H	H	H	H	2.41	2	746.419	-0.73	38.6784
	H	SIVLQEQQHGQGL		13	73	76	A2IBK1; Q8W3X5; A0A2P1BXV0; A0A0U3ANN8; A9YWM3; V9P785; F8SGM9; R4JB62; C8CCM8; A2IBJ9; A8CA05; F8SGM7; D5FPF4	1	1436.75	13	H	H	H	H	H	H	H	3.2	2	718.878	0.24	12.2673
	H	SIVLQEQQHGQGLNQPQQQQPQQSVQGVSQPQQQQKQL	1xDeamidated [Q]	12	60	7	A2IBK1; Q8W3X5; A0A2P1BXV0; A0A0U3ANN8; A9YWM3; V9P785; F8SGM9; R4JB62; C8CCM8; A2IBJ9; A8CA05; F8SGM7	2	4306.16	38	NF	NF	NF	NF	NF	H	NF	1.02	3	1436.06	-0.21	13.363
	H	SQHQQPVLPQQQIPSVQPSIL		12	68	55	A2IBK1; Q8W3X5; A0A2P1BXV0; V9P785; F8SGM9; R4JB62; A2IBJ9; A8CA05; F8SGM7; D5FPF4; F8SGN9; B8Y0L6	1	2352.27	21	H	H	H	H	H	H	H	4.59	2	1176.64	-0.05	23.8399
	H	SQQQPPFSQQQQQPPFSQQQQQPILL		1	19	27	V9P785	3	3063.53	26	NF	NF	H	H	H	H	H	3.11	3	1021.85	-0.43	29.4618
	H	SQQQQPILPQQPPFSQQQQQFPQQQQPL	1xDeamidated [Q]	1	12	17	V9P785	4	3330.65	28	H	NF	NF	H	H	NF	H	1.42	3	1110.89	0.83	25.6366
	H	SQQQQPLLPQQPPF		6	50	12	C8CCM7; V9P785; R4JB62; A7X9Y0; D5FPF4; A0A0U3ATU4	2	1635.85	14	NF	NF	NF	H	H	NF	H	1.67	2	818.428	-0.68	24.9156
	H	SQQQQPPFSQQQPPFSQQQQPL		1	13	86	V9P785	2	2581.24	22	H	H	H	H	H	H	H	1.9	3	861.086	-0.18	22.1595
	H	SQQQQQFPQQQQPL		9	56	3	A2IBK1; A0A2P1BXV0; A0A0U3ANN8; V9P785; F8SGM9; A2IBJ9; A8CA05; F8SGM7; F8SGN9	1	1712.84	14	NF	NF	NF	H	H	NF	NF	1.65	2	856.92	-1.03	13.6968
	H	SQQQQQPILL		2	21	21	V9P785; A0A0U3AIG6	1	1182.65	10	NF	NF	H	H	H	H	H	2.37	2	591.827	-0.38	19.7179
	H	SQQQQQPLL		12	67	4	D3UAL8; A0A2P1BXV0; R4JAP5; V9P785; F8SGM9; R4JDM1; D5FPF3; A0A0U3AIG6; D5FPE9; F8SGM7; B2LWZ6; B2Y2R6	1	1069.56	9	NF	NF	NF	H	NF	NF	H	1.12	2	535.286	0.68	11.0239
	H	SQQQQQPPFSQQQQQPIL		4	39	4	A0A2P1BXV0; V9P785; F8SGM9; F8SGM7	2	2138.06	18	NF	NF	NF	NF	H	NF	H	1.58	2	1069.53	-0.67	20.8326
	H	SQQQQQPPFSQQQQQPILL		1	19	23	V9P785	2	2251.15	19	NF	NF	H	H	H	H	H	2.92	2	1126.08	0.2	26.1225
	H	YQQQQPIQQQPQPF		13	65	7	A2IBK1; Q8W3X5; A0A2P1BXV0; V9P785; F8SGM9; R4JB62; A2IBJ9; A8CA05; F8SGM7; A7X9Y0; Q68VI0; F8SGN9; B8Y0L6	1	1757.86	14	NF	NF	H	H	H	NF	H	1.72	2	879.434	-0.44	16.7584
	H	YQQQQPIQQQPQPFPQQPPCSQQQQPPLSQQQQPPF	1xDeamidated [Q]; 1xCarbamidomethyl [C20]	9	48	4	A2IBK1; Q8W3X5; A0A2P1BXV0; V9P785; F8SGM9; A8CA05; F8SGM7; F8SGN9; B8Y0L6	3	4313.05	36	H	NF	NF	NF	NF	NF	NF	1.09	3	1438.36	6.67	24.9959
	H	YQQQQPIQQQPQPFPQQPPCSQQQQPPLSQQQQPPF	2xDeamidated [Q]; 1xCarbamidomethyl [C20]	9	48	3	A2IBK1; Q8W3X5; A0A2P1BXV0; V9P785; F8SGM9; A8CA05; F8SGM7; F8SGN9; B8Y0L6	3	4314.03	36	NF	NF	NF	NF	H	H	NF	1.15	3	1438.7	9.47	25.1866
TRUE	Master Protein	A0A1P8DSI8	Alpha-gliadin storage protein (Fragment) OS=Triticum spelta OX=58933 PE=2 SV=1	57.6389	24	1030	1	1	288	33.2	6.49	H	H	H	H	H	H	H	1155.54	24
	Confidence	Sequence	Modifications	# Protein Groups	# Proteins	# PSMs	Master Protein Accessions	# Missed Cleavages	Theo. MH+ [Da]	Sequence Length	Found in Sample Group: 1_AG38Duetto	Found in Sample Group: 5_AG167PI	Found in Sample Group: S_Semola	Found in Sample Group: 4_AG77Neolatino	Found in Sample Group: 3_AG69Lloyd	Found in Sample Group: SI_SemolaIntegrale	Found in Sample Group: 2_AG33Colosseo	XCorr Sequest HT	Charge Sequest HT	m/z [Da] Sequest HT	DeltaM [ppm] Sequest HT	RT [min] Sequest HT
	H	CCQHLW	2xCarbamidomethyl [C1; C2]	18	250	86	A0A1P8DSI8; Q2QL61; A0A0E3UQX3; A0A1P8DT82; M4WFC9; M4WEQ6; H9NAK8; A0A1P8DSH1; A0A1P8DT06; A0A0E3Z5X0; D2X6C9; Q0GK30; A0A1P8DSE3; A0A1P8DSE0; A0A0E3UQX9; A0A1P8DSG6; A0A1P8DT27; A0A0E3Z7K2	1	903.36	6	H	H	H	H	H	H	H	2.2	2	452.184	0.17	9.5908
	H	CTIAPF	1xCarbamidomethyl [C1]	18	253	140	A0A1P8DSI8; A0A0E3UQX3; M4WFC9; Q41533; M4WEQ6; A0A1P8DSH1; H8Y0D1; A0A1P8DSY8; H8Y0E6; Q0GK30; A0A1P8DSE0; M4WER7; A0A0E3UQX9; A0A1P8DSG6; A0A1P8DT27; H8Y0E7; G9I1R9; A0A0E3Z7K2	0	708.339	6	H	H	H	H	H	H	H	1.84	1	708.338	-0.2	19.4467
	H	GIFGTN		44	372	134	A0A2R2Y432; A0A1P8DSI8; A0A0E3Z552; G9I1R6; U3PUB1; G9I1R5; I3RXY0; A0A1P8DT82; R9XST5; M4WH49; I3RXV8; A0A1P8DTB0; A0A0E3URC4; G9I1S5; A0A1P8DSN6; I3RXY2; A0A1P8DSH1; A0A0E3Z5J4; A7LHC5; A0A291I1T3; M4WYH4; E0Z2G0; H8Y0D1; A5JSA3; A0A1P8DSY8; F5A7H0; H8Y0E6; D2X6C9; M8AS61; A9YRP1; U3PXH9; Q0GK30; A0A1P8DSE3; M4WER7; R9XUL8; A7LHB8; A0A0E3UQX9; X2L2G3; X2KWD8; I3RXW9; E0Z2G8; A0A1P8DT27; H8Y0E7;…	1	608.304	6	H	H	H	H	H	H	H	1.65	1	608.304	0.47	15.7513
	H	GQGSFQPSQQNPQAQGSVQPQQLPQFEEIRNL		3	19	7	A0A1P8DSI8; A0A142L072; A0A1P8DSG6	3	3565.74	32	NF	NF	H	NF	H	H	NF	3.7	3	1189.25	0.05	27.5875
	H	HQQQKQQQQPSSQVSF		15	195	16	A0A1P8DSI8; A0A1P8DT82; Q9M4L8; Q41533; M4WEQ6; H9NAK8; I0CCD0; A0A1P8DT06; A0A023WGB8; A0A0E3Z5X0; Q0GK30; A0A1P8DSE0; R9XU77; A0A1P8DT27; A0A0E3Z5C7	0	1912.93	16	NF	H	H	H	H	H	H	2.1	2	956.964	-2.52	3.4526
	H	IGQQQPFPPQQPYPQPQPFPSQQPY		14	259	699	A0A1P8DSI8; A0A1P8DT82; M4WFC9; I3RXV8; Q41533; A0A1P8DT06; A0A023WGB8; A0A0E3URA8; D2X6C9; A0A0K2QJD8; Q0GK30; A0A1P8DSE3; A0A1P8DSG6; R9XU77	3	2922.42	25	H	H	H	H	H	H	H	4.46	2	1461.71	-0.59	26.6583
	H	IPPYCTIAPF	1xCarbamidomethyl [C5]	18	250	47	A0A1P8DSI8; A0A0E3UQX3; M4WFC9; Q41533; M4WEQ6; A0A1P8DSH1; H8Y0D1; A0A1P8DSY8; H8Y0E6; Q0GK30; M4WER7; A0A0E3UQX9; A0A1P8DSG6; A0A1P8DT27; H8Y0E7; G9I1R9; R9XSU5; A0A0E3Z7K2	1	1178.59	10	H	H	H	H	H	H	H	2.13	1	1178.59	-0.32	30.4528
	H	LGQQQPFPPQQPY		14	259	9	A0A1P8DSI8; A0A1P8DT82; M4WFC9; I3RXV8; Q41533; M4WEQ6; H9NAK8; A0A1P8DT06; A0A023WGB8; D2X6C9; Q0GK30; A0A1P8DSE3; A0A1P8DSG6; A0A0E3Z7K2	2	1527.76	13	NF	NF	H	NF	H	NF	NF	1.04	2	764.38	-3.74	17.7657
	H	LQLQPFPQPQLPY		20	250	73	A0A1P8DSI8; I3RXY0; R9XST5; I3RXV8; G9I1S5; I3RXY2; Q2QL52; A0A291I1T3; M4WYH4; E0Z2G0; Q2QL42; D2X6C9; U3PXH9; Q0GK30; A0A1P8DSE3; R9XUL8; A0A1P8DT67; A0A0E3UQX9; E0Z2G8; A0A0E3Z7K2	4	1568.85	13	H	H	H	H	H	H	H	3.49	2	784.927	-0.42	33.5583
	H	QQYPL		19	265	70	A0A1P8DSI8; A0A0E3UQX3; A0A1P8DT82; Q9M4L8; Q41533; M4WEQ6; H9NAK8; I0CCD0; A0A1P8DT06; H8Y0D1; A0A023WGB8; A0A0E3Z5X0; A0A0N7A547; Q0GK30; A0A1P8DSE0; A0A0E3UR88; A0A0D9XG85; R9XU77; A0A1P8DT27	1	648.335	5	H	H	H	H	H	H	H	1.28	1	648.334	-1.52	11.483
	H	QQYPLGQGSF		17	234	30	A0A1P8DSI8; A0A0E3UQX3; A0A1P8DT82; Q9M4L8; Q41533; M4WEQ6; H9NAK8; I0CCD0; A0A1P8DT06; H8Y0D1; A0A023WGB8; A0A0E3Z5X0; Q0GK30; A0A1P8DSE0; A0A0E3UR88; R9XU77; A0A1P8DT27	2	1124.54	10	H	H	H	H	H	H	H	2.19	1	1124.54	-1.4	20.3788
	H	RPQQPYPQPQPQY		23	250	136	A0A1P8DSI8; U3PUB1; I3RXY0; A0A1P8DT82; R9XST5; I3RXV8; Q2QL52; A7LHC5; A0A291I1T3; M4WYH4; E0Z2G0; Q2QL42; A5JSA3; D2X6C9; U3PXH9; Q0GK30; A0A1P8DSE3; R9XUL8; A0A0E3UQX9; I3RXX8; I3RXW9; A0A1P8DT27; A0A0E3Z7K2	1	1626.8	13	H	H	H	H	H	H	H	3.18	2	813.904	-1.36	8.8088
	H	SQPQPF		16	253	23	A0A1P8DSI8; Q2QL61; A0A1P8DT82; M4WFC9; Q41533; M4WEQ6; H9NAK8; A0A1P8DT06; A0A023WGB8; A0A0E3Z5X0; D2X6C9; Q0GK30; A0A1P8DSE3; A0A0E3UQX9; A0A1P8DT27; A0A0E3Z7K2	0	703.341	6	H	H	H	H	H	H	H	1.67	1	703.341	-0.21	9.3433
	H	XGQQQPFPPQQPYPQPQPF		13	259	24	A0A1P8DSI8; A0A1P8DT82; M4WFC9; I3RXV8; Q41533; A0A1P8DT06; A0A023WGB8; A0A0E3URA8; D2X6C9; A0A0K2QJD8; Q0GK30; A0A1P8DSE3; A0A1P8DSG6	2	2222.1	19	NF	H	H	NF	H	H	NF	1.6	2	1111.55	-0.59	25.7783
TRUE	Master Protein	A2IBK1	LMW-m2 glutenin subunit OS=Triticum zhukovskyi OX=77602 GN=LMW-m2 PE=4 SV=1	85.1429	39	1269	1	1	350	39.8	8.32	H	H	H	H	H	H	H	1152.25	39
	Confidence	Sequence	Modifications	# Protein Groups	# Proteins	# PSMs	Master Protein Accessions	# Missed Cleavages	Theo. MH+ [Da]	Sequence Length	Found in Sample Group: 1_AG38Duetto	Found in Sample Group: 5_AG167PI	Found in Sample Group: S_Semola	Found in Sample Group: 4_AG77Neolatino	Found in Sample Group: 3_AG69Lloyd	Found in Sample Group: SI_SemolaIntegrale	Found in Sample Group: 2_AG33Colosseo	XCorr Sequest HT	Charge Sequest HT	m/z [Da] Sequest HT	DeltaM [ppm] Sequest HT	RT [min] Sequest HT
	H	CSVNVPVY	1xCarbamidomethyl [C1]	22	93	3	A2IBK1; Q8W3X5; A0A2P1BXV0; Q6J6V0; A0A0U3ANN8; A0A346R8U1; R4JAP5; A9YWM3; D3U329; F8SGM9; A0A2R4Q9T1; R4JB62; D5FPF3; A0A0U3AIG6; C8CCM8; A2IBJ9; D5FPE9; A8CA05; F8SGM7; D5FPF4; Q68VI0; F8SGN9	3	937.445	8	NF	NF	H	NF	H	NF	H	1.18	1	937.444	-0.8	16.9848
	H	DAIRAIIY		25	101	217	A2IBK1; Q8W3X5; A0A2P1BXV0; Q6J6V0; A0A0U3ANN8; R4JAP5; A9YWM3; D5FPF1; D3U329; V9P785; F8SGM9; A0A2R4Q9T1; R4JB62; D5FPF3; A0A0U3AIG6; Q41552; C8CCM8; A2IBJ9; D5FPE9; A8CA05; F8SGM7; D5FPF4; Q68VI0; F8SGN9; B8Y0L6	0	934.536	8	H	H	H	H	H	H	H	2.32	2	467.772	0.44	19.2101
	H	GQWPQQQQVPQGTL		22	88	15	A2IBK1; Q8W3X5; A0A2P1BXV0; Q6J6V0; A0A0U3ANN8; R4JAP5; A9YWM3; D3U329; V9P785; F8SGM9; A0A2R4Q9T1; R4JB62; D5FPF3; A0A0U3AIG6; C8CCM8; A2IBJ9; A8CA05; F8SGM7; D5FPF4; Q68VI0; F8SGN9; B8Y0L6	1	1594.8	14	H	H	H	H	H	H	H	2.49	2	797.901	-1.57	19.641
	H	GQWPQQQQVPQGTLLQPHQIAQL		20	86	3	A2IBK1; Q8W3X5; A0A2P1BXV0; Q6J6V0; A0A0U3ANN8; R4JAP5; A9YWM3; D3U329; V9P785; F8SGM9; A0A2R4Q9T1; R4JB62; D5FPF3; A0A0U3AIG6; C8CCM8; A2IBJ9; A8CA05; D5FPF4; Q68VI0; F8SGN9	3	2623.37	23	NF	NF	NF	H	H	NF	NF	1.39	3	875.128	-1.24	25.9172
	H	GVGTRVGAY		18	72	20	A2IBK1; Q8W3X5; A0A2P1BXV0; A0A0U3ANN8; R4JAP5; A9YWM3; D5FPF1; D3U329; F8SGM9; R4JB62; D5FPF3; C8CCM8; A2IBJ9; A8CA05; F8SGM7; D5FPF4; F8SGN9; B8Y0L6	0	879.468	9	H	H	H	H	H	H	H	1.63	2	440.237	-1.23	3.9266
	H	LQQPPFSQHQQPVLPQQQIPSVQPSIL		3	21	16	A2IBK1; V9P785; A2IBJ9	3	3062.64	27	NF	NF	H	H	H	NF	H	2.52	3	1021.55	0.66	27.7387
	H	LQQQCSPVAMPQSL	1xCarbamidomethyl [C5]	33	198	8	R9XVA5; A2IBK1; Q8W3X5; A0A2P1BXV0; D5FPE3; C8CCM7; Q6J6V0; A2IBV5; A9YWM3; D5FPF1; D3U329; V9P785; F8SGM9; Q8W3W8; R4JDM1; A0A2R4Q9T1; K0I5W1; R4JB62; D5FPF3; A0A0U3AGE0; Q41552; Q8W3X4; C8CCM8; A2IBJ9; A8CA05; F8SGM7; D5FPF4; Q68VI0; F8SGN9; Q8W3X0; B2Y2R6; B8Y0L6; A0A0U3ATU4	1	1586.77	14	NF	NF	H	H	H	H	H	1.9	2	793.886	-1	21.583
	H	NQPQQQQPQQSVQGVSQPQQQQKQL		20	82	21	A2IBK1; Q8W3X5; A0A2P1BXV0; Q6J6V0; A0A0U3ANN8; R4JAP5; A9YWM3; D5FPF1; D3U329; V9P785; F8SGM9; A0A2R4Q9T1; R4JB62; Q41552; C8CCM8; A2IBJ9; A8CA05; F8SGM7; F8SGN9; B8Y0L6	0	2887.44	25	H	H	H	H	H	H	H	2.26	3	963.15	-1.6	7.5568
	H	QQPPFSQHQQPVLPQQQIPSVQPSIL	1xGln->pyro-Glu [N-Term]	3	21	35	A2IBK1; V9P785; A2IBJ9	2	2932.53	26	NF	NF	H	H	H	H	H	2.86	2	1466.77	1.32	32.439
	H	QQPPFSQHQQPVLPQQQIPSVQPSIL	1xGln->pyro-Glu [N-Term]; 1xDeamidated [Q]	3	21	12	A2IBK1; V9P785; A2IBJ9	2	2933.52	26	NF	NF	H	H	H	H	NF	1.76	2	1467.27	6.27	32.1792
	H	QQPPFSQHQQPVLPQQQIPSVQPSIL		3	21	155	A2IBK1; V9P785; A2IBJ9	2	2949.56	26	NF	NF	H	H	H	H	H	5.47	3	983.857	-1.07	26.6665
	H	QQPQQQQL		26	108	96	G0YLZ2; A2IBK1; Q8W3X5; A0A2P1BXV0; A0A0U3ANN8; Q5XXZ7; R4JAP5; A9YWM3; D5FPF1; V9P785; F8SGM9; R4JB62; D5FPF3; A0A0U3AGE0; A0A0U3AIG6; C8CCM8; A2IBJ9; D5FPE9; A8CA05; F8SGM7; D4HNA5; D5FPF4; F5A7G6; Q68VI0; F8SGN9; B8Y0L6	0	997.506	8	H	H	H	H	H	H	H	2.65	1	997.505	-0.95	3.8091
	H	QQPQQQQL	1xGln->pyro-Glu [N-Term]	25	103	5	G0YLZ2; A2IBK1; Q8W3X5; A0A2P1BXV0; A0A0U3ANN8; Q5XXZ7; R4JAP5; A9YWM3; D5FPF1; V9P785; F8SGM9; R4JB62; D5FPF3; A0A0U3AIG6; C8CCM8; A2IBJ9; D5FPE9; A8CA05; F8SGM7; D4HNA5; D5FPF4; F5A7G6; Q68VI0; F8SGN9; B8Y0L6	0	980.48	8	NF	NF	NF	NF	H	H	H	1.55	2	490.743	-0.23	11.7416
	H	QQQPIPL		17	76	166	A2IBK1; Q8W3X5; A0A2P1BXV0; A0A0U3ANN8; A9YWM3; V9P785; F8SGM9; R4JB62; C8CCM8; A2IBJ9; A8CA05; F8SGM7; A7X9Y0; D5FPF4; Q68VI0; F8SGN9; B8Y0L6	0	823.467	7	H	H	H	H	H	H	H	1.76	1	823.466	-0.9	16.4551
	H	QQQPLPL	1xGln->pyro-Glu [N-Term]	17	76	42	A2IBK1; Q8W3X5; A0A2P1BXV0; A0A0U3ANN8; A9YWM3; V9P785; F8SGM9; R4JB62; C8CCM8; A2IBJ9; A8CA05; F8SGM7; A7X9Y0; D5FPF4; Q68VI0; F8SGN9; B8Y0L6	1	806.441	7	H	NF	H	H	H	H	H	1.05	1	806.44	-0.23	27.8002
	H	QQQPLPLQQILW		17	74	22	A2IBK1; Q8W3X5; A0A2P1BXV0; A0A0U3ANN8; A9YWM3; V9P785; F8SGM9; R4JB62; C8CCM8; A2IBJ9; A8CA05; F8SGM7; A7X9Y0; D5FPF4; Q68VI0; F8SGN9; B8Y0L6	3	1491.83	12	NF	NF	H	H	H	H	H	2.41	2	746.419	-0.73	38.6784
	H	RTLPTMCSVNVPVY	1xCarbamidomethyl [C7]	16	71	34	A2IBK1; Q8W3X5; A0A2P1BXV0; A0A0U3ANN8; R4JAP5; A9YWM3; F8SGM9; R4JB62; D5FPF3; C8CCM8; A2IBJ9; A8CA05; F8SGM7; D5FPF4; Q68VI0; F8SGN9	1	1636.82	14	H	H	H	H	H	H	H	2.98	2	818.912	-0.76	21.4662
	H	RTLPTMCSVNVPVY	1xOxidation [M6]; 1xCarbamidomethyl [C7]	16	71	9	A2IBK1; Q8W3X5; A0A2P1BXV0; A0A0U3ANN8; R4JAP5; A9YWM3; F8SGM9; R4JB62; D5FPF3; C8CCM8; A2IBJ9; A8CA05; F8SGM7; D5FPF4; Q68VI0; F8SGN9	1	1652.81	14	H	NF	NF	H	H	NF	H	2.36	2	826.909	-1.08	16.5473
	H	SIVLQEQQHGQGL		13	73	76	A2IBK1; Q8W3X5; A0A2P1BXV0; A0A0U3ANN8; A9YWM3; V9P785; F8SGM9; R4JB62; C8CCM8; A2IBJ9; A8CA05; F8SGM7; D5FPF4	1	1436.75	13	H	H	H	H	H	H	H	3.2	2	718.878	0.24	12.2673
	H	SIVLQEQQHGQGLNQPQQQQPQQSVQGVSQPQQQQKQL	1xDeamidated [Q]	12	60	7	A2IBK1; Q8W3X5; A0A2P1BXV0; A0A0U3ANN8; A9YWM3; V9P785; F8SGM9; R4JB62; C8CCM8; A2IBJ9; A8CA05; F8SGM7	2	4306.16	38	NF	NF	NF	NF	NF	H	NF	1.02	3	1436.06	-0.21	13.363
	H	SQHQQPVLPQQQIPSVQPSIL		12	68	55	A2IBK1; Q8W3X5; A0A2P1BXV0; V9P785; F8SGM9; R4JB62; A2IBJ9; A8CA05; F8SGM7; D5FPF4; F8SGN9; B8Y0L6	1	2352.27	21	H	H	H	H	H	H	H	4.59	2	1176.64	-0.05	23.8399
	H	SQQQQPPFSQQQPPFSQQQQPVL	3xDeamidated [Q]	9	80	10	A2IBK1; Q8W3X5; A0A2P1BXV0; C8CCM7; A0A0U3ANN8; R4JDM1; K0I5W1; D5FPF3; B8Y0L6	3	2683.26	23	NF	H	NF	NF	NF	NF	NF	1.09	3	895.089	-4.45	17.1276
	H	SQQQQPVIPQQPPF		51	229	62	D0F0C5; N1R0S5; C6K8R4; D3UAL8; D0ES12; G0YLZ2; R9XVA5; A2IBK1; Q8W3X5; A0A2P1BXV0; B5TWK5; I3QPG3; Q84U12; D5FPE3; B5A810; C8CCM7; R4JAP5; D5FPF1; Q6J6U9; A0A2R4Q9T7; V9P6P6; C6K8R8; V9P769; Q8W3W8; B5A816; R9XUW0; R4JB62; D5FPF3; A0A0U3AGE0; B5A813; F1C940; Q8W3X4; A2IBJ9; R9YSZ0; F8SGQ2; A0A2R4Q9U1; Q9XGF0; A7XDG0; Q84U16; A7X9Y0; D5FPF4; A0A2R4Q9S5; F5A7G6; F8SGP8; Q68VI0; Q0Q2J1; Q8W3X0; X2J…	0	1621.83	14	H	H	H	H	H	H	H	2.91	2	811.419	-0.97	23.216
	H	SQQQQQFPQQQQPL		9	56	3	A2IBK1; A0A2P1BXV0; A0A0U3ANN8; V9P785; F8SGM9; A2IBJ9; A8CA05; F8SGM7; F8SGN9	1	1712.84	14	NF	NF	NF	H	H	NF	NF	1.65	2	856.92	-1.03	13.6968
	H	YQQQQPIQQQPQPF		13	65	7	A2IBK1; Q8W3X5; A0A2P1BXV0; V9P785; F8SGM9; R4JB62; A2IBJ9; A8CA05; F8SGM7; A7X9Y0; Q68VI0; F8SGN9; B8Y0L6	1	1757.86	14	NF	NF	H	H	H	NF	H	1.72	2	879.434	-0.44	16.7584
	H	YQQQQPIQQQPQPFPQQPPCSQQQQPPLSQQQQPPF	1xDeamidated [Q]; 1xCarbamidomethyl [C20]	9	48	4	A2IBK1; Q8W3X5; A0A2P1BXV0; V9P785; F8SGM9; A8CA05; F8SGM7; F8SGN9; B8Y0L6	3	4313.05	36	H	NF	NF	NF	NF	NF	NF	1.09	3	1438.36	6.67	24.9959
	H	YQQQQPIQQQPQPFPQQPPCSQQQQPPLSQQQQPPF	2xDeamidated [Q]; 1xCarbamidomethyl [C20]	9	48	3	A2IBK1; Q8W3X5; A0A2P1BXV0; V9P785; F8SGM9; A8CA05; F8SGM7; F8SGN9; B8Y0L6	3	4314.03	36	NF	NF	NF	NF	H	H	NF	1.15	3	1438.7	9.47	25.1866
TRUE	Master Protein	A0A0E3UQX9	Alpha-gliadin (Fragment) OS=Triticum spelta OX=58933 PE=4 SV=1	57.5972	23	917	1	1	283	32.6	8.69	H	H	H	H	H	H	H	1137.03	23
	Confidence	Sequence	Modifications	# Protein Groups	# Proteins	# PSMs	Master Protein Accessions	# Missed Cleavages	Theo. MH+ [Da]	Sequence Length	Found in Sample Group: 1_AG38Duetto	Found in Sample Group: 5_AG167PI	Found in Sample Group: S_Semola	Found in Sample Group: 4_AG77Neolatino	Found in Sample Group: 3_AG69Lloyd	Found in Sample Group: SI_SemolaIntegrale	Found in Sample Group: 2_AG33Colosseo	XCorr Sequest HT	Charge Sequest HT	m/z [Da] Sequest HT	DeltaM [ppm] Sequest HT	RT [min] Sequest HT
	H	ALQTLPAMCNVY	1xCarbamidomethyl [C9]	25	250	84	A0A0E3Z552; G9I1R6; G9I1R5; A0A1P8DT82; A0A1P8DTB0; A0A0E3URC4; G9I1S5; A0A1P8DSN6; A8VZI4; H8Y0G8; D2X6C9; M8AS61; A9YRP1; Q0GK30; A0A1P8DSE3; M4WER7; A9YRP3; I0IT53; A0A0E3UQX9; I0IT57; X2KWD8; A0A1P8DT27; I0IT59; A9Z0K0; A0A0E3Z7K2	2	1380.67	12	H	H	H	H	H	H	H	2.23	2	690.836	-0.04	26.2605
	H	CCQHLW	2xCarbamidomethyl [C1; C2]	18	250	86	A0A1P8DSI8; Q2QL61; A0A0E3UQX3; A0A1P8DT82; M4WFC9; M4WEQ6; H9NAK8; A0A1P8DSH1; A0A1P8DT06; A0A0E3Z5X0; D2X6C9; Q0GK30; A0A1P8DSE3; A0A1P8DSE0; A0A0E3UQX9; A0A1P8DSG6; A0A1P8DT27; A0A0E3Z7K2	1	903.36	6	H	H	H	H	H	H	H	2.2	2	452.184	0.17	9.5908
	H	CTIAPF	1xCarbamidomethyl [C1]	18	253	140	A0A1P8DSI8; A0A0E3UQX3; M4WFC9; Q41533; M4WEQ6; A0A1P8DSH1; H8Y0D1; A0A1P8DSY8; H8Y0E6; Q0GK30; A0A1P8DSE0; M4WER7; A0A0E3UQX9; A0A1P8DSG6; A0A1P8DT27; H8Y0E7; G9I1R9; A0A0E3Z7K2	0	708.339	6	H	H	H	H	H	H	H	1.84	1	708.338	-0.2	19.4467
	H	GIFGTN		44	372	134	A0A2R2Y432; A0A1P8DSI8; A0A0E3Z552; G9I1R6; U3PUB1; G9I1R5; I3RXY0; A0A1P8DT82; R9XST5; M4WH49; I3RXV8; A0A1P8DTB0; A0A0E3URC4; G9I1S5; A0A1P8DSN6; I3RXY2; A0A1P8DSH1; A0A0E3Z5J4; A7LHC5; A0A291I1T3; M4WYH4; E0Z2G0; H8Y0D1; A5JSA3; A0A1P8DSY8; F5A7H0; H8Y0E6; D2X6C9; M8AS61; A9YRP1; U3PXH9; Q0GK30; A0A1P8DSE3; M4WER7; R9XUL8; A7LHB8; A0A0E3UQX9; X2L2G3; X2KWD8; I3RXW9; E0Z2G8; A0A1P8DT27; H8Y0E7;…	1	608.304	6	H	H	H	H	H	H	H	1.65	1	608.304	0.47	15.7513
	H	IPPYCTIAPF	1xCarbamidomethyl [C5]	18	250	47	A0A1P8DSI8; A0A0E3UQX3; M4WFC9; Q41533; M4WEQ6; A0A1P8DSH1; H8Y0D1; A0A1P8DSY8; H8Y0E6; Q0GK30; M4WER7; A0A0E3UQX9; A0A1P8DSG6; A0A1P8DT27; H8Y0E7; G9I1R9; R9XSU5; A0A0E3Z7K2	1	1178.59	10	H	H	H	H	H	H	H	2.13	1	1178.59	-0.32	30.4528
	H	LQLQPFPQPQLPY		20	250	73	A0A1P8DSI8; I3RXY0; R9XST5; I3RXV8; G9I1S5; I3RXY2; Q2QL52; A0A291I1T3; M4WYH4; E0Z2G0; Q2QL42; D2X6C9; U3PXH9; Q0GK30; A0A1P8DSE3; R9XUL8; A0A1P8DT67; A0A0E3UQX9; E0Z2G8; A0A0E3Z7K2	4	1568.85	13	H	H	H	H	H	H	H	3.49	2	784.927	-0.42	33.5583
	H	QQPQQQYPL		18	185	71	Q2QL61; A0A142L072; M4WFC9; H8Y0F3; A0A0N7A5G3; I6U6J1; A0A0E3URA8; E5FF30; A0A1P8DSE3; M4WER7; A0A0E3Z5V1; E5FF35; A0A0N7A522; A0A0E3UQX9; A0A142L083; E5FF31; A0A1P8DSG6; A0A0E3Z7K2	1	1129.56	9	H	H	H	H	H	H	H	2.49	2	565.285	-0.87	13.0335
	H	QQPQQQYPLGQGSF		15	138	17	Q2QL61; A0A142L072; M4WFC9; H8Y0F3; I6U6J1; A0A0E3URA8; E5FF30; A0A1P8DSE3; M4WER7; A0A0E3Z5V1; A0A0E3UQX9; A0A142L083; E5FF31; A0A1P8DSG6; A0A0E3Z7K2	2	1605.77	14	H	H	H	H	H	H	H	3.21	2	803.385	-2.08	20.6857
	H	QTLPAMCNVY	1xCarbamidomethyl [C7]	27	251	5	A0A0E3Z552; G9I1R6; G9I1R5; A0A1P8DT82; A0A1P8DTB0; A0A0E3URC4; G9I1S5; A0A1P8DSN6; A0A1P8DSH1; A8VZI4; A0A1P8DSY8; H8Y0G8; D2X6C9; M8AS61; A9YRP1; Q0GK30; A0A1P8DSE3; M4WER7; A9YRP3; I0IT53; A0A0E3UQX9; I0IT57; X2KWD8; A0A1P8DT27; I0IT59; A9Z0K0; A0A0E3Z7K2	1	1196.54	10	NF	H	H	H	NF	H	NF	1.45	2	598.775	-1	21.3197
	H	RPQQPYPQPQPQY		23	250	136	A0A1P8DSI8; U3PUB1; I3RXY0; A0A1P8DT82; R9XST5; I3RXV8; Q2QL52; A7LHC5; A0A291I1T3; M4WYH4; E0Z2G0; Q2QL42; A5JSA3; D2X6C9; U3PXH9; Q0GK30; A0A1P8DSE3; R9XUL8; A0A0E3UQX9; I3RXX8; I3RXW9; A0A1P8DT27; A0A0E3Z7K2	1	1626.8	13	H	H	H	H	H	H	H	3.18	2	813.904	-1.36	8.8088
	H	SQPQPF		16	253	23	A0A1P8DSI8; Q2QL61; A0A1P8DT82; M4WFC9; Q41533; M4WEQ6; H9NAK8; A0A1P8DT06; A0A023WGB8; A0A0E3Z5X0; D2X6C9; Q0GK30; A0A1P8DSE3; A0A0E3UQX9; A0A1P8DT27; A0A0E3Z7K2	0	703.341	6	H	H	H	H	H	H	H	1.67	1	703.341	-0.21	9.3433
TRUE	Master Protein	A2IBV5	Glutenin subunit OS=Triticum aestivum OX=4565 GN=LMW-s1 PE=4 SV=1	71.0674	36	1898	3	1	356	40.4	8.53	H	H	H	H	H	H	H	1122.26	36
	Confidence	Sequence	Modifications	# Protein Groups	# Proteins	# PSMs	Master Protein Accessions	# Missed Cleavages	Theo. MH+ [Da]	Sequence Length	Found in Sample Group: 1_AG38Duetto	Found in Sample Group: 5_AG167PI	Found in Sample Group: S_Semola	Found in Sample Group: 4_AG77Neolatino	Found in Sample Group: 3_AG69Lloyd	Found in Sample Group: SI_SemolaIntegrale	Found in Sample Group: 2_AG33Colosseo	XCorr Sequest HT	Charge Sequest HT	m/z [Da] Sequest HT	DeltaM [ppm] Sequest HT	RT [min] Sequest HT
	H	EAIRAIVY		16	69	218	D3UAL8; B2LWZ2; B5A810; A2IBV5; Q6J6U9; Q8W3W8; Q8W3X4; Q9XGF0; A7XDG0; F6M7E1; B2LWZ6; A0A346R8T9; A0A346R8T6; Q0Q2J1; Q8W3X0; B2Y2R6	0	934.536	8	H	H	H	H	H	H	H	2.52	2	467.771	-0.08	13.5366
	H	GQCVSQPQQQSQQQL	1xCarbamidomethyl [C3]	29	250	20	Q5PU42; D0F0C5; K7WV80; A0A3G3C4J5; Q1ZZT4; A0A165R8I1; C8CCM2; D0ES12; R9XVA5; H6VLQ1; C8CCM7; R4JFH5; A2IBV5; Q0PW08; Q8W3W8; R4JDM1; Q5MFK8; K0I5W1; A0A0U3AGE0; F1C940; H6VLQ3; Q9XGF0; Q3YB17; Q3YB18; Q5MFH4; T1LG74; A0A346R8T7; A0A2R4Q9V4; Q8W3X0	0	1743.81	15	H	NF	H	H	H	H	H	2.8	2	872.408	0.44	5.8298
	H	GVGTGVGGY		5	36	167	A2IBV5; Q8W3X4; A0A068F8R5; Q8W3X0; B2Y2R6	0	766.373	9	H	H	H	H	H	H	H	3.01	1	766.372	-0.73	9.7258
	H	LQQQCSPVAMPQSL	1xCarbamidomethyl [C5]	33	198	8	R9XVA5; A2IBK1; Q8W3X5; A0A2P1BXV0; D5FPE3; C8CCM7; Q6J6V0; A2IBV5; A9YWM3; D5FPF1; D3U329; V9P785; F8SGM9; Q8W3W8; R4JDM1; A0A2R4Q9T1; K0I5W1; R4JB62; D5FPF3; A0A0U3AGE0; Q41552; Q8W3X4; C8CCM8; A2IBJ9; A8CA05; F8SGM7; D5FPF4; Q68VI0; F8SGN9; Q8W3X0; B2Y2R6; B8Y0L6; A0A0U3ATU4	1	1586.77	14	NF	NF	H	H	H	H	H	1.9	2	793.886	-1	21.583
	H	PPFSQQQQPPFSQQQQPVLPQQPSFSQQQL		8	32	15	D3UAL8; R9XVA5; D5FPE3; A2IBV5; Q8W3X4; Q9XGF0; Q8W3X0; B2Y2R6	4	3477.72	30	H	H	NF	H	H	H	H	1.66	3	1159.91	0.07	28.8574
	H	PPFSQQQQPPFSQQQQPVLPQQPSFSQQQLPPF	2xDeamidated [Q]	8	32	14	D3UAL8; R9XVA5; D5FPE3; A2IBV5; Q8W3X4; Q9XGF0; Q8W3X0; B2Y2R6	5	3820.86	33	H	NF	NF	H	H	NF	NF	1.91	3	1274.3	2.62	28.2599
	H	PQQPPFSQQQLPPF		5	25	5	R9XVA5; A2IBV5; Q8W3X4; Q0Q2J1; B2Y2R6	2	1638.83	14	H	NF	NF	H	H	H	NF	1.03	2	819.917	-0.02	25.2491
	H	QMENSHIPGLERPSQQQPLPPQQTL	1xGln->pyro-Glu [N-Term]; 1xDeamidated [N/Q]	10	46	29	R9XVA5; D5FPE3; A2IBV5; Q8W3W8; K0I5W1; Q8W3X4; A7XDG0; Q0Q2J1; Q8W3X0; B2Y2R6	4	2837.39	25	H	NF	H	NF	H	H	NF	1.95	3	946.469	0.94	24.0259
	H	QQQIPF	1xGln->pyro-Glu [N-Term]	20	115	122	A0A1D6PVA1; D3UAL8; A0A1D6PVM1; Q670S2; Q84U12; D5FPE3; A2IBV5; D5FPF1; A0A024A3B7; A0A3L6F0A4; Q8W3W8; Q5XXZ9; Q8W3X4; Q9XGF0; A7XDG0; B6SII5; Q0Q2J1; Q8W3X0; B2Y2R6; A0A0U3ATU4	0	743.372	6	H	H	H	H	H	H	H	1.23	1	743.372	-1	29.9125
	H	QQQLPF		20	115	466	A0A1D6PVA1; D3UAL8; A0A1D6PVM1; Q670S2; Q84U12; D5FPE3; A2IBV5; D5FPF1; A0A024A3B7; A0A3L6F0A4; Q8W3W8; Q5XXZ9; Q8W3X4; Q9XGF0; A7XDG0; B6SII5; Q0Q2J1; Q8W3X0; B2Y2R6; A0A0U3ATU4	1	760.399	6	H	H	H	H	H	H	H	1.53	1	760.399	0.15	17.7289
	H	RTTTRVPF		10	44	59	D3UAL8; D5FPE3; A2IBV5; Q8W3W8; Q8W3X4; Q9XGF0; A7XDG0; Q0Q2J1; Q8W3X0; B2Y2R6	0	977.553	8	H	H	H	H	H	H	H	1.53	2	489.28	-0.34	3.8425
	H	SIILQEQQQVQGSIQTQQQQPQQL	1xDeamidated [Q]	11	56	20	D5FPE3; A2IBV5; Q8W3W8; A0A0U3AGE0; Q8W3X4; Q9XGF0; A7XDG0; Q0Q2J1; Q8W3X0; B2Y2R6; A0A0U3ATU4	1	2779.42	24	H	NF	H	NF	NF	NF	NF	1.27	3	927.151	6.02	23.8626
	H	SIILQEQQQVQGSIQTQQQQPQQL		11	56	84	D5FPE3; A2IBV5; Q8W3W8; A0A0U3AGE0; Q8W3X4; Q9XGF0; A7XDG0; Q0Q2J1; Q8W3X0; B2Y2R6; A0A0U3ATU4	1	2778.44	24	H	H	H	H	H	H	H	5.08	2	1389.72	0.61	24.0527
	H	SQQQLPPF		14	97	16	D3UAL8; R9XVA5; D5FPE3; A2IBV5; R4JDM1; K0I5W1; A0A0U3AGE0; Q8W3X4; Q9XGF0; A7XDG0; Q0Q2J1; Q8W3X0; B2Y2R6; A0A0U3ATU4	1	944.484	8	H	NF	H	H	H	H	H	1.3	1	944.482	-1.97	19.3503
	H	SQQQLPPFSQQLPPF		10	36	54	D3UAL8; R9XVA5; D5FPE3; A2IBV5; Q8W3X4; Q9XGF0; A7XDG0; Q0Q2J1; Q8W3X0; B2Y2R6	3	1741.89	15	H	NF	H	H	H	H	H	1.95	2	871.45	1.33	32.9225
	H	SQQQLPPFSQQQQPPF		8	33	34	D3UAL8; R9XVA5; D5FPE3; A2IBV5; Q8W3X4; Q9XGF0; Q8W3X0; B2Y2R6	2	1884.92	16	H	H	H	H	H	H	H	1.97	2	942.964	-1.17	25.5109
	H	SQQQLPPFSQQQQPPFSQQQQPVLPQQPSF	1xDeamidated [Q]	8	32	4	D3UAL8; R9XVA5; D5FPE3; A2IBV5; Q8W3X4; Q9XGF0; Q8W3X0; B2Y2R6	4	3478.7	30	NF	NF	NF	NF	NF	H	NF	1.58	3	1160.25	5.33	30.7475
	H	SQQQLPPFSQQQQPPFSQQQQPVLPQQPSF		8	32	25	D3UAL8; R9XVA5; D5FPE3; A2IBV5; Q8W3X4; Q9XGF0; Q8W3X0; B2Y2R6	4	3477.72	30	H	NF	H	H	H	NF	H	2.49	3	1159.91	-0.56	30.8261
	H	SQQQQPPFSQQQQPPF		49	266	54	A0A165R8I1; D3UAL8; B2LWZ2; R9XVA5; A0A0A0R2J7; G9AYK6; X2J8E3; F1C945; R9XV91; Q5MFH0; D5FPE3; B5A810; Q38L54; R4JFH5; A2IBV5; R9XUD0; P93794; A0A0A0R2I8; A0A1U9XLA9; C6KI71; Q8W3W8; Q84NE4; F1C943; A0A1G4P206; Q2PQJ6; X2JAE7; D0ES19; A0A024A269; Q8W3X4; D0ES20; D0ES16; R4JB44; Q9XGF0; A7XDG0; B2LWZ6; Q84U16; Q6QGW0; A0A068F8R5; T1LG74; A0A346R8T6; A0A089VKK4; A0A0A0QYP7; K7R468; B8XU51; V9P6N2;…	1	1899.9	16	H	H	H	H	H	H	H	4	2	950.452	-0.53	20.9553
	H	SQQQQPPFSQQQQPVLPQQPSF		10	38	48	D3UAL8; R9XVA5; D5FPE3; A2IBV5; Q8W3X4; Q9XGF0; A7XDG0; Q0Q2J1; Q8W3X0; B2Y2R6	2	2552.25	22	H	H	H	H	H	H	H	3.55	2	1276.63	0.92	25.5605
	H	SQQQQPPFSQQQQPVLPQQPSFSQQQLPPF		10	37	15	D3UAL8; R9XVA5; D5FPE3; A2IBV5; Q8W3X4; Q9XGF0; A7XDG0; Q0Q2J1; Q8W3X0; B2Y2R6	4	3477.72	30	H	NF	H	H	H	NF	H	1.85	3	1159.91	0.7	32.445
	H	SQQQQPVIPQQPSFSQQQLPPF		11	91	8	D3UAL8; R9XVA5; D5FPE3; A2IBV5; R4JDM1; Q8W3X4; Q9XGF0; A7XDG0; Q0Q2J1; Q8W3X0; B2Y2R6	2	2537.28	22	H	NF	NF	H	H	NF	H	1.27	2	1269.14	-0.84	30.7325
	H	SQQQQPVLL		10	31	53	D3UAL8; B8Y444; A2IBV5; Q8W3W8; Q8W3X4; Q9XGF0; Q84U16; B9VSH9; Q8W3X0; B2Y2R6	1	1040.57	9	H	H	H	H	H	H	H	2.11	2	520.791	0.4	17.0267
	H	SQQQQPVLPQQPSF		12	97	58	D3UAL8; R9XVA5; D5FPE3; C8CCM7; A2IBV5; R4JDM1; Q8W3X4; Q9XGF0; A7XDG0; Q0Q2J1; Q8W3X0; B2Y2R6	1	1611.81	14	H	H	H	H	H	H	H	3.4	2	806.409	-0.6	20.9087
	H	SQQQQPVLPQQPSFSQQQLPPFSQQQQPPF		7	32	5	D3UAL8; R9XVA5; A2IBV5; Q8W3X4; Q9XGF0; Q8W3X0; B2Y2R6	4	3477.72	30	H	NF	NF	H	H	NF	H	1.59	3	1159.91	0.07	31.9154
	H	VHPSIL		36	208	822	I3XHQ0; D3UAL8; H9XGZ9; R9XVA5; A2IBJ7; D5FPE3; D0F0C4; C8CCM7; P06471; A2IBV5; Q0PIV6; A0A287EIZ3; Q8W3W8; R4JDM1; K0I5W1; Q40026; A0A0U3AGE0; A0A0U3AIG6; Q8W3X4; D5FPE9; Q9XGF0; A0A287EFG2; A7XDG0; I6TMW4; I6SJ22; A0A0U2JFU1; A8IEC6; A0A287EFF7; A0A0K2GRQ1; I6SW30; Q0Q2J1; Q8W3X0; A0A287EIW5; B2Y2R6; A8IEB4; A0A0U3ATU4	0	665.398	6	H	H	H	H	H	H	H	1.62	1	665.397	-0.94	7.2207
	H	YRTTTRVPF		10	44	134	D3UAL8; D5FPE3; A2IBV5; Q8W3W8; Q8W3X4; Q9XGF0; A7XDG0; Q0Q2J1; Q8W3X0; B2Y2R6	2	1140.62	9	H	H	H	H	H	H	H	2.34	3	380.877	-0.39	6.8361
TRUE	Master Protein	A9YWM3	Low-molecular-weight glutenin subunit OS=Aegilops longissima OX=4486 PE=4 SV=1	71.118	39	1452	3	1	322	36.7	8.32	H	H	H	H	H	H	H	1115.63	39
	Confidence	Sequence	Modifications	# Protein Groups	# Proteins	# PSMs	Master Protein Accessions	# Missed Cleavages	Theo. MH+ [Da]	Sequence Length	Found in Sample Group: 1_AG38Duetto	Found in Sample Group: 5_AG167PI	Found in Sample Group: S_Semola	Found in Sample Group: 4_AG77Neolatino	Found in Sample Group: 3_AG69Lloyd	Found in Sample Group: SI_SemolaIntegrale	Found in Sample Group: 2_AG33Colosseo	XCorr Sequest HT	Charge Sequest HT	m/z [Da] Sequest HT	DeltaM [ppm] Sequest HT	RT [min] Sequest HT
	H	ARSQML		49	270	7	D0F0C5; J9QEK9; D0ES12; B2LWZ2; G0YLZ2; G9AYK6; A0A2P1BXV0; B5A810; C8CCM7; Q6J6V0; R4JFH5; A0A346R8U1; R4JAP5; A9YWM3; D3U329; P93794; J9QFV1; C6K8R8; A0A287EIZ3; F5A7G7; B5A816; Q84NE4; A0A2R4Q9T1; A0A346R8U2; F6KHQ0; R4JB62; D0ES19; B5A813; F1C940; A0A0U3AIG6; Q5XXZ9; D5FPE9; Q9XGF0; A8CA05; Q3YB17; B2LWZ6; A0A346R8T9; Q84U16; T1LG74; A0A346R8T7; A0A2R4Q9V4; A0A346R8T6; A0A089VKK4; Q2L990; A0A…	0	705.371	6	H	NF	H	H	H	H	H	1.23	1	705.37	-1.74	3.2777
	H	CSVNVPVY	1xCarbamidomethyl [C1]	22	93	3	A2IBK1; Q8W3X5; A0A2P1BXV0; Q6J6V0; A0A0U3ANN8; A0A346R8U1; R4JAP5; A9YWM3; D3U329; F8SGM9; A0A2R4Q9T1; R4JB62; D5FPF3; A0A0U3AIG6; C8CCM8; A2IBJ9; D5FPE9; A8CA05; F8SGM7; D5FPF4; Q68VI0; F8SGN9	3	937.445	8	NF	NF	H	NF	H	NF	H	1.18	1	937.444	-0.8	16.9848
	H	DAIRAIIY		25	101	217	A2IBK1; Q8W3X5; A0A2P1BXV0; Q6J6V0; A0A0U3ANN8; R4JAP5; A9YWM3; D5FPF1; D3U329; V9P785; F8SGM9; A0A2R4Q9T1; R4JB62; D5FPF3; A0A0U3AIG6; Q41552; C8CCM8; A2IBJ9; D5FPE9; A8CA05; F8SGM7; D5FPF4; Q68VI0; F8SGN9; B8Y0L6	0	934.536	8	H	H	H	H	H	H	H	2.32	2	467.772	0.44	19.2101
	H	GQWPQQQQVPQGTL		22	88	15	A2IBK1; Q8W3X5; A0A2P1BXV0; Q6J6V0; A0A0U3ANN8; R4JAP5; A9YWM3; D3U329; V9P785; F8SGM9; A0A2R4Q9T1; R4JB62; D5FPF3; A0A0U3AIG6; C8CCM8; A2IBJ9; A8CA05; F8SGM7; D5FPF4; Q68VI0; F8SGN9; B8Y0L6	1	1594.8	14	H	H	H	H	H	H	H	2.49	2	797.901	-1.57	19.641
	H	GQWPQQQQVPQGTLLQPHQIAQL		20	86	3	A2IBK1; Q8W3X5; A0A2P1BXV0; Q6J6V0; A0A0U3ANN8; R4JAP5; A9YWM3; D3U329; V9P785; F8SGM9; A0A2R4Q9T1; R4JB62; D5FPF3; A0A0U3AIG6; C8CCM8; A2IBJ9; A8CA05; D5FPF4; Q68VI0; F8SGN9	3	2623.37	23	NF	NF	NF	H	H	NF	NF	1.39	3	875.128	-1.24	25.9172
	H	GVGTRVGAY		18	72	20	A2IBK1; Q8W3X5; A0A2P1BXV0; A0A0U3ANN8; R4JAP5; A9YWM3; D5FPF1; D3U329; F8SGM9; R4JB62; D5FPF3; C8CCM8; A2IBJ9; A8CA05; F8SGM7; D5FPF4; F8SGN9; B8Y0L6	0	879.468	9	H	H	H	H	H	H	H	1.63	2	440.237	-1.23	3.9266
	H	LPQQPPFSQQQPPF		11	66	12	Q8W3X5; A0A2P1BXV0; A0A0U3ANN8; A9YWM3; V9P785; F8SGM9; R4JB62; A0A0U3AIG6; F8SGM7; D5FPF4; B8Y0L6	2	1638.83	14	NF	NF	H	H	H	H	H	2.28	2	819.917	-0.39	25.3965
	H	LQPHQLAQL		53	256	324	D0F0C5; K7WV80; A9YRN9; C6K8R4; A0A287EFH8; D0ES12; B2LWZ2; G0YLZ2; G9AYK6; A0A2P1BXV0; Q670S2; B5A810; C8CCM7; Q6J6V0; R4JAP5; A9YWM3; D3U329; P93794; J9QFV1; C6K8R8; A0A287EIZ3; F5A7G7; B5A816; Q84NE4; A0A2R4Q9T1; A0A346R8U2; F6KHQ0; Q40026; R4JB62; Q84U17; B5A813; F1C940; A0A0U3AIG6; Q5XXZ9; C8CCM8; D5FPE9; Q9XGF0; A0A287EFG2; A8CA05; Q3YB17; B2LWZ6; A0A346R8T9; Q84U16; A0A346R8T7; A0A2R4Q9V4;…	2	1047.59	9	H	H	H	H	H	H	H	2.76	2	524.301	1.03	10.8766
	H	LQQQCSPVAMPQSL	1xCarbamidomethyl [C5]	33	198	8	R9XVA5; A2IBK1; Q8W3X5; A0A2P1BXV0; D5FPE3; C8CCM7; Q6J6V0; A2IBV5; A9YWM3; D5FPF1; D3U329; V9P785; F8SGM9; Q8W3W8; R4JDM1; A0A2R4Q9T1; K0I5W1; R4JB62; D5FPF3; A0A0U3AGE0; Q41552; Q8W3X4; C8CCM8; A2IBJ9; A8CA05; F8SGM7; D5FPF4; Q68VI0; F8SGN9; Q8W3X0; B2Y2R6; B8Y0L6; A0A0U3ATU4	1	1586.77	14	NF	NF	H	H	H	H	H	1.9	2	793.886	-1	21.583
	H	NQPQQQQPQQSVQGVSQPQQQQKQL		20	82	21	A2IBK1; Q8W3X5; A0A2P1BXV0; Q6J6V0; A0A0U3ANN8; R4JAP5; A9YWM3; D5FPF1; D3U329; V9P785; F8SGM9; A0A2R4Q9T1; R4JB62; Q41552; C8CCM8; A2IBJ9; A8CA05; F8SGM7; F8SGN9; B8Y0L6	0	2887.44	25	H	H	H	H	H	H	H	2.26	3	963.15	-1.6	7.5568
	H	QPHQLAQL		53	256	14	D0F0C5; K7WV80; A9YRN9; C6K8R4; A0A287EFH8; D0ES12; B2LWZ2; G0YLZ2; G9AYK6; A0A2P1BXV0; Q670S2; B5A810; C8CCM7; Q6J6V0; R4JAP5; A9YWM3; D3U329; P93794; J9QFV1; C6K8R8; A0A287EIZ3; F5A7G7; B5A816; Q84NE4; A0A2R4Q9T1; A0A346R8U2; F6KHQ0; Q40026; R4JB62; Q84U17; B5A813; F1C940; A0A0U3AIG6; Q5XXZ9; C8CCM8; D5FPE9; Q9XGF0; A0A287EFG2; A8CA05; Q3YB17; B2LWZ6; A0A346R8T9; Q84U16; A0A346R8T7; A0A2R4Q9V4;…	1	934.51	8	H	NF	H	H	H	H	H	1.53	2	467.759	0.32	5.8896
	H	QQPQQQQL		26	108	96	G0YLZ2; A2IBK1; Q8W3X5; A0A2P1BXV0; A0A0U3ANN8; Q5XXZ7; R4JAP5; A9YWM3; D5FPF1; V9P785; F8SGM9; R4JB62; D5FPF3; A0A0U3AGE0; A0A0U3AIG6; C8CCM8; A2IBJ9; D5FPE9; A8CA05; F8SGM7; D4HNA5; D5FPF4; F5A7G6; Q68VI0; F8SGN9; B8Y0L6	0	997.506	8	H	H	H	H	H	H	H	2.65	1	997.505	-0.95	3.8091
	H	QQPQQQQL	1xGln->pyro-Glu [N-Term]	25	103	5	G0YLZ2; A2IBK1; Q8W3X5; A0A2P1BXV0; A0A0U3ANN8; Q5XXZ7; R4JAP5; A9YWM3; D5FPF1; V9P785; F8SGM9; R4JB62; D5FPF3; A0A0U3AIG6; C8CCM8; A2IBJ9; D5FPE9; A8CA05; F8SGM7; D4HNA5; D5FPF4; F5A7G6; Q68VI0; F8SGN9; B8Y0L6	0	980.48	8	NF	NF	NF	NF	H	H	H	1.55	2	490.743	-0.23	11.7416
	H	QQQPIPL		17	76	166	A2IBK1; Q8W3X5; A0A2P1BXV0; A0A0U3ANN8; A9YWM3; V9P785; F8SGM9; R4JB62; C8CCM8; A2IBJ9; A8CA05; F8SGM7; A7X9Y0; D5FPF4; Q68VI0; F8SGN9; B8Y0L6	0	823.467	7	H	H	H	H	H	H	H	1.76	1	823.466	-0.9	16.4551
	H	QQQPLPL	1xGln->pyro-Glu [N-Term]	17	76	42	A2IBK1; Q8W3X5; A0A2P1BXV0; A0A0U3ANN8; A9YWM3; V9P785; F8SGM9; R4JB62; C8CCM8; A2IBJ9; A8CA05; F8SGM7; A7X9Y0; D5FPF4; Q68VI0; F8SGN9; B8Y0L6	1	806.441	7	H	NF	H	H	H	H	H	1.05	1	806.44	-0.23	27.8002
	H	QQQPLPLQQILW		17	74	22	A2IBK1; Q8W3X5; A0A2P1BXV0; A0A0U3ANN8; A9YWM3; V9P785; F8SGM9; R4JB62; C8CCM8; A2IBJ9; A8CA05; F8SGM7; A7X9Y0; D5FPF4; Q68VI0; F8SGN9; B8Y0L6	3	1491.83	12	NF	NF	H	H	H	H	H	2.41	2	746.419	-0.73	38.6784
	H	RTLPTM		48	251	45	D0F0C5; N1R0S5; K7WV72; J9QEK9; A9YRN9; C6K8R4; G0YLZ2; A0A2P1BXV0; W8E197; W8E194; I3QPG3; W8E1A2; B5A810; C8CCM7; R4JFH5; Q5XXZ7; R4JAP5; A9YWM3; Q6J6U9; A0A2R4Q9T7; J9QFV1; W8E6H6; H8Y0M0; B5A816; W8E2L7; F6KHQ0; R4JB62; W8E6G7; B5A813; K7XED4; D7RFI1; C8CCM8; W8E0F4; A0A2R4Q9U1; A0A2R4Q9S8; W8E5R1; Q9XGF0; A8CA05; Q84U16; Q6B780; A0A346R8T7; A8IEC6; A0A0K2GRQ1; A0A2R4Q9S5; B6UKQ7; X2JC88; A8I…	1	718.392	6	H	H	H	H	H	H	H	1.27	1	718.39	-2.41	5.4248
	H	RTLPTMCSVNVPVY	1xCarbamidomethyl [C7]	16	71	34	A2IBK1; Q8W3X5; A0A2P1BXV0; A0A0U3ANN8; R4JAP5; A9YWM3; F8SGM9; R4JB62; D5FPF3; C8CCM8; A2IBJ9; A8CA05; F8SGM7; D5FPF4; Q68VI0; F8SGN9	1	1636.82	14	H	H	H	H	H	H	H	2.98	2	818.912	-0.76	21.4662
	H	RTLPTMCSVNVPVY	1xOxidation [M6]; 1xCarbamidomethyl [C7]	16	71	9	A2IBK1; Q8W3X5; A0A2P1BXV0; A0A0U3ANN8; R4JAP5; A9YWM3; F8SGM9; R4JB62; D5FPF3; C8CCM8; A2IBJ9; A8CA05; F8SGM7; D5FPF4; Q68VI0; F8SGN9	1	1652.81	14	H	NF	NF	H	H	NF	H	2.36	2	826.909	-1.08	16.5473
	H	SIVLQEQQHGQGL		13	73	76	A2IBK1; Q8W3X5; A0A2P1BXV0; A0A0U3ANN8; A9YWM3; V9P785; F8SGM9; R4JB62; C8CCM8; A2IBJ9; A8CA05; F8SGM7; D5FPF4	1	1436.75	13	H	H	H	H	H	H	H	3.2	2	718.878	0.24	12.2673
	H	SIVLQEQQHGQGLNQPQQQQPQQSVQGVSQPQQQQKQL	1xDeamidated [Q]	12	60	7	A2IBK1; Q8W3X5; A0A2P1BXV0; A0A0U3ANN8; A9YWM3; V9P785; F8SGM9; R4JB62; C8CCM8; A2IBJ9; A8CA05; F8SGM7	2	4306.16	38	NF	NF	NF	NF	NF	H	NF	1.02	3	1436.06	-0.21	13.363
	H	SQQQPPF		36	253	26	K7WV80; A0A3G3C4J5; K7WV72; B8XU59; P93792; Q8W3X5; A0A2P1BXV0; Q8W3V8; C8CCM7; Q6J6V0; R4JAP5; A9YWM3; D2DII6; D3U329; R4JFK3; R4JDM1; Q5MFK8; I3QPH1; A0A2R4Q9T1; A0A346R8U2; R4JB62; F1C940; A0A0U3AIG6; Q41552; K7XED4; D7RFI1; C8CCM8; F8SGM2; R4JD66; D5FPE9; A8CA05; A0A346R8T9; Q6B780; A0A2R4Q9V4; B2LX00; C6KI73	0	831.4	7	H	H	H	H	H	H	H	1.48	1	831.399	-1.26	10.1053
	H	SQQQQPPF		42	254	83	N1R0S5; A0A165R8I1; A9YRN9; B2LWZ2; A0A0A0R2J7; G9AYK6; A0A2P1BXV0; B5A810; C8CCM7; Q6J6V0; R4JFH5; Q5XXZ7; A9YWM3; Q6J6U9; A0A2R4Q9T7; D3U329; P93794; A0A0A0R2I8; B5A816; Q84NE4; A0A2R4Q9T1; Q2PQJ6; D0ES19; B5A813; A0A0U3AIG6; C8CCM8; D5FPE9; A0A2R4Q9U1; Q9XGF0; A8CA05; B2LWZ6; A0A346R8T9; Q84U16; T1LG74; A0A346R8T7; A0A346R8T6; A0A089VKK4; Q2L990; A0A0A0QYP7; A0A2R4Q9S5; B8XU51; X2JC88	0	959.458	8	H	H	H	H	H	H	H	2.1	2	480.233	-0.32	10.2887
	H	SQQQQPPFSQQQQQFPQQQQQPLL	1xDeamidated [Q]	1	3	76	A9YWM3	3	2895.4	24	H	NF	H	H	H	NF	H	1.95	2	1448.21	0.47	22.9111
	H	SQQQQPPFSQQQQQFPQQQQQPLL	2xDeamidated [Q]	1	3	9	A9YWM3	3	2896.39	24	NF	NF	NF	H	NF	NF	NF	1.08	3	966.137	3.88	22.5528
TRUE	Master Protein	D5FPE9	Low-molecular-weight glutenin subunit OS=Aegilops speltoides OX=4573 GN=GluB3-4 PE=4 SV=1	51.5152	29	1417	2	1	363	41.3	7.66	H	H	H	H	H	H	H	1107.34	29
	Confidence	Sequence	Modifications	# Protein Groups	# Proteins	# PSMs	Master Protein Accessions	# Missed Cleavages	Theo. MH+ [Da]	Sequence Length	Found in Sample Group: 1_AG38Duetto	Found in Sample Group: 5_AG167PI	Found in Sample Group: S_Semola	Found in Sample Group: 4_AG77Neolatino	Found in Sample Group: 3_AG69Lloyd	Found in Sample Group: SI_SemolaIntegrale	Found in Sample Group: 2_AG33Colosseo	XCorr Sequest HT	Charge Sequest HT	m/z [Da] Sequest HT	DeltaM [ppm] Sequest HT	RT [min] Sequest HT
	H	ARSQML		49	270	7	D0F0C5; J9QEK9; D0ES12; B2LWZ2; G0YLZ2; G9AYK6; A0A2P1BXV0; B5A810; C8CCM7; Q6J6V0; R4JFH5; A0A346R8U1; R4JAP5; A9YWM3; D3U329; P93794; J9QFV1; C6K8R8; A0A287EIZ3; F5A7G7; B5A816; Q84NE4; A0A2R4Q9T1; A0A346R8U2; F6KHQ0; R4JB62; D0ES19; B5A813; F1C940; A0A0U3AIG6; Q5XXZ9; D5FPE9; Q9XGF0; A8CA05; Q3YB17; B2LWZ6; A0A346R8T9; Q84U16; T1LG74; A0A346R8T7; A0A2R4Q9V4; A0A346R8T6; A0A089VKK4; Q2L990; A0A…	0	705.371	6	H	NF	H	H	H	H	H	1.23	1	705.37	-1.74	3.2777
	H	CSVNVPVY	1xCarbamidomethyl [C1]	22	93	3	A2IBK1; Q8W3X5; A0A2P1BXV0; Q6J6V0; A0A0U3ANN8; A0A346R8U1; R4JAP5; A9YWM3; D3U329; F8SGM9; A0A2R4Q9T1; R4JB62; D5FPF3; A0A0U3AIG6; C8CCM8; A2IBJ9; D5FPE9; A8CA05; F8SGM7; D5FPF4; Q68VI0; F8SGN9	3	937.445	8	NF	NF	H	NF	H	NF	H	1.18	1	937.444	-0.8	16.9848
	H	DAIRAIIY		25	101	217	A2IBK1; Q8W3X5; A0A2P1BXV0; Q6J6V0; A0A0U3ANN8; R4JAP5; A9YWM3; D5FPF1; D3U329; V9P785; F8SGM9; A0A2R4Q9T1; R4JB62; D5FPF3; A0A0U3AIG6; Q41552; C8CCM8; A2IBJ9; D5FPE9; A8CA05; F8SGM7; D5FPF4; Q68VI0; F8SGN9; B8Y0L6	0	934.536	8	H	H	H	H	H	H	H	2.32	2	467.772	0.44	19.2101
	H	LQPHQLAQL		53	256	324	D0F0C5; K7WV80; A9YRN9; C6K8R4; A0A287EFH8; D0ES12; B2LWZ2; G0YLZ2; G9AYK6; A0A2P1BXV0; Q670S2; B5A810; C8CCM7; Q6J6V0; R4JAP5; A9YWM3; D3U329; P93794; J9QFV1; C6K8R8; A0A287EIZ3; F5A7G7; B5A816; Q84NE4; A0A2R4Q9T1; A0A346R8U2; F6KHQ0; Q40026; R4JB62; Q84U17; B5A813; F1C940; A0A0U3AIG6; Q5XXZ9; C8CCM8; D5FPE9; Q9XGF0; A0A287EFG2; A8CA05; Q3YB17; B2LWZ6; A0A346R8T9; Q84U16; A0A346R8T7; A0A2R4Q9V4;…	2	1047.59	9	H	H	H	H	H	H	H	2.76	2	524.301	1.03	10.8766
	H	QPHQLAQL		53	256	14	D0F0C5; K7WV80; A9YRN9; C6K8R4; A0A287EFH8; D0ES12; B2LWZ2; G0YLZ2; G9AYK6; A0A2P1BXV0; Q670S2; B5A810; C8CCM7; Q6J6V0; R4JAP5; A9YWM3; D3U329; P93794; J9QFV1; C6K8R8; A0A287EIZ3; F5A7G7; B5A816; Q84NE4; A0A2R4Q9T1; A0A346R8U2; F6KHQ0; Q40026; R4JB62; Q84U17; B5A813; F1C940; A0A0U3AIG6; Q5XXZ9; C8CCM8; D5FPE9; Q9XGF0; A0A287EFG2; A8CA05; Q3YB17; B2LWZ6; A0A346R8T9; Q84U16; A0A346R8T7; A0A2R4Q9V4;…	1	934.51	8	H	NF	H	H	H	H	H	1.53	2	467.759	0.32	5.8896
	H	QQPPFSQQQQQPIL	3xDeamidated [Q9; Q]	1	1	7	D5FPE9	1	1669.81	14	H	H	NF	NF	NF	H	NF	1.57	2	835.401	-7.01	17.684
	H	QQPQQQQL		26	108	96	G0YLZ2; A2IBK1; Q8W3X5; A0A2P1BXV0; A0A0U3ANN8; Q5XXZ7; R4JAP5; A9YWM3; D5FPF1; V9P785; F8SGM9; R4JB62; D5FPF3; A0A0U3AGE0; A0A0U3AIG6; C8CCM8; A2IBJ9; D5FPE9; A8CA05; F8SGM7; D4HNA5; D5FPF4; F5A7G6; Q68VI0; F8SGN9; B8Y0L6	0	997.506	8	H	H	H	H	H	H	H	2.65	1	997.505	-0.95	3.8091
	H	QQPQQQQL	1xGln->pyro-Glu [N-Term]	25	103	5	G0YLZ2; A2IBK1; Q8W3X5; A0A2P1BXV0; A0A0U3ANN8; Q5XXZ7; R4JAP5; A9YWM3; D5FPF1; V9P785; F8SGM9; R4JB62; D5FPF3; A0A0U3AIG6; C8CCM8; A2IBJ9; D5FPE9; A8CA05; F8SGM7; D4HNA5; D5FPF4; F5A7G6; Q68VI0; F8SGN9; B8Y0L6	0	980.48	8	NF	NF	NF	NF	H	H	H	1.55	2	490.743	-0.23	11.7416
	H	SQQQPPF		36	253	26	K7WV80; A0A3G3C4J5; K7WV72; B8XU59; P93792; Q8W3X5; A0A2P1BXV0; Q8W3V8; C8CCM7; Q6J6V0; R4JAP5; A9YWM3; D2DII6; D3U329; R4JFK3; R4JDM1; Q5MFK8; I3QPH1; A0A2R4Q9T1; A0A346R8U2; R4JB62; F1C940; A0A0U3AIG6; Q41552; K7XED4; D7RFI1; C8CCM8; F8SGM2; R4JD66; D5FPE9; A8CA05; A0A346R8T9; Q6B780; A0A2R4Q9V4; B2LX00; C6KI73	0	831.4	7	H	H	H	H	H	H	H	1.48	1	831.399	-1.26	10.1053
	H	SQQQQPPF		42	254	83	N1R0S5; A0A165R8I1; A9YRN9; B2LWZ2; A0A0A0R2J7; G9AYK6; A0A2P1BXV0; B5A810; C8CCM7; Q6J6V0; R4JFH5; Q5XXZ7; A9YWM3; Q6J6U9; A0A2R4Q9T7; D3U329; P93794; A0A0A0R2I8; B5A816; Q84NE4; A0A2R4Q9T1; Q2PQJ6; D0ES19; B5A813; A0A0U3AIG6; C8CCM8; D5FPE9; A0A2R4Q9U1; Q9XGF0; A8CA05; B2LWZ6; A0A346R8T9; Q84U16; T1LG74; A0A346R8T7; A0A346R8T6; A0A089VKK4; Q2L990; A0A0A0QYP7; A0A2R4Q9S5; B8XU51; X2JC88	0	959.458	8	H	H	H	H	H	H	H	2.1	2	480.233	-0.32	10.2887
	H	SQQQQQPLL		12	67	4	D3UAL8; A0A2P1BXV0; R4JAP5; V9P785; F8SGM9; R4JDM1; D5FPF3; A0A0U3AIG6; D5FPE9; F8SGM7; B2LWZ6; B2Y2R6	1	1069.56	9	NF	NF	NF	H	NF	NF	H	1.12	2	535.286	0.68	11.0239
	H	SQQQQQPLLPQQPPF		8	43	16	D3UAL8; A0A2P1BXV0; R4JAP5; F8SGM9; D5FPF3; D5FPE9; F8SGM7; B2Y2R6	2	1763.91	15	H	NF	NF	H	H	NF	H	1.92	2	882.457	-0.55	24.8687
	H	VHPSIL		36	208	822	I3XHQ0; D3UAL8; H9XGZ9; R9XVA5; A2IBJ7; D5FPE3; D0F0C4; C8CCM7; P06471; A2IBV5; Q0PIV6; A0A287EIZ3; Q8W3W8; R4JDM1; K0I5W1; Q40026; A0A0U3AGE0; A0A0U3AIG6; Q8W3X4; D5FPE9; Q9XGF0; A0A287EFG2; A7XDG0; I6TMW4; I6SJ22; A0A0U2JFU1; A8IEC6; A0A287EFF7; A0A0K2GRQ1; I6SW30; Q0Q2J1; Q8W3X0; A0A287EIW5; B2Y2R6; A8IEB4; A0A0U3ATU4	0	665.398	6	H	H	H	H	H	H	H	1.62	1	665.397	-0.94	7.2207
	H	VHPSILQQLNPCKVF	1xCarbamidomethyl [C12]	24	149	92	D3UAL8; R9XVA5; D5FPE3; C8CCM7; P06471; Q0PIV6; A0A287EIZ3; Q8W3W8; R4JDM1; K0I5W1; Q40026; A0A0U3AIG6; Q8W3X4; D5FPE9; Q9XGF0; A0A287EFG2; A7XDG0; I6TMW4; I6SJ22; I6SW30; Q0Q2J1; Q8W3X0; A0A287EIW5; B2Y2R6	2	1779.96	15	H	H	H	H	H	H	H	4.28	3	593.991	0.51	24.9486
TRUE	Master Protein	Q2QL52	Alpha-gliadin storage protein (Fragment) OS=Aegilops tauschii OX=37682 PE=4 SV=1	66.2835	26	893	1	1	261	30.1	7.8	H	H	H	H	H	H	H	1092.14	26
	Confidence	Sequence	Modifications	# Protein Groups	# Proteins	# PSMs	Master Protein Accessions	# Missed Cleavages	Theo. MH+ [Da]	Sequence Length	Found in Sample Group: 1_AG38Duetto	Found in Sample Group: 5_AG167PI	Found in Sample Group: S_Semola	Found in Sample Group: 4_AG77Neolatino	Found in Sample Group: 3_AG69Lloyd	Found in Sample Group: SI_SemolaIntegrale	Found in Sample Group: 2_AG33Colosseo	XCorr Sequest HT	Charge Sequest HT	m/z [Da] Sequest HT	DeltaM [ppm] Sequest HT	RT [min] Sequest HT
	H	CCQQLW	2xCarbamidomethyl [C1; C2]	34	250	44	A0A2R2Y432; Q2QL54; U3PUB1; I3RXY0; B5AH62; M4WH49; I3RXV8; A0A0E3URC2; G9I1S5; I3RXY2; Q2QL52; A0A0E3Z5J4; A8VZI4; A7LHC5; A0A291I1T3; M4WYH4; E0Z2G0; Q2QL42; A5JSA3; H8Y0E6; H8Y0H4; A9YRP1; U3PXH9; M4WER7; A9YRP3; R9XUL8; I0IT57; I3RXW9; Q2QL55; E0Z2G8; H8Y0E7; I0IT59; A9Z0K0; G9I1R9	1	894.36	6	H	H	H	H	H	H	H	1.45	1	894.359	-1.15	18.2015
	H	IHNVVHA		25	251	6	A0A2R2Y432; A0A0E3Z552; U3PUB1; I3RXY0; R9XST5; I3RXV8; I3RXY2; Q2QL52; A0A0E3Z5J4; A7LHC5; A0A2R2Y404; A0A291I1T3; M4WYH4; E0Z2G0; Q2QL42; A5JSA3; D2X6C9; M8AS61; U3PXH9; Q0GK30; R9XUL8; I3RXW9; E0Z2G8; M8ANS4; A0A0E3Z7K2	3	789.437	7	NF	H	NF	NF	NF	NF	NF	1.35	1	789.435	-1.41	2.9342
	H	IPCRDVVL	1xCarbamidomethyl [C3]	33	250	45	A0A2R2Y432; A0A0E3Z552; G9I1R6; U3PUB1; G9I1R5; I3RXY0; R9XST5; B5AH62; I3RXV8; A0A1P8DTB0; A0A0E3URC2; G9I1S5; I3RXY2; Q2QL52; A7LHC5; A0A2R2Y404; A0A291I1T3; M4WYH4; E0Z2G0; Q2QL42; A5JSA3; H8Y0E6; H8Y0H4; U3PXH9; R9XUL8; I0IT53; I0IT57; I3RXW9; B9VSJ1; E0Z2G8; H8Y0E7; I0IT59; G9I1R9	0	971.534	8	H	H	H	H	H	H	H	1.93	2	486.271	0.4	11.7739
	H	LQIQPF		23	255	99	A0A0E3Z552; I3RXY0; A0A1P8DT82; R9XST5; I3RXV8; A0A0E3URC4; G9I1S5; I3RXY2; Q2QL52; A0A1P8DSH1; A7LHC5; A0A291I1T3; M4WYH4; E0Z2G0; Q2QL42; A5JSA3; D2X6C9; U3PXH9; Q0GK30; A0A1P8DSE3; R9XUL8; E0Z2G8; A0A0E3Z7K2	1	745.424	6	H	H	H	H	NF	H	H	1.47	1	745.424	-0.8	24.676
	H	LQLQPFPQPQLPY		20	250	73	A0A1P8DSI8; I3RXY0; R9XST5; I3RXV8; G9I1S5; I3RXY2; Q2QL52; A0A291I1T3; M4WYH4; E0Z2G0; Q2QL42; D2X6C9; U3PXH9; Q0GK30; A0A1P8DSE3; R9XUL8; A0A1P8DT67; A0A0E3UQX9; E0Z2G8; A0A0E3Z7K2	4	1568.85	13	H	H	H	H	H	H	H	3.49	2	784.927	-0.42	33.5583
	H	QPSQRNPQAQGSVQPQQLPQFEEIRNL	2xDeamidated [Q]	1	1	6	Q2QL52	2	3119.55	27	H	H	NF	NF	NF	H	NF	1.99	4	780.65	9.38	22.5896
	H	QPSQRNPQAQGSVQPQQLPQFEEIRNL	1xDeamidated [Q/N]	1	1	39	Q2QL52	2	3118.57	27	NF	H	H	H	H	H	NF	2.14	4	780.4	3.95	22.9815
	H	QQILQQQLIPCRDVVL	1xCarbamidomethyl [C11]	30	250	4	A0A2R2Y432; A0A0E3Z552; Q2QL54; G9I1R6; U3PUB1; G9I1R5; I3RXY0; R9XST5; I3RXV8; A0A1P8DTB0; A0A0E3URC2; I3RXY2; Q2QL52; A7LHC5; A0A291I1T3; M4WYH4; E0Z2G0; Q2QL42; A5JSA3; H8Y0E6; U3PXH9; M4WER7; R9XUL8; I0IT53; I0IT57; X2L2G3; I3RXW9; E0Z2G8; I0IT59; G9I1R9	2	1951.08	16	NF	H	H	NF	NF	H	NF	1.76	2	976.043	-0.35	26.5051
	H	QQPQQQYPSGQGSF		35	255	19	H8Y0D2; U3PUB1; I3RXY0; R9XST5; B5AH62; M4WH49; I3RXV8; G9I1S5; A0A1P8DSN6; B8XU29; I3RXY2; Q2QL52; A0A1P8DSH1; A8VZI4; A7LHC5; A0A2R2Y404; A0A291I1T3; M4WYH4; Q2QL42; A5JSA3; R9XSV1; F5A7H0; H8Y0E6; H8Y0G8; U3PXH9; A7LHB8; I3RXX8; X2L2G3; I3RXW9; Q2QL55; H8Y0E3; E0Z2G8; Q2QL53; H8Y0E7; G9I1R9	1	1579.71	14	H	H	H	H	H	H	H	1.81	2	790.36	-1.17	12.3516
	H	QQQLIPCRDVVL	1xCarbamidomethyl [C7]	33	250	98	A0A2R2Y432; A0A0E3Z552; Q2QL54; G9I1R6; U3PUB1; G9I1R5; I3RXY0; R9XST5; I3RXV8; A0A1P8DTB0; A0A0E3URC2; G9I1S5; I3RXY2; Q2QL52; A7LHC5; A0A291I1T3; M4WYH4; E0Z2G0; Q2QL42; A5JSA3; H8Y0E6; U3PXH9; M4WER7; R9XUL8; I0IT53; I0IT57; X2L2G3; I3RXW9; B9VSJ1; E0Z2G8; H8Y0E7; I0IT59; G9I1R9	1	1468.79	12	H	H	H	H	H	H	H	3.19	2	734.9	-0.79	20.3889
	H	QQQLIPCRDVVL	1xGln->pyro-Glu [N-Term]; 1xCarbamidomethyl [C7]	33	250	33	A0A2R2Y432; A0A0E3Z552; Q2QL54; G9I1R6; U3PUB1; G9I1R5; I3RXY0; R9XST5; I3RXV8; A0A1P8DTB0; A0A0E3URC2; G9I1S5; I3RXY2; Q2QL52; A7LHC5; A0A291I1T3; M4WYH4; E0Z2G0; Q2QL42; A5JSA3; H8Y0E6; U3PXH9; M4WER7; R9XUL8; I0IT53; I0IT57; X2L2G3; I3RXW9; B9VSJ1; E0Z2G8; H8Y0E7; I0IT59; G9I1R9	1	1451.77	12	H	H	H	H	H	H	H	2.34	2	726.387	-1.18	28.8486
	H	RPQQPYPQPQPQY		23	250	136	A0A1P8DSI8; U3PUB1; I3RXY0; A0A1P8DT82; R9XST5; I3RXV8; Q2QL52; A7LHC5; A0A291I1T3; M4WYH4; E0Z2G0; Q2QL42; A5JSA3; D2X6C9; U3PXH9; Q0GK30; A0A1P8DSE3; R9XUL8; A0A0E3UQX9; I3RXX8; I3RXW9; A0A1P8DT27; A0A0E3Z7K2	1	1626.8	13	H	H	H	H	H	H	H	3.18	2	813.904	-1.36	8.8088
	H	VRVPVPQLQPQNPSQQQPQEQVPL		27	253	373	A0A2R2Y432; G9I1R6; I3RXY0; A0A1P8DT82; R9XST5; I3RXV8; A0A1P8DTB0; A0A0E3URC4; A0A0E3URC2; Q41533; Q2QL52; A0A1P8DSH1; A0A0E3Z5J4; A0A291I1T3; M4WYH4; E0Z2G0; Q2QL42; A5JSA3; U3PXH9; Q0GK30; I0IT53; I0IT57; I3RXW9; H8Y0E7; I0IT59; G9I1R9; A0A0E3Z7K2	1	2734.46	24	H	H	H	H	H	H	H	5.68	2	1367.74	-0.2	23.137
TRUE	Master Protein	I0IT59	Alpha/beta-gliadin OS=Triticum aestivum OX=4565 GN=Gli-2 PE=4 SV=1	77.027	34	1425	3	1	296	34.1	7.3	H	H	H	H	H	H	H	1090.69	34
	Confidence	Sequence	Modifications	# Protein Groups	# Proteins	# PSMs	Master Protein Accessions	# Missed Cleavages	Theo. MH+ [Da]	Sequence Length	Found in Sample Group: 1_AG38Duetto	Found in Sample Group: 5_AG167PI	Found in Sample Group: S_Semola	Found in Sample Group: 4_AG77Neolatino	Found in Sample Group: 3_AG69Lloyd	Found in Sample Group: SI_SemolaIntegrale	Found in Sample Group: 2_AG33Colosseo	XCorr Sequest HT	Charge Sequest HT	m/z [Da] Sequest HT	DeltaM [ppm] Sequest HT	RT [min] Sequest HT
	H	ALQTLPAMCNVY	1xCarbamidomethyl [C9]	25	250	84	A0A0E3Z552; G9I1R6; G9I1R5; A0A1P8DT82; A0A1P8DTB0; A0A0E3URC4; G9I1S5; A0A1P8DSN6; A8VZI4; H8Y0G8; D2X6C9; M8AS61; A9YRP1; Q0GK30; A0A1P8DSE3; M4WER7; A9YRP3; I0IT53; A0A0E3UQX9; I0IT57; X2KWD8; A0A1P8DT27; I0IT59; A9Z0K0; A0A0E3Z7K2	2	1380.67	12	H	H	H	H	H	H	H	2.23	2	690.836	-0.04	26.2605
	H	CCQQLW	2xCarbamidomethyl [C1; C2]	34	250	44	A0A2R2Y432; Q2QL54; U3PUB1; I3RXY0; B5AH62; M4WH49; I3RXV8; A0A0E3URC2; G9I1S5; I3RXY2; Q2QL52; A0A0E3Z5J4; A8VZI4; A7LHC5; A0A291I1T3; M4WYH4; E0Z2G0; Q2QL42; A5JSA3; H8Y0E6; H8Y0H4; A9YRP1; U3PXH9; M4WER7; A9YRP3; R9XUL8; I0IT57; I3RXW9; Q2QL55; E0Z2G8; H8Y0E7; I0IT59; A9Z0K0; G9I1R9	1	894.36	6	H	H	H	H	H	H	H	1.45	1	894.359	-1.15	18.2015
	H	CSTTIAPF	1xCarbamidomethyl [C1]	29	195	20	A0A2R2Y432; A0A142L078; G9I1R6; H8Y0G1; I0IT58; B5AH62; M4WH49; H8Y0F3; B1PDK7; A0A1P8DSN6; A0A0E3URD6; B8XU29; A0A0E3Z5J4; K4NYM6; A0A1P8DT06; A0A0K2QJ82; M8AS61; H8Y0H4; A9YRP1; A0A0K2QJD8; A0A1P8DSE3; I0IT53; I0IT57; F4YT75; A0A023WGX2; A0A1P8DTC2; E5FF17; I0IT59; A0A1P8DSB7	0	896.418	8	H	H	H	H	H	H	H	1.33	1	896.417	-1.04	19.929
	H	FQPSQQNPQAQGF		5	12	41	I0IT58; I0IT53; I0IT57; A0A023WGX2; I0IT59	1	1476.69	13	H	H	H	H	H	H	H	2.53	2	738.846	-0.78	13.8888
	H	GIMSTN		5	14	63	I0IT58; I0IT53; I0IT57; A0A023WGX2; I0IT59	0	622.286	6	H	H	H	H	H	H	H	1.82	1	622.286	-1.16	5.1001
	H	IHNVIHA		6	23	4	I0IT58; B1PDK7; A0A1P8DSN6; I0IT53; I0IT57; I0IT59	3	803.452	7	NF	H	NF	NF	NF	NF	NF	1.06	2	402.229	-1.28	3.1759
	H	IPCRDVVL	1xCarbamidomethyl [C3]	33	250	45	A0A2R2Y432; A0A0E3Z552; G9I1R6; U3PUB1; G9I1R5; I3RXY0; R9XST5; B5AH62; I3RXV8; A0A1P8DTB0; A0A0E3URC2; G9I1S5; I3RXY2; Q2QL52; A7LHC5; A0A2R2Y404; A0A291I1T3; M4WYH4; E0Z2G0; Q2QL42; A5JSA3; H8Y0E6; H8Y0H4; U3PXH9; R9XUL8; I0IT53; I0IT57; I3RXW9; B9VSJ1; E0Z2G8; H8Y0E7; I0IT59; G9I1R9	0	971.534	8	H	H	H	H	H	H	H	1.93	2	486.271	0.4	11.7739
	H	LGQQQQQFPGQQQPFPPQQPYPQPQPF	1xDeamidated [Q]	4	10	42	I0IT53; I0IT57; A0A023WGX2; I0IT59	4	3164.52	27	NF	H	H	H	NF	H	H	1.31	3	1055.52	5.89	29.9358
	H	LGQQQQQFPGQQQPFPPQQPYPQPQPF		4	10	126	I0IT53; I0IT57; A0A023WGX2; I0IT59	4	3163.54	27	H	H	H	H	H	H	H	2.91	3	1055.18	-0.58	27.9021
	H	LPQLPYPQPQPF		13	73	19	I0IT58; A0A1K0ITF9; M4WH49; A0A1P8DSN6; A0A1K0K0Q0; G9I1T5; A8VZI4; A0A2R2Y404; I0IT53; I0IT57; A0A023WGX2; Q2QL53; I0IT59	3	1424.76	12	NF	NF	H	NF	H	H	NF	2.16	2	712.882	-0.87	30.8953
	H	QILQQL	1xGln->pyro-Glu [N-Term]	36	254	26	A0A2R2Y432; A0A0A9LIL8; A0A0E3Z552; Q2QL54; A0A142L078; G9I1R6; I0IT58; A0A1K0ITF9; G9I1R5; A0A0E3URC4; A0A1P8DSN6; A0A1K0K0Q0; H8Y0G3; G9I1T5; A0A0E3Z5J4; A0A0E3UQY6; A0A2R2Y404; K4NYM6; A0A1P8DS55; A0A0K2QJ82; A0A1K0ISY9; M8AS61; Q1WA40; A0A0K2QJD8; A7LHB8; I0IT53; A0A142L083; I0IT57; X2L2G3; X2KWD8; X2KWE1; Q2QL53; I0IT59; K4PC84	1	725.419	6	NF	H	H	H	NF	H	NF	1.25	1	725.419	-0.71	36.2048
	H	QQILQQQLIPCRDVVL	1xCarbamidomethyl [C11]	30	250	4	A0A2R2Y432; A0A0E3Z552; Q2QL54; G9I1R6; U3PUB1; G9I1R5; I3RXY0; R9XST5; I3RXV8; A0A1P8DTB0; A0A0E3URC2; I3RXY2; Q2QL52; A7LHC5; A0A291I1T3; M4WYH4; E0Z2G0; Q2QL42; A5JSA3; H8Y0E6; U3PXH9; M4WER7; R9XUL8; I0IT53; I0IT57; X2L2G3; I3RXW9; E0Z2G8; I0IT59; G9I1R9	2	1951.08	16	NF	H	H	NF	NF	H	NF	1.76	2	976.043	-0.35	26.5051
	H	QQPNIAHASSQVSQQSY		3	14	27	I0IT58; I0IT57; I0IT59	0	1872.88	17	H	H	H	H	H	H	H	3.09	2	936.944	-0.98	8.9669
	H	QQPQQQYPSGQGF		9	69	120	I0IT58; A7LHC6; A0A023WGF7; I0IT53; I0IT57; F4YT75; A0A023WGX2; I0IT59; R9XSU5	1	1492.68	13	H	H	H	H	H	H	H	3.71	2	746.844	-0.71	13.0623
	H	QQQLIPCRDVVL	1xCarbamidomethyl [C7]	33	250	98	A0A2R2Y432; A0A0E3Z552; Q2QL54; G9I1R6; U3PUB1; G9I1R5; I3RXY0; R9XST5; I3RXV8; A0A1P8DTB0; A0A0E3URC2; G9I1S5; I3RXY2; Q2QL52; A7LHC5; A0A291I1T3; M4WYH4; E0Z2G0; Q2QL42; A5JSA3; H8Y0E6; U3PXH9; M4WER7; R9XUL8; I0IT53; I0IT57; X2L2G3; I3RXW9; B9VSJ1; E0Z2G8; H8Y0E7; I0IT59; G9I1R9	1	1468.79	12	H	H	H	H	H	H	H	3.19	2	734.9	-0.79	20.3889
	H	QQQLIPCRDVVL	1xGln->pyro-Glu [N-Term]; 1xCarbamidomethyl [C7]	33	250	33	A0A2R2Y432; A0A0E3Z552; Q2QL54; G9I1R6; U3PUB1; G9I1R5; I3RXY0; R9XST5; I3RXV8; A0A1P8DTB0; A0A0E3URC2; G9I1S5; I3RXY2; Q2QL52; A7LHC5; A0A291I1T3; M4WYH4; E0Z2G0; Q2QL42; A5JSA3; H8Y0E6; U3PXH9; M4WER7; R9XUL8; I0IT53; I0IT57; X2L2G3; I3RXW9; B9VSJ1; E0Z2G8; H8Y0E7; I0IT59; G9I1R9	1	1451.77	12	H	H	H	H	H	H	H	2.34	2	726.387	-1.18	28.8486
	H	QTLPAMCNVY	1xCarbamidomethyl [C7]	27	251	5	A0A0E3Z552; G9I1R6; G9I1R5; A0A1P8DT82; A0A1P8DTB0; A0A0E3URC4; G9I1S5; A0A1P8DSN6; A0A1P8DSH1; A8VZI4; A0A1P8DSY8; H8Y0G8; D2X6C9; M8AS61; A9YRP1; Q0GK30; A0A1P8DSE3; M4WER7; A9YRP3; I0IT53; A0A0E3UQX9; I0IT57; X2KWD8; A0A1P8DT27; I0IT59; A9Z0K0; A0A0E3Z7K2	1	1196.54	10	NF	H	H	H	NF	H	NF	1.45	2	598.775	-1	21.3197
	H	VRVPVPQLQPQNPSQQQPQEQVPL		27	253	373	A0A2R2Y432; G9I1R6; I3RXY0; A0A1P8DT82; R9XST5; I3RXV8; A0A1P8DTB0; A0A0E3URC4; A0A0E3URC2; Q41533; Q2QL52; A0A1P8DSH1; A0A0E3Z5J4; A0A291I1T3; M4WYH4; E0Z2G0; Q2QL42; A5JSA3; U3PXH9; Q0GK30; I0IT53; I0IT57; I3RXW9; H8Y0E7; I0IT59; G9I1R9; A0A0E3Z7K2	1	2734.46	24	H	H	H	H	H	H	H	5.68	2	1367.74	-0.2	23.137
	H	XPPY		48	754	523	A0A2R2Y432; A0A1D6PVA1; U3PUB1; I3RXY0; R9XST5; I3RXV8; N1QY29; A0A1D6PVM1; B6SIP3; Q2QW32; A0A1D6KZ84; G9I1S5; A0A1D6HD02; C5YAM7; A0A0Q3EYP3; I3RXY2; Q8H344; A0A0E3Z5J4; A7LHC5; A0A2R2Y404; A0A291I1T3; A0A2K2CRT5; Q0IS09; M4WYH4; E0Z2G0; H8Y0D1; A5JSA3; M8D541; K7VGB7; K7VQS8; M8AS61; A0A194YQ58; U3PXH9; Q0GK30; A0A1D6GM06; R9XUL8; I0IT53; A0A1D6PVH3; I1J1J8; I0IT57; I3RXW9; B6SII5; E0Z2G8; I0I…	0	489.271	4	H	H	H	H	H	H	H	1.33	1	489.271	-0.08	9.3314
TRUE	Master Protein	A0A0A0QYP7	Low molecular weight glutenin subunit OS=Triticum urartu OX=4572 GN=LMW-GS PE=4 SV=1	72.3343	40	1111	1	1	347	39.7	8.13	H	H	H	H	H	H	H	1082.2	40
	Confidence	Sequence	Modifications	# Protein Groups	# Proteins	# PSMs	Master Protein Accessions	# Missed Cleavages	Theo. MH+ [Da]	Sequence Length	Found in Sample Group: 1_AG38Duetto	Found in Sample Group: 5_AG167PI	Found in Sample Group: S_Semola	Found in Sample Group: 4_AG77Neolatino	Found in Sample Group: 3_AG69Lloyd	Found in Sample Group: SI_SemolaIntegrale	Found in Sample Group: 2_AG33Colosseo	XCorr Sequest HT	Charge Sequest HT	m/z [Da] Sequest HT	DeltaM [ppm] Sequest HT	RT [min] Sequest HT
	H	AHGTF		21	178	41	Q38L53; G9AYK6; X2J8E3; F1C945; Q5MFH0; R9XUD0; P93794; A0A1U9XLA9; Q84NE4; F1C943; X2JAE7; A0A1D6L3W9; D0ES16; Q9XGF0; Q84U16; Q6QGW0; A0A089VKK4; Q2L990; A0A0A0QYP7; K7R468; Q38L52	0	532.251	5	H	NF	H	H	H	H	H	1.46	1	532.251	-0.49	3.0046
	H	ARSQML		49	270	7	D0F0C5; J9QEK9; D0ES12; B2LWZ2; G0YLZ2; G9AYK6; A0A2P1BXV0; B5A810; C8CCM7; Q6J6V0; R4JFH5; A0A346R8U1; R4JAP5; A9YWM3; D3U329; P93794; J9QFV1; C6K8R8; A0A287EIZ3; F5A7G7; B5A816; Q84NE4; A0A2R4Q9T1; A0A346R8U2; F6KHQ0; R4JB62; D0ES19; B5A813; F1C940; A0A0U3AIG6; Q5XXZ9; D5FPE9; Q9XGF0; A8CA05; Q3YB17; B2LWZ6; A0A346R8T9; Q84U16; T1LG74; A0A346R8T7; A0A2R4Q9V4; A0A346R8T6; A0A089VKK4; Q2L990; A0A…	0	705.371	6	H	NF	H	H	H	H	H	1.23	1	705.37	-1.74	3.2777
	H	GQQPQQQQL		29	250	39	D0F0C5; K7WV80; A0A3G3C4J5; A0A165R8I1; D0ES12; R9XVA5; A0A0A0R2J7; G9AYK6; X2J8E3; R4JFH5; P93794; Q84NE4; R4JDM1; Q5MFK8; Q2PQJ6; A0A346R8U2; D0ES19; F1C940; Q9XGF0; Q3YB17; Q5MFH4; T1LG74; A0A346R8T7; A0A2R4Q9V4; A0A089VKK4; Q2L990; A0A0A0QYP7; B8XU51; B2LX00	0	1054.53	9	H	H	H	H	H	H	H	2.05	1	1054.53	-0.47	3.9132
	H	GVGIGVGVY		17	100	18	Q38L53; A0A0A0R2J7; R9XV91; Q670S2; Q5MFH0; Q38L54; P93794; A0A1U9XLA9; Q84NE4; A0A1G4P206; Q2PQJ6; Q6QGW0; A0A089VKK4; Q2L990; A0A0A0QYP7; K7R468; Q38L52	0	820.456	9	H	NF	NF	H	NF	H	H	1.71	1	820.455	-1.38	21.6236
	H	LQPHQLAQL		53	256	324	D0F0C5; K7WV80; A9YRN9; C6K8R4; A0A287EFH8; D0ES12; B2LWZ2; G0YLZ2; G9AYK6; A0A2P1BXV0; Q670S2; B5A810; C8CCM7; Q6J6V0; R4JAP5; A9YWM3; D3U329; P93794; J9QFV1; C6K8R8; A0A287EIZ3; F5A7G7; B5A816; Q84NE4; A0A2R4Q9T1; A0A346R8U2; F6KHQ0; Q40026; R4JB62; Q84U17; B5A813; F1C940; A0A0U3AIG6; Q5XXZ9; C8CCM8; D5FPE9; Q9XGF0; A0A287EFG2; A8CA05; Q3YB17; B2LWZ6; A0A346R8T9; Q84U16; A0A346R8T7; A0A2R4Q9V4;…	2	1047.59	9	H	H	H	H	H	H	H	2.76	2	524.301	1.03	10.8766
	H	QPHQLAQL		53	256	14	D0F0C5; K7WV80; A9YRN9; C6K8R4; A0A287EFH8; D0ES12; B2LWZ2; G0YLZ2; G9AYK6; A0A2P1BXV0; Q670S2; B5A810; C8CCM7; Q6J6V0; R4JAP5; A9YWM3; D3U329; P93794; J9QFV1; C6K8R8; A0A287EIZ3; F5A7G7; B5A816; Q84NE4; A0A2R4Q9T1; A0A346R8U2; F6KHQ0; Q40026; R4JB62; Q84U17; B5A813; F1C940; A0A0U3AIG6; Q5XXZ9; C8CCM8; D5FPE9; Q9XGF0; A0A287EFG2; A8CA05; Q3YB17; B2LWZ6; A0A346R8T9; Q84U16; A0A346R8T7; A0A2R4Q9V4;…	1	934.51	8	H	NF	H	H	H	H	H	1.53	2	467.759	0.32	5.8896
	H	QQQLGQQPQQQQL	1xGln->pyro-Glu [N-Term]	26	166	3	Q38L53; A0A0A0R2J7; G9AYK6; X2J8E3; F1C945; R9XV91; Q5MFH0; R9XUD0; P93794; A0A1U9XLA9; Q84NE4; A0A1G4P206; Q2PQJ6; A0A346R8U2; X2JAE7; D0ES19; D0ES20; D0ES16; R4JB44; Q6QGW0; A2IBV2; A0A089VKK4; Q2L990; A0A0A0QYP7; B2LX00; Q38L52	1	1534.76	13	H	NF	NF	NF	NF	NF	H	1.21	2	767.885	0.84	18.0764
	H	QQQLGQQPQQQQL		26	166	23	Q38L53; A0A0A0R2J7; G9AYK6; X2J8E3; F1C945; R9XV91; Q5MFH0; R9XUD0; P93794; A0A1U9XLA9; Q84NE4; A0A1G4P206; Q2PQJ6; A0A346R8U2; X2JAE7; D0ES19; D0ES20; D0ES16; R4JB44; Q6QGW0; A2IBV2; A0A089VKK4; Q2L990; A0A0A0QYP7; B2LX00; Q38L52	1	1551.79	13	H	H	H	H	H	H	H	2.97	2	776.396	-1.49	9.8089
	H	QQQQPQQL	1xGln->pyro-Glu [N-Term]	15	118	3	Q38L53; A0A0A0R2J7; X2J8E3; R9XV91; Q38L54; R9XUD0; P93794; A0A1G4P206; Q2PQJ6; X2JAE7; R4JB44; A0A089VKK4; Q2L990; A0A0A0QYP7; K7R468	0	980.48	8	H	NF	NF	NF	NF	NF	H	1.28	1	980.479	-1.09	11.6668
	H	QQQQPQQL		19	159	18	Q38L53; A0A0A0R2J7; X2J8E3; R9XV91; Q38L54; R9XUD0; P93794; A0A1G4P206; A0A0N9LF97; Q2PQJ6; X2JAE7; R4JB44; A2IBV2; T1LG74; A0A089VKK4; Q2L990; A0A0A0QYP7; K7R468; A0A068F9M3	0	997.506	8	H	NF	NF	NF	H	H	H	2.21	1	997.505	-1.13	4.0839
	H	RQIPEQSRHESIRAIVY		8	68	322	R9XV91; Q38L54; R9XUD0; Q2PQJ6; D0ES19; D0ES20; A0A089VKK4; A0A0A0QYP7	0	2082.12	17	H	NF	NF	NF	NF	H	H	4.13	4	521.287	2.56	5.77
	H	SQQPPISQQQQPPF		28	161	10	A0A0A0R2J7; G9AYK6; X2J8E3; F1C945; R9XV91; Q5MFH0; Q38L54; R4JFH5; R9XUD0; R9YTM4; P93794; A0A0A0R2I8; A0A1U9XLA9; C6KI71; Q84NE4; F1C943; A0A1G4P206; Q2PQJ6; X2JAE7; D0ES16; R4JB44; Q6QGW0; T1LG74; A0A089VKK4; A0A0A0QYP7; K7R468; V9P6N2; Q38L52	0	1609.8	14	H	NF	NF	H	NF	H	H	1.32	2	805.401	-0.74	17.0117
	H	SQQPPISQQQQPPFSQQQQPPFSQQQQIPVIHPSVL		17	98	20	G9AYK6; F1C945; R9XV91; Q5MFH0; Q38L54; R4JFH5; A0A1U9XLA9; Q84NE4; F1C943; A0A1G4P206; X2JAE7; D0ES16; R4JB44; Q6QGW0; A0A089VKK4; A0A0A0QYP7; K7R468	2	4105.09	36	H	H	H	H	H	H	H	3.74	3	1369.03	-0.16	28.3134
	H	SQQQQIPVIHPSVL		28	173	108	Q38L53; A0A0A0R2J7; G9AYK6; X2J8E3; F1C945; R9XV91; Q5MFH0; Q38L54; R4JFH5; R9XUD0; R9YTM4; P93794; A0A1U9XLA9; Q84NE4; F1C943; A0A1G4P206; X2JAE7; D0ES19; D0ES20; D0ES16; R4JB44; Q6QGW0; T1LG74; A0A089VKK4; Q2L990; A0A0A0QYP7; K7R468; V9P6N2	0	1573.87	14	H	H	H	H	H	H	H	3.7	2	787.438	-0.3	20.1699
	H	SQQQQPPF		42	254	83	N1R0S5; A0A165R8I1; A9YRN9; B2LWZ2; A0A0A0R2J7; G9AYK6; A0A2P1BXV0; B5A810; C8CCM7; Q6J6V0; R4JFH5; Q5XXZ7; A9YWM3; Q6J6U9; A0A2R4Q9T7; D3U329; P93794; A0A0A0R2I8; B5A816; Q84NE4; A0A2R4Q9T1; Q2PQJ6; D0ES19; B5A813; A0A0U3AIG6; C8CCM8; D5FPE9; A0A2R4Q9U1; Q9XGF0; A8CA05; B2LWZ6; A0A346R8T9; Q84U16; T1LG74; A0A346R8T7; A0A346R8T6; A0A089VKK4; Q2L990; A0A0A0QYP7; A0A2R4Q9S5; B8XU51; X2JC88	0	959.458	8	H	H	H	H	H	H	H	2.1	2	480.233	-0.32	10.2887
	H	SQQQQPPFSQQQQIPVIHPSVL		22	127	39	Q38L53; G9AYK6; F1C945; R9XV91; Q5MFH0; Q38L54; R4JFH5; A0A1U9XLA9; Q84NE4; F1C943; A0A1G4P206; X2JAE7; D0ES19; D0ES20; D0ES16; R4JB44; Q6QGW0; T1LG74; A0A089VKK4; Q2L990; A0A0A0QYP7; K7R468	1	2514.31	22	H	H	H	H	H	H	H	3.15	2	1257.66	0.06	25.1568
	H	SQQQQPPFSQQQQIPVIHPSVL	1xDeamidated [Q]	22	124	4	Q38L53; G9AYK6; F1C945; R9XV91; Q5MFH0; Q38L54; R4JFH5; A0A1U9XLA9; Q84NE4; F1C943; A0A1G4P206; X2JAE7; D0ES19; D0ES20; D0ES16; R4JB44; Q6QGW0; T1LG74; A0A089VKK4; Q2L990; A0A0A0QYP7; K7R468	1	2515.29	22	NF	NF	H	NF	NF	NF	NF	1.07	2	1258.16	9.33	25.1861
	H	SQQQQPPFSQQQQPPF		49	266	54	A0A165R8I1; D3UAL8; B2LWZ2; R9XVA5; A0A0A0R2J7; G9AYK6; X2J8E3; F1C945; R9XV91; Q5MFH0; D5FPE3; B5A810; Q38L54; R4JFH5; A2IBV5; R9XUD0; P93794; A0A0A0R2I8; A0A1U9XLA9; C6KI71; Q8W3W8; Q84NE4; F1C943; A0A1G4P206; Q2PQJ6; X2JAE7; D0ES19; A0A024A269; Q8W3X4; D0ES20; D0ES16; R4JB44; Q9XGF0; A7XDG0; B2LWZ6; Q84U16; Q6QGW0; A0A068F8R5; T1LG74; A0A346R8T6; A0A089VKK4; A0A0A0QYP7; K7R468; B8XU51; V9P6N2;…	1	1899.9	16	H	H	H	H	H	H	H	4	2	950.452	-0.53	20.9553
	H	SQQQQPPFSQQQQSPF		19	141	31	G9AYK6; X2J8E3; Q5MFH0; Q38L54; R9XUD0; A0A0A0R2I8; A0A1U9XLA9; Q84NE4; A0A1G4P206; X2JAE7; D0ES16; R4JB44; Q6QGW0; T1LG74; A0A089VKK4; A0A0A0QYP7; B8XU51; V9P6N2; Q38L52	1	1889.88	16	H	H	H	H	H	H	H	2.9	2	945.442	-1	20.0925
	H	SQQQQPPFSQQQQSPFLQQQQSPF	1xDeamidated [Q21]	1	1	20	A0A0A0QYP7	3	2847.33	24	H	NF	NF	NF	NF	H	H	2.4	3	949.787	4.17	25.0476
	H	SQQQQPPY		25	148	10	A0A0A0R2J7; G9AYK6; X2J8E3; F1C945; R9XV91; Q5MFH0; Q38L54; R9XUD0; P93794; A0A0A0R2I8; A0A1U9XLA9; Q84NE4; F1C943; A0A1G4P206; Q2PQJ6; D0ES19; D0ES20; D0ES16; R4JB44; Q6QGW0; A0A089VKK4; Q2L990; A0A0A0QYP7; B8XU51; Q38L52	0	975.453	8	H	H	H	H	H	NF	H	1.11	1	975.453	-0.41	4.4971
	H	SQQQQPQFSQQQQPPY		14	93	9	A0A0A0R2J7; G9AYK6; X2J8E3; Q5MFH0; P93794; A0A0A0R2I8; A0A1U9XLA9; Q84NE4; D0ES16; R4JB44; Q6QGW0; A0A089VKK4; A0A0A0QYP7; Q38L52	1	1946.9	16	NF	H	H	H	H	NF	NF	1.54	2	973.953	-0.33	13.8286
	H	SQQQQSPF		27	170	15	A0A0A0R2J7; G9AYK6; X2J8E3; F1C945; Q5MFH0; Q38L54; R9XUD0; A5JJ45; A0A0A0R2I8; A0A1U9XLA9; Q84NE4; F1C943; A0A1G4P206; X2JAE7; D0ES19; D0ES20; D0ES16; R4JB44; Q6QGW0; T1LG74; A0A346R8T7; A0A089VKK4; Q2L990; A0A0A0QYP7; B8XU51; V9P6N2; Q38L52	0	949.437	8	H	H	H	NF	H	H	H	1.32	1	949.436	-1.29	9.0241
TRUE	Master Protein	I3RXV8	Alpha-gliadin protein OS=Aegilops tauschii OX=37682 GN=gli-1 PE=4 SV=1	68.9286	34	1045	2	1	280	32	7.36	H	H	H	H	H	H	H	1057.88	34
	Confidence	Sequence	Modifications	# Protein Groups	# Proteins	# PSMs	Master Protein Accessions	# Missed Cleavages	Theo. MH+ [Da]	Sequence Length	Found in Sample Group: 1_AG38Duetto	Found in Sample Group: 5_AG167PI	Found in Sample Group: S_Semola	Found in Sample Group: 4_AG77Neolatino	Found in Sample Group: 3_AG69Lloyd	Found in Sample Group: SI_SemolaIntegrale	Found in Sample Group: 2_AG33Colosseo	XCorr Sequest HT	Charge Sequest HT	m/z [Da] Sequest HT	DeltaM [ppm] Sequest HT	RT [min] Sequest HT
	H	CCQQLW	2xCarbamidomethyl [C1; C2]	34	250	44	A0A2R2Y432; Q2QL54; U3PUB1; I3RXY0; B5AH62; M4WH49; I3RXV8; A0A0E3URC2; G9I1S5; I3RXY2; Q2QL52; A0A0E3Z5J4; A8VZI4; A7LHC5; A0A291I1T3; M4WYH4; E0Z2G0; Q2QL42; A5JSA3; H8Y0E6; H8Y0H4; A9YRP1; U3PXH9; M4WER7; A9YRP3; R9XUL8; I0IT57; I3RXW9; Q2QL55; E0Z2G8; H8Y0E7; I0IT59; A9Z0K0; G9I1R9	1	894.36	6	H	H	H	H	H	H	H	1.45	1	894.359	-1.15	18.2015
	H	FGTN		24	250	9	A0A2R2Y432; A0A0E3Z552; U3PUB1; I3RXY0; R9XST5; I3RXV8; G9I1S5; I3RXY2; A0A0E3Z5J4; A7LHC5; A0A2R2Y404; A0A291I1T3; M4WYH4; E0Z2G0; H8Y0D1; A5JSA3; D2X6C9; M8AS61; U3PXH9; Q0GK30; R9XUL8; I3RXW9; E0Z2G8; A0A0E3Z7K2	1	438.198	4	H	H	H	H	H	H	H	1.04	1	438.198	0.3	30.7198
	H	GIFGTN		44	372	134	A0A2R2Y432; A0A1P8DSI8; A0A0E3Z552; G9I1R6; U3PUB1; G9I1R5; I3RXY0; A0A1P8DT82; R9XST5; M4WH49; I3RXV8; A0A1P8DTB0; A0A0E3URC4; G9I1S5; A0A1P8DSN6; I3RXY2; A0A1P8DSH1; A0A0E3Z5J4; A7LHC5; A0A291I1T3; M4WYH4; E0Z2G0; H8Y0D1; A5JSA3; A0A1P8DSY8; F5A7H0; H8Y0E6; D2X6C9; M8AS61; A9YRP1; U3PXH9; Q0GK30; A0A1P8DSE3; M4WER7; R9XUL8; A7LHB8; A0A0E3UQX9; X2L2G3; X2KWD8; I3RXW9; E0Z2G8; A0A1P8DT27; H8Y0E7;…	1	608.304	6	H	H	H	H	H	H	H	1.65	1	608.304	0.47	15.7513
	H	IGQQQPFPPQQPYPQPQPFPSQQPY		14	259	699	A0A1P8DSI8; A0A1P8DT82; M4WFC9; I3RXV8; Q41533; A0A1P8DT06; A0A023WGB8; A0A0E3URA8; D2X6C9; A0A0K2QJD8; Q0GK30; A0A1P8DSE3; A0A1P8DSG6; R9XU77	3	2922.42	25	H	H	H	H	H	H	H	4.46	2	1461.71	-0.59	26.6583
	H	IHNVVHA		25	251	6	A0A2R2Y432; A0A0E3Z552; U3PUB1; I3RXY0; R9XST5; I3RXV8; I3RXY2; Q2QL52; A0A0E3Z5J4; A7LHC5; A0A2R2Y404; A0A291I1T3; M4WYH4; E0Z2G0; Q2QL42; A5JSA3; D2X6C9; M8AS61; U3PXH9; Q0GK30; R9XUL8; I3RXW9; E0Z2G8; M8ANS4; A0A0E3Z7K2	3	789.437	7	NF	H	NF	NF	NF	NF	NF	1.35	1	789.435	-1.41	2.9342
	H	IPCRDVVL	1xCarbamidomethyl [C3]	33	250	45	A0A2R2Y432; A0A0E3Z552; G9I1R6; U3PUB1; G9I1R5; I3RXY0; R9XST5; B5AH62; I3RXV8; A0A1P8DTB0; A0A0E3URC2; G9I1S5; I3RXY2; Q2QL52; A7LHC5; A0A2R2Y404; A0A291I1T3; M4WYH4; E0Z2G0; Q2QL42; A5JSA3; H8Y0E6; H8Y0H4; U3PXH9; R9XUL8; I0IT53; I0IT57; I3RXW9; B9VSJ1; E0Z2G8; H8Y0E7; I0IT59; G9I1R9	0	971.534	8	H	H	H	H	H	H	H	1.93	2	486.271	0.4	11.7739
	H	LGQQQPFPPQQPY		14	259	9	A0A1P8DSI8; A0A1P8DT82; M4WFC9; I3RXV8; Q41533; M4WEQ6; H9NAK8; A0A1P8DT06; A0A023WGB8; D2X6C9; Q0GK30; A0A1P8DSE3; A0A1P8DSG6; A0A0E3Z7K2	2	1527.76	13	NF	NF	H	NF	H	NF	NF	1.04	2	764.38	-3.74	17.7657
	H	LQIQPF		23	255	99	A0A0E3Z552; I3RXY0; A0A1P8DT82; R9XST5; I3RXV8; A0A0E3URC4; G9I1S5; I3RXY2; Q2QL52; A0A1P8DSH1; A7LHC5; A0A291I1T3; M4WYH4; E0Z2G0; Q2QL42; A5JSA3; D2X6C9; U3PXH9; Q0GK30; A0A1P8DSE3; R9XUL8; E0Z2G8; A0A0E3Z7K2	1	745.424	6	H	H	H	H	NF	H	H	1.47	1	745.424	-0.8	24.676
	H	LQLQPFPQPQLPY		20	250	73	A0A1P8DSI8; I3RXY0; R9XST5; I3RXV8; G9I1S5; I3RXY2; Q2QL52; A0A291I1T3; M4WYH4; E0Z2G0; Q2QL42; D2X6C9; U3PXH9; Q0GK30; A0A1P8DSE3; R9XUL8; A0A1P8DT67; A0A0E3UQX9; E0Z2G8; A0A0E3Z7K2	4	1568.85	13	H	H	H	H	H	H	H	3.49	2	784.927	-0.42	33.5583
	H	QQILQQQLIPCRDVVL	1xCarbamidomethyl [C11]	30	250	4	A0A2R2Y432; A0A0E3Z552; Q2QL54; G9I1R6; U3PUB1; G9I1R5; I3RXY0; R9XST5; I3RXV8; A0A1P8DTB0; A0A0E3URC2; I3RXY2; Q2QL52; A7LHC5; A0A291I1T3; M4WYH4; E0Z2G0; Q2QL42; A5JSA3; H8Y0E6; U3PXH9; M4WER7; R9XUL8; I0IT53; I0IT57; X2L2G3; I3RXW9; E0Z2G8; I0IT59; G9I1R9	2	1951.08	16	NF	H	H	NF	NF	H	NF	1.76	2	976.043	-0.35	26.5051
	H	QQPQQQYPSGQGSF		35	255	19	H8Y0D2; U3PUB1; I3RXY0; R9XST5; B5AH62; M4WH49; I3RXV8; G9I1S5; A0A1P8DSN6; B8XU29; I3RXY2; Q2QL52; A0A1P8DSH1; A8VZI4; A7LHC5; A0A2R2Y404; A0A291I1T3; M4WYH4; Q2QL42; A5JSA3; R9XSV1; F5A7H0; H8Y0E6; H8Y0G8; U3PXH9; A7LHB8; I3RXX8; X2L2G3; I3RXW9; Q2QL55; H8Y0E3; E0Z2G8; Q2QL53; H8Y0E7; G9I1R9	1	1579.71	14	H	H	H	H	H	H	H	1.81	2	790.36	-1.17	12.3516
	H	QQPQQQYPSGQGSFQPSQQNPQAQGSVQPQQLPQFEEIRNL	1xDeamidated [Q/N]	24	212	10	A0A1K0ITF9; U3PUB1; I3RXY0; M4WH49; I3RXV8; K7X0M3; A0A0E3URD6; A0A1K0K0Q0; I3RXY2; A7LHC5; A0A291I1T3; M4WYH4; A0A1K0ISY9; Q2QL42; R9XU85; R9XSV1; H8Y0E6; I3RXX8; I3RXW9; H9BQ58; E0Z2G8; Q2QL53; H8Y0E7; G9I1R9	4	4651.22	41	NF	NF	NF	NF	NF	H	NF	1.05	3	1551.08	-0.12	32.5135
	H	QQQLIPCRDVVL	1xCarbamidomethyl [C7]	33	250	98	A0A2R2Y432; A0A0E3Z552; Q2QL54; G9I1R6; U3PUB1; G9I1R5; I3RXY0; R9XST5; I3RXV8; A0A1P8DTB0; A0A0E3URC2; G9I1S5; I3RXY2; Q2QL52; A7LHC5; A0A291I1T3; M4WYH4; E0Z2G0; Q2QL42; A5JSA3; H8Y0E6; U3PXH9; M4WER7; R9XUL8; I0IT53; I0IT57; X2L2G3; I3RXW9; B9VSJ1; E0Z2G8; H8Y0E7; I0IT59; G9I1R9	1	1468.79	12	H	H	H	H	H	H	H	3.19	2	734.9	-0.79	20.3889
	H	QQQLIPCRDVVL	1xGln->pyro-Glu [N-Term]; 1xCarbamidomethyl [C7]	33	250	33	A0A2R2Y432; A0A0E3Z552; Q2QL54; G9I1R6; U3PUB1; G9I1R5; I3RXY0; R9XST5; I3RXV8; A0A1P8DTB0; A0A0E3URC2; G9I1S5; I3RXY2; Q2QL52; A7LHC5; A0A291I1T3; M4WYH4; E0Z2G0; Q2QL42; A5JSA3; H8Y0E6; U3PXH9; M4WER7; R9XUL8; I0IT53; I0IT57; X2L2G3; I3RXW9; B9VSJ1; E0Z2G8; H8Y0E7; I0IT59; G9I1R9	1	1451.77	12	H	H	H	H	H	H	H	2.34	2	726.387	-1.18	28.8486
	H	RPQQPYPQPQPQY		23	250	136	A0A1P8DSI8; U3PUB1; I3RXY0; A0A1P8DT82; R9XST5; I3RXV8; Q2QL52; A7LHC5; A0A291I1T3; M4WYH4; E0Z2G0; Q2QL42; A5JSA3; D2X6C9; U3PXH9; Q0GK30; A0A1P8DSE3; R9XUL8; A0A0E3UQX9; I3RXX8; I3RXW9; A0A1P8DT27; A0A0E3Z7K2	1	1626.8	13	H	H	H	H	H	H	H	3.18	2	813.904	-1.36	8.8088
	H	VRVPVPQLQPQNPSQQQPQEQVPL		27	253	373	A0A2R2Y432; G9I1R6; I3RXY0; A0A1P8DT82; R9XST5; I3RXV8; A0A1P8DTB0; A0A0E3URC4; A0A0E3URC2; Q41533; Q2QL52; A0A1P8DSH1; A0A0E3Z5J4; A0A291I1T3; M4WYH4; E0Z2G0; Q2QL42; A5JSA3; U3PXH9; Q0GK30; I0IT53; I0IT57; I3RXW9; H8Y0E7; I0IT59; G9I1R9; A0A0E3Z7K2	1	2734.46	24	H	H	H	H	H	H	H	5.68	2	1367.74	-0.2	23.137
	H	XGQQQPFPPQQPYPQPQPF		13	259	24	A0A1P8DSI8; A0A1P8DT82; M4WFC9; I3RXV8; Q41533; A0A1P8DT06; A0A023WGB8; A0A0E3URA8; D2X6C9; A0A0K2QJD8; Q0GK30; A0A1P8DSE3; A0A1P8DSG6	2	2222.1	19	NF	H	H	NF	H	H	NF	1.6	2	1111.55	-0.59	25.7783
	H	XPPY		48	754	523	A0A2R2Y432; A0A1D6PVA1; U3PUB1; I3RXY0; R9XST5; I3RXV8; N1QY29; A0A1D6PVM1; B6SIP3; Q2QW32; A0A1D6KZ84; G9I1S5; A0A1D6HD02; C5YAM7; A0A0Q3EYP3; I3RXY2; Q8H344; A0A0E3Z5J4; A7LHC5; A0A2R2Y404; A0A291I1T3; A0A2K2CRT5; Q0IS09; M4WYH4; E0Z2G0; H8Y0D1; A5JSA3; M8D541; K7VGB7; K7VQS8; M8AS61; A0A194YQ58; U3PXH9; Q0GK30; A0A1D6GM06; R9XUL8; I0IT53; A0A1D6PVH3; I1J1J8; I0IT57; I3RXW9; B6SII5; E0Z2G8; I0I…	0	489.271	4	H	H	H	H	H	H	H	1.33	1	489.271	-0.08	9.3314
TRUE	Master Protein	P93794	Low-molecular-weight glutenin storage protein OS=Triticum aestivum OX=4565 PE=2 SV=1	85.5153	45	1290	1	1	359	41.3	8.32	H	H	H	H	H	H	H	1054.23	45
	Confidence	Sequence	Modifications	# Protein Groups	# Proteins	# PSMs	Master Protein Accessions	# Missed Cleavages	Theo. MH+ [Da]	Sequence Length	Found in Sample Group: 1_AG38Duetto	Found in Sample Group: 5_AG167PI	Found in Sample Group: S_Semola	Found in Sample Group: 4_AG77Neolatino	Found in Sample Group: 3_AG69Lloyd	Found in Sample Group: SI_SemolaIntegrale	Found in Sample Group: 2_AG33Colosseo	XCorr Sequest HT	Charge Sequest HT	m/z [Da] Sequest HT	DeltaM [ppm] Sequest HT	RT [min] Sequest HT
	H	AHGTF		21	178	41	Q38L53; G9AYK6; X2J8E3; F1C945; Q5MFH0; R9XUD0; P93794; A0A1U9XLA9; Q84NE4; F1C943; X2JAE7; A0A1D6L3W9; D0ES16; Q9XGF0; Q84U16; Q6QGW0; A0A089VKK4; Q2L990; A0A0A0QYP7; K7R468; Q38L52	0	532.251	5	H	NF	H	H	H	H	H	1.46	1	532.251	-0.49	3.0046
	H	ARSQML		49	270	7	D0F0C5; J9QEK9; D0ES12; B2LWZ2; G0YLZ2; G9AYK6; A0A2P1BXV0; B5A810; C8CCM7; Q6J6V0; R4JFH5; A0A346R8U1; R4JAP5; A9YWM3; D3U329; P93794; J9QFV1; C6K8R8; A0A287EIZ3; F5A7G7; B5A816; Q84NE4; A0A2R4Q9T1; A0A346R8U2; F6KHQ0; R4JB62; D0ES19; B5A813; F1C940; A0A0U3AIG6; Q5XXZ9; D5FPE9; Q9XGF0; A8CA05; Q3YB17; B2LWZ6; A0A346R8T9; Q84U16; T1LG74; A0A346R8T7; A0A2R4Q9V4; A0A346R8T6; A0A089VKK4; Q2L990; A0A…	0	705.371	6	H	NF	H	H	H	H	H	1.23	1	705.37	-1.74	3.2777
	H	GQCVSQPQQQL	1xCarbamidomethyl [C3]	25	134	7	Q38L53; G9AYK6; X2J8E3; F1C945; R9XV91; Q5MFH0; Q38L54; R9XUD0; P93794; A0A1U9XLA9; Q84NE4; F1C943; A0A1G4P206; Q2PQJ6; A0A346R8U2; X2JAE7; D0ES19; D0ES20; R4JB44; Q6QGW0; A2IBV2; Q2L990; K7R468; B2LX00; Q38L52	0	1272.6	11	H	NF	NF	NF	NF	H	H	1.96	2	636.803	-0.45	7.4146
	H	GQCVSQPQQQLQQQL	1xCarbamidomethyl [C3]	24	131	3	Q38L53; G9AYK6; X2J8E3; F1C945; R9XV91; Q5MFH0; Q38L54; R9XUD0; P93794; A0A1U9XLA9; Q84NE4; A0A1G4P206; Q2PQJ6; A0A346R8U2; X2JAE7; D0ES19; D0ES20; R4JB44; Q6QGW0; A2IBV2; Q2L990; K7R468; B2LX00; Q38L52	1	1769.86	15	H	NF	NF	NF	NF	NF	NF	1.69	2	885.433	-0.34	15.8372
	H	GQQPQQQQL		29	250	39	D0F0C5; K7WV80; A0A3G3C4J5; A0A165R8I1; D0ES12; R9XVA5; A0A0A0R2J7; G9AYK6; X2J8E3; R4JFH5; P93794; Q84NE4; R4JDM1; Q5MFK8; Q2PQJ6; A0A346R8U2; D0ES19; F1C940; Q9XGF0; Q3YB17; Q5MFH4; T1LG74; A0A346R8T7; A0A2R4Q9V4; A0A089VKK4; Q2L990; A0A0A0QYP7; B8XU51; B2LX00	0	1054.53	9	H	H	H	H	H	H	H	2.05	1	1054.53	-0.47	3.9132
	H	GVGIGVGVY		17	100	18	Q38L53; A0A0A0R2J7; R9XV91; Q670S2; Q5MFH0; Q38L54; P93794; A0A1U9XLA9; Q84NE4; A0A1G4P206; Q2PQJ6; Q6QGW0; A0A089VKK4; Q2L990; A0A0A0QYP7; K7R468; Q38L52	0	820.456	9	H	NF	NF	H	NF	H	H	1.71	1	820.455	-1.38	21.6236
	H	LQPHQLAQL		53	256	324	D0F0C5; K7WV80; A9YRN9; C6K8R4; A0A287EFH8; D0ES12; B2LWZ2; G0YLZ2; G9AYK6; A0A2P1BXV0; Q670S2; B5A810; C8CCM7; Q6J6V0; R4JAP5; A9YWM3; D3U329; P93794; J9QFV1; C6K8R8; A0A287EIZ3; F5A7G7; B5A816; Q84NE4; A0A2R4Q9T1; A0A346R8U2; F6KHQ0; Q40026; R4JB62; Q84U17; B5A813; F1C940; A0A0U3AIG6; Q5XXZ9; C8CCM8; D5FPE9; Q9XGF0; A0A287EFG2; A8CA05; Q3YB17; B2LWZ6; A0A346R8T9; Q84U16; A0A346R8T7; A0A2R4Q9V4;…	2	1047.59	9	H	H	H	H	H	H	H	2.76	2	524.301	1.03	10.8766
	H	LQQQCIPVAM	1xCarbamidomethyl [C5]	28	177	32	Q38L53; I3QPH4; A0A0A0R2J7; G9AYK6; X2J8E3; F1C945; R9XV91; Q5MFH0; Q38L54; R4JFH5; R9XUD0; R9YTM4; P93794; A0A1U9XLA9; C6KI71; Q84NE4; F1C943; Q2PQJ6; X2JAE7; D0ES16; R4JB44; Q6QGW0; T1LG74; A0A346R8T7; A0A089VKK4; K7R468; V9P6N2; Q38L52	4	1187.59	10	H	H	H	H	H	H	H	2.03	2	594.299	-0.94	18.9972
	H	QPHQLAQL		53	256	14	D0F0C5; K7WV80; A9YRN9; C6K8R4; A0A287EFH8; D0ES12; B2LWZ2; G0YLZ2; G9AYK6; A0A2P1BXV0; Q670S2; B5A810; C8CCM7; Q6J6V0; R4JAP5; A9YWM3; D3U329; P93794; J9QFV1; C6K8R8; A0A287EIZ3; F5A7G7; B5A816; Q84NE4; A0A2R4Q9T1; A0A346R8U2; F6KHQ0; Q40026; R4JB62; Q84U17; B5A813; F1C940; A0A0U3AIG6; Q5XXZ9; C8CCM8; D5FPE9; Q9XGF0; A0A287EFG2; A8CA05; Q3YB17; B2LWZ6; A0A346R8T9; Q84U16; A0A346R8T7; A0A2R4Q9V4;…	1	934.51	8	H	NF	H	H	H	H	H	1.53	2	467.759	0.32	5.8896
	H	QQLNPCKVF	1xCarbamidomethyl [C6]	46	251	287	D0F0C5; K7WV80; N1R0S5; K7WV72; G0YLZ2; G9AYK6; A0A2P1BXV0; I3QPG3; A0A346R8U0; Q6J6V0; R4JFH5; A0A346R8U1; R4JAP5; Q6J6U9; A0A2R4Q9T7; D3U329; R4JFK3; P93794; C6K8R8; A0A287EIZ3; B5A816; Q84NE4; I3QPH1; A0A2R4Q9T1; A0A346R8U2; Q40026; R4JB62; A0A0U3AIG6; D7RFI1; R4JD66; A0A2R4Q9U1; A0A2R4Q9S8; Q9XGF0; A8CA05; Q3YB17; B2LWZ6; A0A346R8T7; A0A2R4Q9V4; A0A346R8T6; A0A089VKK4; A8IEC6; A0A2R4Q9S5; B2L…	1	1133.58	9	H	H	H	H	H	H	H	2.56	2	567.292	0.33	14.0594
	H	QQLNPCKVF	1xGln->pyro-Glu [N-Term]; 1xCarbamidomethyl [C6]	46	250	108	D0F0C5; K7WV80; N1R0S5; K7WV72; G0YLZ2; G9AYK6; A0A2P1BXV0; I3QPG3; A0A346R8U0; Q6J6V0; R4JFH5; A0A346R8U1; R4JAP5; Q6J6U9; A0A2R4Q9T7; D3U329; R4JFK3; P93794; C6K8R8; A0A287EIZ3; B5A816; Q84NE4; I3QPH1; A0A2R4Q9T1; A0A346R8U2; Q40026; R4JB62; A0A0U3AIG6; D7RFI1; R4JD66; A0A2R4Q9U1; A0A2R4Q9S8; Q9XGF0; A8CA05; Q3YB17; B2LWZ6; A0A346R8T7; A0A2R4Q9V4; A0A346R8T6; A0A089VKK4; A8IEC6; A0A2R4Q9S5; B2L…	1	1116.55	9	H	H	H	H	H	H	H	1.47	1	1116.55	0.02	23.8566
	H	QQQCCQQL	2xCarbamidomethyl [C4; C5]	66	374	29	D0F0C5; M7ZW11; K7WV80; N1R0S5; B6UKM2; C6K8R4; A0A287EFH8; D0ES12; Q84M19; E5FF15; W8E194; A0A0N7A5G3; I3QPG3; A0A0K2GSM3; W8E1A2; K7WZA8; P06471; Q6J6V0; R4JFH5; F5A7G9; R4JAP5; H8Y0E0; Q6J6U9; D3U329; A0A024A3B7; R4JFK3; P93794; E3UTY1; Q0PIV6; W8E6H6; A0A287EIZ3; A0A0K2GRS0; H8Y0M0; A0A0N7A547; I3QPH1; A0A2R4Q9T1; C5MQZ6; Q40026; A0A0N7A503; B6UKR2; B6UKQ9; W8E6G7; E5FF35; K7XED4; A0A0N7A522;…	0	1092.46	8	H	H	H	H	H	H	H	1.53	1	1092.45	-1.04	3.8792
	H	QQQLGQQPQQQQL	1xGln->pyro-Glu [N-Term]	26	166	3	Q38L53; A0A0A0R2J7; G9AYK6; X2J8E3; F1C945; R9XV91; Q5MFH0; R9XUD0; P93794; A0A1U9XLA9; Q84NE4; A0A1G4P206; Q2PQJ6; A0A346R8U2; X2JAE7; D0ES19; D0ES20; D0ES16; R4JB44; Q6QGW0; A2IBV2; A0A089VKK4; Q2L990; A0A0A0QYP7; B2LX00; Q38L52	1	1534.76	13	H	NF	NF	NF	NF	NF	H	1.21	2	767.885	0.84	18.0764
	H	QQQLGQQPQQQQL		26	166	23	Q38L53; A0A0A0R2J7; G9AYK6; X2J8E3; F1C945; R9XV91; Q5MFH0; R9XUD0; P93794; A0A1U9XLA9; Q84NE4; A0A1G4P206; Q2PQJ6; A0A346R8U2; X2JAE7; D0ES19; D0ES20; D0ES16; R4JB44; Q6QGW0; A2IBV2; A0A089VKK4; Q2L990; A0A0A0QYP7; B2LX00; Q38L52	1	1551.79	13	H	H	H	H	H	H	H	2.97	2	776.396	-1.49	9.8089
	H	QQQQPQQL	1xGln->pyro-Glu [N-Term]	15	118	3	Q38L53; A0A0A0R2J7; X2J8E3; R9XV91; Q38L54; R9XUD0; P93794; A0A1G4P206; Q2PQJ6; X2JAE7; R4JB44; A0A089VKK4; Q2L990; A0A0A0QYP7; K7R468	0	980.48	8	H	NF	NF	NF	NF	NF	H	1.28	1	980.479	-1.09	11.6668
	H	QQQQPQQL		19	159	18	Q38L53; A0A0A0R2J7; X2J8E3; R9XV91; Q38L54; R9XUD0; P93794; A0A1G4P206; A0A0N9LF97; Q2PQJ6; X2JAE7; R4JB44; A2IBV2; T1LG74; A0A089VKK4; Q2L990; A0A0A0QYP7; K7R468; A0A068F9M3	0	997.506	8	H	NF	NF	NF	H	H	H	2.21	1	997.505	-1.13	4.0839
	H	QQQQPQQLGQCVSQPQQQLQQQLGQQPQQQQL	1xCarbamidomethyl [C11]	11	73	20	Q38L53; X2J8E3; R9XV91; R9XUD0; P93794; A0A1G4P206; Q2PQJ6; X2JAE7; R4JB44; A2IBV2; Q2L990	3	3783.86	32	H	NF	H	NF	NF	H	H	5.18	3	1261.96	0.5	22.8548
	H	QQQQQQQQQQQQGQSIIQY		3	30	5	P93794; A0A1U9XLA9; X2JAE7	0	2345.12	19	H	NF	NF	NF	NF	H	H	2.74	2	1173.07	0.09	14.9973
	H	SIILQQQQQQQQQQQQGQSIIQY		3	30	23	P93794; A0A1U9XLA9; X2JAE7	1	2771.41	23	H	NF	NF	NF	NF	H	H	3.69	2	1386.21	1.21	23.7972
	H	SQQPPISQQQQPPF		28	161	10	A0A0A0R2J7; G9AYK6; X2J8E3; F1C945; R9XV91; Q5MFH0; Q38L54; R4JFH5; R9XUD0; R9YTM4; P93794; A0A0A0R2I8; A0A1U9XLA9; C6KI71; Q84NE4; F1C943; A0A1G4P206; Q2PQJ6; X2JAE7; D0ES16; R4JB44; Q6QGW0; T1LG74; A0A089VKK4; A0A0A0QYP7; K7R468; V9P6N2; Q38L52	0	1609.8	14	H	NF	NF	H	NF	H	H	1.32	2	805.401	-0.74	17.0117
	H	SQQQQIPVIHPSVL		28	173	108	Q38L53; A0A0A0R2J7; G9AYK6; X2J8E3; F1C945; R9XV91; Q5MFH0; Q38L54; R4JFH5; R9XUD0; R9YTM4; P93794; A0A1U9XLA9; Q84NE4; F1C943; A0A1G4P206; X2JAE7; D0ES19; D0ES20; D0ES16; R4JB44; Q6QGW0; T1LG74; A0A089VKK4; Q2L990; A0A0A0QYP7; K7R468; V9P6N2	0	1573.87	14	H	H	H	H	H	H	H	3.7	2	787.438	-0.3	20.1699
	H	SQQQQPPF		42	254	83	N1R0S5; A0A165R8I1; A9YRN9; B2LWZ2; A0A0A0R2J7; G9AYK6; A0A2P1BXV0; B5A810; C8CCM7; Q6J6V0; R4JFH5; Q5XXZ7; A9YWM3; Q6J6U9; A0A2R4Q9T7; D3U329; P93794; A0A0A0R2I8; B5A816; Q84NE4; A0A2R4Q9T1; Q2PQJ6; D0ES19; B5A813; A0A0U3AIG6; C8CCM8; D5FPE9; A0A2R4Q9U1; Q9XGF0; A8CA05; B2LWZ6; A0A346R8T9; Q84U16; T1LG74; A0A346R8T7; A0A346R8T6; A0A089VKK4; Q2L990; A0A0A0QYP7; A0A2R4Q9S5; B8XU51; X2JC88	0	959.458	8	H	H	H	H	H	H	H	2.1	2	480.233	-0.32	10.2887
	H	SQQQQPPFSQQQQPPF		49	266	54	A0A165R8I1; D3UAL8; B2LWZ2; R9XVA5; A0A0A0R2J7; G9AYK6; X2J8E3; F1C945; R9XV91; Q5MFH0; D5FPE3; B5A810; Q38L54; R4JFH5; A2IBV5; R9XUD0; P93794; A0A0A0R2I8; A0A1U9XLA9; C6KI71; Q8W3W8; Q84NE4; F1C943; A0A1G4P206; Q2PQJ6; X2JAE7; D0ES19; A0A024A269; Q8W3X4; D0ES20; D0ES16; R4JB44; Q9XGF0; A7XDG0; B2LWZ6; Q84U16; Q6QGW0; A0A068F8R5; T1LG74; A0A346R8T6; A0A089VKK4; A0A0A0QYP7; K7R468; B8XU51; V9P6N2;…	1	1899.9	16	H	H	H	H	H	H	H	4	2	950.452	-0.53	20.9553
	H	SQQQQPPFSQQQQQPPFAQQQQPPF	4xDeamidated [Q]	1	1	6	P93794	2	2956.34	25	NF	NF	NF	NF	NF	H	NF	1.1	3	986.123	5.66	16.7548
	H	SQQQQPPY		25	148	10	A0A0A0R2J7; G9AYK6; X2J8E3; F1C945; R9XV91; Q5MFH0; Q38L54; R9XUD0; P93794; A0A0A0R2I8; A0A1U9XLA9; Q84NE4; F1C943; A0A1G4P206; Q2PQJ6; D0ES19; D0ES20; D0ES16; R4JB44; Q6QGW0; A0A089VKK4; Q2L990; A0A0A0QYP7; B8XU51; Q38L52	0	975.453	8	H	H	H	H	H	NF	H	1.11	1	975.453	-0.41	4.4971
	H	SQQQQPQFSQQQQPPY		14	93	9	A0A0A0R2J7; G9AYK6; X2J8E3; Q5MFH0; P93794; A0A0A0R2I8; A0A1U9XLA9; Q84NE4; D0ES16; R4JB44; Q6QGW0; A0A089VKK4; A0A0A0QYP7; Q38L52	1	1946.9	16	NF	H	H	H	H	NF	NF	1.54	2	973.953	-0.33	13.8286
TRUE	Master Protein	D5FPE3	Low-molecular-weight glutenin subunit OS=Triticum dicoccon OX=49225 GN=GluB3-3 PE=4 SV=1	63.2653	41	1907	8	1	392	44.6	8.34	H	H	H	H	H	H	H	1050.51	41
	Confidence	Sequence	Modifications	# Protein Groups	# Proteins	# PSMs	Master Protein Accessions	# Missed Cleavages	Theo. MH+ [Da]	Sequence Length	Found in Sample Group: 1_AG38Duetto	Found in Sample Group: 5_AG167PI	Found in Sample Group: S_Semola	Found in Sample Group: 4_AG77Neolatino	Found in Sample Group: 3_AG69Lloyd	Found in Sample Group: SI_SemolaIntegrale	Found in Sample Group: 2_AG33Colosseo	XCorr Sequest HT	Charge Sequest HT	m/z [Da] Sequest HT	DeltaM [ppm] Sequest HT	RT [min] Sequest HT
	H	LQQQCSPVAMPQSL	1xCarbamidomethyl [C5]	33	198	8	R9XVA5; A2IBK1; Q8W3X5; A0A2P1BXV0; D5FPE3; C8CCM7; Q6J6V0; A2IBV5; A9YWM3; D5FPF1; D3U329; V9P785; F8SGM9; Q8W3W8; R4JDM1; A0A2R4Q9T1; K0I5W1; R4JB62; D5FPF3; A0A0U3AGE0; Q41552; Q8W3X4; C8CCM8; A2IBJ9; A8CA05; F8SGM7; D5FPF4; Q68VI0; F8SGN9; Q8W3X0; B2Y2R6; B8Y0L6; A0A0U3ATU4	1	1586.77	14	NF	NF	H	H	H	H	H	1.9	2	793.886	-1	21.583
	H	PPFSQQLPPFSQQQQPVLPQQPPF	2xDeamidated [Q12; Q13]	7	31	5	D3UAL8; R9XVA5; D5FPE3; Q8W3X4; A7XDG0; Q8W3X0; B2Y2R6	4	2762.38	24	NF	NF	NF	H	H	NF	H	1.37	3	921.466	0.9	27.5927
	H	PPFSQQQQPPFSQQQQPVLPQQPSFSQQQL		8	32	15	D3UAL8; R9XVA5; D5FPE3; A2IBV5; Q8W3X4; Q9XGF0; Q8W3X0; B2Y2R6	4	3477.72	30	H	H	NF	H	H	H	H	1.66	3	1159.91	0.07	28.8574
	H	PPFSQQQQPPFSQQQQPVLPQQPSFSQQQLPPF	2xDeamidated [Q]	8	32	14	D3UAL8; R9XVA5; D5FPE3; A2IBV5; Q8W3X4; Q9XGF0; Q8W3X0; B2Y2R6	5	3820.86	33	H	NF	NF	H	H	NF	NF	1.91	3	1274.3	2.62	28.2599
	H	PQQPPFSQQQQQQILPQQPPF	3xDeamidated [Q]	1	3	20	D5FPE3	2	2492.21	21	NF	H	H	NF	NF	H	NF	1.32	2	1246.61	0.41	23.0094
	H	QMENSHIPGLERPSQQQPLPPQQTL	1xGln->pyro-Glu [N-Term]; 1xDeamidated [N/Q]	10	46	29	R9XVA5; D5FPE3; A2IBV5; Q8W3W8; K0I5W1; Q8W3X4; A7XDG0; Q0Q2J1; Q8W3X0; B2Y2R6	4	2837.39	25	H	NF	H	NF	H	H	NF	1.95	3	946.469	0.94	24.0259
	H	QQQIPF	1xGln->pyro-Glu [N-Term]	20	115	122	A0A1D6PVA1; D3UAL8; A0A1D6PVM1; Q670S2; Q84U12; D5FPE3; A2IBV5; D5FPF1; A0A024A3B7; A0A3L6F0A4; Q8W3W8; Q5XXZ9; Q8W3X4; Q9XGF0; A7XDG0; B6SII5; Q0Q2J1; Q8W3X0; B2Y2R6; A0A0U3ATU4	0	743.372	6	H	H	H	H	H	H	H	1.23	1	743.372	-1	29.9125
	H	QQQLPF		20	115	466	A0A1D6PVA1; D3UAL8; A0A1D6PVM1; Q670S2; Q84U12; D5FPE3; A2IBV5; D5FPF1; A0A024A3B7; A0A3L6F0A4; Q8W3W8; Q5XXZ9; Q8W3X4; Q9XGF0; A7XDG0; B6SII5; Q0Q2J1; Q8W3X0; B2Y2R6; A0A0U3ATU4	1	760.399	6	H	H	H	H	H	H	H	1.53	1	760.399	0.15	17.7289
	H	RTLPTMCNVNVPL	1xCarbamidomethyl [C7]	14	67	116	D0F0C5; A0A0K2GSM3; D5FPE3; R4JFH5; C6KI71; Q8W3W8; Q8W3X4; Q4G3S5; A7XDG0; A0A287EFF7; Q0Q2J1; Q8W3X0; B2Y2R6; J9QGY8	1	1514.78	13	H	NF	H	H	H	H	H	3.7	2	757.894	-0.4	21.5241
	H	RTLPTMCNVNVPL	1xOxidation [M6]; 1xCarbamidomethyl [C7]	14	67	20	D0F0C5; A0A0K2GSM3; D5FPE3; R4JFH5; C6KI71; Q8W3W8; Q8W3X4; Q4G3S5; A7XDG0; A0A287EFF7; Q0Q2J1; Q8W3X0; B2Y2R6; J9QGY8	1	1530.78	13	H	NF	NF	H	H	H	H	2.69	2	765.891	-0.9	15.9942
	H	RTLPTMCNVNVPLY	1xCarbamidomethyl [C7]	13	66	83	D0F0C5; A0A0K2GSM3; D5FPE3; R4JFH5; C6KI71; Q8W3W8; Q8W3X4; Q4G3S5; A7XDG0; Q0Q2J1; Q8W3X0; B2Y2R6; J9QGY8	2	1677.85	14	H	NF	H	H	H	H	H	3.08	2	839.426	-0.56	23.1963
	H	RTLPTMCNVNVPLY	1xOxidation [M6]; 1xCarbamidomethyl [C7]	13	66	7	D0F0C5; A0A0K2GSM3; D5FPE3; R4JFH5; C6KI71; Q8W3W8; Q8W3X4; Q4G3S5; A7XDG0; Q0Q2J1; Q8W3X0; B2Y2R6; J9QGY8	2	1693.84	14	H	NF	NF	H	H	NF	H	1.82	2	847.423	-1.01	18.2575
	H	RTTTRVPF		10	44	59	D3UAL8; D5FPE3; A2IBV5; Q8W3W8; Q8W3X4; Q9XGF0; A7XDG0; Q0Q2J1; Q8W3X0; B2Y2R6	0	977.553	8	H	H	H	H	H	H	H	1.53	2	489.28	-0.34	3.8425
	H	SIILQEQQQVQGSIQTQQQQPQQL	1xDeamidated [Q]	11	56	20	D5FPE3; A2IBV5; Q8W3W8; A0A0U3AGE0; Q8W3X4; Q9XGF0; A7XDG0; Q0Q2J1; Q8W3X0; B2Y2R6; A0A0U3ATU4	1	2779.42	24	H	NF	H	NF	NF	NF	NF	1.27	3	927.151	6.02	23.8626
	H	SIILQEQQQVQGSIQTQQQQPQQL		11	56	84	D5FPE3; A2IBV5; Q8W3W8; A0A0U3AGE0; Q8W3X4; Q9XGF0; A7XDG0; Q0Q2J1; Q8W3X0; B2Y2R6; A0A0U3ATU4	1	2778.44	24	H	H	H	H	H	H	H	5.08	2	1389.72	0.61	24.0527
	H	SQQLPPFSQQQQPVLPQQPPF		8	32	23	D3UAL8; R9XVA5; D5FPE3; Q8W3X4; Q9XGF0; A7XDG0; Q8W3X0; B2Y2R6	3	2419.24	21	H	NF	H	H	H	H	H	1.79	2	1210.12	0.12	30.5488
	H	SQQQHPVLL		1	5	27	D5FPE3	1	1049.57	9	H	NF	H	H	H	H	H	2.54	2	525.291	0.08	8.8904
	H	SQQQLPPF		14	97	16	D3UAL8; R9XVA5; D5FPE3; A2IBV5; R4JDM1; K0I5W1; A0A0U3AGE0; Q8W3X4; Q9XGF0; A7XDG0; Q0Q2J1; Q8W3X0; B2Y2R6; A0A0U3ATU4	1	944.484	8	H	NF	H	H	H	H	H	1.3	1	944.482	-1.97	19.3503
	H	SQQQLPPFSQQLPPF		10	36	54	D3UAL8; R9XVA5; D5FPE3; A2IBV5; Q8W3X4; Q9XGF0; A7XDG0; Q0Q2J1; Q8W3X0; B2Y2R6	3	1741.89	15	H	NF	H	H	H	H	H	1.95	2	871.45	1.33	32.9225
	H	SQQQLPPFSQQLPPFSQQQQPVLPQQPPF		7	31	6	D3UAL8; R9XVA5; D5FPE3; Q8W3X4; A7XDG0; Q8W3X0; B2Y2R6	5	3344.71	29	H	NF	H	H	H	H	NF	1.37	3	1115.57	0.34	36.7654
	H	SQQQLPPFSQQQQPPF		8	33	34	D3UAL8; R9XVA5; D5FPE3; A2IBV5; Q8W3X4; Q9XGF0; Q8W3X0; B2Y2R6	2	1884.92	16	H	H	H	H	H	H	H	1.97	2	942.964	-1.17	25.5109
	H	SQQQLPPFSQQQQPPFSQQQQPVLPQQPSF	1xDeamidated [Q]	8	32	4	D3UAL8; R9XVA5; D5FPE3; A2IBV5; Q8W3X4; Q9XGF0; Q8W3X0; B2Y2R6	4	3478.7	30	NF	NF	NF	NF	NF	H	NF	1.58	3	1160.25	5.33	30.7475
	H	SQQQLPPFSQQQQPPFSQQQQPVLPQQPSF		8	32	25	D3UAL8; R9XVA5; D5FPE3; A2IBV5; Q8W3X4; Q9XGF0; Q8W3X0; B2Y2R6	4	3477.72	30	H	NF	H	H	H	NF	H	2.49	3	1159.91	-0.56	30.8261
	H	SQQQQPPFSQQQQPPF		49	266	54	A0A165R8I1; D3UAL8; B2LWZ2; R9XVA5; A0A0A0R2J7; G9AYK6; X2J8E3; F1C945; R9XV91; Q5MFH0; D5FPE3; B5A810; Q38L54; R4JFH5; A2IBV5; R9XUD0; P93794; A0A0A0R2I8; A0A1U9XLA9; C6KI71; Q8W3W8; Q84NE4; F1C943; A0A1G4P206; Q2PQJ6; X2JAE7; D0ES19; A0A024A269; Q8W3X4; D0ES20; D0ES16; R4JB44; Q9XGF0; A7XDG0; B2LWZ6; Q84U16; Q6QGW0; A0A068F8R5; T1LG74; A0A346R8T6; A0A089VKK4; A0A0A0QYP7; K7R468; B8XU51; V9P6N2;…	1	1899.9	16	H	H	H	H	H	H	H	4	2	950.452	-0.53	20.9553
	H	SQQQQPPFSQQQQPPFSQQQQPVLPQQPL	3xDeamidated [Q]	1	1	51	D5FPE3	3	3374.63	29	H	NF	NF	NF	NF	H	H	2.65	3	1125.54	-5.47	20.534
	H	SQQQQPPFSQQQQPVLPQQPSF		10	38	48	D3UAL8; R9XVA5; D5FPE3; A2IBV5; Q8W3X4; Q9XGF0; A7XDG0; Q0Q2J1; Q8W3X0; B2Y2R6	2	2552.25	22	H	H	H	H	H	H	H	3.55	2	1276.63	0.92	25.5605
	H	SQQQQPPFSQQQQPVLPQQPSFSQQQLPPF		10	37	15	D3UAL8; R9XVA5; D5FPE3; A2IBV5; Q8W3X4; Q9XGF0; A7XDG0; Q0Q2J1; Q8W3X0; B2Y2R6	4	3477.72	30	H	NF	H	H	H	NF	H	1.85	3	1159.91	0.7	32.445
	H	SQQQQPVIPQQPPF		51	229	62	D0F0C5; N1R0S5; C6K8R4; D3UAL8; D0ES12; G0YLZ2; R9XVA5; A2IBK1; Q8W3X5; A0A2P1BXV0; B5TWK5; I3QPG3; Q84U12; D5FPE3; B5A810; C8CCM7; R4JAP5; D5FPF1; Q6J6U9; A0A2R4Q9T7; V9P6P6; C6K8R8; V9P769; Q8W3W8; B5A816; R9XUW0; R4JB62; D5FPF3; A0A0U3AGE0; B5A813; F1C940; Q8W3X4; A2IBJ9; R9YSZ0; F8SGQ2; A0A2R4Q9U1; Q9XGF0; A7XDG0; Q84U16; A7X9Y0; D5FPF4; A0A2R4Q9S5; F5A7G6; F8SGP8; Q68VI0; Q0Q2J1; Q8W3X0; X2J…	0	1621.83	14	H	H	H	H	H	H	H	2.91	2	811.419	-0.97	23.216
	H	SQQQQPVIPQQPSFSQQQLPPF		11	91	8	D3UAL8; R9XVA5; D5FPE3; A2IBV5; R4JDM1; Q8W3X4; Q9XGF0; A7XDG0; Q0Q2J1; Q8W3X0; B2Y2R6	2	2537.28	22	H	NF	NF	H	H	NF	H	1.27	2	1269.14	-0.84	30.7325
	H	SQQQQPVLPQQPPFSQQQQQQILPQQPPFSQQQHPVLL	2xDeamidated [Q]	1	3	8	D5FPE3	5	4430.25	38	H	NF	NF	NF	NF	NF	NF	1.26	3	1477.44	8.87	30.3091
	H	SQQQQPVLPQQPSF		12	97	58	D3UAL8; R9XVA5; D5FPE3; C8CCM7; A2IBV5; R4JDM1; Q8W3X4; Q9XGF0; A7XDG0; Q0Q2J1; Q8W3X0; B2Y2R6	1	1611.81	14	H	H	H	H	H	H	H	3.4	2	806.409	-0.6	20.9087
	H	SQQQQQQILPQQPPFSQQQHPVLL		1	3	3	D5FPE3	3	2825.47	24	H	NF	NF	NF	NF	NF	NF	2.15	3	942.494	-1.03	25.5093
	H	VHPSIL		36	208	822	I3XHQ0; D3UAL8; H9XGZ9; R9XVA5; A2IBJ7; D5FPE3; D0F0C4; C8CCM7; P06471; A2IBV5; Q0PIV6; A0A287EIZ3; Q8W3W8; R4JDM1; K0I5W1; Q40026; A0A0U3AGE0; A0A0U3AIG6; Q8W3X4; D5FPE9; Q9XGF0; A0A287EFG2; A7XDG0; I6TMW4; I6SJ22; A0A0U2JFU1; A8IEC6; A0A287EFF7; A0A0K2GRQ1; I6SW30; Q0Q2J1; Q8W3X0; A0A287EIW5; B2Y2R6; A8IEB4; A0A0U3ATU4	0	665.398	6	H	H	H	H	H	H	H	1.62	1	665.397	-0.94	7.2207
	H	VHPSILQQLNPCKVF	1xCarbamidomethyl [C12]	24	149	92	D3UAL8; R9XVA5; D5FPE3; C8CCM7; P06471; Q0PIV6; A0A287EIZ3; Q8W3W8; R4JDM1; K0I5W1; Q40026; A0A0U3AIG6; Q8W3X4; D5FPE9; Q9XGF0; A0A287EFG2; A7XDG0; I6TMW4; I6SJ22; I6SW30; Q0Q2J1; Q8W3X0; A0A287EIW5; B2Y2R6	2	1779.96	15	H	H	H	H	H	H	H	4.28	3	593.991	0.51	24.9486
	H	YRTTTRVPF		10	44	134	D3UAL8; D5FPE3; A2IBV5; Q8W3W8; Q8W3X4; Q9XGF0; A7XDG0; Q0Q2J1; Q8W3X0; B2Y2R6	2	1140.62	9	H	H	H	H	H	H	H	2.34	3	380.877	-0.39	6.8361
TRUE	Master Protein	I0IT53	Alpha/beta-gliadin OS=Triticum aestivum OX=4565 GN=Gli-2 PE=4 SV=1	71.5753	29	1378	2	1	292	33.6	7.72	H	H	H	H	H	H	H	1048.39	29
	Confidence	Sequence	Modifications	# Protein Groups	# Proteins	# PSMs	Master Protein Accessions	# Missed Cleavages	Theo. MH+ [Da]	Sequence Length	Found in Sample Group: 1_AG38Duetto	Found in Sample Group: 5_AG167PI	Found in Sample Group: S_Semola	Found in Sample Group: 4_AG77Neolatino	Found in Sample Group: 3_AG69Lloyd	Found in Sample Group: SI_SemolaIntegrale	Found in Sample Group: 2_AG33Colosseo	XCorr Sequest HT	Charge Sequest HT	m/z [Da] Sequest HT	DeltaM [ppm] Sequest HT	RT [min] Sequest HT
	H	ALQTLPAMCNVY	1xCarbamidomethyl [C9]	25	250	84	A0A0E3Z552; G9I1R6; G9I1R5; A0A1P8DT82; A0A1P8DTB0; A0A0E3URC4; G9I1S5; A0A1P8DSN6; A8VZI4; H8Y0G8; D2X6C9; M8AS61; A9YRP1; Q0GK30; A0A1P8DSE3; M4WER7; A9YRP3; I0IT53; A0A0E3UQX9; I0IT57; X2KWD8; A0A1P8DT27; I0IT59; A9Z0K0; A0A0E3Z7K2	2	1380.67	12	H	H	H	H	H	H	H	2.23	2	690.836	-0.04	26.2605
	H	CSTTIAPF	1xCarbamidomethyl [C1]	29	195	20	A0A2R2Y432; A0A142L078; G9I1R6; H8Y0G1; I0IT58; B5AH62; M4WH49; H8Y0F3; B1PDK7; A0A1P8DSN6; A0A0E3URD6; B8XU29; A0A0E3Z5J4; K4NYM6; A0A1P8DT06; A0A0K2QJ82; M8AS61; H8Y0H4; A9YRP1; A0A0K2QJD8; A0A1P8DSE3; I0IT53; I0IT57; F4YT75; A0A023WGX2; A0A1P8DTC2; E5FF17; I0IT59; A0A1P8DSB7	0	896.418	8	H	H	H	H	H	H	H	1.33	1	896.417	-1.04	19.929
	H	FQPSQQNPQAQGF		5	12	41	I0IT58; I0IT53; I0IT57; A0A023WGX2; I0IT59	1	1476.69	13	H	H	H	H	H	H	H	2.53	2	738.846	-0.78	13.8888
	H	GIMSTN		5	14	63	I0IT58; I0IT53; I0IT57; A0A023WGX2; I0IT59	0	622.286	6	H	H	H	H	H	H	H	1.82	1	622.286	-1.16	5.1001
	H	IHNVIHA		6	23	4	I0IT58; B1PDK7; A0A1P8DSN6; I0IT53; I0IT57; I0IT59	3	803.452	7	NF	H	NF	NF	NF	NF	NF	1.06	2	402.229	-1.28	3.1759
	H	IPCRDVVL	1xCarbamidomethyl [C3]	33	250	45	A0A2R2Y432; A0A0E3Z552; G9I1R6; U3PUB1; G9I1R5; I3RXY0; R9XST5; B5AH62; I3RXV8; A0A1P8DTB0; A0A0E3URC2; G9I1S5; I3RXY2; Q2QL52; A7LHC5; A0A2R2Y404; A0A291I1T3; M4WYH4; E0Z2G0; Q2QL42; A5JSA3; H8Y0E6; H8Y0H4; U3PXH9; R9XUL8; I0IT53; I0IT57; I3RXW9; B9VSJ1; E0Z2G8; H8Y0E7; I0IT59; G9I1R9	0	971.534	8	H	H	H	H	H	H	H	1.93	2	486.271	0.4	11.7739
	H	LGQQQQQFPGQQQPFPPQQPYPQPQPF	1xDeamidated [Q]	4	10	42	I0IT53; I0IT57; A0A023WGX2; I0IT59	4	3164.52	27	NF	H	H	H	NF	H	H	1.31	3	1055.52	5.89	29.9358
	H	LGQQQQQFPGQQQPFPPQQPYPQPQPF		4	10	126	I0IT53; I0IT57; A0A023WGX2; I0IT59	4	3163.54	27	H	H	H	H	H	H	H	2.91	3	1055.18	-0.58	27.9021
	H	LPQLPYPQPQPF		13	73	19	I0IT58; A0A1K0ITF9; M4WH49; A0A1P8DSN6; A0A1K0K0Q0; G9I1T5; A8VZI4; A0A2R2Y404; I0IT53; I0IT57; A0A023WGX2; Q2QL53; I0IT59	3	1424.76	12	NF	NF	H	NF	H	H	NF	2.16	2	712.882	-0.87	30.8953
	H	QILQQL	1xGln->pyro-Glu [N-Term]	36	254	26	A0A2R2Y432; A0A0A9LIL8; A0A0E3Z552; Q2QL54; A0A142L078; G9I1R6; I0IT58; A0A1K0ITF9; G9I1R5; A0A0E3URC4; A0A1P8DSN6; A0A1K0K0Q0; H8Y0G3; G9I1T5; A0A0E3Z5J4; A0A0E3UQY6; A0A2R2Y404; K4NYM6; A0A1P8DS55; A0A0K2QJ82; A0A1K0ISY9; M8AS61; Q1WA40; A0A0K2QJD8; A7LHB8; I0IT53; A0A142L083; I0IT57; X2L2G3; X2KWD8; X2KWE1; Q2QL53; I0IT59; K4PC84	1	725.419	6	NF	H	H	H	NF	H	NF	1.25	1	725.419	-0.71	36.2048
	H	QQILQQQLIPCRDVVL	1xCarbamidomethyl [C11]	30	250	4	A0A2R2Y432; A0A0E3Z552; Q2QL54; G9I1R6; U3PUB1; G9I1R5; I3RXY0; R9XST5; I3RXV8; A0A1P8DTB0; A0A0E3URC2; I3RXY2; Q2QL52; A7LHC5; A0A291I1T3; M4WYH4; E0Z2G0; Q2QL42; A5JSA3; H8Y0E6; U3PXH9; M4WER7; R9XUL8; I0IT53; I0IT57; X2L2G3; I3RXW9; E0Z2G8; I0IT59; G9I1R9	2	1951.08	16	NF	H	H	NF	NF	H	NF	1.76	2	976.043	-0.35	26.5051
	H	QQPQQQYPSGQGF		9	69	120	I0IT58; A7LHC6; A0A023WGF7; I0IT53; I0IT57; F4YT75; A0A023WGX2; I0IT59; R9XSU5	1	1492.68	13	H	H	H	H	H	H	H	3.71	2	746.844	-0.71	13.0623
	H	QQQLIPCRDVVL	1xCarbamidomethyl [C7]	33	250	98	A0A2R2Y432; A0A0E3Z552; Q2QL54; G9I1R6; U3PUB1; G9I1R5; I3RXY0; R9XST5; I3RXV8; A0A1P8DTB0; A0A0E3URC2; G9I1S5; I3RXY2; Q2QL52; A7LHC5; A0A291I1T3; M4WYH4; E0Z2G0; Q2QL42; A5JSA3; H8Y0E6; U3PXH9; M4WER7; R9XUL8; I0IT53; I0IT57; X2L2G3; I3RXW9; B9VSJ1; E0Z2G8; H8Y0E7; I0IT59; G9I1R9	1	1468.79	12	H	H	H	H	H	H	H	3.19	2	734.9	-0.79	20.3889
	H	QQQLIPCRDVVL	1xGln->pyro-Glu [N-Term]; 1xCarbamidomethyl [C7]	33	250	33	A0A2R2Y432; A0A0E3Z552; Q2QL54; G9I1R6; U3PUB1; G9I1R5; I3RXY0; R9XST5; I3RXV8; A0A1P8DTB0; A0A0E3URC2; G9I1S5; I3RXY2; Q2QL52; A7LHC5; A0A291I1T3; M4WYH4; E0Z2G0; Q2QL42; A5JSA3; H8Y0E6; U3PXH9; M4WER7; R9XUL8; I0IT53; I0IT57; X2L2G3; I3RXW9; B9VSJ1; E0Z2G8; H8Y0E7; I0IT59; G9I1R9	1	1451.77	12	H	H	H	H	H	H	H	2.34	2	726.387	-1.18	28.8486
	H	QQQQQQQQQQQQQIL		3	24	22	A0A142L078; A0A142L072; Q5JJP6; M4WER7; I0IT53	0	1909.95	15	H	H	H	H	H	H	H	2.8	2	955.476	-1.43	9.4072
	H	QTLPAMCNVY	1xCarbamidomethyl [C7]	27	251	5	A0A0E3Z552; G9I1R6; G9I1R5; A0A1P8DT82; A0A1P8DTB0; A0A0E3URC4; G9I1S5; A0A1P8DSN6; A0A1P8DSH1; A8VZI4; A0A1P8DSY8; H8Y0G8; D2X6C9; M8AS61; A9YRP1; Q0GK30; A0A1P8DSE3; M4WER7; A9YRP3; I0IT53; A0A0E3UQX9; I0IT57; X2KWD8; A0A1P8DT27; I0IT59; A9Z0K0; A0A0E3Z7K2	1	1196.54	10	NF	H	H	H	NF	H	NF	1.45	2	598.775	-1	21.3197
	H	VRVPVPQLQPQNPSQQQPQEQVPL		27	253	373	A0A2R2Y432; G9I1R6; I3RXY0; A0A1P8DT82; R9XST5; I3RXV8; A0A1P8DTB0; A0A0E3URC4; A0A0E3URC2; Q41533; Q2QL52; A0A1P8DSH1; A0A0E3Z5J4; A0A291I1T3; M4WYH4; E0Z2G0; Q2QL42; A5JSA3; U3PXH9; Q0GK30; I0IT53; I0IT57; I3RXW9; H8Y0E7; I0IT59; G9I1R9; A0A0E3Z7K2	1	2734.46	24	H	H	H	H	H	H	H	5.68	2	1367.74	-0.2	23.137
	H	XPPY		48	754	523	A0A2R2Y432; A0A1D6PVA1; U3PUB1; I3RXY0; R9XST5; I3RXV8; N1QY29; A0A1D6PVM1; B6SIP3; Q2QW32; A0A1D6KZ84; G9I1S5; A0A1D6HD02; C5YAM7; A0A0Q3EYP3; I3RXY2; Q8H344; A0A0E3Z5J4; A7LHC5; A0A2R2Y404; A0A291I1T3; A0A2K2CRT5; Q0IS09; M4WYH4; E0Z2G0; H8Y0D1; A5JSA3; M8D541; K7VGB7; K7VQS8; M8AS61; A0A194YQ58; U3PXH9; Q0GK30; A0A1D6GM06; R9XUL8; I0IT53; A0A1D6PVH3; I1J1J8; I0IT57; I3RXW9; B6SII5; E0Z2G8; I0I…	0	489.271	4	H	H	H	H	H	H	H	1.33	1	489.271	-0.08	9.3314
TRUE	Master Protein	A0A1P8DT06	Alpha-gliadin storage protein (Fragment) OS=Triticum spelta OX=58933 PE=2 SV=1	44.3299	17	687	3	1	291	33.5	7.05	H	H	H	H	H	H	H	994.58	17
	Confidence	Sequence	Modifications	# Protein Groups	# Proteins	# PSMs	Master Protein Accessions	# Missed Cleavages	Theo. MH+ [Da]	Sequence Length	Found in Sample Group: 1_AG38Duetto	Found in Sample Group: 5_AG167PI	Found in Sample Group: S_Semola	Found in Sample Group: 4_AG77Neolatino	Found in Sample Group: 3_AG69Lloyd	Found in Sample Group: SI_SemolaIntegrale	Found in Sample Group: 2_AG33Colosseo	XCorr Sequest HT	Charge Sequest HT	m/z [Da] Sequest HT	DeltaM [ppm] Sequest HT	RT [min] Sequest HT
	H	CCQHLW	2xCarbamidomethyl [C1; C2]	18	250	86	A0A1P8DSI8; Q2QL61; A0A0E3UQX3; A0A1P8DT82; M4WFC9; M4WEQ6; H9NAK8; A0A1P8DSH1; A0A1P8DT06; A0A0E3Z5X0; D2X6C9; Q0GK30; A0A1P8DSE3; A0A1P8DSE0; A0A0E3UQX9; A0A1P8DSG6; A0A1P8DT27; A0A0E3Z7K2	1	903.36	6	H	H	H	H	H	H	H	2.2	2	452.184	0.17	9.5908
	H	CSTTIAPF	1xCarbamidomethyl [C1]	29	195	20	A0A2R2Y432; A0A142L078; G9I1R6; H8Y0G1; I0IT58; B5AH62; M4WH49; H8Y0F3; B1PDK7; A0A1P8DSN6; A0A0E3URD6; B8XU29; A0A0E3Z5J4; K4NYM6; A0A1P8DT06; A0A0K2QJ82; M8AS61; H8Y0H4; A9YRP1; A0A0K2QJD8; A0A1P8DSE3; I0IT53; I0IT57; F4YT75; A0A023WGX2; A0A1P8DTC2; E5FF17; I0IT59; A0A1P8DSB7	0	896.418	8	H	H	H	H	H	H	H	1.33	1	896.417	-1.04	19.929
	H	HQQQKQQQQPSSQVSF		15	195	16	A0A1P8DSI8; A0A1P8DT82; Q9M4L8; Q41533; M4WEQ6; H9NAK8; I0CCD0; A0A1P8DT06; A0A023WGB8; A0A0E3Z5X0; Q0GK30; A0A1P8DSE0; R9XU77; A0A1P8DT27; A0A0E3Z5C7	0	1912.93	16	NF	H	H	H	H	H	H	2.1	2	956.964	-2.52	3.4526
	H	IGQQQPFPPQQPYPQPQPFPSQQPY		14	259	699	A0A1P8DSI8; A0A1P8DT82; M4WFC9; I3RXV8; Q41533; A0A1P8DT06; A0A023WGB8; A0A0E3URA8; D2X6C9; A0A0K2QJD8; Q0GK30; A0A1P8DSE3; A0A1P8DSG6; R9XU77	3	2922.42	25	H	H	H	H	H	H	H	4.46	2	1461.71	-0.59	26.6583
	H	LGQQQPFPPQQPY		14	259	9	A0A1P8DSI8; A0A1P8DT82; M4WFC9; I3RXV8; Q41533; M4WEQ6; H9NAK8; A0A1P8DT06; A0A023WGB8; D2X6C9; Q0GK30; A0A1P8DSE3; A0A1P8DSG6; A0A0E3Z7K2	2	1527.76	13	NF	NF	H	NF	H	NF	NF	1.04	2	764.38	-3.74	17.7657
	H	QQYPL		19	265	70	A0A1P8DSI8; A0A0E3UQX3; A0A1P8DT82; Q9M4L8; Q41533; M4WEQ6; H9NAK8; I0CCD0; A0A1P8DT06; H8Y0D1; A0A023WGB8; A0A0E3Z5X0; A0A0N7A547; Q0GK30; A0A1P8DSE0; A0A0E3UR88; A0A0D9XG85; R9XU77; A0A1P8DT27	1	648.335	5	H	H	H	H	H	H	H	1.28	1	648.334	-1.52	11.483
	H	QQYPLGQGSF		17	234	30	A0A1P8DSI8; A0A0E3UQX3; A0A1P8DT82; Q9M4L8; Q41533; M4WEQ6; H9NAK8; I0CCD0; A0A1P8DT06; H8Y0D1; A0A023WGB8; A0A0E3Z5X0; Q0GK30; A0A1P8DSE0; A0A0E3UR88; R9XU77; A0A1P8DT27	2	1124.54	10	H	H	H	H	H	H	H	2.19	1	1124.54	-1.4	20.3788
	H	SQPQPF		16	253	23	A0A1P8DSI8; Q2QL61; A0A1P8DT82; M4WFC9; Q41533; M4WEQ6; H9NAK8; A0A1P8DT06; A0A023WGB8; A0A0E3Z5X0; D2X6C9; Q0GK30; A0A1P8DSE3; A0A0E3UQX9; A0A1P8DT27; A0A0E3Z7K2	0	703.341	6	H	H	H	H	H	H	H	1.67	1	703.341	-0.21	9.3433
	H	XGQQQPFPPQQPYPQPQPF		13	259	24	A0A1P8DSI8; A0A1P8DT82; M4WFC9; I3RXV8; Q41533; A0A1P8DT06; A0A023WGB8; A0A0E3URA8; D2X6C9; A0A0K2QJD8; Q0GK30; A0A1P8DSE3; A0A1P8DSG6	2	2222.1	19	NF	H	H	NF	H	H	NF	1.6	2	1111.55	-0.59	25.7783
TRUE	Master Protein	I6QQ39	Globulin-3A OS=Triticum aestivum OX=4565 GN=Glo-3A PE=2 SV=1	39.7959	35	1025	11	1	588	66.3	8.27	H	H	H	H	H	H	H	972.26	35
	Confidence	Sequence	Modifications	# Protein Groups	# Proteins	# PSMs	Master Protein Accessions	# Missed Cleavages	Theo. MH+ [Da]	Sequence Length	Found in Sample Group: 1_AG38Duetto	Found in Sample Group: 5_AG167PI	Found in Sample Group: S_Semola	Found in Sample Group: 4_AG77Neolatino	Found in Sample Group: 3_AG69Lloyd	Found in Sample Group: SI_SemolaIntegrale	Found in Sample Group: 2_AG33Colosseo	XCorr Sequest HT	Charge Sequest HT	m/z [Da] Sequest HT	DeltaM [ppm] Sequest HT	RT [min] Sequest HT
	H	AFGRPAREVQEVF		1	1	84	I6QQ39	1	1505.79	13	H	H	H	H	H	H	H	2.7	3	502.6	-0.8	14.9931
	H	AGRNNVIAKLDDPAQEL		1	4	30	I6QQ39	1	1823.96	17	H	H	H	H	H	H	H	2.51	3	608.658	-0.52	17.6342
	H	EINAERNERVW		3	15	111	I6QQ39; A0A3B6ILV9; A0A3B6IJ76	0	1415.7	11	H	H	H	H	H	H	H	2.82	3	472.572	-0.96	7.7153
	H	FGRPAREVQEVF		1	1	16	I6QQ39	4	1434.75	12	NF	H	H	H	H	H	H	1.67	3	478.921	-0.03	12.4678
	H	GRPAREVQEVF		3	15	114	I6QQ39; A0A3B6ILV9; A0A3B6IJ76	0	1287.68	11	H	H	H	H	H	H	H	2.26	3	429.9	2.97	6.0483
	H	HTISVPGKF		3	12	94	I6QQ39; A0A3B6ILV9; A0A3B6IJ76	0	985.547	9	H	H	H	H	H	H	H	2.5	2	493.277	-0.54	8.1676
	H	KLAVVL		2	28	14	I6QQ39; A0A3B6IJ76	1	642.455	6	NF	H	NF	H	H	H	H	1.35	1	642.456	2.41	13.5184
	H	KTSDERLGSLL		1	3	30	I6QQ39	2	1218.67	11	H	H	H	H	H	H	H	2.23	2	609.838	-0.48	12.6992
	H	LAGRNNVIAKLDDPAQEL		1	4	53	I6QQ39	2	1937.05	18	H	H	H	H	H	H	H	3.9	3	646.352	-1.13	18.8533
	H	RVAIMEVNPRAF		1	10	58	I6QQ39	0	1402.76	12	H	H	H	H	H	H	H	3.45	3	468.259	-0.52	17.5944
	H	RVAIMEVNPRAF	1xOxidation [M5]	1	10	20	I6QQ39	0	1418.76	12	H	H	NF	H	H	H	H	2.04	3	473.59	-0.78	17.514
	H	SAKPL		5	91	5	I6QQ39; A0A3B6ILV9; A0A0E0QVL9; A0A3B6IJ76; K3Z0S5	0	515.319	5	NF	H	NF	H	NF	NF	H	1.36	2	258.162	-2.25	2.8144
	H	SKRVL		4	55	5	A0A0E0DC09; I6QQ39; A0A3B6ILV9; A0A3B6IJ76	0	602.398	5	NF	H	NF	H	H	H	H	1.37	2	301.702	-2.12	2.9093
	H	TAALKTSDERLGSLL		1	2	51	I6QQ39	3	1574.87	15	H	H	H	H	H	H	H	3.7	3	525.629	-0.98	16.9325
	H	TVIENGEKRSY		1	11	4	I6QQ39	0	1295.66	11	NF	NF	NF	H	NF	H	NF	1.55	2	648.334	1.77	2.8938
	H	TVRQGDVIVAPAGSIMHL	1xOxidation [M16]	2	8	57	I6QQ39; A0A3B6ILV9	0	1880.01	18	H	H	H	H	H	H	H	3.77	3	627.34	-0.95	15.7962
	H	VAQGEGVLTVIENGEKRSY		1	11	49	I6QQ39	1	2049.06	19	H	H	H	H	H	H	H	5.28	3	683.691	-0.97	20.6871
	H	VAQGEGVLTVIENGEKRSY	1xDeamidated [N13]	1	11	3	I6QQ39	1	2050.05	19	NF	H	NF	H	NF	NF	NF	2.01	3	684.018	-2.23	18.1115
	H	VFGPRSF		2	9	15	I6QQ39; A0A3B6ILV9	1	809.43	7	H	H	H	H	H	H	H	1.16	2	405.218	-1.34	13.1592
	H	VKALRPFDEVSRLL		3	12	4	I6QQ39; A0A3B6ILV9; A0A3B6IJ76	3	1642.96	14	NF	H	NF	H	H	NF	H	1.38	3	548.327	2.38	23.989
	H	VVPPGHPVVEIASSRGSSNL		3	5	78	I6QQ39; A0A3B6ILV9; A0A3B6IJ76	0	2002.07	20	H	H	H	H	H	H	H	3.81	3	668.028	-1.24	13.165
	H	VVPPGHPVVEIASSRGSSNLQVVCF	1xCarbamidomethyl [C24]	3	5	15	I6QQ39; A0A3B6ILV9; A0A3B6IJ76	1	2635.37	25	H	H	NF	H	H	H	H	2.83	3	879.125	-1.86	22.6636
TRUE	Master Protein	D3UAL8	Low molecular weight glutenin subunit B3-3 (Fragment) OS=Triticum aestivum OX=4565 PE=4 SV=1	66.3768	40	1796	5	1	345	39.6	8.35	H	H	H	H	H	H	H	926.39	40
	Confidence	Sequence	Modifications	# Protein Groups	# Proteins	# PSMs	Master Protein Accessions	# Missed Cleavages	Theo. MH+ [Da]	Sequence Length	Found in Sample Group: 1_AG38Duetto	Found in Sample Group: 5_AG167PI	Found in Sample Group: S_Semola	Found in Sample Group: 4_AG77Neolatino	Found in Sample Group: 3_AG69Lloyd	Found in Sample Group: SI_SemolaIntegrale	Found in Sample Group: 2_AG33Colosseo	XCorr Sequest HT	Charge Sequest HT	m/z [Da] Sequest HT	DeltaM [ppm] Sequest HT	RT [min] Sequest HT
	H	EAIRAIVY		16	69	218	D3UAL8; B2LWZ2; B5A810; A2IBV5; Q6J6U9; Q8W3W8; Q8W3X4; Q9XGF0; A7XDG0; F6M7E1; B2LWZ6; A0A346R8T9; A0A346R8T6; Q0Q2J1; Q8W3X0; B2Y2R6	0	934.536	8	H	H	H	H	H	H	H	2.52	2	467.771	-0.08	13.5366
	H	PPFSQQLPPFSQQQQPVLPQQPPF	2xDeamidated [Q12; Q13]	7	31	5	D3UAL8; R9XVA5; D5FPE3; Q8W3X4; A7XDG0; Q8W3X0; B2Y2R6	4	2762.38	24	NF	NF	NF	H	H	NF	H	1.37	3	921.466	0.9	27.5927
	H	PPFSQQQQPPFSQQQQPVLPQQPSFSQQQL		8	32	15	D3UAL8; R9XVA5; D5FPE3; A2IBV5; Q8W3X4; Q9XGF0; Q8W3X0; B2Y2R6	4	3477.72	30	H	H	NF	H	H	H	H	1.66	3	1159.91	0.07	28.8574
	H	PPFSQQQQPPFSQQQQPVLPQQPSFSQQQLPPF	2xDeamidated [Q]	8	32	14	D3UAL8; R9XVA5; D5FPE3; A2IBV5; Q8W3X4; Q9XGF0; Q8W3X0; B2Y2R6	5	3820.86	33	H	NF	NF	H	H	NF	NF	1.91	3	1274.3	2.62	28.2599
	H	PPFSQQQQPVLPQQPPFSQQQQQPILPQQPPFSQQQQPVL	2xDeamidated [Q]	1	10	10	D3UAL8	5	4618.34	40	NF	NF	NF	NF	NF	H	NF	1.07	3	1540.1	-9.8	45.2616
	H	QQQIPF	1xGln->pyro-Glu [N-Term]	20	115	122	A0A1D6PVA1; D3UAL8; A0A1D6PVM1; Q670S2; Q84U12; D5FPE3; A2IBV5; D5FPF1; A0A024A3B7; A0A3L6F0A4; Q8W3W8; Q5XXZ9; Q8W3X4; Q9XGF0; A7XDG0; B6SII5; Q0Q2J1; Q8W3X0; B2Y2R6; A0A0U3ATU4	0	743.372	6	H	H	H	H	H	H	H	1.23	1	743.372	-1	29.9125
	H	QQQLPF		20	115	466	A0A1D6PVA1; D3UAL8; A0A1D6PVM1; Q670S2; Q84U12; D5FPE3; A2IBV5; D5FPF1; A0A024A3B7; A0A3L6F0A4; Q8W3W8; Q5XXZ9; Q8W3X4; Q9XGF0; A7XDG0; B6SII5; Q0Q2J1; Q8W3X0; B2Y2R6; A0A0U3ATU4	1	760.399	6	H	H	H	H	H	H	H	1.53	1	760.399	0.15	17.7289
	H	RTTTRVPF		10	44	59	D3UAL8; D5FPE3; A2IBV5; Q8W3W8; Q8W3X4; Q9XGF0; A7XDG0; Q0Q2J1; Q8W3X0; B2Y2R6	0	977.553	8	H	H	H	H	H	H	H	1.53	2	489.28	-0.34	3.8425
	H	SQQLPPFSQQQQPVLPQQPPF		8	32	23	D3UAL8; R9XVA5; D5FPE3; Q8W3X4; Q9XGF0; A7XDG0; Q8W3X0; B2Y2R6	3	2419.24	21	H	NF	H	H	H	H	H	1.79	2	1210.12	0.12	30.5488
	H	SQQQLPPF		14	97	16	D3UAL8; R9XVA5; D5FPE3; A2IBV5; R4JDM1; K0I5W1; A0A0U3AGE0; Q8W3X4; Q9XGF0; A7XDG0; Q0Q2J1; Q8W3X0; B2Y2R6; A0A0U3ATU4	1	944.484	8	H	NF	H	H	H	H	H	1.3	1	944.482	-1.97	19.3503
	H	SQQQLPPFSQQLPPF		10	36	54	D3UAL8; R9XVA5; D5FPE3; A2IBV5; Q8W3X4; Q9XGF0; A7XDG0; Q0Q2J1; Q8W3X0; B2Y2R6	3	1741.89	15	H	NF	H	H	H	H	H	1.95	2	871.45	1.33	32.9225
	H	SQQQLPPFSQQLPPFSQQQQPVLPQQPPF		7	31	6	D3UAL8; R9XVA5; D5FPE3; Q8W3X4; A7XDG0; Q8W3X0; B2Y2R6	5	3344.71	29	H	NF	H	H	H	H	NF	1.37	3	1115.57	0.34	36.7654
	H	SQQQLPPFSQQQQPPF		8	33	34	D3UAL8; R9XVA5; D5FPE3; A2IBV5; Q8W3X4; Q9XGF0; Q8W3X0; B2Y2R6	2	1884.92	16	H	H	H	H	H	H	H	1.97	2	942.964	-1.17	25.5109
	H	SQQQLPPFSQQQQPPFSQQQQPVLPQQPSF	1xDeamidated [Q]	8	32	4	D3UAL8; R9XVA5; D5FPE3; A2IBV5; Q8W3X4; Q9XGF0; Q8W3X0; B2Y2R6	4	3478.7	30	NF	NF	NF	NF	NF	H	NF	1.58	3	1160.25	5.33	30.7475
	H	SQQQLPPFSQQQQPPFSQQQQPVLPQQPSF		8	32	25	D3UAL8; R9XVA5; D5FPE3; A2IBV5; Q8W3X4; Q9XGF0; Q8W3X0; B2Y2R6	4	3477.72	30	H	NF	H	H	H	NF	H	2.49	3	1159.91	-0.56	30.8261
	H	SQQQQPPFSQQQQPPF		49	266	54	A0A165R8I1; D3UAL8; B2LWZ2; R9XVA5; A0A0A0R2J7; G9AYK6; X2J8E3; F1C945; R9XV91; Q5MFH0; D5FPE3; B5A810; Q38L54; R4JFH5; A2IBV5; R9XUD0; P93794; A0A0A0R2I8; A0A1U9XLA9; C6KI71; Q8W3W8; Q84NE4; F1C943; A0A1G4P206; Q2PQJ6; X2JAE7; D0ES19; A0A024A269; Q8W3X4; D0ES20; D0ES16; R4JB44; Q9XGF0; A7XDG0; B2LWZ6; Q84U16; Q6QGW0; A0A068F8R5; T1LG74; A0A346R8T6; A0A089VKK4; A0A0A0QYP7; K7R468; B8XU51; V9P6N2;…	1	1899.9	16	H	H	H	H	H	H	H	4	2	950.452	-0.53	20.9553
	H	SQQQQPPFSQQQQPVLPQQPSF		10	38	48	D3UAL8; R9XVA5; D5FPE3; A2IBV5; Q8W3X4; Q9XGF0; A7XDG0; Q0Q2J1; Q8W3X0; B2Y2R6	2	2552.25	22	H	H	H	H	H	H	H	3.55	2	1276.63	0.92	25.5605
	H	SQQQQPPFSQQQQPVLPQQPSFSQQQLPPF		10	37	15	D3UAL8; R9XVA5; D5FPE3; A2IBV5; Q8W3X4; Q9XGF0; A7XDG0; Q0Q2J1; Q8W3X0; B2Y2R6	4	3477.72	30	H	NF	H	H	H	NF	H	1.85	3	1159.91	0.7	32.445
	H	SQQQQPVIPQQPPF		51	229	62	D0F0C5; N1R0S5; C6K8R4; D3UAL8; D0ES12; G0YLZ2; R9XVA5; A2IBK1; Q8W3X5; A0A2P1BXV0; B5TWK5; I3QPG3; Q84U12; D5FPE3; B5A810; C8CCM7; R4JAP5; D5FPF1; Q6J6U9; A0A2R4Q9T7; V9P6P6; C6K8R8; V9P769; Q8W3W8; B5A816; R9XUW0; R4JB62; D5FPF3; A0A0U3AGE0; B5A813; F1C940; Q8W3X4; A2IBJ9; R9YSZ0; F8SGQ2; A0A2R4Q9U1; Q9XGF0; A7XDG0; Q84U16; A7X9Y0; D5FPF4; A0A2R4Q9S5; F5A7G6; F8SGP8; Q68VI0; Q0Q2J1; Q8W3X0; X2J…	0	1621.83	14	H	H	H	H	H	H	H	2.91	2	811.419	-0.97	23.216
	H	SQQQQPVIPQQPSFSQQQLPPF		11	91	8	D3UAL8; R9XVA5; D5FPE3; A2IBV5; R4JDM1; Q8W3X4; Q9XGF0; A7XDG0; Q0Q2J1; Q8W3X0; B2Y2R6	2	2537.28	22	H	NF	NF	H	H	NF	H	1.27	2	1269.14	-0.84	30.7325
	H	SQQQQPVLL		10	31	53	D3UAL8; B8Y444; A2IBV5; Q8W3W8; Q8W3X4; Q9XGF0; Q84U16; B9VSH9; Q8W3X0; B2Y2R6	1	1040.57	9	H	H	H	H	H	H	H	2.11	2	520.791	0.4	17.0267
	H	SQQQQPVLPQQPPFSQQQQQPILPQQPPF		1	12	4	D3UAL8	3	3366.72	29	NF	NF	NF	H	H	NF	NF	1.38	3	1122.91	-1.11	31.7132
	H	SQQQQPVLPQQPPFSQQQQQPILPQQPPF	1xDeamidated [Q]	1	12	7	D3UAL8	3	3367.71	29	NF	NF	NF	NF	NF	NF	H	1.3	3	1123.25	4.11	31.6751
	H	SQQQQPVLPQQPPFSQQQQQPILPQQPPFSQQQQPVLL		1	10	24	D3UAL8	5	4388.28	38	H	NF	H	H	H	H	H	2.71	3	1463.43	-0.01	35.0045
	H	SQQQQPVLPQQPPFSQQQQQPILPQQPPFSQQQQPVLL	1xDeamidated [Q]	1	10	19	D3UAL8	5	4389.26	38	H	H	NF	NF	NF	NF	NF	2.16	3	1463.77	5.99	34.8995
	H	SQQQQPVLPQQPSF		12	97	58	D3UAL8; R9XVA5; D5FPE3; C8CCM7; A2IBV5; R4JDM1; Q8W3X4; Q9XGF0; A7XDG0; Q0Q2J1; Q8W3X0; B2Y2R6	1	1611.81	14	H	H	H	H	H	H	H	3.4	2	806.409	-0.6	20.9087
	H	SQQQQPVLPQQPSFSQQQLPPFSQQQQPPF		7	32	5	D3UAL8; R9XVA5; A2IBV5; Q8W3X4; Q9XGF0; Q8W3X0; B2Y2R6	4	3477.72	30	H	NF	NF	H	H	NF	H	1.59	3	1159.91	0.07	31.9154
	H	SQQQQQPILPQQPPFSQQQQPVLL		2	11	52	D3UAL8; B2Y2R6	3	2785.46	24	H	H	H	H	H	H	H	3.14	2	1393.24	1.59	31.3798
	H	SQQQQQPLL		12	67	4	D3UAL8; A0A2P1BXV0; R4JAP5; V9P785; F8SGM9; R4JDM1; D5FPF3; A0A0U3AIG6; D5FPE9; F8SGM7; B2LWZ6; B2Y2R6	1	1069.56	9	NF	NF	NF	H	NF	NF	H	1.12	2	535.286	0.68	11.0239
	H	SQQQQQPLLPQQPPF		8	43	16	D3UAL8; A0A2P1BXV0; R4JAP5; F8SGM9; D5FPF3; D5FPE9; F8SGM7; B2Y2R6	2	1763.91	15	H	NF	NF	H	H	NF	H	1.92	2	882.457	-0.55	24.8687
	H	TQQQQPQQL		1	1	15	D3UAL8	0	1098.55	9	H	NF	H	H	H	NF	H	1.26	1	1098.55	-0.98	4.2377
	H	VHPSIL		36	208	822	I3XHQ0; D3UAL8; H9XGZ9; R9XVA5; A2IBJ7; D5FPE3; D0F0C4; C8CCM7; P06471; A2IBV5; Q0PIV6; A0A287EIZ3; Q8W3W8; R4JDM1; K0I5W1; Q40026; A0A0U3AGE0; A0A0U3AIG6; Q8W3X4; D5FPE9; Q9XGF0; A0A287EFG2; A7XDG0; I6TMW4; I6SJ22; A0A0U2JFU1; A8IEC6; A0A287EFF7; A0A0K2GRQ1; I6SW30; Q0Q2J1; Q8W3X0; A0A287EIW5; B2Y2R6; A8IEB4; A0A0U3ATU4	0	665.398	6	H	H	H	H	H	H	H	1.62	1	665.397	-0.94	7.2207
	H	VHPSILQQLNPCKVF	1xCarbamidomethyl [C12]	24	149	92	D3UAL8; R9XVA5; D5FPE3; C8CCM7; P06471; Q0PIV6; A0A287EIZ3; Q8W3W8; R4JDM1; K0I5W1; Q40026; A0A0U3AIG6; Q8W3X4; D5FPE9; Q9XGF0; A0A287EFG2; A7XDG0; I6TMW4; I6SJ22; I6SW30; Q0Q2J1; Q8W3X0; A0A287EIW5; B2Y2R6	2	1779.96	15	H	H	H	H	H	H	H	4.28	3	593.991	0.51	24.9486
	H	YRTTTRVPF		10	44	134	D3UAL8; D5FPE3; A2IBV5; Q8W3W8; Q8W3X4; Q9XGF0; A7XDG0; Q0Q2J1; Q8W3X0; B2Y2R6	2	1140.62	9	H	H	H	H	H	H	H	2.34	3	380.877	-0.39	6.8361
TRUE	Master Protein	D3U329	Low molecular weight glutenin subunit D3-1 OS=Aegilops tauschii OX=37682 GN=LMW-GS PE=4 SV=1	72.7536	35	1310	1	1	345	39.6	8.32	H	H	H	H	H	H	H	909.21	35
	Confidence	Sequence	Modifications	# Protein Groups	# Proteins	# PSMs	Master Protein Accessions	# Missed Cleavages	Theo. MH+ [Da]	Sequence Length	Found in Sample Group: 1_AG38Duetto	Found in Sample Group: 5_AG167PI	Found in Sample Group: S_Semola	Found in Sample Group: 4_AG77Neolatino	Found in Sample Group: 3_AG69Lloyd	Found in Sample Group: SI_SemolaIntegrale	Found in Sample Group: 2_AG33Colosseo	XCorr Sequest HT	Charge Sequest HT	m/z [Da] Sequest HT	DeltaM [ppm] Sequest HT	RT [min] Sequest HT
	H	ARSQML		49	270	7	D0F0C5; J9QEK9; D0ES12; B2LWZ2; G0YLZ2; G9AYK6; A0A2P1BXV0; B5A810; C8CCM7; Q6J6V0; R4JFH5; A0A346R8U1; R4JAP5; A9YWM3; D3U329; P93794; J9QFV1; C6K8R8; A0A287EIZ3; F5A7G7; B5A816; Q84NE4; A0A2R4Q9T1; A0A346R8U2; F6KHQ0; R4JB62; D0ES19; B5A813; F1C940; A0A0U3AIG6; Q5XXZ9; D5FPE9; Q9XGF0; A8CA05; Q3YB17; B2LWZ6; A0A346R8T9; Q84U16; T1LG74; A0A346R8T7; A0A2R4Q9V4; A0A346R8T6; A0A089VKK4; Q2L990; A0A…	0	705.371	6	H	NF	H	H	H	H	H	1.23	1	705.37	-1.74	3.2777
	H	CSVNVPVY	1xCarbamidomethyl [C1]	22	93	3	A2IBK1; Q8W3X5; A0A2P1BXV0; Q6J6V0; A0A0U3ANN8; A0A346R8U1; R4JAP5; A9YWM3; D3U329; F8SGM9; A0A2R4Q9T1; R4JB62; D5FPF3; A0A0U3AIG6; C8CCM8; A2IBJ9; D5FPE9; A8CA05; F8SGM7; D5FPF4; Q68VI0; F8SGN9	3	937.445	8	NF	NF	H	NF	H	NF	H	1.18	1	937.444	-0.8	16.9848
	H	DAIRAIIY		25	101	217	A2IBK1; Q8W3X5; A0A2P1BXV0; Q6J6V0; A0A0U3ANN8; R4JAP5; A9YWM3; D5FPF1; D3U329; V9P785; F8SGM9; A0A2R4Q9T1; R4JB62; D5FPF3; A0A0U3AIG6; Q41552; C8CCM8; A2IBJ9; D5FPE9; A8CA05; F8SGM7; D5FPF4; Q68VI0; F8SGN9; B8Y0L6	0	934.536	8	H	H	H	H	H	H	H	2.32	2	467.772	0.44	19.2101
	H	GQWPQQQQVPQGTL		22	88	15	A2IBK1; Q8W3X5; A0A2P1BXV0; Q6J6V0; A0A0U3ANN8; R4JAP5; A9YWM3; D3U329; V9P785; F8SGM9; A0A2R4Q9T1; R4JB62; D5FPF3; A0A0U3AIG6; C8CCM8; A2IBJ9; A8CA05; F8SGM7; D5FPF4; Q68VI0; F8SGN9; B8Y0L6	1	1594.8	14	H	H	H	H	H	H	H	2.49	2	797.901	-1.57	19.641
	H	GQWPQQQQVPQGTLLQPHQIAQL		20	86	3	A2IBK1; Q8W3X5; A0A2P1BXV0; Q6J6V0; A0A0U3ANN8; R4JAP5; A9YWM3; D3U329; V9P785; F8SGM9; A0A2R4Q9T1; R4JB62; D5FPF3; A0A0U3AIG6; C8CCM8; A2IBJ9; A8CA05; D5FPF4; Q68VI0; F8SGN9	3	2623.37	23	NF	NF	NF	H	H	NF	NF	1.39	3	875.128	-1.24	25.9172
	H	GVGTRVGAY		18	72	20	A2IBK1; Q8W3X5; A0A2P1BXV0; A0A0U3ANN8; R4JAP5; A9YWM3; D5FPF1; D3U329; F8SGM9; R4JB62; D5FPF3; C8CCM8; A2IBJ9; A8CA05; F8SGM7; D5FPF4; F8SGN9; B8Y0L6	0	879.468	9	H	H	H	H	H	H	H	1.63	2	440.237	-1.23	3.9266
	H	LQPHQLAQL		53	256	324	D0F0C5; K7WV80; A9YRN9; C6K8R4; A0A287EFH8; D0ES12; B2LWZ2; G0YLZ2; G9AYK6; A0A2P1BXV0; Q670S2; B5A810; C8CCM7; Q6J6V0; R4JAP5; A9YWM3; D3U329; P93794; J9QFV1; C6K8R8; A0A287EIZ3; F5A7G7; B5A816; Q84NE4; A0A2R4Q9T1; A0A346R8U2; F6KHQ0; Q40026; R4JB62; Q84U17; B5A813; F1C940; A0A0U3AIG6; Q5XXZ9; C8CCM8; D5FPE9; Q9XGF0; A0A287EFG2; A8CA05; Q3YB17; B2LWZ6; A0A346R8T9; Q84U16; A0A346R8T7; A0A2R4Q9V4;…	2	1047.59	9	H	H	H	H	H	H	H	2.76	2	524.301	1.03	10.8766
	H	LQQQCSPVAMPQSL	1xCarbamidomethyl [C5]	33	198	8	R9XVA5; A2IBK1; Q8W3X5; A0A2P1BXV0; D5FPE3; C8CCM7; Q6J6V0; A2IBV5; A9YWM3; D5FPF1; D3U329; V9P785; F8SGM9; Q8W3W8; R4JDM1; A0A2R4Q9T1; K0I5W1; R4JB62; D5FPF3; A0A0U3AGE0; Q41552; Q8W3X4; C8CCM8; A2IBJ9; A8CA05; F8SGM7; D5FPF4; Q68VI0; F8SGN9; Q8W3X0; B2Y2R6; B8Y0L6; A0A0U3ATU4	1	1586.77	14	NF	NF	H	H	H	H	H	1.9	2	793.886	-1	21.583
	H	METSHIPGLEKPSQQQPLPLQQILW	1xDeamidated [Q]	1	2	16	D3U329	4	2899.5	25	NF	NF	H	H	NF	H	NF	1.55	3	967.163	-9.43	28.5281
	H	NQPQQQQPQQSVQGVSQPQQQQKQL		20	82	21	A2IBK1; Q8W3X5; A0A2P1BXV0; Q6J6V0; A0A0U3ANN8; R4JAP5; A9YWM3; D5FPF1; D3U329; V9P785; F8SGM9; A0A2R4Q9T1; R4JB62; Q41552; C8CCM8; A2IBJ9; A8CA05; F8SGM7; F8SGN9; B8Y0L6	0	2887.44	25	H	H	H	H	H	H	H	2.26	3	963.15	-1.6	7.5568
	H	QPHQLAQL		53	256	14	D0F0C5; K7WV80; A9YRN9; C6K8R4; A0A287EFH8; D0ES12; B2LWZ2; G0YLZ2; G9AYK6; A0A2P1BXV0; Q670S2; B5A810; C8CCM7; Q6J6V0; R4JAP5; A9YWM3; D3U329; P93794; J9QFV1; C6K8R8; A0A287EIZ3; F5A7G7; B5A816; Q84NE4; A0A2R4Q9T1; A0A346R8U2; F6KHQ0; Q40026; R4JB62; Q84U17; B5A813; F1C940; A0A0U3AIG6; Q5XXZ9; C8CCM8; D5FPE9; Q9XGF0; A0A287EFG2; A8CA05; Q3YB17; B2LWZ6; A0A346R8T9; Q84U16; A0A346R8T7; A0A2R4Q9V4;…	1	934.51	8	H	NF	H	H	H	H	H	1.53	2	467.759	0.32	5.8896
	H	QQLNPCKVF	1xCarbamidomethyl [C6]	46	251	287	D0F0C5; K7WV80; N1R0S5; K7WV72; G0YLZ2; G9AYK6; A0A2P1BXV0; I3QPG3; A0A346R8U0; Q6J6V0; R4JFH5; A0A346R8U1; R4JAP5; Q6J6U9; A0A2R4Q9T7; D3U329; R4JFK3; P93794; C6K8R8; A0A287EIZ3; B5A816; Q84NE4; I3QPH1; A0A2R4Q9T1; A0A346R8U2; Q40026; R4JB62; A0A0U3AIG6; D7RFI1; R4JD66; A0A2R4Q9U1; A0A2R4Q9S8; Q9XGF0; A8CA05; Q3YB17; B2LWZ6; A0A346R8T7; A0A2R4Q9V4; A0A346R8T6; A0A089VKK4; A8IEC6; A0A2R4Q9S5; B2L…	1	1133.58	9	H	H	H	H	H	H	H	2.56	2	567.292	0.33	14.0594
	H	QQLNPCKVF	1xGln->pyro-Glu [N-Term]; 1xCarbamidomethyl [C6]	46	250	108	D0F0C5; K7WV80; N1R0S5; K7WV72; G0YLZ2; G9AYK6; A0A2P1BXV0; I3QPG3; A0A346R8U0; Q6J6V0; R4JFH5; A0A346R8U1; R4JAP5; Q6J6U9; A0A2R4Q9T7; D3U329; R4JFK3; P93794; C6K8R8; A0A287EIZ3; B5A816; Q84NE4; I3QPH1; A0A2R4Q9T1; A0A346R8U2; Q40026; R4JB62; A0A0U3AIG6; D7RFI1; R4JD66; A0A2R4Q9U1; A0A2R4Q9S8; Q9XGF0; A8CA05; Q3YB17; B2LWZ6; A0A346R8T7; A0A2R4Q9V4; A0A346R8T6; A0A089VKK4; A8IEC6; A0A2R4Q9S5; B2L…	1	1116.55	9	H	H	H	H	H	H	H	1.47	1	1116.55	0.02	23.8566
	H	QQQCCQQL	2xCarbamidomethyl [C4; C5]	66	374	29	D0F0C5; M7ZW11; K7WV80; N1R0S5; B6UKM2; C6K8R4; A0A287EFH8; D0ES12; Q84M19; E5FF15; W8E194; A0A0N7A5G3; I3QPG3; A0A0K2GSM3; W8E1A2; K7WZA8; P06471; Q6J6V0; R4JFH5; F5A7G9; R4JAP5; H8Y0E0; Q6J6U9; D3U329; A0A024A3B7; R4JFK3; P93794; E3UTY1; Q0PIV6; W8E6H6; A0A287EIZ3; A0A0K2GRS0; H8Y0M0; A0A0N7A547; I3QPH1; A0A2R4Q9T1; C5MQZ6; Q40026; A0A0N7A503; B6UKR2; B6UKQ9; W8E6G7; E5FF35; K7XED4; A0A0N7A522;…	0	1092.46	8	H	H	H	H	H	H	H	1.53	1	1092.45	-1.04	3.8792
	H	SIVLQEQQHGQGF		8	21	16	Q6J6V0; R4JAP5; D5FPF1; D3U329; A0A2R4Q9T1; A0A0U3AIG6; Q41552; Q68VI0	1	1470.73	13	NF	H	NF	NF	NF	NF	NF	2.86	2	735.87	-0.91	13.6015
	H	SQQQPPF		36	253	26	K7WV80; A0A3G3C4J5; K7WV72; B8XU59; P93792; Q8W3X5; A0A2P1BXV0; Q8W3V8; C8CCM7; Q6J6V0; R4JAP5; A9YWM3; D2DII6; D3U329; R4JFK3; R4JDM1; Q5MFK8; I3QPH1; A0A2R4Q9T1; A0A346R8U2; R4JB62; F1C940; A0A0U3AIG6; Q41552; K7XED4; D7RFI1; C8CCM8; F8SGM2; R4JD66; D5FPE9; A8CA05; A0A346R8T9; Q6B780; A0A2R4Q9V4; B2LX00; C6KI73	0	831.4	7	H	H	H	H	H	H	H	1.48	1	831.399	-1.26	10.1053
	H	SQQQQPFPQQQQPL	3xDeamidated [Q]	7	22	4	Q6J6V0; D3U329; A0A2R4Q9T1; I3QPH8; A0A0U3AIG6; Q41552; B8Y0L6	1	1684.78	14	NF	NF	H	NF	NF	NF	NF	1.11	2	842.888	-7.54	5.1621
	H	SQQQQPFPQQQQPLLL		5	19	7	Q6J6V0; D3U329; A0A2R4Q9T1; I3QPH8; Q41552	3	1908	16	NF	NF	H	H	NF	H	H	1.33	2	954.502	-0.72	26.7978
	H	SQQQQPPF		42	254	83	N1R0S5; A0A165R8I1; A9YRN9; B2LWZ2; A0A0A0R2J7; G9AYK6; A0A2P1BXV0; B5A810; C8CCM7; Q6J6V0; R4JFH5; Q5XXZ7; A9YWM3; Q6J6U9; A0A2R4Q9T7; D3U329; P93794; A0A0A0R2I8; B5A816; Q84NE4; A0A2R4Q9T1; Q2PQJ6; D0ES19; B5A813; A0A0U3AIG6; C8CCM8; D5FPE9; A0A2R4Q9U1; Q9XGF0; A8CA05; B2LWZ6; A0A346R8T9; Q84U16; T1LG74; A0A346R8T7; A0A346R8T6; A0A089VKK4; Q2L990; A0A0A0QYP7; A0A2R4Q9S5; B8XU51; X2JC88	0	959.458	8	H	H	H	H	H	H	H	2.1	2	480.233	-0.32	10.2887
	H	TSLAL		50	1284	464	D0F0C5; K7WV80; N1R0S5; K7WV72; A0A0A9RWM6; D0ES12; M7Z8V3; G9AYK6; A0A368QQ96; A0A2P1BXV0; Q670S2; I1ILT7; A0A0Q3GGG2; Q6J6V0; R4JFH5; A0A287GA23; R4JAP5; J3M5K7; Q6J6U9; A0A2R4Q9T7; M8AHS2; A0A0E0MHA4; D3U329; A0A1E5W740; F2DFY3; B5A816; Q84NE4; A0A0D9ZSX2; M0Y530; A0A0E0JEE4; A0A2R4Q9T1; A0A0D9UX31; R4JB62; A0A0E0L7K0; A0A0E0PGE1; R4JD66; A0A1Z5R643; A0A0E0JER3; A0A2R4Q9U1; A0A2R4Q9S8; Q9XGF0;…	1	504.303	5	H	H	H	H	H	H	H	1.74	1	504.303	-0.29	13.2342
TRUE	Master Protein	A0A2R4Q9T1	Low-molecular-weight glutenin subunit OS=Aegilops tauschii OX=37682 GN=LMW-GS PE=4 SV=1	68.2065	36	1279	2	1	368	42	8.32	H	H	H	H	H	H	H	907.57	36
	Confidence	Sequence	Modifications	# Protein Groups	# Proteins	# PSMs	Master Protein Accessions	# Missed Cleavages	Theo. MH+ [Da]	Sequence Length	Found in Sample Group: 1_AG38Duetto	Found in Sample Group: 5_AG167PI	Found in Sample Group: S_Semola	Found in Sample Group: 4_AG77Neolatino	Found in Sample Group: 3_AG69Lloyd	Found in Sample Group: SI_SemolaIntegrale	Found in Sample Group: 2_AG33Colosseo	XCorr Sequest HT	Charge Sequest HT	m/z [Da] Sequest HT	DeltaM [ppm] Sequest HT	RT [min] Sequest HT
	H	ARSQML		49	270	7	D0F0C5; J9QEK9; D0ES12; B2LWZ2; G0YLZ2; G9AYK6; A0A2P1BXV0; B5A810; C8CCM7; Q6J6V0; R4JFH5; A0A346R8U1; R4JAP5; A9YWM3; D3U329; P93794; J9QFV1; C6K8R8; A0A287EIZ3; F5A7G7; B5A816; Q84NE4; A0A2R4Q9T1; A0A346R8U2; F6KHQ0; R4JB62; D0ES19; B5A813; F1C940; A0A0U3AIG6; Q5XXZ9; D5FPE9; Q9XGF0; A8CA05; Q3YB17; B2LWZ6; A0A346R8T9; Q84U16; T1LG74; A0A346R8T7; A0A2R4Q9V4; A0A346R8T6; A0A089VKK4; Q2L990; A0A…	0	705.371	6	H	NF	H	H	H	H	H	1.23	1	705.37	-1.74	3.2777
	H	CSVNVPVY	1xCarbamidomethyl [C1]	22	93	3	A2IBK1; Q8W3X5; A0A2P1BXV0; Q6J6V0; A0A0U3ANN8; A0A346R8U1; R4JAP5; A9YWM3; D3U329; F8SGM9; A0A2R4Q9T1; R4JB62; D5FPF3; A0A0U3AIG6; C8CCM8; A2IBJ9; D5FPE9; A8CA05; F8SGM7; D5FPF4; Q68VI0; F8SGN9	3	937.445	8	NF	NF	H	NF	H	NF	H	1.18	1	937.444	-0.8	16.9848
	H	DAIRAIIY		25	101	217	A2IBK1; Q8W3X5; A0A2P1BXV0; Q6J6V0; A0A0U3ANN8; R4JAP5; A9YWM3; D5FPF1; D3U329; V9P785; F8SGM9; A0A2R4Q9T1; R4JB62; D5FPF3; A0A0U3AIG6; Q41552; C8CCM8; A2IBJ9; D5FPE9; A8CA05; F8SGM7; D5FPF4; Q68VI0; F8SGN9; B8Y0L6	0	934.536	8	H	H	H	H	H	H	H	2.32	2	467.772	0.44	19.2101
	H	GQWPQQQQVPQGTL		22	88	15	A2IBK1; Q8W3X5; A0A2P1BXV0; Q6J6V0; A0A0U3ANN8; R4JAP5; A9YWM3; D3U329; V9P785; F8SGM9; A0A2R4Q9T1; R4JB62; D5FPF3; A0A0U3AIG6; C8CCM8; A2IBJ9; A8CA05; F8SGM7; D5FPF4; Q68VI0; F8SGN9; B8Y0L6	1	1594.8	14	H	H	H	H	H	H	H	2.49	2	797.901	-1.57	19.641
	H	GQWPQQQQVPQGTLLQPHQIAQL		20	86	3	A2IBK1; Q8W3X5; A0A2P1BXV0; Q6J6V0; A0A0U3ANN8; R4JAP5; A9YWM3; D3U329; V9P785; F8SGM9; A0A2R4Q9T1; R4JB62; D5FPF3; A0A0U3AIG6; C8CCM8; A2IBJ9; A8CA05; D5FPF4; Q68VI0; F8SGN9	3	2623.37	23	NF	NF	NF	H	H	NF	NF	1.39	3	875.128	-1.24	25.9172
	H	LQPHQLAQL		53	256	324	D0F0C5; K7WV80; A9YRN9; C6K8R4; A0A287EFH8; D0ES12; B2LWZ2; G0YLZ2; G9AYK6; A0A2P1BXV0; Q670S2; B5A810; C8CCM7; Q6J6V0; R4JAP5; A9YWM3; D3U329; P93794; J9QFV1; C6K8R8; A0A287EIZ3; F5A7G7; B5A816; Q84NE4; A0A2R4Q9T1; A0A346R8U2; F6KHQ0; Q40026; R4JB62; Q84U17; B5A813; F1C940; A0A0U3AIG6; Q5XXZ9; C8CCM8; D5FPE9; Q9XGF0; A0A287EFG2; A8CA05; Q3YB17; B2LWZ6; A0A346R8T9; Q84U16; A0A346R8T7; A0A2R4Q9V4;…	2	1047.59	9	H	H	H	H	H	H	H	2.76	2	524.301	1.03	10.8766
	H	LQQQCSPVAMPQSL	1xCarbamidomethyl [C5]	33	198	8	R9XVA5; A2IBK1; Q8W3X5; A0A2P1BXV0; D5FPE3; C8CCM7; Q6J6V0; A2IBV5; A9YWM3; D5FPF1; D3U329; V9P785; F8SGM9; Q8W3W8; R4JDM1; A0A2R4Q9T1; K0I5W1; R4JB62; D5FPF3; A0A0U3AGE0; Q41552; Q8W3X4; C8CCM8; A2IBJ9; A8CA05; F8SGM7; D5FPF4; Q68VI0; F8SGN9; Q8W3X0; B2Y2R6; B8Y0L6; A0A0U3ATU4	1	1586.77	14	NF	NF	H	H	H	H	H	1.9	2	793.886	-1	21.583
	H	NQPQQQQPQQSVQGVSQPQQQQKQL		20	82	21	A2IBK1; Q8W3X5; A0A2P1BXV0; Q6J6V0; A0A0U3ANN8; R4JAP5; A9YWM3; D5FPF1; D3U329; V9P785; F8SGM9; A0A2R4Q9T1; R4JB62; Q41552; C8CCM8; A2IBJ9; A8CA05; F8SGM7; F8SGN9; B8Y0L6	0	2887.44	25	H	H	H	H	H	H	H	2.26	3	963.15	-1.6	7.5568
	H	QPHQLAQL		53	256	14	D0F0C5; K7WV80; A9YRN9; C6K8R4; A0A287EFH8; D0ES12; B2LWZ2; G0YLZ2; G9AYK6; A0A2P1BXV0; Q670S2; B5A810; C8CCM7; Q6J6V0; R4JAP5; A9YWM3; D3U329; P93794; J9QFV1; C6K8R8; A0A287EIZ3; F5A7G7; B5A816; Q84NE4; A0A2R4Q9T1; A0A346R8U2; F6KHQ0; Q40026; R4JB62; Q84U17; B5A813; F1C940; A0A0U3AIG6; Q5XXZ9; C8CCM8; D5FPE9; Q9XGF0; A0A287EFG2; A8CA05; Q3YB17; B2LWZ6; A0A346R8T9; Q84U16; A0A346R8T7; A0A2R4Q9V4;…	1	934.51	8	H	NF	H	H	H	H	H	1.53	2	467.759	0.32	5.8896
	H	QQLNPCKVF	1xCarbamidomethyl [C6]	46	251	287	D0F0C5; K7WV80; N1R0S5; K7WV72; G0YLZ2; G9AYK6; A0A2P1BXV0; I3QPG3; A0A346R8U0; Q6J6V0; R4JFH5; A0A346R8U1; R4JAP5; Q6J6U9; A0A2R4Q9T7; D3U329; R4JFK3; P93794; C6K8R8; A0A287EIZ3; B5A816; Q84NE4; I3QPH1; A0A2R4Q9T1; A0A346R8U2; Q40026; R4JB62; A0A0U3AIG6; D7RFI1; R4JD66; A0A2R4Q9U1; A0A2R4Q9S8; Q9XGF0; A8CA05; Q3YB17; B2LWZ6; A0A346R8T7; A0A2R4Q9V4; A0A346R8T6; A0A089VKK4; A8IEC6; A0A2R4Q9S5; B2L…	1	1133.58	9	H	H	H	H	H	H	H	2.56	2	567.292	0.33	14.0594
	H	QQLNPCKVF	1xGln->pyro-Glu [N-Term]; 1xCarbamidomethyl [C6]	46	250	108	D0F0C5; K7WV80; N1R0S5; K7WV72; G0YLZ2; G9AYK6; A0A2P1BXV0; I3QPG3; A0A346R8U0; Q6J6V0; R4JFH5; A0A346R8U1; R4JAP5; Q6J6U9; A0A2R4Q9T7; D3U329; R4JFK3; P93794; C6K8R8; A0A287EIZ3; B5A816; Q84NE4; I3QPH1; A0A2R4Q9T1; A0A346R8U2; Q40026; R4JB62; A0A0U3AIG6; D7RFI1; R4JD66; A0A2R4Q9U1; A0A2R4Q9S8; Q9XGF0; A8CA05; Q3YB17; B2LWZ6; A0A346R8T7; A0A2R4Q9V4; A0A346R8T6; A0A089VKK4; A8IEC6; A0A2R4Q9S5; B2L…	1	1116.55	9	H	H	H	H	H	H	H	1.47	1	1116.55	0.02	23.8566
	H	QQQCCQQL	2xCarbamidomethyl [C4; C5]	66	374	29	D0F0C5; M7ZW11; K7WV80; N1R0S5; B6UKM2; C6K8R4; A0A287EFH8; D0ES12; Q84M19; E5FF15; W8E194; A0A0N7A5G3; I3QPG3; A0A0K2GSM3; W8E1A2; K7WZA8; P06471; Q6J6V0; R4JFH5; F5A7G9; R4JAP5; H8Y0E0; Q6J6U9; D3U329; A0A024A3B7; R4JFK3; P93794; E3UTY1; Q0PIV6; W8E6H6; A0A287EIZ3; A0A0K2GRS0; H8Y0M0; A0A0N7A547; I3QPH1; A0A2R4Q9T1; C5MQZ6; Q40026; A0A0N7A503; B6UKR2; B6UKQ9; W8E6G7; E5FF35; K7XED4; A0A0N7A522;…	0	1092.46	8	H	H	H	H	H	H	H	1.53	1	1092.45	-1.04	3.8792
	H	SIVLQEQQHGQGF		8	21	16	Q6J6V0; R4JAP5; D5FPF1; D3U329; A0A2R4Q9T1; A0A0U3AIG6; Q41552; Q68VI0	1	1470.73	13	NF	H	NF	NF	NF	NF	NF	2.86	2	735.87	-0.91	13.6015
	H	SQQQPPF		36	253	26	K7WV80; A0A3G3C4J5; K7WV72; B8XU59; P93792; Q8W3X5; A0A2P1BXV0; Q8W3V8; C8CCM7; Q6J6V0; R4JAP5; A9YWM3; D2DII6; D3U329; R4JFK3; R4JDM1; Q5MFK8; I3QPH1; A0A2R4Q9T1; A0A346R8U2; R4JB62; F1C940; A0A0U3AIG6; Q41552; K7XED4; D7RFI1; C8CCM8; F8SGM2; R4JD66; D5FPE9; A8CA05; A0A346R8T9; Q6B780; A0A2R4Q9V4; B2LX00; C6KI73	0	831.4	7	H	H	H	H	H	H	H	1.48	1	831.399	-1.26	10.1053
	H	SQQQQPFPQQQQPL	3xDeamidated [Q]	7	22	4	Q6J6V0; D3U329; A0A2R4Q9T1; I3QPH8; A0A0U3AIG6; Q41552; B8Y0L6	1	1684.78	14	NF	NF	H	NF	NF	NF	NF	1.11	2	842.888	-7.54	5.1621
	H	SQQQQPFPQQQQPLLL		5	19	7	Q6J6V0; D3U329; A0A2R4Q9T1; I3QPH8; Q41552	3	1908	16	NF	NF	H	H	NF	H	H	1.33	2	954.502	-0.72	26.7978
	H	SQQQQPPF		42	254	83	N1R0S5; A0A165R8I1; A9YRN9; B2LWZ2; A0A0A0R2J7; G9AYK6; A0A2P1BXV0; B5A810; C8CCM7; Q6J6V0; R4JFH5; Q5XXZ7; A9YWM3; Q6J6U9; A0A2R4Q9T7; D3U329; P93794; A0A0A0R2I8; B5A816; Q84NE4; A0A2R4Q9T1; Q2PQJ6; D0ES19; B5A813; A0A0U3AIG6; C8CCM8; D5FPE9; A0A2R4Q9U1; Q9XGF0; A8CA05; B2LWZ6; A0A346R8T9; Q84U16; T1LG74; A0A346R8T7; A0A346R8T6; A0A089VKK4; Q2L990; A0A0A0QYP7; A0A2R4Q9S5; B8XU51; X2JC88	0	959.458	8	H	H	H	H	H	H	H	2.1	2	480.233	-0.32	10.2887
	H	TSLAL		50	1284	464	D0F0C5; K7WV80; N1R0S5; K7WV72; A0A0A9RWM6; D0ES12; M7Z8V3; G9AYK6; A0A368QQ96; A0A2P1BXV0; Q670S2; I1ILT7; A0A0Q3GGG2; Q6J6V0; R4JFH5; A0A287GA23; R4JAP5; J3M5K7; Q6J6U9; A0A2R4Q9T7; M8AHS2; A0A0E0MHA4; D3U329; A0A1E5W740; F2DFY3; B5A816; Q84NE4; A0A0D9ZSX2; M0Y530; A0A0E0JEE4; A0A2R4Q9T1; A0A0D9UX31; R4JB62; A0A0E0L7K0; A0A0E0PGE1; R4JD66; A0A1Z5R643; A0A0E0JER3; A0A2R4Q9U1; A0A2R4Q9S8; Q9XGF0;…	1	504.303	5	H	H	H	H	H	H	H	1.74	1	504.303	-0.29	13.2342
TRUE	Master Protein	Q6J6V0	Low molecular weight glutenin subunit LMW.S6 OS=Aegilops tauschii OX=37682 PE=4 SV=1	71.2329	35	1281	1	1	365	41.7	8.32	H	H	H	H	H	H	H	907.57	35
	Confidence	Sequence	Modifications	# Protein Groups	# Proteins	# PSMs	Master Protein Accessions	# Missed Cleavages	Theo. MH+ [Da]	Sequence Length	Found in Sample Group: 1_AG38Duetto	Found in Sample Group: 5_AG167PI	Found in Sample Group: S_Semola	Found in Sample Group: 4_AG77Neolatino	Found in Sample Group: 3_AG69Lloyd	Found in Sample Group: SI_SemolaIntegrale	Found in Sample Group: 2_AG33Colosseo	XCorr Sequest HT	Charge Sequest HT	m/z [Da] Sequest HT	DeltaM [ppm] Sequest HT	RT [min] Sequest HT
	H	ARSQML		49	270	7	D0F0C5; J9QEK9; D0ES12; B2LWZ2; G0YLZ2; G9AYK6; A0A2P1BXV0; B5A810; C8CCM7; Q6J6V0; R4JFH5; A0A346R8U1; R4JAP5; A9YWM3; D3U329; P93794; J9QFV1; C6K8R8; A0A287EIZ3; F5A7G7; B5A816; Q84NE4; A0A2R4Q9T1; A0A346R8U2; F6KHQ0; R4JB62; D0ES19; B5A813; F1C940; A0A0U3AIG6; Q5XXZ9; D5FPE9; Q9XGF0; A8CA05; Q3YB17; B2LWZ6; A0A346R8T9; Q84U16; T1LG74; A0A346R8T7; A0A2R4Q9V4; A0A346R8T6; A0A089VKK4; Q2L990; A0A…	0	705.371	6	H	NF	H	H	H	H	H	1.23	1	705.37	-1.74	3.2777
	H	CSVNVPVY	1xCarbamidomethyl [C1]	22	93	3	A2IBK1; Q8W3X5; A0A2P1BXV0; Q6J6V0; A0A0U3ANN8; A0A346R8U1; R4JAP5; A9YWM3; D3U329; F8SGM9; A0A2R4Q9T1; R4JB62; D5FPF3; A0A0U3AIG6; C8CCM8; A2IBJ9; D5FPE9; A8CA05; F8SGM7; D5FPF4; Q68VI0; F8SGN9	3	937.445	8	NF	NF	H	NF	H	NF	H	1.18	1	937.444	-0.8	16.9848
	H	DAIRAIIY		25	101	217	A2IBK1; Q8W3X5; A0A2P1BXV0; Q6J6V0; A0A0U3ANN8; R4JAP5; A9YWM3; D5FPF1; D3U329; V9P785; F8SGM9; A0A2R4Q9T1; R4JB62; D5FPF3; A0A0U3AIG6; Q41552; C8CCM8; A2IBJ9; D5FPE9; A8CA05; F8SGM7; D5FPF4; Q68VI0; F8SGN9; B8Y0L6	0	934.536	8	H	H	H	H	H	H	H	2.32	2	467.772	0.44	19.2101
	H	GQWPQQQQVPQGTL		22	88	15	A2IBK1; Q8W3X5; A0A2P1BXV0; Q6J6V0; A0A0U3ANN8; R4JAP5; A9YWM3; D3U329; V9P785; F8SGM9; A0A2R4Q9T1; R4JB62; D5FPF3; A0A0U3AIG6; C8CCM8; A2IBJ9; A8CA05; F8SGM7; D5FPF4; Q68VI0; F8SGN9; B8Y0L6	1	1594.8	14	H	H	H	H	H	H	H	2.49	2	797.901	-1.57	19.641
	H	GQWPQQQQVPQGTLLQPHQIAQL		20	86	3	A2IBK1; Q8W3X5; A0A2P1BXV0; Q6J6V0; A0A0U3ANN8; R4JAP5; A9YWM3; D3U329; V9P785; F8SGM9; A0A2R4Q9T1; R4JB62; D5FPF3; A0A0U3AIG6; C8CCM8; A2IBJ9; A8CA05; D5FPF4; Q68VI0; F8SGN9	3	2623.37	23	NF	NF	NF	H	H	NF	NF	1.39	3	875.128	-1.24	25.9172
	H	LQPHQLAQL		53	256	324	D0F0C5; K7WV80; A9YRN9; C6K8R4; A0A287EFH8; D0ES12; B2LWZ2; G0YLZ2; G9AYK6; A0A2P1BXV0; Q670S2; B5A810; C8CCM7; Q6J6V0; R4JAP5; A9YWM3; D3U329; P93794; J9QFV1; C6K8R8; A0A287EIZ3; F5A7G7; B5A816; Q84NE4; A0A2R4Q9T1; A0A346R8U2; F6KHQ0; Q40026; R4JB62; Q84U17; B5A813; F1C940; A0A0U3AIG6; Q5XXZ9; C8CCM8; D5FPE9; Q9XGF0; A0A287EFG2; A8CA05; Q3YB17; B2LWZ6; A0A346R8T9; Q84U16; A0A346R8T7; A0A2R4Q9V4;…	2	1047.59	9	H	H	H	H	H	H	H	2.76	2	524.301	1.03	10.8766
	H	LQQQCSPVAMPQSL	1xCarbamidomethyl [C5]	33	198	8	R9XVA5; A2IBK1; Q8W3X5; A0A2P1BXV0; D5FPE3; C8CCM7; Q6J6V0; A2IBV5; A9YWM3; D5FPF1; D3U329; V9P785; F8SGM9; Q8W3W8; R4JDM1; A0A2R4Q9T1; K0I5W1; R4JB62; D5FPF3; A0A0U3AGE0; Q41552; Q8W3X4; C8CCM8; A2IBJ9; A8CA05; F8SGM7; D5FPF4; Q68VI0; F8SGN9; Q8W3X0; B2Y2R6; B8Y0L6; A0A0U3ATU4	1	1586.77	14	NF	NF	H	H	H	H	H	1.9	2	793.886	-1	21.583
	H	NQPQQQQPQQSVQGVSQPQQQQKQL		20	82	21	A2IBK1; Q8W3X5; A0A2P1BXV0; Q6J6V0; A0A0U3ANN8; R4JAP5; A9YWM3; D5FPF1; D3U329; V9P785; F8SGM9; A0A2R4Q9T1; R4JB62; Q41552; C8CCM8; A2IBJ9; A8CA05; F8SGM7; F8SGN9; B8Y0L6	0	2887.44	25	H	H	H	H	H	H	H	2.26	3	963.15	-1.6	7.5568
	H	QPHQLAQL		53	256	14	D0F0C5; K7WV80; A9YRN9; C6K8R4; A0A287EFH8; D0ES12; B2LWZ2; G0YLZ2; G9AYK6; A0A2P1BXV0; Q670S2; B5A810; C8CCM7; Q6J6V0; R4JAP5; A9YWM3; D3U329; P93794; J9QFV1; C6K8R8; A0A287EIZ3; F5A7G7; B5A816; Q84NE4; A0A2R4Q9T1; A0A346R8U2; F6KHQ0; Q40026; R4JB62; Q84U17; B5A813; F1C940; A0A0U3AIG6; Q5XXZ9; C8CCM8; D5FPE9; Q9XGF0; A0A287EFG2; A8CA05; Q3YB17; B2LWZ6; A0A346R8T9; Q84U16; A0A346R8T7; A0A2R4Q9V4;…	1	934.51	8	H	NF	H	H	H	H	H	1.53	2	467.759	0.32	5.8896
	H	QQLNPCKVF	1xCarbamidomethyl [C6]	46	251	287	D0F0C5; K7WV80; N1R0S5; K7WV72; G0YLZ2; G9AYK6; A0A2P1BXV0; I3QPG3; A0A346R8U0; Q6J6V0; R4JFH5; A0A346R8U1; R4JAP5; Q6J6U9; A0A2R4Q9T7; D3U329; R4JFK3; P93794; C6K8R8; A0A287EIZ3; B5A816; Q84NE4; I3QPH1; A0A2R4Q9T1; A0A346R8U2; Q40026; R4JB62; A0A0U3AIG6; D7RFI1; R4JD66; A0A2R4Q9U1; A0A2R4Q9S8; Q9XGF0; A8CA05; Q3YB17; B2LWZ6; A0A346R8T7; A0A2R4Q9V4; A0A346R8T6; A0A089VKK4; A8IEC6; A0A2R4Q9S5; B2L…	1	1133.58	9	H	H	H	H	H	H	H	2.56	2	567.292	0.33	14.0594
	H	QQLNPCKVF	1xGln->pyro-Glu [N-Term]; 1xCarbamidomethyl [C6]	46	250	108	D0F0C5; K7WV80; N1R0S5; K7WV72; G0YLZ2; G9AYK6; A0A2P1BXV0; I3QPG3; A0A346R8U0; Q6J6V0; R4JFH5; A0A346R8U1; R4JAP5; Q6J6U9; A0A2R4Q9T7; D3U329; R4JFK3; P93794; C6K8R8; A0A287EIZ3; B5A816; Q84NE4; I3QPH1; A0A2R4Q9T1; A0A346R8U2; Q40026; R4JB62; A0A0U3AIG6; D7RFI1; R4JD66; A0A2R4Q9U1; A0A2R4Q9S8; Q9XGF0; A8CA05; Q3YB17; B2LWZ6; A0A346R8T7; A0A2R4Q9V4; A0A346R8T6; A0A089VKK4; A8IEC6; A0A2R4Q9S5; B2L…	1	1116.55	9	H	H	H	H	H	H	H	1.47	1	1116.55	0.02	23.8566
	H	QQQCCQQL	2xCarbamidomethyl [C4; C5]	66	374	29	D0F0C5; M7ZW11; K7WV80; N1R0S5; B6UKM2; C6K8R4; A0A287EFH8; D0ES12; Q84M19; E5FF15; W8E194; A0A0N7A5G3; I3QPG3; A0A0K2GSM3; W8E1A2; K7WZA8; P06471; Q6J6V0; R4JFH5; F5A7G9; R4JAP5; H8Y0E0; Q6J6U9; D3U329; A0A024A3B7; R4JFK3; P93794; E3UTY1; Q0PIV6; W8E6H6; A0A287EIZ3; A0A0K2GRS0; H8Y0M0; A0A0N7A547; I3QPH1; A0A2R4Q9T1; C5MQZ6; Q40026; A0A0N7A503; B6UKR2; B6UKQ9; W8E6G7; E5FF35; K7XED4; A0A0N7A522;…	0	1092.46	8	H	H	H	H	H	H	H	1.53	1	1092.45	-1.04	3.8792
	H	SIVLQEQQHGQGF		8	21	16	Q6J6V0; R4JAP5; D5FPF1; D3U329; A0A2R4Q9T1; A0A0U3AIG6; Q41552; Q68VI0	1	1470.73	13	NF	H	NF	NF	NF	NF	NF	2.86	2	735.87	-0.91	13.6015
	H	SQQQPPF		36	253	26	K7WV80; A0A3G3C4J5; K7WV72; B8XU59; P93792; Q8W3X5; A0A2P1BXV0; Q8W3V8; C8CCM7; Q6J6V0; R4JAP5; A9YWM3; D2DII6; D3U329; R4JFK3; R4JDM1; Q5MFK8; I3QPH1; A0A2R4Q9T1; A0A346R8U2; R4JB62; F1C940; A0A0U3AIG6; Q41552; K7XED4; D7RFI1; C8CCM8; F8SGM2; R4JD66; D5FPE9; A8CA05; A0A346R8T9; Q6B780; A0A2R4Q9V4; B2LX00; C6KI73	0	831.4	7	H	H	H	H	H	H	H	1.48	1	831.399	-1.26	10.1053
	H	SQQQQPFPQQQQPL	3xDeamidated [Q]	7	22	4	Q6J6V0; D3U329; A0A2R4Q9T1; I3QPH8; A0A0U3AIG6; Q41552; B8Y0L6	1	1684.78	14	NF	NF	H	NF	NF	NF	NF	1.11	2	842.888	-7.54	5.1621
	H	SQQQQPFPQQQQPLLL		5	19	7	Q6J6V0; D3U329; A0A2R4Q9T1; I3QPH8; Q41552	3	1908	16	NF	NF	H	H	NF	H	H	1.33	2	954.502	-0.72	26.7978
	H	SQQQQPPF		42	254	83	N1R0S5; A0A165R8I1; A9YRN9; B2LWZ2; A0A0A0R2J7; G9AYK6; A0A2P1BXV0; B5A810; C8CCM7; Q6J6V0; R4JFH5; Q5XXZ7; A9YWM3; Q6J6U9; A0A2R4Q9T7; D3U329; P93794; A0A0A0R2I8; B5A816; Q84NE4; A0A2R4Q9T1; Q2PQJ6; D0ES19; B5A813; A0A0U3AIG6; C8CCM8; D5FPE9; A0A2R4Q9U1; Q9XGF0; A8CA05; B2LWZ6; A0A346R8T9; Q84U16; T1LG74; A0A346R8T7; A0A346R8T6; A0A089VKK4; Q2L990; A0A0A0QYP7; A0A2R4Q9S5; B8XU51; X2JC88	0	959.458	8	H	H	H	H	H	H	H	2.1	2	480.233	-0.32	10.2887
	H	TSLAL		50	1284	464	D0F0C5; K7WV80; N1R0S5; K7WV72; A0A0A9RWM6; D0ES12; M7Z8V3; G9AYK6; A0A368QQ96; A0A2P1BXV0; Q670S2; I1ILT7; A0A0Q3GGG2; Q6J6V0; R4JFH5; A0A287GA23; R4JAP5; J3M5K7; Q6J6U9; A0A2R4Q9T7; M8AHS2; A0A0E0MHA4; D3U329; A0A1E5W740; F2DFY3; B5A816; Q84NE4; A0A0D9ZSX2; M0Y530; A0A0E0JEE4; A0A2R4Q9T1; A0A0D9UX31; R4JB62; A0A0E0L7K0; A0A0E0PGE1; R4JD66; A0A1Z5R643; A0A0E0JER3; A0A2R4Q9U1; A0A2R4Q9S8; Q9XGF0;…	1	504.303	5	H	H	H	H	H	H	H	1.74	1	504.303	-0.29	13.2342
TRUE	Master Protein	R9XU77	Alpha-gliadin OS=Triticum aestivum OX=4565 GN=gli-2 PE=4 SV=1	39.527	10	505	2	1	296	34.1	7.4	H	H	H	H	H	H	H	902.4	10
	Confidence	Sequence	Modifications	# Protein Groups	# Proteins	# PSMs	Master Protein Accessions	# Missed Cleavages	Theo. MH+ [Da]	Sequence Length	Found in Sample Group: 1_AG38Duetto	Found in Sample Group: 5_AG167PI	Found in Sample Group: S_Semola	Found in Sample Group: 4_AG77Neolatino	Found in Sample Group: 3_AG69Lloyd	Found in Sample Group: SI_SemolaIntegrale	Found in Sample Group: 2_AG33Colosseo	XCorr Sequest HT	Charge Sequest HT	m/z [Da] Sequest HT	DeltaM [ppm] Sequest HT	RT [min] Sequest HT
	H	HQQQKQQQQPSSQVSF		15	195	16	A0A1P8DSI8; A0A1P8DT82; Q9M4L8; Q41533; M4WEQ6; H9NAK8; I0CCD0; A0A1P8DT06; A0A023WGB8; A0A0E3Z5X0; Q0GK30; A0A1P8DSE0; R9XU77; A0A1P8DT27; A0A0E3Z5C7	0	1912.93	16	NF	H	H	H	H	H	H	2.1	2	956.964	-2.52	3.4526
	H	IGQQQPFPPQQPYPQPQPFPSQQPY		14	259	699	A0A1P8DSI8; A0A1P8DT82; M4WFC9; I3RXV8; Q41533; A0A1P8DT06; A0A023WGB8; A0A0E3URA8; D2X6C9; A0A0K2QJD8; Q0GK30; A0A1P8DSE3; A0A1P8DSG6; R9XU77	3	2922.42	25	H	H	H	H	H	H	H	4.46	2	1461.71	-0.59	26.6583
	H	LQLQPFPQPQLSY		1	14	68	R9XU77	4	1558.83	13	H	H	H	H	NF	H	H	3.64	2	779.916	-1.06	31.777
	H	QPQNPSQQQPQEQIPLV		1	1	16	R9XU77	2	1958.99	17	NF	H	H	H	NF	H	H	2.31	2	980	-0.47	16.4754
	H	QQYPL		19	265	70	A0A1P8DSI8; A0A0E3UQX3; A0A1P8DT82; Q9M4L8; Q41533; M4WEQ6; H9NAK8; I0CCD0; A0A1P8DT06; H8Y0D1; A0A023WGB8; A0A0E3Z5X0; A0A0N7A547; Q0GK30; A0A1P8DSE0; A0A0E3UR88; A0A0D9XG85; R9XU77; A0A1P8DT27	1	648.335	5	H	H	H	H	H	H	H	1.28	1	648.334	-1.52	11.483
	H	QQYPLGQGSF		17	234	30	A0A1P8DSI8; A0A0E3UQX3; A0A1P8DT82; Q9M4L8; Q41533; M4WEQ6; H9NAK8; I0CCD0; A0A1P8DT06; H8Y0D1; A0A023WGB8; A0A0E3Z5X0; Q0GK30; A0A1P8DSE0; A0A0E3UR88; R9XU77; A0A1P8DT27	2	1124.54	10	H	H	H	H	H	H	H	2.19	1	1124.54	-1.4	20.3788
TRUE	Master Protein	Q8W3X5	Low-molecular-weight glutenin subunit group 2 type I OS=Triticum aestivum OX=4565 GN=lmw-gs PE=4 SV=1	83.6735	41	1126	1	1	343	39	8.32	H	H	H	H	H	H	H	871.71	41
	Confidence	Sequence	Modifications	# Protein Groups	# Proteins	# PSMs	Master Protein Accessions	# Missed Cleavages	Theo. MH+ [Da]	Sequence Length	Found in Sample Group: 1_AG38Duetto	Found in Sample Group: 5_AG167PI	Found in Sample Group: S_Semola	Found in Sample Group: 4_AG77Neolatino	Found in Sample Group: 3_AG69Lloyd	Found in Sample Group: SI_SemolaIntegrale	Found in Sample Group: 2_AG33Colosseo	XCorr Sequest HT	Charge Sequest HT	m/z [Da] Sequest HT	DeltaM [ppm] Sequest HT	RT [min] Sequest HT
	H	CSVNVPVY	1xCarbamidomethyl [C1]	22	93	3	A2IBK1; Q8W3X5; A0A2P1BXV0; Q6J6V0; A0A0U3ANN8; A0A346R8U1; R4JAP5; A9YWM3; D3U329; F8SGM9; A0A2R4Q9T1; R4JB62; D5FPF3; A0A0U3AIG6; C8CCM8; A2IBJ9; D5FPE9; A8CA05; F8SGM7; D5FPF4; Q68VI0; F8SGN9	3	937.445	8	NF	NF	H	NF	H	NF	H	1.18	1	937.444	-0.8	16.9848
	H	DAIRAIIY		25	101	217	A2IBK1; Q8W3X5; A0A2P1BXV0; Q6J6V0; A0A0U3ANN8; R4JAP5; A9YWM3; D5FPF1; D3U329; V9P785; F8SGM9; A0A2R4Q9T1; R4JB62; D5FPF3; A0A0U3AIG6; Q41552; C8CCM8; A2IBJ9; D5FPE9; A8CA05; F8SGM7; D5FPF4; Q68VI0; F8SGN9; B8Y0L6	0	934.536	8	H	H	H	H	H	H	H	2.32	2	467.772	0.44	19.2101
	H	GQWPQQQQVPQGTL		22	88	15	A2IBK1; Q8W3X5; A0A2P1BXV0; Q6J6V0; A0A0U3ANN8; R4JAP5; A9YWM3; D3U329; V9P785; F8SGM9; A0A2R4Q9T1; R4JB62; D5FPF3; A0A0U3AIG6; C8CCM8; A2IBJ9; A8CA05; F8SGM7; D5FPF4; Q68VI0; F8SGN9; B8Y0L6	1	1594.8	14	H	H	H	H	H	H	H	2.49	2	797.901	-1.57	19.641
	H	GQWPQQQQVPQGTLLQPHQIAQL		20	86	3	A2IBK1; Q8W3X5; A0A2P1BXV0; Q6J6V0; A0A0U3ANN8; R4JAP5; A9YWM3; D3U329; V9P785; F8SGM9; A0A2R4Q9T1; R4JB62; D5FPF3; A0A0U3AIG6; C8CCM8; A2IBJ9; A8CA05; D5FPF4; Q68VI0; F8SGN9	3	2623.37	23	NF	NF	NF	H	H	NF	NF	1.39	3	875.128	-1.24	25.9172
	H	GTTTIVPF		12	67	14	Q8W3X5; A0A2P1BXV0; A0A0U3ANN8; F8SGM9; R4JB62; C8CCM8; A2IBJ9; A8CA05; F8SGM7; D5FPF4; Q68VI0; F8SGN9	0	835.456	8	H	H	H	H	H	H	H	1.56	1	835.456	0.58	24.7638
	H	GVGTRVGAY		18	72	20	A2IBK1; Q8W3X5; A0A2P1BXV0; A0A0U3ANN8; R4JAP5; A9YWM3; D5FPF1; D3U329; F8SGM9; R4JB62; D5FPF3; C8CCM8; A2IBJ9; A8CA05; F8SGM7; D5FPF4; F8SGN9; B8Y0L6	0	879.468	9	H	H	H	H	H	H	H	1.63	2	440.237	-1.23	3.9266
	H	LPQQPPFSQQQPPF		11	66	12	Q8W3X5; A0A2P1BXV0; A0A0U3ANN8; A9YWM3; V9P785; F8SGM9; R4JB62; A0A0U3AIG6; F8SGM7; D5FPF4; B8Y0L6	2	1638.83	14	NF	NF	H	H	H	H	H	2.28	2	819.917	-0.39	25.3965
	H	LQQQCSPVAMPQSL	1xCarbamidomethyl [C5]	33	198	8	R9XVA5; A2IBK1; Q8W3X5; A0A2P1BXV0; D5FPE3; C8CCM7; Q6J6V0; A2IBV5; A9YWM3; D5FPF1; D3U329; V9P785; F8SGM9; Q8W3W8; R4JDM1; A0A2R4Q9T1; K0I5W1; R4JB62; D5FPF3; A0A0U3AGE0; Q41552; Q8W3X4; C8CCM8; A2IBJ9; A8CA05; F8SGM7; D5FPF4; Q68VI0; F8SGN9; Q8W3X0; B2Y2R6; B8Y0L6; A0A0U3ATU4	1	1586.77	14	NF	NF	H	H	H	H	H	1.9	2	793.886	-1	21.583
	H	NQPQQQQPQQSVQGVSQPQQQQKQL		20	82	21	A2IBK1; Q8W3X5; A0A2P1BXV0; Q6J6V0; A0A0U3ANN8; R4JAP5; A9YWM3; D5FPF1; D3U329; V9P785; F8SGM9; A0A2R4Q9T1; R4JB62; Q41552; C8CCM8; A2IBJ9; A8CA05; F8SGM7; F8SGN9; B8Y0L6	0	2887.44	25	H	H	H	H	H	H	H	2.26	3	963.15	-1.6	7.5568
	H	QQPQQQQL		26	108	96	G0YLZ2; A2IBK1; Q8W3X5; A0A2P1BXV0; A0A0U3ANN8; Q5XXZ7; R4JAP5; A9YWM3; D5FPF1; V9P785; F8SGM9; R4JB62; D5FPF3; A0A0U3AGE0; A0A0U3AIG6; C8CCM8; A2IBJ9; D5FPE9; A8CA05; F8SGM7; D4HNA5; D5FPF4; F5A7G6; Q68VI0; F8SGN9; B8Y0L6	0	997.506	8	H	H	H	H	H	H	H	2.65	1	997.505	-0.95	3.8091
	H	QQPQQQQL	1xGln->pyro-Glu [N-Term]	25	103	5	G0YLZ2; A2IBK1; Q8W3X5; A0A2P1BXV0; A0A0U3ANN8; Q5XXZ7; R4JAP5; A9YWM3; D5FPF1; V9P785; F8SGM9; R4JB62; D5FPF3; A0A0U3AIG6; C8CCM8; A2IBJ9; D5FPE9; A8CA05; F8SGM7; D4HNA5; D5FPF4; F5A7G6; Q68VI0; F8SGN9; B8Y0L6	0	980.48	8	NF	NF	NF	NF	H	H	H	1.55	2	490.743	-0.23	11.7416
	H	QQQPIPL		17	76	166	A2IBK1; Q8W3X5; A0A2P1BXV0; A0A0U3ANN8; A9YWM3; V9P785; F8SGM9; R4JB62; C8CCM8; A2IBJ9; A8CA05; F8SGM7; A7X9Y0; D5FPF4; Q68VI0; F8SGN9; B8Y0L6	0	823.467	7	H	H	H	H	H	H	H	1.76	1	823.466	-0.9	16.4551
	H	QQQPLPL	1xGln->pyro-Glu [N-Term]	17	76	42	A2IBK1; Q8W3X5; A0A2P1BXV0; A0A0U3ANN8; A9YWM3; V9P785; F8SGM9; R4JB62; C8CCM8; A2IBJ9; A8CA05; F8SGM7; A7X9Y0; D5FPF4; Q68VI0; F8SGN9; B8Y0L6	1	806.441	7	H	NF	H	H	H	H	H	1.05	1	806.44	-0.23	27.8002
	H	QQQPLPLQQILW		17	74	22	A2IBK1; Q8W3X5; A0A2P1BXV0; A0A0U3ANN8; A9YWM3; V9P785; F8SGM9; R4JB62; C8CCM8; A2IBJ9; A8CA05; F8SGM7; A7X9Y0; D5FPF4; Q68VI0; F8SGN9; B8Y0L6	3	1491.83	12	NF	NF	H	H	H	H	H	2.41	2	746.419	-0.73	38.6784
	H	RTLPTMCSVNVPVY	1xCarbamidomethyl [C7]	16	71	34	A2IBK1; Q8W3X5; A0A2P1BXV0; A0A0U3ANN8; R4JAP5; A9YWM3; F8SGM9; R4JB62; D5FPF3; C8CCM8; A2IBJ9; A8CA05; F8SGM7; D5FPF4; Q68VI0; F8SGN9	1	1636.82	14	H	H	H	H	H	H	H	2.98	2	818.912	-0.76	21.4662
	H	RTLPTMCSVNVPVY	1xOxidation [M6]; 1xCarbamidomethyl [C7]	16	71	9	A2IBK1; Q8W3X5; A0A2P1BXV0; A0A0U3ANN8; R4JAP5; A9YWM3; F8SGM9; R4JB62; D5FPF3; C8CCM8; A2IBJ9; A8CA05; F8SGM7; D5FPF4; Q68VI0; F8SGN9	1	1652.81	14	H	NF	NF	H	H	NF	H	2.36	2	826.909	-1.08	16.5473
	H	RTLPTMCSVNVPVYGTTTIVPF	1xCarbamidomethyl [C7]	12	65	51	Q8W3X5; A0A2P1BXV0; A0A0U3ANN8; F8SGM9; R4JB62; C8CCM8; A2IBJ9; A8CA05; F8SGM7; D5FPF4; Q68VI0; F8SGN9	2	2453.26	22	H	H	H	H	H	H	H	3.94	2	1227.13	-0.53	32.7605
	H	SIVLQEQQHGQGL		13	73	76	A2IBK1; Q8W3X5; A0A2P1BXV0; A0A0U3ANN8; A9YWM3; V9P785; F8SGM9; R4JB62; C8CCM8; A2IBJ9; A8CA05; F8SGM7; D5FPF4	1	1436.75	13	H	H	H	H	H	H	H	3.2	2	718.878	0.24	12.2673
	H	SIVLQEQQHGQGLNQPQQQQPQQSVQGVSQPQQQQKQL	1xDeamidated [Q]	12	60	7	A2IBK1; Q8W3X5; A0A2P1BXV0; A0A0U3ANN8; A9YWM3; V9P785; F8SGM9; R4JB62; C8CCM8; A2IBJ9; A8CA05; F8SGM7	2	4306.16	38	NF	NF	NF	NF	NF	H	NF	1.02	3	1436.06	-0.21	13.363
	H	SQHQQPVLPQQQIPSVQPSIL		12	68	55	A2IBK1; Q8W3X5; A0A2P1BXV0; V9P785; F8SGM9; R4JB62; A2IBJ9; A8CA05; F8SGM7; D5FPF4; F8SGN9; B8Y0L6	1	2352.27	21	H	H	H	H	H	H	H	4.59	2	1176.64	-0.05	23.8399
	H	SQQQPPF		36	253	26	K7WV80; A0A3G3C4J5; K7WV72; B8XU59; P93792; Q8W3X5; A0A2P1BXV0; Q8W3V8; C8CCM7; Q6J6V0; R4JAP5; A9YWM3; D2DII6; D3U329; R4JFK3; R4JDM1; Q5MFK8; I3QPH1; A0A2R4Q9T1; A0A346R8U2; R4JB62; F1C940; A0A0U3AIG6; Q41552; K7XED4; D7RFI1; C8CCM8; F8SGM2; R4JD66; D5FPE9; A8CA05; A0A346R8T9; Q6B780; A0A2R4Q9V4; B2LX00; C6KI73	0	831.4	7	H	H	H	H	H	H	H	1.48	1	831.399	-1.26	10.1053
	H	SQQQQPPFSQQQPPFSQQQQPVL	3xDeamidated [Q]	9	80	10	A2IBK1; Q8W3X5; A0A2P1BXV0; C8CCM7; A0A0U3ANN8; R4JDM1; K0I5W1; D5FPF3; B8Y0L6	3	2683.26	23	NF	H	NF	NF	NF	NF	NF	1.09	3	895.089	-4.45	17.1276
	H	SQQQQPVIPQQPPF		51	229	62	D0F0C5; N1R0S5; C6K8R4; D3UAL8; D0ES12; G0YLZ2; R9XVA5; A2IBK1; Q8W3X5; A0A2P1BXV0; B5TWK5; I3QPG3; Q84U12; D5FPE3; B5A810; C8CCM7; R4JAP5; D5FPF1; Q6J6U9; A0A2R4Q9T7; V9P6P6; C6K8R8; V9P769; Q8W3W8; B5A816; R9XUW0; R4JB62; D5FPF3; A0A0U3AGE0; B5A813; F1C940; Q8W3X4; A2IBJ9; R9YSZ0; F8SGQ2; A0A2R4Q9U1; Q9XGF0; A7XDG0; Q84U16; A7X9Y0; D5FPF4; A0A2R4Q9S5; F5A7G6; F8SGP8; Q68VI0; Q0Q2J1; Q8W3X0; X2J…	0	1621.83	14	H	H	H	H	H	H	H	2.91	2	811.419	-0.97	23.216
	H	YQQQQPIQQQPQPF		13	65	7	A2IBK1; Q8W3X5; A0A2P1BXV0; V9P785; F8SGM9; R4JB62; A2IBJ9; A8CA05; F8SGM7; A7X9Y0; Q68VI0; F8SGN9; B8Y0L6	1	1757.86	14	NF	NF	H	H	H	NF	H	1.72	2	879.434	-0.44	16.7584
	H	YQQQQPIQQQPQPFPQQPPCSQQQQPPLSQQQQPPF	1xDeamidated [Q]; 1xCarbamidomethyl [C20]	9	48	4	A2IBK1; Q8W3X5; A0A2P1BXV0; V9P785; F8SGM9; A8CA05; F8SGM7; F8SGN9; B8Y0L6	3	4313.05	36	H	NF	NF	NF	NF	NF	NF	1.09	3	1438.36	6.67	24.9959
	H	YQQQQPIQQQPQPFPQQPPCSQQQQPPLSQQQQPPF	2xDeamidated [Q]; 1xCarbamidomethyl [C20]	9	48	3	A2IBK1; Q8W3X5; A0A2P1BXV0; V9P785; F8SGM9; A8CA05; F8SGM7; F8SGN9; B8Y0L6	3	4314.03	36	NF	NF	NF	NF	H	H	NF	1.15	3	1438.7	9.47	25.1866
TRUE	Master Protein	Q3YB17	LMW-glutenin G177-7 OS=Thinopyrum ponticum x Triticum aestivum OX=222994 PE=4 SV=1	51.4658	25	963	1	1	307	34.8	8.41	H	H	H	H	H	H	H	868.89	25
	Confidence	Sequence	Modifications	# Protein Groups	# Proteins	# PSMs	Master Protein Accessions	# Missed Cleavages	Theo. MH+ [Da]	Sequence Length	Found in Sample Group: 1_AG38Duetto	Found in Sample Group: 5_AG167PI	Found in Sample Group: S_Semola	Found in Sample Group: 4_AG77Neolatino	Found in Sample Group: 3_AG69Lloyd	Found in Sample Group: SI_SemolaIntegrale	Found in Sample Group: 2_AG33Colosseo	XCorr Sequest HT	Charge Sequest HT	m/z [Da] Sequest HT	DeltaM [ppm] Sequest HT	RT [min] Sequest HT
	H	ARSQML		49	270	7	D0F0C5; J9QEK9; D0ES12; B2LWZ2; G0YLZ2; G9AYK6; A0A2P1BXV0; B5A810; C8CCM7; Q6J6V0; R4JFH5; A0A346R8U1; R4JAP5; A9YWM3; D3U329; P93794; J9QFV1; C6K8R8; A0A287EIZ3; F5A7G7; B5A816; Q84NE4; A0A2R4Q9T1; A0A346R8U2; F6KHQ0; R4JB62; D0ES19; B5A813; F1C940; A0A0U3AIG6; Q5XXZ9; D5FPE9; Q9XGF0; A8CA05; Q3YB17; B2LWZ6; A0A346R8T9; Q84U16; T1LG74; A0A346R8T7; A0A2R4Q9V4; A0A346R8T6; A0A089VKK4; Q2L990; A0A…	0	705.371	6	H	NF	H	H	H	H	H	1.23	1	705.37	-1.74	3.2777
	H	GQCVSQPQQQSQQQL	1xCarbamidomethyl [C3]	29	250	20	Q5PU42; D0F0C5; K7WV80; A0A3G3C4J5; Q1ZZT4; A0A165R8I1; C8CCM2; D0ES12; R9XVA5; H6VLQ1; C8CCM7; R4JFH5; A2IBV5; Q0PW08; Q8W3W8; R4JDM1; Q5MFK8; K0I5W1; A0A0U3AGE0; F1C940; H6VLQ3; Q9XGF0; Q3YB17; Q3YB18; Q5MFH4; T1LG74; A0A346R8T7; A0A2R4Q9V4; Q8W3X0	0	1743.81	15	H	NF	H	H	H	H	H	2.8	2	872.408	0.44	5.8298
	H	GQQPQQQQL		29	250	39	D0F0C5; K7WV80; A0A3G3C4J5; A0A165R8I1; D0ES12; R9XVA5; A0A0A0R2J7; G9AYK6; X2J8E3; R4JFH5; P93794; Q84NE4; R4JDM1; Q5MFK8; Q2PQJ6; A0A346R8U2; D0ES19; F1C940; Q9XGF0; Q3YB17; Q5MFH4; T1LG74; A0A346R8T7; A0A2R4Q9V4; A0A089VKK4; Q2L990; A0A0A0QYP7; B8XU51; B2LX00	0	1054.53	9	H	H	H	H	H	H	H	2.05	1	1054.53	-0.47	3.9132
	H	GVGTGVGA		51	250	18	Q5PU42; D0F0C5; K7WV80; A0A3G3C4J5; Q1ZZT4; A0A165R8I1; B8XU59; P93792; D0PX24; C6K8R4; D0ES12; B2LWZ2; G9AYK6; H6VLQ1; I3QPG3; Q8W3V8; B5A810; F4YT76; R4JFH5; A0A346R8U1; D2DII6; Q0PW08; F5A7G7; B5A816; I3QPG6; A0A346R8U2; Q41547; H9XH00; Q84U17; A0A0U3AGE0; B5A813; F1C940; Q5XXZ9; K7XED4; D7RFI1; F8SGM2; R4JD66; I3QPG4; Q9XGF0; Q8H0J4; Q3YB17; B2LWZ6; A0A346R8T9; K7XED9; Q6B780; T1LG74; A0A346R…	0	617.325	8	H	H	H	H	H	H	H	2.13	1	617.325	-0.69	3.6119
	H	GVGTGVGAY		51	250	8	Q5PU42; D0F0C5; K7WV80; A0A3G3C4J5; Q1ZZT4; A0A165R8I1; B8XU59; P93792; D0PX24; C6K8R4; D0ES12; B2LWZ2; G9AYK6; H6VLQ1; I3QPG3; Q8W3V8; B5A810; F4YT76; R4JFH5; A0A346R8U1; D2DII6; Q0PW08; F5A7G7; B5A816; I3QPG6; A0A346R8U2; Q41547; H9XH00; Q84U17; A0A0U3AGE0; B5A813; F1C940; Q5XXZ9; K7XED4; D7RFI1; F8SGM2; R4JD66; I3QPG4; Q9XGF0; Q8H0J4; Q3YB17; B2LWZ6; A0A346R8T9; K7XED9; Q6B780; T1LG74; A0A346R…	0	780.389	9	H	NF	H	H	H	NF	NF	1.63	1	780.388	-0.51	10.1166
	H	LQPHQLAQL		53	256	324	D0F0C5; K7WV80; A9YRN9; C6K8R4; A0A287EFH8; D0ES12; B2LWZ2; G0YLZ2; G9AYK6; A0A2P1BXV0; Q670S2; B5A810; C8CCM7; Q6J6V0; R4JAP5; A9YWM3; D3U329; P93794; J9QFV1; C6K8R8; A0A287EIZ3; F5A7G7; B5A816; Q84NE4; A0A2R4Q9T1; A0A346R8U2; F6KHQ0; Q40026; R4JB62; Q84U17; B5A813; F1C940; A0A0U3AIG6; Q5XXZ9; C8CCM8; D5FPE9; Q9XGF0; A0A287EFG2; A8CA05; Q3YB17; B2LWZ6; A0A346R8T9; Q84U16; A0A346R8T7; A0A2R4Q9V4;…	2	1047.59	9	H	H	H	H	H	H	H	2.76	2	524.301	1.03	10.8766
	H	QPHQLAQL		53	256	14	D0F0C5; K7WV80; A9YRN9; C6K8R4; A0A287EFH8; D0ES12; B2LWZ2; G0YLZ2; G9AYK6; A0A2P1BXV0; Q670S2; B5A810; C8CCM7; Q6J6V0; R4JAP5; A9YWM3; D3U329; P93794; J9QFV1; C6K8R8; A0A287EIZ3; F5A7G7; B5A816; Q84NE4; A0A2R4Q9T1; A0A346R8U2; F6KHQ0; Q40026; R4JB62; Q84U17; B5A813; F1C940; A0A0U3AIG6; Q5XXZ9; C8CCM8; D5FPE9; Q9XGF0; A0A287EFG2; A8CA05; Q3YB17; B2LWZ6; A0A346R8T9; Q84U16; A0A346R8T7; A0A2R4Q9V4;…	1	934.51	8	H	NF	H	H	H	H	H	1.53	2	467.759	0.32	5.8896
	H	QQLNPCKVF	1xCarbamidomethyl [C6]	46	251	287	D0F0C5; K7WV80; N1R0S5; K7WV72; G0YLZ2; G9AYK6; A0A2P1BXV0; I3QPG3; A0A346R8U0; Q6J6V0; R4JFH5; A0A346R8U1; R4JAP5; Q6J6U9; A0A2R4Q9T7; D3U329; R4JFK3; P93794; C6K8R8; A0A287EIZ3; B5A816; Q84NE4; I3QPH1; A0A2R4Q9T1; A0A346R8U2; Q40026; R4JB62; A0A0U3AIG6; D7RFI1; R4JD66; A0A2R4Q9U1; A0A2R4Q9S8; Q9XGF0; A8CA05; Q3YB17; B2LWZ6; A0A346R8T7; A0A2R4Q9V4; A0A346R8T6; A0A089VKK4; A8IEC6; A0A2R4Q9S5; B2L…	1	1133.58	9	H	H	H	H	H	H	H	2.56	2	567.292	0.33	14.0594
	H	QQLNPCKVF	1xGln->pyro-Glu [N-Term]; 1xCarbamidomethyl [C6]	46	250	108	D0F0C5; K7WV80; N1R0S5; K7WV72; G0YLZ2; G9AYK6; A0A2P1BXV0; I3QPG3; A0A346R8U0; Q6J6V0; R4JFH5; A0A346R8U1; R4JAP5; Q6J6U9; A0A2R4Q9T7; D3U329; R4JFK3; P93794; C6K8R8; A0A287EIZ3; B5A816; Q84NE4; I3QPH1; A0A2R4Q9T1; A0A346R8U2; Q40026; R4JB62; A0A0U3AIG6; D7RFI1; R4JD66; A0A2R4Q9U1; A0A2R4Q9S8; Q9XGF0; A8CA05; Q3YB17; B2LWZ6; A0A346R8T7; A0A2R4Q9V4; A0A346R8T6; A0A089VKK4; A8IEC6; A0A2R4Q9S5; B2L…	1	1116.55	9	H	H	H	H	H	H	H	1.47	1	1116.55	0.02	23.8566
	H	QQQCCQQL	2xCarbamidomethyl [C4; C5]	66	374	29	D0F0C5; M7ZW11; K7WV80; N1R0S5; B6UKM2; C6K8R4; A0A287EFH8; D0ES12; Q84M19; E5FF15; W8E194; A0A0N7A5G3; I3QPG3; A0A0K2GSM3; W8E1A2; K7WZA8; P06471; Q6J6V0; R4JFH5; F5A7G9; R4JAP5; H8Y0E0; Q6J6U9; D3U329; A0A024A3B7; R4JFK3; P93794; E3UTY1; Q0PIV6; W8E6H6; A0A287EIZ3; A0A0K2GRS0; H8Y0M0; A0A0N7A547; I3QPH1; A0A2R4Q9T1; C5MQZ6; Q40026; A0A0N7A503; B6UKR2; B6UKQ9; W8E6G7; E5FF35; K7XED4; A0A0N7A522;…	0	1092.46	8	H	H	H	H	H	H	H	1.53	1	1092.45	-1.04	3.8792
	H	TSLAL		50	1284	464	D0F0C5; K7WV80; N1R0S5; K7WV72; A0A0A9RWM6; D0ES12; M7Z8V3; G9AYK6; A0A368QQ96; A0A2P1BXV0; Q670S2; I1ILT7; A0A0Q3GGG2; Q6J6V0; R4JFH5; A0A287GA23; R4JAP5; J3M5K7; Q6J6U9; A0A2R4Q9T7; M8AHS2; A0A0E0MHA4; D3U329; A0A1E5W740; F2DFY3; B5A816; Q84NE4; A0A0D9ZSX2; M0Y530; A0A0E0JEE4; A0A2R4Q9T1; A0A0D9UX31; R4JB62; A0A0E0L7K0; A0A0E0PGE1; R4JD66; A0A1Z5R643; A0A0E0JER3; A0A2R4Q9U1; A0A2R4Q9S8; Q9XGF0;…	1	504.303	5	H	H	H	H	H	H	H	1.74	1	504.303	-0.29	13.2342
TRUE	Master Protein	K7WV80	Low molecular weight glutenin subunit OS=Aegilops tauschii OX=37682 GN=glu-3 PE=4 SV=1	56.7568	27	995	1	1	296	33.6	8.34	H	H	H	H	H	H	H	866.36	27
	Confidence	Sequence	Modifications	# Protein Groups	# Proteins	# PSMs	Master Protein Accessions	# Missed Cleavages	Theo. MH+ [Da]	Sequence Length	Found in Sample Group: 1_AG38Duetto	Found in Sample Group: 5_AG167PI	Found in Sample Group: S_Semola	Found in Sample Group: 4_AG77Neolatino	Found in Sample Group: 3_AG69Lloyd	Found in Sample Group: SI_SemolaIntegrale	Found in Sample Group: 2_AG33Colosseo	XCorr Sequest HT	Charge Sequest HT	m/z [Da] Sequest HT	DeltaM [ppm] Sequest HT	RT [min] Sequest HT
	H	GQCVSQPQQQSQQQL	1xCarbamidomethyl [C3]	29	250	20	Q5PU42; D0F0C5; K7WV80; A0A3G3C4J5; Q1ZZT4; A0A165R8I1; C8CCM2; D0ES12; R9XVA5; H6VLQ1; C8CCM7; R4JFH5; A2IBV5; Q0PW08; Q8W3W8; R4JDM1; Q5MFK8; K0I5W1; A0A0U3AGE0; F1C940; H6VLQ3; Q9XGF0; Q3YB17; Q3YB18; Q5MFH4; T1LG74; A0A346R8T7; A0A2R4Q9V4; Q8W3X0	0	1743.81	15	H	NF	H	H	H	H	H	2.8	2	872.408	0.44	5.8298
	H	GQQPQQQQL		29	250	39	D0F0C5; K7WV80; A0A3G3C4J5; A0A165R8I1; D0ES12; R9XVA5; A0A0A0R2J7; G9AYK6; X2J8E3; R4JFH5; P93794; Q84NE4; R4JDM1; Q5MFK8; Q2PQJ6; A0A346R8U2; D0ES19; F1C940; Q9XGF0; Q3YB17; Q5MFH4; T1LG74; A0A346R8T7; A0A2R4Q9V4; A0A089VKK4; Q2L990; A0A0A0QYP7; B8XU51; B2LX00	0	1054.53	9	H	H	H	H	H	H	H	2.05	1	1054.53	-0.47	3.9132
	H	GVGTGVGA		51	250	18	Q5PU42; D0F0C5; K7WV80; A0A3G3C4J5; Q1ZZT4; A0A165R8I1; B8XU59; P93792; D0PX24; C6K8R4; D0ES12; B2LWZ2; G9AYK6; H6VLQ1; I3QPG3; Q8W3V8; B5A810; F4YT76; R4JFH5; A0A346R8U1; D2DII6; Q0PW08; F5A7G7; B5A816; I3QPG6; A0A346R8U2; Q41547; H9XH00; Q84U17; A0A0U3AGE0; B5A813; F1C940; Q5XXZ9; K7XED4; D7RFI1; F8SGM2; R4JD66; I3QPG4; Q9XGF0; Q8H0J4; Q3YB17; B2LWZ6; A0A346R8T9; K7XED9; Q6B780; T1LG74; A0A346R…	0	617.325	8	H	H	H	H	H	H	H	2.13	1	617.325	-0.69	3.6119
	H	GVGTGVGAY		51	250	8	Q5PU42; D0F0C5; K7WV80; A0A3G3C4J5; Q1ZZT4; A0A165R8I1; B8XU59; P93792; D0PX24; C6K8R4; D0ES12; B2LWZ2; G9AYK6; H6VLQ1; I3QPG3; Q8W3V8; B5A810; F4YT76; R4JFH5; A0A346R8U1; D2DII6; Q0PW08; F5A7G7; B5A816; I3QPG6; A0A346R8U2; Q41547; H9XH00; Q84U17; A0A0U3AGE0; B5A813; F1C940; Q5XXZ9; K7XED4; D7RFI1; F8SGM2; R4JD66; I3QPG4; Q9XGF0; Q8H0J4; Q3YB17; B2LWZ6; A0A346R8T9; K7XED9; Q6B780; T1LG74; A0A346R…	0	780.389	9	H	NF	H	H	H	NF	NF	1.63	1	780.388	-0.51	10.1166
	H	LQPHQLAQL		53	256	324	D0F0C5; K7WV80; A9YRN9; C6K8R4; A0A287EFH8; D0ES12; B2LWZ2; G0YLZ2; G9AYK6; A0A2P1BXV0; Q670S2; B5A810; C8CCM7; Q6J6V0; R4JAP5; A9YWM3; D3U329; P93794; J9QFV1; C6K8R8; A0A287EIZ3; F5A7G7; B5A816; Q84NE4; A0A2R4Q9T1; A0A346R8U2; F6KHQ0; Q40026; R4JB62; Q84U17; B5A813; F1C940; A0A0U3AIG6; Q5XXZ9; C8CCM8; D5FPE9; Q9XGF0; A0A287EFG2; A8CA05; Q3YB17; B2LWZ6; A0A346R8T9; Q84U16; A0A346R8T7; A0A2R4Q9V4;…	2	1047.59	9	H	H	H	H	H	H	H	2.76	2	524.301	1.03	10.8766
	H	QPHQLAQL		53	256	14	D0F0C5; K7WV80; A9YRN9; C6K8R4; A0A287EFH8; D0ES12; B2LWZ2; G0YLZ2; G9AYK6; A0A2P1BXV0; Q670S2; B5A810; C8CCM7; Q6J6V0; R4JAP5; A9YWM3; D3U329; P93794; J9QFV1; C6K8R8; A0A287EIZ3; F5A7G7; B5A816; Q84NE4; A0A2R4Q9T1; A0A346R8U2; F6KHQ0; Q40026; R4JB62; Q84U17; B5A813; F1C940; A0A0U3AIG6; Q5XXZ9; C8CCM8; D5FPE9; Q9XGF0; A0A287EFG2; A8CA05; Q3YB17; B2LWZ6; A0A346R8T9; Q84U16; A0A346R8T7; A0A2R4Q9V4;…	1	934.51	8	H	NF	H	H	H	H	H	1.53	2	467.759	0.32	5.8896
	H	QQLNPCKVF	1xCarbamidomethyl [C6]	46	251	287	D0F0C5; K7WV80; N1R0S5; K7WV72; G0YLZ2; G9AYK6; A0A2P1BXV0; I3QPG3; A0A346R8U0; Q6J6V0; R4JFH5; A0A346R8U1; R4JAP5; Q6J6U9; A0A2R4Q9T7; D3U329; R4JFK3; P93794; C6K8R8; A0A287EIZ3; B5A816; Q84NE4; I3QPH1; A0A2R4Q9T1; A0A346R8U2; Q40026; R4JB62; A0A0U3AIG6; D7RFI1; R4JD66; A0A2R4Q9U1; A0A2R4Q9S8; Q9XGF0; A8CA05; Q3YB17; B2LWZ6; A0A346R8T7; A0A2R4Q9V4; A0A346R8T6; A0A089VKK4; A8IEC6; A0A2R4Q9S5; B2L…	1	1133.58	9	H	H	H	H	H	H	H	2.56	2	567.292	0.33	14.0594
	H	QQLNPCKVF	1xGln->pyro-Glu [N-Term]; 1xCarbamidomethyl [C6]	46	250	108	D0F0C5; K7WV80; N1R0S5; K7WV72; G0YLZ2; G9AYK6; A0A2P1BXV0; I3QPG3; A0A346R8U0; Q6J6V0; R4JFH5; A0A346R8U1; R4JAP5; Q6J6U9; A0A2R4Q9T7; D3U329; R4JFK3; P93794; C6K8R8; A0A287EIZ3; B5A816; Q84NE4; I3QPH1; A0A2R4Q9T1; A0A346R8U2; Q40026; R4JB62; A0A0U3AIG6; D7RFI1; R4JD66; A0A2R4Q9U1; A0A2R4Q9S8; Q9XGF0; A8CA05; Q3YB17; B2LWZ6; A0A346R8T7; A0A2R4Q9V4; A0A346R8T6; A0A089VKK4; A8IEC6; A0A2R4Q9S5; B2L…	1	1116.55	9	H	H	H	H	H	H	H	1.47	1	1116.55	0.02	23.8566
	H	QQQCCQQL	2xCarbamidomethyl [C4; C5]	66	374	29	D0F0C5; M7ZW11; K7WV80; N1R0S5; B6UKM2; C6K8R4; A0A287EFH8; D0ES12; Q84M19; E5FF15; W8E194; A0A0N7A5G3; I3QPG3; A0A0K2GSM3; W8E1A2; K7WZA8; P06471; Q6J6V0; R4JFH5; F5A7G9; R4JAP5; H8Y0E0; Q6J6U9; D3U329; A0A024A3B7; R4JFK3; P93794; E3UTY1; Q0PIV6; W8E6H6; A0A287EIZ3; A0A0K2GRS0; H8Y0M0; A0A0N7A547; I3QPH1; A0A2R4Q9T1; C5MQZ6; Q40026; A0A0N7A503; B6UKR2; B6UKQ9; W8E6G7; E5FF35; K7XED4; A0A0N7A522;…	0	1092.46	8	H	H	H	H	H	H	H	1.53	1	1092.45	-1.04	3.8792
	H	QQQIPIVQPSVL		5	121	10	K7WV80; K7WV72; P93792; D0PX24; I3QPH4; I3QPG3; A5JJ45; I3QPG6; A0A0N9LF97; Q41547; H9XH00; D4HNC3; K7XED4; D7RFI1; F8SGM2; I3QPG4; C6KI73; A0A068F9M3	0	1349.78	12	NF	NF	H	H	NF	H	NF	2.75	2	675.392	-0.9	26.3882
	H	SQQQPPF		36	253	26	K7WV80; A0A3G3C4J5; K7WV72; B8XU59; P93792; Q8W3X5; A0A2P1BXV0; Q8W3V8; C8CCM7; Q6J6V0; R4JAP5; A9YWM3; D2DII6; D3U329; R4JFK3; R4JDM1; Q5MFK8; I3QPH1; A0A2R4Q9T1; A0A346R8U2; R4JB62; F1C940; A0A0U3AIG6; Q41552; K7XED4; D7RFI1; C8CCM8; F8SGM2; R4JD66; D5FPE9; A8CA05; A0A346R8T9; Q6B780; A0A2R4Q9V4; B2LX00; C6KI73	0	831.4	7	H	H	H	H	H	H	H	1.48	1	831.399	-1.26	10.1053
	H	TSLAL		50	1284	464	D0F0C5; K7WV80; N1R0S5; K7WV72; A0A0A9RWM6; D0ES12; M7Z8V3; G9AYK6; A0A368QQ96; A0A2P1BXV0; Q670S2; I1ILT7; A0A0Q3GGG2; Q6J6V0; R4JFH5; A0A287GA23; R4JAP5; J3M5K7; Q6J6U9; A0A2R4Q9T7; M8AHS2; A0A0E0MHA4; D3U329; A0A1E5W740; F2DFY3; B5A816; Q84NE4; A0A0D9ZSX2; M0Y530; A0A0E0JEE4; A0A2R4Q9T1; A0A0D9UX31; R4JB62; A0A0E0L7K0; A0A0E0PGE1; R4JD66; A0A1Z5R643; A0A0E0JER3; A0A2R4Q9U1; A0A2R4Q9S8; Q9XGF0;…	1	504.303	5	H	H	H	H	H	H	H	1.74	1	504.303	-0.29	13.2342
TRUE	Master Protein	A0A2R4Q9V4	Low-molecular-weight glutenin subunit OS=Aegilops tauschii OX=37682 GN=LMW-GS PE=4 SV=1	61.5385	28	995	1	1	299	34	8.34	H	H	H	H	H	H	H	861.63	28
	Confidence	Sequence	Modifications	# Protein Groups	# Proteins	# PSMs	Master Protein Accessions	# Missed Cleavages	Theo. MH+ [Da]	Sequence Length	Found in Sample Group: 1_AG38Duetto	Found in Sample Group: 5_AG167PI	Found in Sample Group: S_Semola	Found in Sample Group: 4_AG77Neolatino	Found in Sample Group: 3_AG69Lloyd	Found in Sample Group: SI_SemolaIntegrale	Found in Sample Group: 2_AG33Colosseo	XCorr Sequest HT	Charge Sequest HT	m/z [Da] Sequest HT	DeltaM [ppm] Sequest HT	RT [min] Sequest HT
	H	ARSQML		49	270	7	D0F0C5; J9QEK9; D0ES12; B2LWZ2; G0YLZ2; G9AYK6; A0A2P1BXV0; B5A810; C8CCM7; Q6J6V0; R4JFH5; A0A346R8U1; R4JAP5; A9YWM3; D3U329; P93794; J9QFV1; C6K8R8; A0A287EIZ3; F5A7G7; B5A816; Q84NE4; A0A2R4Q9T1; A0A346R8U2; F6KHQ0; R4JB62; D0ES19; B5A813; F1C940; A0A0U3AIG6; Q5XXZ9; D5FPE9; Q9XGF0; A8CA05; Q3YB17; B2LWZ6; A0A346R8T9; Q84U16; T1LG74; A0A346R8T7; A0A2R4Q9V4; A0A346R8T6; A0A089VKK4; Q2L990; A0A…	0	705.371	6	H	NF	H	H	H	H	H	1.23	1	705.37	-1.74	3.2777
	H	GQCVSQPQQQSQQQL	1xCarbamidomethyl [C3]	29	250	20	Q5PU42; D0F0C5; K7WV80; A0A3G3C4J5; Q1ZZT4; A0A165R8I1; C8CCM2; D0ES12; R9XVA5; H6VLQ1; C8CCM7; R4JFH5; A2IBV5; Q0PW08; Q8W3W8; R4JDM1; Q5MFK8; K0I5W1; A0A0U3AGE0; F1C940; H6VLQ3; Q9XGF0; Q3YB17; Q3YB18; Q5MFH4; T1LG74; A0A346R8T7; A0A2R4Q9V4; Q8W3X0	0	1743.81	15	H	NF	H	H	H	H	H	2.8	2	872.408	0.44	5.8298
	H	GQQPQQQQL		29	250	39	D0F0C5; K7WV80; A0A3G3C4J5; A0A165R8I1; D0ES12; R9XVA5; A0A0A0R2J7; G9AYK6; X2J8E3; R4JFH5; P93794; Q84NE4; R4JDM1; Q5MFK8; Q2PQJ6; A0A346R8U2; D0ES19; F1C940; Q9XGF0; Q3YB17; Q5MFH4; T1LG74; A0A346R8T7; A0A2R4Q9V4; A0A089VKK4; Q2L990; A0A0A0QYP7; B8XU51; B2LX00	0	1054.53	9	H	H	H	H	H	H	H	2.05	1	1054.53	-0.47	3.9132
	H	LQPHQLAQL		53	256	324	D0F0C5; K7WV80; A9YRN9; C6K8R4; A0A287EFH8; D0ES12; B2LWZ2; G0YLZ2; G9AYK6; A0A2P1BXV0; Q670S2; B5A810; C8CCM7; Q6J6V0; R4JAP5; A9YWM3; D3U329; P93794; J9QFV1; C6K8R8; A0A287EIZ3; F5A7G7; B5A816; Q84NE4; A0A2R4Q9T1; A0A346R8U2; F6KHQ0; Q40026; R4JB62; Q84U17; B5A813; F1C940; A0A0U3AIG6; Q5XXZ9; C8CCM8; D5FPE9; Q9XGF0; A0A287EFG2; A8CA05; Q3YB17; B2LWZ6; A0A346R8T9; Q84U16; A0A346R8T7; A0A2R4Q9V4;…	2	1047.59	9	H	H	H	H	H	H	H	2.76	2	524.301	1.03	10.8766
	H	QPHQLAQL		53	256	14	D0F0C5; K7WV80; A9YRN9; C6K8R4; A0A287EFH8; D0ES12; B2LWZ2; G0YLZ2; G9AYK6; A0A2P1BXV0; Q670S2; B5A810; C8CCM7; Q6J6V0; R4JAP5; A9YWM3; D3U329; P93794; J9QFV1; C6K8R8; A0A287EIZ3; F5A7G7; B5A816; Q84NE4; A0A2R4Q9T1; A0A346R8U2; F6KHQ0; Q40026; R4JB62; Q84U17; B5A813; F1C940; A0A0U3AIG6; Q5XXZ9; C8CCM8; D5FPE9; Q9XGF0; A0A287EFG2; A8CA05; Q3YB17; B2LWZ6; A0A346R8T9; Q84U16; A0A346R8T7; A0A2R4Q9V4;…	1	934.51	8	H	NF	H	H	H	H	H	1.53	2	467.759	0.32	5.8896
	H	QQLNPCKVF	1xCarbamidomethyl [C6]	46	251	287	D0F0C5; K7WV80; N1R0S5; K7WV72; G0YLZ2; G9AYK6; A0A2P1BXV0; I3QPG3; A0A346R8U0; Q6J6V0; R4JFH5; A0A346R8U1; R4JAP5; Q6J6U9; A0A2R4Q9T7; D3U329; R4JFK3; P93794; C6K8R8; A0A287EIZ3; B5A816; Q84NE4; I3QPH1; A0A2R4Q9T1; A0A346R8U2; Q40026; R4JB62; A0A0U3AIG6; D7RFI1; R4JD66; A0A2R4Q9U1; A0A2R4Q9S8; Q9XGF0; A8CA05; Q3YB17; B2LWZ6; A0A346R8T7; A0A2R4Q9V4; A0A346R8T6; A0A089VKK4; A8IEC6; A0A2R4Q9S5; B2L…	1	1133.58	9	H	H	H	H	H	H	H	2.56	2	567.292	0.33	14.0594
	H	QQLNPCKVF	1xGln->pyro-Glu [N-Term]; 1xCarbamidomethyl [C6]	46	250	108	D0F0C5; K7WV80; N1R0S5; K7WV72; G0YLZ2; G9AYK6; A0A2P1BXV0; I3QPG3; A0A346R8U0; Q6J6V0; R4JFH5; A0A346R8U1; R4JAP5; Q6J6U9; A0A2R4Q9T7; D3U329; R4JFK3; P93794; C6K8R8; A0A287EIZ3; B5A816; Q84NE4; I3QPH1; A0A2R4Q9T1; A0A346R8U2; Q40026; R4JB62; A0A0U3AIG6; D7RFI1; R4JD66; A0A2R4Q9U1; A0A2R4Q9S8; Q9XGF0; A8CA05; Q3YB17; B2LWZ6; A0A346R8T7; A0A2R4Q9V4; A0A346R8T6; A0A089VKK4; A8IEC6; A0A2R4Q9S5; B2L…	1	1116.55	9	H	H	H	H	H	H	H	1.47	1	1116.55	0.02	23.8566
	H	QQQCCQQL	2xCarbamidomethyl [C4; C5]	66	374	29	D0F0C5; M7ZW11; K7WV80; N1R0S5; B6UKM2; C6K8R4; A0A287EFH8; D0ES12; Q84M19; E5FF15; W8E194; A0A0N7A5G3; I3QPG3; A0A0K2GSM3; W8E1A2; K7WZA8; P06471; Q6J6V0; R4JFH5; F5A7G9; R4JAP5; H8Y0E0; Q6J6U9; D3U329; A0A024A3B7; R4JFK3; P93794; E3UTY1; Q0PIV6; W8E6H6; A0A287EIZ3; A0A0K2GRS0; H8Y0M0; A0A0N7A547; I3QPH1; A0A2R4Q9T1; C5MQZ6; Q40026; A0A0N7A503; B6UKR2; B6UKQ9; W8E6G7; E5FF35; K7XED4; A0A0N7A522;…	0	1092.46	8	H	H	H	H	H	H	H	1.53	1	1092.45	-1.04	3.8792
	H	QQQPPFSQQQPILPQQPPF	2xDeamidated [Q15; Q]	12	146	5	H6VLQ1; Q0PW08; Q7X9J9; Q5MFL6; A0A346R8U2; Q5MFN6; H6VLQ3; A2IBV2; Q3YB18; A0A2R4Q9V4; Q5PU41; B2LX00	2	2235.11	19	NF	NF	NF	NF	H	NF	H	1.54	2	1118.06	2.9	20.8784
	H	SQQQPPF		36	253	26	K7WV80; A0A3G3C4J5; K7WV72; B8XU59; P93792; Q8W3X5; A0A2P1BXV0; Q8W3V8; C8CCM7; Q6J6V0; R4JAP5; A9YWM3; D2DII6; D3U329; R4JFK3; R4JDM1; Q5MFK8; I3QPH1; A0A2R4Q9T1; A0A346R8U2; R4JB62; F1C940; A0A0U3AIG6; Q41552; K7XED4; D7RFI1; C8CCM8; F8SGM2; R4JD66; D5FPE9; A8CA05; A0A346R8T9; Q6B780; A0A2R4Q9V4; B2LX00; C6KI73	0	831.4	7	H	H	H	H	H	H	H	1.48	1	831.399	-1.26	10.1053
	H	TSLAL		50	1284	464	D0F0C5; K7WV80; N1R0S5; K7WV72; A0A0A9RWM6; D0ES12; M7Z8V3; G9AYK6; A0A368QQ96; A0A2P1BXV0; Q670S2; I1ILT7; A0A0Q3GGG2; Q6J6V0; R4JFH5; A0A287GA23; R4JAP5; J3M5K7; Q6J6U9; A0A2R4Q9T7; M8AHS2; A0A0E0MHA4; D3U329; A0A1E5W740; F2DFY3; B5A816; Q84NE4; A0A0D9ZSX2; M0Y530; A0A0E0JEE4; A0A2R4Q9T1; A0A0D9UX31; R4JB62; A0A0E0L7K0; A0A0E0PGE1; R4JD66; A0A1Z5R643; A0A0E0JER3; A0A2R4Q9U1; A0A2R4Q9S8; Q9XGF0;…	1	504.303	5	H	H	H	H	H	H	H	1.74	1	504.303	-0.29	13.2342
TRUE	Master Protein	A0A346R8T7	Low molecular weight glutenin subunit I1 OS=Aegilops comosa OX=4485 GN=LMW-I1 PE=4 SV=1	59.2466	27	1096	4	1	292	33.3	8.91	H	H	H	H	H	H	H	859.94	27
	Confidence	Sequence	Modifications	# Protein Groups	# Proteins	# PSMs	Master Protein Accessions	# Missed Cleavages	Theo. MH+ [Da]	Sequence Length	Found in Sample Group: 1_AG38Duetto	Found in Sample Group: 5_AG167PI	Found in Sample Group: S_Semola	Found in Sample Group: 4_AG77Neolatino	Found in Sample Group: 3_AG69Lloyd	Found in Sample Group: SI_SemolaIntegrale	Found in Sample Group: 2_AG33Colosseo	XCorr Sequest HT	Charge Sequest HT	m/z [Da] Sequest HT	DeltaM [ppm] Sequest HT	RT [min] Sequest HT
	H	ARSQML		49	270	7	D0F0C5; J9QEK9; D0ES12; B2LWZ2; G0YLZ2; G9AYK6; A0A2P1BXV0; B5A810; C8CCM7; Q6J6V0; R4JFH5; A0A346R8U1; R4JAP5; A9YWM3; D3U329; P93794; J9QFV1; C6K8R8; A0A287EIZ3; F5A7G7; B5A816; Q84NE4; A0A2R4Q9T1; A0A346R8U2; F6KHQ0; R4JB62; D0ES19; B5A813; F1C940; A0A0U3AIG6; Q5XXZ9; D5FPE9; Q9XGF0; A8CA05; Q3YB17; B2LWZ6; A0A346R8T9; Q84U16; T1LG74; A0A346R8T7; A0A2R4Q9V4; A0A346R8T6; A0A089VKK4; Q2L990; A0A…	0	705.371	6	H	NF	H	H	H	H	H	1.23	1	705.37	-1.74	3.2777
	H	GQCVSQPQQQSQQQL	1xCarbamidomethyl [C3]	29	250	20	Q5PU42; D0F0C5; K7WV80; A0A3G3C4J5; Q1ZZT4; A0A165R8I1; C8CCM2; D0ES12; R9XVA5; H6VLQ1; C8CCM7; R4JFH5; A2IBV5; Q0PW08; Q8W3W8; R4JDM1; Q5MFK8; K0I5W1; A0A0U3AGE0; F1C940; H6VLQ3; Q9XGF0; Q3YB17; Q3YB18; Q5MFH4; T1LG74; A0A346R8T7; A0A2R4Q9V4; Q8W3X0	0	1743.81	15	H	NF	H	H	H	H	H	2.8	2	872.408	0.44	5.8298
	H	GQQPQQQQL		29	250	39	D0F0C5; K7WV80; A0A3G3C4J5; A0A165R8I1; D0ES12; R9XVA5; A0A0A0R2J7; G9AYK6; X2J8E3; R4JFH5; P93794; Q84NE4; R4JDM1; Q5MFK8; Q2PQJ6; A0A346R8U2; D0ES19; F1C940; Q9XGF0; Q3YB17; Q5MFH4; T1LG74; A0A346R8T7; A0A2R4Q9V4; A0A089VKK4; Q2L990; A0A0A0QYP7; B8XU51; B2LX00	0	1054.53	9	H	H	H	H	H	H	H	2.05	1	1054.53	-0.47	3.9132
	H	GVGTGVGA		51	250	18	Q5PU42; D0F0C5; K7WV80; A0A3G3C4J5; Q1ZZT4; A0A165R8I1; B8XU59; P93792; D0PX24; C6K8R4; D0ES12; B2LWZ2; G9AYK6; H6VLQ1; I3QPG3; Q8W3V8; B5A810; F4YT76; R4JFH5; A0A346R8U1; D2DII6; Q0PW08; F5A7G7; B5A816; I3QPG6; A0A346R8U2; Q41547; H9XH00; Q84U17; A0A0U3AGE0; B5A813; F1C940; Q5XXZ9; K7XED4; D7RFI1; F8SGM2; R4JD66; I3QPG4; Q9XGF0; Q8H0J4; Q3YB17; B2LWZ6; A0A346R8T9; K7XED9; Q6B780; T1LG74; A0A346R…	0	617.325	8	H	H	H	H	H	H	H	2.13	1	617.325	-0.69	3.6119
	H	GVGTGVGAY		51	250	8	Q5PU42; D0F0C5; K7WV80; A0A3G3C4J5; Q1ZZT4; A0A165R8I1; B8XU59; P93792; D0PX24; C6K8R4; D0ES12; B2LWZ2; G9AYK6; H6VLQ1; I3QPG3; Q8W3V8; B5A810; F4YT76; R4JFH5; A0A346R8U1; D2DII6; Q0PW08; F5A7G7; B5A816; I3QPG6; A0A346R8U2; Q41547; H9XH00; Q84U17; A0A0U3AGE0; B5A813; F1C940; Q5XXZ9; K7XED4; D7RFI1; F8SGM2; R4JD66; I3QPG4; Q9XGF0; Q8H0J4; Q3YB17; B2LWZ6; A0A346R8T9; K7XED9; Q6B780; T1LG74; A0A346R…	0	780.389	9	H	NF	H	H	H	NF	NF	1.63	1	780.388	-0.51	10.1166
	H	LQPHQLAQL		53	256	324	D0F0C5; K7WV80; A9YRN9; C6K8R4; A0A287EFH8; D0ES12; B2LWZ2; G0YLZ2; G9AYK6; A0A2P1BXV0; Q670S2; B5A810; C8CCM7; Q6J6V0; R4JAP5; A9YWM3; D3U329; P93794; J9QFV1; C6K8R8; A0A287EIZ3; F5A7G7; B5A816; Q84NE4; A0A2R4Q9T1; A0A346R8U2; F6KHQ0; Q40026; R4JB62; Q84U17; B5A813; F1C940; A0A0U3AIG6; Q5XXZ9; C8CCM8; D5FPE9; Q9XGF0; A0A287EFG2; A8CA05; Q3YB17; B2LWZ6; A0A346R8T9; Q84U16; A0A346R8T7; A0A2R4Q9V4;…	2	1047.59	9	H	H	H	H	H	H	H	2.76	2	524.301	1.03	10.8766
	H	LQQQCIPVAM	1xCarbamidomethyl [C5]	28	177	32	Q38L53; I3QPH4; A0A0A0R2J7; G9AYK6; X2J8E3; F1C945; R9XV91; Q5MFH0; Q38L54; R4JFH5; R9XUD0; R9YTM4; P93794; A0A1U9XLA9; C6KI71; Q84NE4; F1C943; Q2PQJ6; X2JAE7; D0ES16; R4JB44; Q6QGW0; T1LG74; A0A346R8T7; A0A089VKK4; K7R468; V9P6N2; Q38L52	4	1187.59	10	H	H	H	H	H	H	H	2.03	2	594.299	-0.94	18.9972
	H	QPHQLAQL		53	256	14	D0F0C5; K7WV80; A9YRN9; C6K8R4; A0A287EFH8; D0ES12; B2LWZ2; G0YLZ2; G9AYK6; A0A2P1BXV0; Q670S2; B5A810; C8CCM7; Q6J6V0; R4JAP5; A9YWM3; D3U329; P93794; J9QFV1; C6K8R8; A0A287EIZ3; F5A7G7; B5A816; Q84NE4; A0A2R4Q9T1; A0A346R8U2; F6KHQ0; Q40026; R4JB62; Q84U17; B5A813; F1C940; A0A0U3AIG6; Q5XXZ9; C8CCM8; D5FPE9; Q9XGF0; A0A287EFG2; A8CA05; Q3YB17; B2LWZ6; A0A346R8T9; Q84U16; A0A346R8T7; A0A2R4Q9V4;…	1	934.51	8	H	NF	H	H	H	H	H	1.53	2	467.759	0.32	5.8896
	H	QQLNPCKVF	1xCarbamidomethyl [C6]	46	251	287	D0F0C5; K7WV80; N1R0S5; K7WV72; G0YLZ2; G9AYK6; A0A2P1BXV0; I3QPG3; A0A346R8U0; Q6J6V0; R4JFH5; A0A346R8U1; R4JAP5; Q6J6U9; A0A2R4Q9T7; D3U329; R4JFK3; P93794; C6K8R8; A0A287EIZ3; B5A816; Q84NE4; I3QPH1; A0A2R4Q9T1; A0A346R8U2; Q40026; R4JB62; A0A0U3AIG6; D7RFI1; R4JD66; A0A2R4Q9U1; A0A2R4Q9S8; Q9XGF0; A8CA05; Q3YB17; B2LWZ6; A0A346R8T7; A0A2R4Q9V4; A0A346R8T6; A0A089VKK4; A8IEC6; A0A2R4Q9S5; B2L…	1	1133.58	9	H	H	H	H	H	H	H	2.56	2	567.292	0.33	14.0594
	H	QQLNPCKVF	1xGln->pyro-Glu [N-Term]; 1xCarbamidomethyl [C6]	46	250	108	D0F0C5; K7WV80; N1R0S5; K7WV72; G0YLZ2; G9AYK6; A0A2P1BXV0; I3QPG3; A0A346R8U0; Q6J6V0; R4JFH5; A0A346R8U1; R4JAP5; Q6J6U9; A0A2R4Q9T7; D3U329; R4JFK3; P93794; C6K8R8; A0A287EIZ3; B5A816; Q84NE4; I3QPH1; A0A2R4Q9T1; A0A346R8U2; Q40026; R4JB62; A0A0U3AIG6; D7RFI1; R4JD66; A0A2R4Q9U1; A0A2R4Q9S8; Q9XGF0; A8CA05; Q3YB17; B2LWZ6; A0A346R8T7; A0A2R4Q9V4; A0A346R8T6; A0A089VKK4; A8IEC6; A0A2R4Q9S5; B2L…	1	1116.55	9	H	H	H	H	H	H	H	1.47	1	1116.55	0.02	23.8566
	H	RQIPQQSRHESIRAIIY	1xDeamidated [Q5]	1	4	116	A0A346R8T7	0	2096.14	17	NF	H	H	H	H	H	NF	2.7	4	524.789	-0.61	13.4089
	H	RTLPTM		48	251	45	D0F0C5; N1R0S5; K7WV72; J9QEK9; A9YRN9; C6K8R4; G0YLZ2; A0A2P1BXV0; W8E197; W8E194; I3QPG3; W8E1A2; B5A810; C8CCM7; R4JFH5; Q5XXZ7; R4JAP5; A9YWM3; Q6J6U9; A0A2R4Q9T7; J9QFV1; W8E6H6; H8Y0M0; B5A816; W8E2L7; F6KHQ0; R4JB62; W8E6G7; B5A813; K7XED4; D7RFI1; C8CCM8; W8E0F4; A0A2R4Q9U1; A0A2R4Q9S8; W8E5R1; Q9XGF0; A8CA05; Q84U16; Q6B780; A0A346R8T7; A8IEC6; A0A0K2GRQ1; A0A2R4Q9S5; B6UKQ7; X2JC88; A8I…	1	718.392	6	H	H	H	H	H	H	H	1.27	1	718.39	-2.41	5.4248
	H	RTLPTMCSVNVPLY	1xCarbamidomethyl [C7]	44	250	5	K7WV72; I3XHQ0; J9QEK9; B8XU59; P93792; D0PX24; A9YRN9; C6K8R4; H9XGZ9; A0A0A0R2J7; X2J8E3; I3QPG3; Q8W3V8; D0F0C4; B5A810; F4YT76; P06471; Q5XXZ7; A0A1U9XLA9; B5A816; I3QPG6; A0A1G4P206; F6KHQ0; Q41547; X2JAE7; B5A813; K7XED4; D7RFI1; F8SGM2; I3QPG4; A0A2R4Q9S8; A0A287EFG2; Q8H0J4; F6M7E1; I6TMW4; Q84U16; K7XED9; Q6B780; A0A346R8T7; A8IEC6; Q5PU41; I6SW30; A0A068F9M3; A8IEB4	2	1650.83	14	NF	NF	H	NF	H	NF	NF	1.35	2	825.92	-0.99	23.6908
	H	SQQQQPPF		42	254	83	N1R0S5; A0A165R8I1; A9YRN9; B2LWZ2; A0A0A0R2J7; G9AYK6; A0A2P1BXV0; B5A810; C8CCM7; Q6J6V0; R4JFH5; Q5XXZ7; A9YWM3; Q6J6U9; A0A2R4Q9T7; D3U329; P93794; A0A0A0R2I8; B5A816; Q84NE4; A0A2R4Q9T1; Q2PQJ6; D0ES19; B5A813; A0A0U3AIG6; C8CCM8; D5FPE9; A0A2R4Q9U1; Q9XGF0; A8CA05; B2LWZ6; A0A346R8T9; Q84U16; T1LG74; A0A346R8T7; A0A346R8T6; A0A089VKK4; Q2L990; A0A0A0QYP7; A0A2R4Q9S5; B8XU51; X2JC88	0	959.458	8	H	H	H	H	H	H	H	2.1	2	480.233	-0.32	10.2887
	H	SQQQQSPF		27	170	15	A0A0A0R2J7; G9AYK6; X2J8E3; F1C945; Q5MFH0; Q38L54; R9XUD0; A5JJ45; A0A0A0R2I8; A0A1U9XLA9; Q84NE4; F1C943; A0A1G4P206; X2JAE7; D0ES19; D0ES20; D0ES16; R4JB44; Q6QGW0; T1LG74; A0A346R8T7; A0A089VKK4; Q2L990; A0A0A0QYP7; B8XU51; V9P6N2; Q38L52	0	949.437	8	H	H	H	NF	H	H	H	1.32	1	949.436	-1.29	9.0241
TRUE	Master Protein	A0A1P8DT27	Alpha-gliadin storage protein (Fragment) OS=Triticum spelta OX=58933 PE=2 SV=1	71.4286	24	899	1	1	287	32.9	8.03	H	H	H	H	H	H	H	854.78	24
	Confidence	Sequence	Modifications	# Protein Groups	# Proteins	# PSMs	Master Protein Accessions	# Missed Cleavages	Theo. MH+ [Da]	Sequence Length	Found in Sample Group: 1_AG38Duetto	Found in Sample Group: 5_AG167PI	Found in Sample Group: S_Semola	Found in Sample Group: 4_AG77Neolatino	Found in Sample Group: 3_AG69Lloyd	Found in Sample Group: SI_SemolaIntegrale	Found in Sample Group: 2_AG33Colosseo	XCorr Sequest HT	Charge Sequest HT	m/z [Da] Sequest HT	DeltaM [ppm] Sequest HT	RT [min] Sequest HT
	H	ALQTLPAMCNVY	1xCarbamidomethyl [C9]	25	250	84	A0A0E3Z552; G9I1R6; G9I1R5; A0A1P8DT82; A0A1P8DTB0; A0A0E3URC4; G9I1S5; A0A1P8DSN6; A8VZI4; H8Y0G8; D2X6C9; M8AS61; A9YRP1; Q0GK30; A0A1P8DSE3; M4WER7; A9YRP3; I0IT53; A0A0E3UQX9; I0IT57; X2KWD8; A0A1P8DT27; I0IT59; A9Z0K0; A0A0E3Z7K2	2	1380.67	12	H	H	H	H	H	H	H	2.23	2	690.836	-0.04	26.2605
	H	CCQHLW	2xCarbamidomethyl [C1; C2]	18	250	86	A0A1P8DSI8; Q2QL61; A0A0E3UQX3; A0A1P8DT82; M4WFC9; M4WEQ6; H9NAK8; A0A1P8DSH1; A0A1P8DT06; A0A0E3Z5X0; D2X6C9; Q0GK30; A0A1P8DSE3; A0A1P8DSE0; A0A0E3UQX9; A0A1P8DSG6; A0A1P8DT27; A0A0E3Z7K2	1	903.36	6	H	H	H	H	H	H	H	2.2	2	452.184	0.17	9.5908
	H	CTIAPF	1xCarbamidomethyl [C1]	18	253	140	A0A1P8DSI8; A0A0E3UQX3; M4WFC9; Q41533; M4WEQ6; A0A1P8DSH1; H8Y0D1; A0A1P8DSY8; H8Y0E6; Q0GK30; A0A1P8DSE0; M4WER7; A0A0E3UQX9; A0A1P8DSG6; A0A1P8DT27; H8Y0E7; G9I1R9; A0A0E3Z7K2	0	708.339	6	H	H	H	H	H	H	H	1.84	1	708.338	-0.2	19.4467
	H	GIFGTN		44	372	134	A0A2R2Y432; A0A1P8DSI8; A0A0E3Z552; G9I1R6; U3PUB1; G9I1R5; I3RXY0; A0A1P8DT82; R9XST5; M4WH49; I3RXV8; A0A1P8DTB0; A0A0E3URC4; G9I1S5; A0A1P8DSN6; I3RXY2; A0A1P8DSH1; A0A0E3Z5J4; A7LHC5; A0A291I1T3; M4WYH4; E0Z2G0; H8Y0D1; A5JSA3; A0A1P8DSY8; F5A7H0; H8Y0E6; D2X6C9; M8AS61; A9YRP1; U3PXH9; Q0GK30; A0A1P8DSE3; M4WER7; R9XUL8; A7LHB8; A0A0E3UQX9; X2L2G3; X2KWD8; I3RXW9; E0Z2G8; A0A1P8DT27; H8Y0E7;…	1	608.304	6	H	H	H	H	H	H	H	1.65	1	608.304	0.47	15.7513
	H	HQQQKQQQQPSSQVSF		15	195	16	A0A1P8DSI8; A0A1P8DT82; Q9M4L8; Q41533; M4WEQ6; H9NAK8; I0CCD0; A0A1P8DT06; A0A023WGB8; A0A0E3Z5X0; Q0GK30; A0A1P8DSE0; R9XU77; A0A1P8DT27; A0A0E3Z5C7	0	1912.93	16	NF	H	H	H	H	H	H	2.1	2	956.964	-2.52	3.4526
	H	IPPYCTIAPF	1xCarbamidomethyl [C5]	18	250	47	A0A1P8DSI8; A0A0E3UQX3; M4WFC9; Q41533; M4WEQ6; A0A1P8DSH1; H8Y0D1; A0A1P8DSY8; H8Y0E6; Q0GK30; M4WER7; A0A0E3UQX9; A0A1P8DSG6; A0A1P8DT27; H8Y0E7; G9I1R9; R9XSU5; A0A0E3Z7K2	1	1178.59	10	H	H	H	H	H	H	H	2.13	1	1178.59	-0.32	30.4528
	H	LQLQPFLQPQLPY	1xDeamidated [Q8]	3	20	44	A0A1P8DT82; A5JSA3; A0A1P8DT27	5	1585.86	13	H	H	H	H	H	H	H	2.28	2	793.44	6.09	33.8382
	H	LQPQLPY		5	26	7	U3PUB1; A0A1P8DT82; A0A0E3URC2; A5JSA3; A0A1P8DT27	2	858.472	7	H	H	NF	H	NF	H	H	1.4	1	858.471	-0.56	19.44
	H	QQYPL		19	265	70	A0A1P8DSI8; A0A0E3UQX3; A0A1P8DT82; Q9M4L8; Q41533; M4WEQ6; H9NAK8; I0CCD0; A0A1P8DT06; H8Y0D1; A0A023WGB8; A0A0E3Z5X0; A0A0N7A547; Q0GK30; A0A1P8DSE0; A0A0E3UR88; A0A0D9XG85; R9XU77; A0A1P8DT27	1	648.335	5	H	H	H	H	H	H	H	1.28	1	648.334	-1.52	11.483
	H	QQYPLGQGSF		17	234	30	A0A1P8DSI8; A0A0E3UQX3; A0A1P8DT82; Q9M4L8; Q41533; M4WEQ6; H9NAK8; I0CCD0; A0A1P8DT06; H8Y0D1; A0A023WGB8; A0A0E3Z5X0; Q0GK30; A0A1P8DSE0; A0A0E3UR88; R9XU77; A0A1P8DT27	2	1124.54	10	H	H	H	H	H	H	H	2.19	1	1124.54	-1.4	20.3788
	H	QTLPAMCNVY	1xCarbamidomethyl [C7]	27	251	5	A0A0E3Z552; G9I1R6; G9I1R5; A0A1P8DT82; A0A1P8DTB0; A0A0E3URC4; G9I1S5; A0A1P8DSN6; A0A1P8DSH1; A8VZI4; A0A1P8DSY8; H8Y0G8; D2X6C9; M8AS61; A9YRP1; Q0GK30; A0A1P8DSE3; M4WER7; A9YRP3; I0IT53; A0A0E3UQX9; I0IT57; X2KWD8; A0A1P8DT27; I0IT59; A9Z0K0; A0A0E3Z7K2	1	1196.54	10	NF	H	H	H	NF	H	NF	1.45	2	598.775	-1	21.3197
	H	RPQQPYPQPQPQY		23	250	136	A0A1P8DSI8; U3PUB1; I3RXY0; A0A1P8DT82; R9XST5; I3RXV8; Q2QL52; A7LHC5; A0A291I1T3; M4WYH4; E0Z2G0; Q2QL42; A5JSA3; D2X6C9; U3PXH9; Q0GK30; A0A1P8DSE3; R9XUL8; A0A0E3UQX9; I3RXX8; I3RXW9; A0A1P8DT27; A0A0E3Z7K2	1	1626.8	13	H	H	H	H	H	H	H	3.18	2	813.904	-1.36	8.8088
	H	RPSQQNPQAQGSVQPQQLPQYEEIRNL		1	8	28	A0A1P8DT27	2	3133.58	27	H	H	H	H	NF	H	H	6.31	3	1045.2	-1.08	19.4316
	H	SQPQPF		16	253	23	A0A1P8DSI8; Q2QL61; A0A1P8DT82; M4WFC9; Q41533; M4WEQ6; H9NAK8; A0A1P8DT06; A0A023WGB8; A0A0E3Z5X0; D2X6C9; Q0GK30; A0A1P8DSE3; A0A0E3UQX9; A0A1P8DT27; A0A0E3Z7K2	0	703.341	6	H	H	H	H	H	H	H	1.67	1	703.341	-0.21	9.3433
	H	VQQQQFPGQQQQFPPQQPYPQPQPFPSQQPY		12	77	38	A0A0E3Z552; A0A0E3URC4; A0A1P8DSH1; A0A0K2QJ82; A0A1K0ISY9; Q9S8X3; Q1WA40; X2L2G3; A5JSB8; A0A1K0ITH3; X2KWE1; A0A1P8DT27	4	3695.77	31	H	H	H	H	H	H	H	3.83	3	1232.59	0.32	29.4656
	H	VRVPVPQPQPQNPSQPQPQGQVPL		3	14	5	A0A023WGF7; F4YT75; A0A1P8DT27	4	2615.41	24	NF	H	NF	NF	NF	NF	NF	1.87	3	872.473	-0.21	18.1832
TRUE	Master Protein	A0A0E3Z7K2	Alpha-gliadin (Fragment) OS=Triticum turgidum subsp. durum OX=4567 PE=4 SV=1	60.4895	33	1084	2	1	286	32.9	7.4	H	H	H	H	H	H	H	853.66	33
	Confidence	Sequence	Modifications	# Protein Groups	# Proteins	# PSMs	Master Protein Accessions	# Missed Cleavages	Theo. MH+ [Da]	Sequence Length	Found in Sample Group: 1_AG38Duetto	Found in Sample Group: 5_AG167PI	Found in Sample Group: S_Semola	Found in Sample Group: 4_AG77Neolatino	Found in Sample Group: 3_AG69Lloyd	Found in Sample Group: SI_SemolaIntegrale	Found in Sample Group: 2_AG33Colosseo	XCorr Sequest HT	Charge Sequest HT	m/z [Da] Sequest HT	DeltaM [ppm] Sequest HT	RT [min] Sequest HT
	H	ALQTLPAMCNVY	1xCarbamidomethyl [C9]	25	250	84	A0A0E3Z552; G9I1R6; G9I1R5; A0A1P8DT82; A0A1P8DTB0; A0A0E3URC4; G9I1S5; A0A1P8DSN6; A8VZI4; H8Y0G8; D2X6C9; M8AS61; A9YRP1; Q0GK30; A0A1P8DSE3; M4WER7; A9YRP3; I0IT53; A0A0E3UQX9; I0IT57; X2KWD8; A0A1P8DT27; I0IT59; A9Z0K0; A0A0E3Z7K2	2	1380.67	12	H	H	H	H	H	H	H	2.23	2	690.836	-0.04	26.2605
	H	CCQHLW	2xCarbamidomethyl [C1; C2]	18	250	86	A0A1P8DSI8; Q2QL61; A0A0E3UQX3; A0A1P8DT82; M4WFC9; M4WEQ6; H9NAK8; A0A1P8DSH1; A0A1P8DT06; A0A0E3Z5X0; D2X6C9; Q0GK30; A0A1P8DSE3; A0A1P8DSE0; A0A0E3UQX9; A0A1P8DSG6; A0A1P8DT27; A0A0E3Z7K2	1	903.36	6	H	H	H	H	H	H	H	2.2	2	452.184	0.17	9.5908
	H	CTIAPF	1xCarbamidomethyl [C1]	18	253	140	A0A1P8DSI8; A0A0E3UQX3; M4WFC9; Q41533; M4WEQ6; A0A1P8DSH1; H8Y0D1; A0A1P8DSY8; H8Y0E6; Q0GK30; A0A1P8DSE0; M4WER7; A0A0E3UQX9; A0A1P8DSG6; A0A1P8DT27; H8Y0E7; G9I1R9; A0A0E3Z7K2	0	708.339	6	H	H	H	H	H	H	H	1.84	1	708.338	-0.2	19.4467
	H	FGTN		24	250	9	A0A2R2Y432; A0A0E3Z552; U3PUB1; I3RXY0; R9XST5; I3RXV8; G9I1S5; I3RXY2; A0A0E3Z5J4; A7LHC5; A0A2R2Y404; A0A291I1T3; M4WYH4; E0Z2G0; H8Y0D1; A5JSA3; D2X6C9; M8AS61; U3PXH9; Q0GK30; R9XUL8; I3RXW9; E0Z2G8; A0A0E3Z7K2	1	438.198	4	H	H	H	H	H	H	H	1.04	1	438.198	0.3	30.7198
	H	GIFGTN		44	372	134	A0A2R2Y432; A0A1P8DSI8; A0A0E3Z552; G9I1R6; U3PUB1; G9I1R5; I3RXY0; A0A1P8DT82; R9XST5; M4WH49; I3RXV8; A0A1P8DTB0; A0A0E3URC4; G9I1S5; A0A1P8DSN6; I3RXY2; A0A1P8DSH1; A0A0E3Z5J4; A7LHC5; A0A291I1T3; M4WYH4; E0Z2G0; H8Y0D1; A5JSA3; A0A1P8DSY8; F5A7H0; H8Y0E6; D2X6C9; M8AS61; A9YRP1; U3PXH9; Q0GK30; A0A1P8DSE3; M4WER7; R9XUL8; A7LHB8; A0A0E3UQX9; X2L2G3; X2KWD8; I3RXW9; E0Z2G8; A0A1P8DT27; H8Y0E7;…	1	608.304	6	H	H	H	H	H	H	H	1.65	1	608.304	0.47	15.7513
	H	IHNVVHA		25	251	6	A0A2R2Y432; A0A0E3Z552; U3PUB1; I3RXY0; R9XST5; I3RXV8; I3RXY2; Q2QL52; A0A0E3Z5J4; A7LHC5; A0A2R2Y404; A0A291I1T3; M4WYH4; E0Z2G0; Q2QL42; A5JSA3; D2X6C9; M8AS61; U3PXH9; Q0GK30; R9XUL8; I3RXW9; E0Z2G8; M8ANS4; A0A0E3Z7K2	3	789.437	7	NF	H	NF	NF	NF	NF	NF	1.35	1	789.435	-1.41	2.9342
	H	IPPYCTIAPF	1xCarbamidomethyl [C5]	18	250	47	A0A1P8DSI8; A0A0E3UQX3; M4WFC9; Q41533; M4WEQ6; A0A1P8DSH1; H8Y0D1; A0A1P8DSY8; H8Y0E6; Q0GK30; M4WER7; A0A0E3UQX9; A0A1P8DSG6; A0A1P8DT27; H8Y0E7; G9I1R9; R9XSU5; A0A0E3Z7K2	1	1178.59	10	H	H	H	H	H	H	H	2.13	1	1178.59	-0.32	30.4528
	H	LGQQQPFPPQQPY		14	259	9	A0A1P8DSI8; A0A1P8DT82; M4WFC9; I3RXV8; Q41533; M4WEQ6; H9NAK8; A0A1P8DT06; A0A023WGB8; D2X6C9; Q0GK30; A0A1P8DSE3; A0A1P8DSG6; A0A0E3Z7K2	2	1527.76	13	NF	NF	H	NF	H	NF	NF	1.04	2	764.38	-3.74	17.7657
	H	LQIQPF		23	255	99	A0A0E3Z552; I3RXY0; A0A1P8DT82; R9XST5; I3RXV8; A0A0E3URC4; G9I1S5; I3RXY2; Q2QL52; A0A1P8DSH1; A7LHC5; A0A291I1T3; M4WYH4; E0Z2G0; Q2QL42; A5JSA3; D2X6C9; U3PXH9; Q0GK30; A0A1P8DSE3; R9XUL8; E0Z2G8; A0A0E3Z7K2	1	745.424	6	H	H	H	H	NF	H	H	1.47	1	745.424	-0.8	24.676
	H	LQLQPFPQPQLPY		20	250	73	A0A1P8DSI8; I3RXY0; R9XST5; I3RXV8; G9I1S5; I3RXY2; Q2QL52; A0A291I1T3; M4WYH4; E0Z2G0; Q2QL42; D2X6C9; U3PXH9; Q0GK30; A0A1P8DSE3; R9XUL8; A0A1P8DT67; A0A0E3UQX9; E0Z2G8; A0A0E3Z7K2	4	1568.85	13	H	H	H	H	H	H	H	3.49	2	784.927	-0.42	33.5583
	H	QQPQQQYPL		18	185	71	Q2QL61; A0A142L072; M4WFC9; H8Y0F3; A0A0N7A5G3; I6U6J1; A0A0E3URA8; E5FF30; A0A1P8DSE3; M4WER7; A0A0E3Z5V1; E5FF35; A0A0N7A522; A0A0E3UQX9; A0A142L083; E5FF31; A0A1P8DSG6; A0A0E3Z7K2	1	1129.56	9	H	H	H	H	H	H	H	2.49	2	565.285	-0.87	13.0335
	H	QQPQQQYPLGQGSF		15	138	17	Q2QL61; A0A142L072; M4WFC9; H8Y0F3; I6U6J1; A0A0E3URA8; E5FF30; A0A1P8DSE3; M4WER7; A0A0E3Z5V1; A0A0E3UQX9; A0A142L083; E5FF31; A0A1P8DSG6; A0A0E3Z7K2	2	1605.77	14	H	H	H	H	H	H	H	3.21	2	803.385	-2.08	20.6857
	H	QTLPAMCNVY	1xCarbamidomethyl [C7]	27	251	5	A0A0E3Z552; G9I1R6; G9I1R5; A0A1P8DT82; A0A1P8DTB0; A0A0E3URC4; G9I1S5; A0A1P8DSN6; A0A1P8DSH1; A8VZI4; A0A1P8DSY8; H8Y0G8; D2X6C9; M8AS61; A9YRP1; Q0GK30; A0A1P8DSE3; M4WER7; A9YRP3; I0IT53; A0A0E3UQX9; I0IT57; X2KWD8; A0A1P8DT27; I0IT59; A9Z0K0; A0A0E3Z7K2	1	1196.54	10	NF	H	H	H	NF	H	NF	1.45	2	598.775	-1	21.3197
	H	RPQQPYPQPQPQY		23	250	136	A0A1P8DSI8; U3PUB1; I3RXY0; A0A1P8DT82; R9XST5; I3RXV8; Q2QL52; A7LHC5; A0A291I1T3; M4WYH4; E0Z2G0; Q2QL42; A5JSA3; D2X6C9; U3PXH9; Q0GK30; A0A1P8DSE3; R9XUL8; A0A0E3UQX9; I3RXX8; I3RXW9; A0A1P8DT27; A0A0E3Z7K2	1	1626.8	13	H	H	H	H	H	H	H	3.18	2	813.904	-1.36	8.8088
	H	SQPQPF		16	253	23	A0A1P8DSI8; Q2QL61; A0A1P8DT82; M4WFC9; Q41533; M4WEQ6; H9NAK8; A0A1P8DT06; A0A023WGB8; A0A0E3Z5X0; D2X6C9; Q0GK30; A0A1P8DSE3; A0A0E3UQX9; A0A1P8DT27; A0A0E3Z7K2	0	703.341	6	H	H	H	H	H	H	H	1.67	1	703.341	-0.21	9.3433
	H	TQPQPFPSQQPY		2	10	4	A0A0E3Z5C7; A0A0E3Z7K2	1	1417.67	12	NF	NF	H	NF	H	NF	NF	1.12	2	709.34	-0.72	16.9052
	H	VRVPVPQLQPQNPSQQQPQEQVPL		27	253	373	A0A2R2Y432; G9I1R6; I3RXY0; A0A1P8DT82; R9XST5; I3RXV8; A0A1P8DTB0; A0A0E3URC4; A0A0E3URC2; Q41533; Q2QL52; A0A1P8DSH1; A0A0E3Z5J4; A0A291I1T3; M4WYH4; E0Z2G0; Q2QL42; A5JSA3; U3PXH9; Q0GK30; I0IT53; I0IT57; I3RXW9; H8Y0E7; I0IT59; G9I1R9; A0A0E3Z7K2	1	2734.46	24	H	H	H	H	H	H	H	5.68	2	1367.74	-0.2	23.137
	H	XPPY		48	754	523	A0A2R2Y432; A0A1D6PVA1; U3PUB1; I3RXY0; R9XST5; I3RXV8; N1QY29; A0A1D6PVM1; B6SIP3; Q2QW32; A0A1D6KZ84; G9I1S5; A0A1D6HD02; C5YAM7; A0A0Q3EYP3; I3RXY2; Q8H344; A0A0E3Z5J4; A7LHC5; A0A2R2Y404; A0A291I1T3; A0A2K2CRT5; Q0IS09; M4WYH4; E0Z2G0; H8Y0D1; A5JSA3; M8D541; K7VGB7; K7VQS8; M8AS61; A0A194YQ58; U3PXH9; Q0GK30; A0A1D6GM06; R9XUL8; I0IT53; A0A1D6PVH3; I1J1J8; I0IT57; I3RXW9; B6SII5; E0Z2G8; I0I…	0	489.271	4	H	H	H	H	H	H	H	1.33	1	489.271	-0.08	9.3314
TRUE	Master Protein	A0A346R8U2	Low molecular weight glutenin subunit M3 OS=Aegilops comosa OX=4485 GN=LMW-M3 PE=4 SV=1	65.0641	31	995	1	1	312	35.4	8.13	H	H	H	H	H	H	H	850.02	31
	Confidence	Sequence	Modifications	# Protein Groups	# Proteins	# PSMs	Master Protein Accessions	# Missed Cleavages	Theo. MH+ [Da]	Sequence Length	Found in Sample Group: 1_AG38Duetto	Found in Sample Group: 5_AG167PI	Found in Sample Group: S_Semola	Found in Sample Group: 4_AG77Neolatino	Found in Sample Group: 3_AG69Lloyd	Found in Sample Group: SI_SemolaIntegrale	Found in Sample Group: 2_AG33Colosseo	XCorr Sequest HT	Charge Sequest HT	m/z [Da] Sequest HT	DeltaM [ppm] Sequest HT	RT [min] Sequest HT
	H	ARSQML		49	270	7	D0F0C5; J9QEK9; D0ES12; B2LWZ2; G0YLZ2; G9AYK6; A0A2P1BXV0; B5A810; C8CCM7; Q6J6V0; R4JFH5; A0A346R8U1; R4JAP5; A9YWM3; D3U329; P93794; J9QFV1; C6K8R8; A0A287EIZ3; F5A7G7; B5A816; Q84NE4; A0A2R4Q9T1; A0A346R8U2; F6KHQ0; R4JB62; D0ES19; B5A813; F1C940; A0A0U3AIG6; Q5XXZ9; D5FPE9; Q9XGF0; A8CA05; Q3YB17; B2LWZ6; A0A346R8T9; Q84U16; T1LG74; A0A346R8T7; A0A2R4Q9V4; A0A346R8T6; A0A089VKK4; Q2L990; A0A…	0	705.371	6	H	NF	H	H	H	H	H	1.23	1	705.37	-1.74	3.2777
	H	GQCVSQPQQQL	1xCarbamidomethyl [C3]	25	134	7	Q38L53; G9AYK6; X2J8E3; F1C945; R9XV91; Q5MFH0; Q38L54; R9XUD0; P93794; A0A1U9XLA9; Q84NE4; F1C943; A0A1G4P206; Q2PQJ6; A0A346R8U2; X2JAE7; D0ES19; D0ES20; R4JB44; Q6QGW0; A2IBV2; Q2L990; K7R468; B2LX00; Q38L52	0	1272.6	11	H	NF	NF	NF	NF	H	H	1.96	2	636.803	-0.45	7.4146
	H	GQCVSQPQQQLQQQL	1xCarbamidomethyl [C3]	24	131	3	Q38L53; G9AYK6; X2J8E3; F1C945; R9XV91; Q5MFH0; Q38L54; R9XUD0; P93794; A0A1U9XLA9; Q84NE4; A0A1G4P206; Q2PQJ6; A0A346R8U2; X2JAE7; D0ES19; D0ES20; R4JB44; Q6QGW0; A2IBV2; Q2L990; K7R468; B2LX00; Q38L52	1	1769.86	15	H	NF	NF	NF	NF	NF	NF	1.69	2	885.433	-0.34	15.8372
	H	GQQPQQQQL		29	250	39	D0F0C5; K7WV80; A0A3G3C4J5; A0A165R8I1; D0ES12; R9XVA5; A0A0A0R2J7; G9AYK6; X2J8E3; R4JFH5; P93794; Q84NE4; R4JDM1; Q5MFK8; Q2PQJ6; A0A346R8U2; D0ES19; F1C940; Q9XGF0; Q3YB17; Q5MFH4; T1LG74; A0A346R8T7; A0A2R4Q9V4; A0A089VKK4; Q2L990; A0A0A0QYP7; B8XU51; B2LX00	0	1054.53	9	H	H	H	H	H	H	H	2.05	1	1054.53	-0.47	3.9132
	H	GVGTGVGA		51	250	18	Q5PU42; D0F0C5; K7WV80; A0A3G3C4J5; Q1ZZT4; A0A165R8I1; B8XU59; P93792; D0PX24; C6K8R4; D0ES12; B2LWZ2; G9AYK6; H6VLQ1; I3QPG3; Q8W3V8; B5A810; F4YT76; R4JFH5; A0A346R8U1; D2DII6; Q0PW08; F5A7G7; B5A816; I3QPG6; A0A346R8U2; Q41547; H9XH00; Q84U17; A0A0U3AGE0; B5A813; F1C940; Q5XXZ9; K7XED4; D7RFI1; F8SGM2; R4JD66; I3QPG4; Q9XGF0; Q8H0J4; Q3YB17; B2LWZ6; A0A346R8T9; K7XED9; Q6B780; T1LG74; A0A346R…	0	617.325	8	H	H	H	H	H	H	H	2.13	1	617.325	-0.69	3.6119
	H	GVGTGVGAY		51	250	8	Q5PU42; D0F0C5; K7WV80; A0A3G3C4J5; Q1ZZT4; A0A165R8I1; B8XU59; P93792; D0PX24; C6K8R4; D0ES12; B2LWZ2; G9AYK6; H6VLQ1; I3QPG3; Q8W3V8; B5A810; F4YT76; R4JFH5; A0A346R8U1; D2DII6; Q0PW08; F5A7G7; B5A816; I3QPG6; A0A346R8U2; Q41547; H9XH00; Q84U17; A0A0U3AGE0; B5A813; F1C940; Q5XXZ9; K7XED4; D7RFI1; F8SGM2; R4JD66; I3QPG4; Q9XGF0; Q8H0J4; Q3YB17; B2LWZ6; A0A346R8T9; K7XED9; Q6B780; T1LG74; A0A346R…	0	780.389	9	H	NF	H	H	H	NF	NF	1.63	1	780.388	-0.51	10.1166
	H	LQPHQLAQL		53	256	324	D0F0C5; K7WV80; A9YRN9; C6K8R4; A0A287EFH8; D0ES12; B2LWZ2; G0YLZ2; G9AYK6; A0A2P1BXV0; Q670S2; B5A810; C8CCM7; Q6J6V0; R4JAP5; A9YWM3; D3U329; P93794; J9QFV1; C6K8R8; A0A287EIZ3; F5A7G7; B5A816; Q84NE4; A0A2R4Q9T1; A0A346R8U2; F6KHQ0; Q40026; R4JB62; Q84U17; B5A813; F1C940; A0A0U3AIG6; Q5XXZ9; C8CCM8; D5FPE9; Q9XGF0; A0A287EFG2; A8CA05; Q3YB17; B2LWZ6; A0A346R8T9; Q84U16; A0A346R8T7; A0A2R4Q9V4;…	2	1047.59	9	H	H	H	H	H	H	H	2.76	2	524.301	1.03	10.8766
	H	QPHQLAQL		53	256	14	D0F0C5; K7WV80; A9YRN9; C6K8R4; A0A287EFH8; D0ES12; B2LWZ2; G0YLZ2; G9AYK6; A0A2P1BXV0; Q670S2; B5A810; C8CCM7; Q6J6V0; R4JAP5; A9YWM3; D3U329; P93794; J9QFV1; C6K8R8; A0A287EIZ3; F5A7G7; B5A816; Q84NE4; A0A2R4Q9T1; A0A346R8U2; F6KHQ0; Q40026; R4JB62; Q84U17; B5A813; F1C940; A0A0U3AIG6; Q5XXZ9; C8CCM8; D5FPE9; Q9XGF0; A0A287EFG2; A8CA05; Q3YB17; B2LWZ6; A0A346R8T9; Q84U16; A0A346R8T7; A0A2R4Q9V4;…	1	934.51	8	H	NF	H	H	H	H	H	1.53	2	467.759	0.32	5.8896
	H	QQLNPCKVF	1xCarbamidomethyl [C6]	46	251	287	D0F0C5; K7WV80; N1R0S5; K7WV72; G0YLZ2; G9AYK6; A0A2P1BXV0; I3QPG3; A0A346R8U0; Q6J6V0; R4JFH5; A0A346R8U1; R4JAP5; Q6J6U9; A0A2R4Q9T7; D3U329; R4JFK3; P93794; C6K8R8; A0A287EIZ3; B5A816; Q84NE4; I3QPH1; A0A2R4Q9T1; A0A346R8U2; Q40026; R4JB62; A0A0U3AIG6; D7RFI1; R4JD66; A0A2R4Q9U1; A0A2R4Q9S8; Q9XGF0; A8CA05; Q3YB17; B2LWZ6; A0A346R8T7; A0A2R4Q9V4; A0A346R8T6; A0A089VKK4; A8IEC6; A0A2R4Q9S5; B2L…	1	1133.58	9	H	H	H	H	H	H	H	2.56	2	567.292	0.33	14.0594
	H	QQLNPCKVF	1xGln->pyro-Glu [N-Term]; 1xCarbamidomethyl [C6]	46	250	108	D0F0C5; K7WV80; N1R0S5; K7WV72; G0YLZ2; G9AYK6; A0A2P1BXV0; I3QPG3; A0A346R8U0; Q6J6V0; R4JFH5; A0A346R8U1; R4JAP5; Q6J6U9; A0A2R4Q9T7; D3U329; R4JFK3; P93794; C6K8R8; A0A287EIZ3; B5A816; Q84NE4; I3QPH1; A0A2R4Q9T1; A0A346R8U2; Q40026; R4JB62; A0A0U3AIG6; D7RFI1; R4JD66; A0A2R4Q9U1; A0A2R4Q9S8; Q9XGF0; A8CA05; Q3YB17; B2LWZ6; A0A346R8T7; A0A2R4Q9V4; A0A346R8T6; A0A089VKK4; A8IEC6; A0A2R4Q9S5; B2L…	1	1116.55	9	H	H	H	H	H	H	H	1.47	1	1116.55	0.02	23.8566
	H	QQQLGQQPQQQQL	1xGln->pyro-Glu [N-Term]	26	166	3	Q38L53; A0A0A0R2J7; G9AYK6; X2J8E3; F1C945; R9XV91; Q5MFH0; R9XUD0; P93794; A0A1U9XLA9; Q84NE4; A0A1G4P206; Q2PQJ6; A0A346R8U2; X2JAE7; D0ES19; D0ES20; D0ES16; R4JB44; Q6QGW0; A2IBV2; A0A089VKK4; Q2L990; A0A0A0QYP7; B2LX00; Q38L52	1	1534.76	13	H	NF	NF	NF	NF	NF	H	1.21	2	767.885	0.84	18.0764
	H	QQQLGQQPQQQQL		26	166	23	Q38L53; A0A0A0R2J7; G9AYK6; X2J8E3; F1C945; R9XV91; Q5MFH0; R9XUD0; P93794; A0A1U9XLA9; Q84NE4; A0A1G4P206; Q2PQJ6; A0A346R8U2; X2JAE7; D0ES19; D0ES20; D0ES16; R4JB44; Q6QGW0; A2IBV2; A0A089VKK4; Q2L990; A0A0A0QYP7; B2LX00; Q38L52	1	1551.79	13	H	H	H	H	H	H	H	2.97	2	776.396	-1.49	9.8089
	H	QQQPLPPQQTFPQQPLFSQQQQQPFPQQPSF	1xGln->pyro-Glu [N-Term]; 1xDeamidated [Q23]	1	3	15	A0A346R8U2	5	3661.77	31	NF	NF	NF	H	NF	NF	NF	2.83	3	1221.27	3.09	30.3845
	H	QQQPPFSQQQPILPQQPPF	2xDeamidated [Q15; Q]	12	146	5	H6VLQ1; Q0PW08; Q7X9J9; Q5MFL6; A0A346R8U2; Q5MFN6; H6VLQ3; A2IBV2; Q3YB18; A0A2R4Q9V4; Q5PU41; B2LX00	2	2235.11	19	NF	NF	NF	NF	H	NF	H	1.54	2	1118.06	2.9	20.8784
	H	SQQQPPF		36	253	26	K7WV80; A0A3G3C4J5; K7WV72; B8XU59; P93792; Q8W3X5; A0A2P1BXV0; Q8W3V8; C8CCM7; Q6J6V0; R4JAP5; A9YWM3; D2DII6; D3U329; R4JFK3; R4JDM1; Q5MFK8; I3QPH1; A0A2R4Q9T1; A0A346R8U2; R4JB62; F1C940; A0A0U3AIG6; Q41552; K7XED4; D7RFI1; C8CCM8; F8SGM2; R4JD66; D5FPE9; A8CA05; A0A346R8T9; Q6B780; A0A2R4Q9V4; B2LX00; C6KI73	0	831.4	7	H	H	H	H	H	H	H	1.48	1	831.399	-1.26	10.1053
TRUE	Master Protein	B2LX00	Low molecular weight glutenin subunit M1 OS=Aegilops comosa OX=4485 GN=LMW-M2 PE=4 SV=1	62.5407	30	966	2	1	307	34.9	8.32	H	H	H	H	H	H	H	845.11	30
	Confidence	Sequence	Modifications	# Protein Groups	# Proteins	# PSMs	Master Protein Accessions	# Missed Cleavages	Theo. MH+ [Da]	Sequence Length	Found in Sample Group: 1_AG38Duetto	Found in Sample Group: 5_AG167PI	Found in Sample Group: S_Semola	Found in Sample Group: 4_AG77Neolatino	Found in Sample Group: 3_AG69Lloyd	Found in Sample Group: SI_SemolaIntegrale	Found in Sample Group: 2_AG33Colosseo	XCorr Sequest HT	Charge Sequest HT	m/z [Da] Sequest HT	DeltaM [ppm] Sequest HT	RT [min] Sequest HT
	H	ARSQML		49	270	7	D0F0C5; J9QEK9; D0ES12; B2LWZ2; G0YLZ2; G9AYK6; A0A2P1BXV0; B5A810; C8CCM7; Q6J6V0; R4JFH5; A0A346R8U1; R4JAP5; A9YWM3; D3U329; P93794; J9QFV1; C6K8R8; A0A287EIZ3; F5A7G7; B5A816; Q84NE4; A0A2R4Q9T1; A0A346R8U2; F6KHQ0; R4JB62; D0ES19; B5A813; F1C940; A0A0U3AIG6; Q5XXZ9; D5FPE9; Q9XGF0; A8CA05; Q3YB17; B2LWZ6; A0A346R8T9; Q84U16; T1LG74; A0A346R8T7; A0A2R4Q9V4; A0A346R8T6; A0A089VKK4; Q2L990; A0A…	0	705.371	6	H	NF	H	H	H	H	H	1.23	1	705.37	-1.74	3.2777
	H	GQCVSQPQQQL	1xCarbamidomethyl [C3]	25	134	7	Q38L53; G9AYK6; X2J8E3; F1C945; R9XV91; Q5MFH0; Q38L54; R9XUD0; P93794; A0A1U9XLA9; Q84NE4; F1C943; A0A1G4P206; Q2PQJ6; A0A346R8U2; X2JAE7; D0ES19; D0ES20; R4JB44; Q6QGW0; A2IBV2; Q2L990; K7R468; B2LX00; Q38L52	0	1272.6	11	H	NF	NF	NF	NF	H	H	1.96	2	636.803	-0.45	7.4146
	H	GQCVSQPQQQLQQQL	1xCarbamidomethyl [C3]	24	131	3	Q38L53; G9AYK6; X2J8E3; F1C945; R9XV91; Q5MFH0; Q38L54; R9XUD0; P93794; A0A1U9XLA9; Q84NE4; A0A1G4P206; Q2PQJ6; A0A346R8U2; X2JAE7; D0ES19; D0ES20; R4JB44; Q6QGW0; A2IBV2; Q2L990; K7R468; B2LX00; Q38L52	1	1769.86	15	H	NF	NF	NF	NF	NF	NF	1.69	2	885.433	-0.34	15.8372
	H	GQQPQQQQL		29	250	39	D0F0C5; K7WV80; A0A3G3C4J5; A0A165R8I1; D0ES12; R9XVA5; A0A0A0R2J7; G9AYK6; X2J8E3; R4JFH5; P93794; Q84NE4; R4JDM1; Q5MFK8; Q2PQJ6; A0A346R8U2; D0ES19; F1C940; Q9XGF0; Q3YB17; Q5MFH4; T1LG74; A0A346R8T7; A0A2R4Q9V4; A0A089VKK4; Q2L990; A0A0A0QYP7; B8XU51; B2LX00	0	1054.53	9	H	H	H	H	H	H	H	2.05	1	1054.53	-0.47	3.9132
	H	GVGTGVGA		51	250	18	Q5PU42; D0F0C5; K7WV80; A0A3G3C4J5; Q1ZZT4; A0A165R8I1; B8XU59; P93792; D0PX24; C6K8R4; D0ES12; B2LWZ2; G9AYK6; H6VLQ1; I3QPG3; Q8W3V8; B5A810; F4YT76; R4JFH5; A0A346R8U1; D2DII6; Q0PW08; F5A7G7; B5A816; I3QPG6; A0A346R8U2; Q41547; H9XH00; Q84U17; A0A0U3AGE0; B5A813; F1C940; Q5XXZ9; K7XED4; D7RFI1; F8SGM2; R4JD66; I3QPG4; Q9XGF0; Q8H0J4; Q3YB17; B2LWZ6; A0A346R8T9; K7XED9; Q6B780; T1LG74; A0A346R…	0	617.325	8	H	H	H	H	H	H	H	2.13	1	617.325	-0.69	3.6119
	H	GVGTGVGAY		51	250	8	Q5PU42; D0F0C5; K7WV80; A0A3G3C4J5; Q1ZZT4; A0A165R8I1; B8XU59; P93792; D0PX24; C6K8R4; D0ES12; B2LWZ2; G9AYK6; H6VLQ1; I3QPG3; Q8W3V8; B5A810; F4YT76; R4JFH5; A0A346R8U1; D2DII6; Q0PW08; F5A7G7; B5A816; I3QPG6; A0A346R8U2; Q41547; H9XH00; Q84U17; A0A0U3AGE0; B5A813; F1C940; Q5XXZ9; K7XED4; D7RFI1; F8SGM2; R4JD66; I3QPG4; Q9XGF0; Q8H0J4; Q3YB17; B2LWZ6; A0A346R8T9; K7XED9; Q6B780; T1LG74; A0A346R…	0	780.389	9	H	NF	H	H	H	NF	NF	1.63	1	780.388	-0.51	10.1166
	H	LQPHQLAQL		53	256	324	D0F0C5; K7WV80; A9YRN9; C6K8R4; A0A287EFH8; D0ES12; B2LWZ2; G0YLZ2; G9AYK6; A0A2P1BXV0; Q670S2; B5A810; C8CCM7; Q6J6V0; R4JAP5; A9YWM3; D3U329; P93794; J9QFV1; C6K8R8; A0A287EIZ3; F5A7G7; B5A816; Q84NE4; A0A2R4Q9T1; A0A346R8U2; F6KHQ0; Q40026; R4JB62; Q84U17; B5A813; F1C940; A0A0U3AIG6; Q5XXZ9; C8CCM8; D5FPE9; Q9XGF0; A0A287EFG2; A8CA05; Q3YB17; B2LWZ6; A0A346R8T9; Q84U16; A0A346R8T7; A0A2R4Q9V4;…	2	1047.59	9	H	H	H	H	H	H	H	2.76	2	524.301	1.03	10.8766
	H	QPHQLAQL		53	256	14	D0F0C5; K7WV80; A9YRN9; C6K8R4; A0A287EFH8; D0ES12; B2LWZ2; G0YLZ2; G9AYK6; A0A2P1BXV0; Q670S2; B5A810; C8CCM7; Q6J6V0; R4JAP5; A9YWM3; D3U329; P93794; J9QFV1; C6K8R8; A0A287EIZ3; F5A7G7; B5A816; Q84NE4; A0A2R4Q9T1; A0A346R8U2; F6KHQ0; Q40026; R4JB62; Q84U17; B5A813; F1C940; A0A0U3AIG6; Q5XXZ9; C8CCM8; D5FPE9; Q9XGF0; A0A287EFG2; A8CA05; Q3YB17; B2LWZ6; A0A346R8T9; Q84U16; A0A346R8T7; A0A2R4Q9V4;…	1	934.51	8	H	NF	H	H	H	H	H	1.53	2	467.759	0.32	5.8896
	H	QQLNPCKVF	1xCarbamidomethyl [C6]	46	251	287	D0F0C5; K7WV80; N1R0S5; K7WV72; G0YLZ2; G9AYK6; A0A2P1BXV0; I3QPG3; A0A346R8U0; Q6J6V0; R4JFH5; A0A346R8U1; R4JAP5; Q6J6U9; A0A2R4Q9T7; D3U329; R4JFK3; P93794; C6K8R8; A0A287EIZ3; B5A816; Q84NE4; I3QPH1; A0A2R4Q9T1; A0A346R8U2; Q40026; R4JB62; A0A0U3AIG6; D7RFI1; R4JD66; A0A2R4Q9U1; A0A2R4Q9S8; Q9XGF0; A8CA05; Q3YB17; B2LWZ6; A0A346R8T7; A0A2R4Q9V4; A0A346R8T6; A0A089VKK4; A8IEC6; A0A2R4Q9S5; B2L…	1	1133.58	9	H	H	H	H	H	H	H	2.56	2	567.292	0.33	14.0594
	H	QQLNPCKVF	1xGln->pyro-Glu [N-Term]; 1xCarbamidomethyl [C6]	46	250	108	D0F0C5; K7WV80; N1R0S5; K7WV72; G0YLZ2; G9AYK6; A0A2P1BXV0; I3QPG3; A0A346R8U0; Q6J6V0; R4JFH5; A0A346R8U1; R4JAP5; Q6J6U9; A0A2R4Q9T7; D3U329; R4JFK3; P93794; C6K8R8; A0A287EIZ3; B5A816; Q84NE4; I3QPH1; A0A2R4Q9T1; A0A346R8U2; Q40026; R4JB62; A0A0U3AIG6; D7RFI1; R4JD66; A0A2R4Q9U1; A0A2R4Q9S8; Q9XGF0; A8CA05; Q3YB17; B2LWZ6; A0A346R8T7; A0A2R4Q9V4; A0A346R8T6; A0A089VKK4; A8IEC6; A0A2R4Q9S5; B2L…	1	1116.55	9	H	H	H	H	H	H	H	1.47	1	1116.55	0.02	23.8566
	H	QQQLGQQPQQQQL	1xGln->pyro-Glu [N-Term]	26	166	3	Q38L53; A0A0A0R2J7; G9AYK6; X2J8E3; F1C945; R9XV91; Q5MFH0; R9XUD0; P93794; A0A1U9XLA9; Q84NE4; A0A1G4P206; Q2PQJ6; A0A346R8U2; X2JAE7; D0ES19; D0ES20; D0ES16; R4JB44; Q6QGW0; A2IBV2; A0A089VKK4; Q2L990; A0A0A0QYP7; B2LX00; Q38L52	1	1534.76	13	H	NF	NF	NF	NF	NF	H	1.21	2	767.885	0.84	18.0764
	H	QQQLGQQPQQQQL		26	166	23	Q38L53; A0A0A0R2J7; G9AYK6; X2J8E3; F1C945; R9XV91; Q5MFH0; R9XUD0; P93794; A0A1U9XLA9; Q84NE4; A0A1G4P206; Q2PQJ6; A0A346R8U2; X2JAE7; D0ES19; D0ES20; D0ES16; R4JB44; Q6QGW0; A2IBV2; A0A089VKK4; Q2L990; A0A0A0QYP7; B2LX00; Q38L52	1	1551.79	13	H	H	H	H	H	H	H	2.97	2	776.396	-1.49	9.8089
	H	QQQPPFSQQQPILPQQPPF	2xDeamidated [Q15; Q]	12	146	5	H6VLQ1; Q0PW08; Q7X9J9; Q5MFL6; A0A346R8U2; Q5MFN6; H6VLQ3; A2IBV2; Q3YB18; A0A2R4Q9V4; Q5PU41; B2LX00	2	2235.11	19	NF	NF	NF	NF	H	NF	H	1.54	2	1118.06	2.9	20.8784
	H	SQQQPPF		36	253	26	K7WV80; A0A3G3C4J5; K7WV72; B8XU59; P93792; Q8W3X5; A0A2P1BXV0; Q8W3V8; C8CCM7; Q6J6V0; R4JAP5; A9YWM3; D2DII6; D3U329; R4JFK3; R4JDM1; Q5MFK8; I3QPH1; A0A2R4Q9T1; A0A346R8U2; R4JB62; F1C940; A0A0U3AIG6; Q41552; K7XED4; D7RFI1; C8CCM8; F8SGM2; R4JD66; D5FPE9; A8CA05; A0A346R8T9; Q6B780; A0A2R4Q9V4; B2LX00; C6KI73	0	831.4	7	H	H	H	H	H	H	H	1.48	1	831.399	-1.26	10.1053
TRUE	Master Protein	F8SGM7	Low-molecular-weight glutenin subunit OS=Triticum aestivum OX=4565 PE=2 SV=1	86	39	1086	1	1	350	39.8	8.32	H	H	H	H	H	H	H	842.06	39
	Confidence	Sequence	Modifications	# Protein Groups	# Proteins	# PSMs	Master Protein Accessions	# Missed Cleavages	Theo. MH+ [Da]	Sequence Length	Found in Sample Group: 1_AG38Duetto	Found in Sample Group: 5_AG167PI	Found in Sample Group: S_Semola	Found in Sample Group: 4_AG77Neolatino	Found in Sample Group: 3_AG69Lloyd	Found in Sample Group: SI_SemolaIntegrale	Found in Sample Group: 2_AG33Colosseo	XCorr Sequest HT	Charge Sequest HT	m/z [Da] Sequest HT	DeltaM [ppm] Sequest HT	RT [min] Sequest HT
	H	CSVNVPVY	1xCarbamidomethyl [C1]	22	93	3	A2IBK1; Q8W3X5; A0A2P1BXV0; Q6J6V0; A0A0U3ANN8; A0A346R8U1; R4JAP5; A9YWM3; D3U329; F8SGM9; A0A2R4Q9T1; R4JB62; D5FPF3; A0A0U3AIG6; C8CCM8; A2IBJ9; D5FPE9; A8CA05; F8SGM7; D5FPF4; Q68VI0; F8SGN9	3	937.445	8	NF	NF	H	NF	H	NF	H	1.18	1	937.444	-0.8	16.9848
	H	DAIRAIIY		25	101	217	A2IBK1; Q8W3X5; A0A2P1BXV0; Q6J6V0; A0A0U3ANN8; R4JAP5; A9YWM3; D5FPF1; D3U329; V9P785; F8SGM9; A0A2R4Q9T1; R4JB62; D5FPF3; A0A0U3AIG6; Q41552; C8CCM8; A2IBJ9; D5FPE9; A8CA05; F8SGM7; D5FPF4; Q68VI0; F8SGN9; B8Y0L6	0	934.536	8	H	H	H	H	H	H	H	2.32	2	467.772	0.44	19.2101
	H	GQWPQQQQVPQGTL		22	88	15	A2IBK1; Q8W3X5; A0A2P1BXV0; Q6J6V0; A0A0U3ANN8; R4JAP5; A9YWM3; D3U329; V9P785; F8SGM9; A0A2R4Q9T1; R4JB62; D5FPF3; A0A0U3AIG6; C8CCM8; A2IBJ9; A8CA05; F8SGM7; D5FPF4; Q68VI0; F8SGN9; B8Y0L6	1	1594.8	14	H	H	H	H	H	H	H	2.49	2	797.901	-1.57	19.641
	H	GTTTIVPF		12	67	14	Q8W3X5; A0A2P1BXV0; A0A0U3ANN8; F8SGM9; R4JB62; C8CCM8; A2IBJ9; A8CA05; F8SGM7; D5FPF4; Q68VI0; F8SGN9	0	835.456	8	H	H	H	H	H	H	H	1.56	1	835.456	0.58	24.7638
	H	GVGTRVGAY		18	72	20	A2IBK1; Q8W3X5; A0A2P1BXV0; A0A0U3ANN8; R4JAP5; A9YWM3; D5FPF1; D3U329; F8SGM9; R4JB62; D5FPF3; C8CCM8; A2IBJ9; A8CA05; F8SGM7; D5FPF4; F8SGN9; B8Y0L6	0	879.468	9	H	H	H	H	H	H	H	1.63	2	440.237	-1.23	3.9266
	H	LPQQPPFSQQQPPF		11	66	12	Q8W3X5; A0A2P1BXV0; A0A0U3ANN8; A9YWM3; V9P785; F8SGM9; R4JB62; A0A0U3AIG6; F8SGM7; D5FPF4; B8Y0L6	2	1638.83	14	NF	NF	H	H	H	H	H	2.28	2	819.917	-0.39	25.3965
	H	LQQQCSPVAMPQSL	1xCarbamidomethyl [C5]	33	198	8	R9XVA5; A2IBK1; Q8W3X5; A0A2P1BXV0; D5FPE3; C8CCM7; Q6J6V0; A2IBV5; A9YWM3; D5FPF1; D3U329; V9P785; F8SGM9; Q8W3W8; R4JDM1; A0A2R4Q9T1; K0I5W1; R4JB62; D5FPF3; A0A0U3AGE0; Q41552; Q8W3X4; C8CCM8; A2IBJ9; A8CA05; F8SGM7; D5FPF4; Q68VI0; F8SGN9; Q8W3X0; B2Y2R6; B8Y0L6; A0A0U3ATU4	1	1586.77	14	NF	NF	H	H	H	H	H	1.9	2	793.886	-1	21.583
	H	NQPQQQQPQQSVQGVSQPQQQQKQL		20	82	21	A2IBK1; Q8W3X5; A0A2P1BXV0; Q6J6V0; A0A0U3ANN8; R4JAP5; A9YWM3; D5FPF1; D3U329; V9P785; F8SGM9; A0A2R4Q9T1; R4JB62; Q41552; C8CCM8; A2IBJ9; A8CA05; F8SGM7; F8SGN9; B8Y0L6	0	2887.44	25	H	H	H	H	H	H	H	2.26	3	963.15	-1.6	7.5568
	H	QQPQQQQL		26	108	96	G0YLZ2; A2IBK1; Q8W3X5; A0A2P1BXV0; A0A0U3ANN8; Q5XXZ7; R4JAP5; A9YWM3; D5FPF1; V9P785; F8SGM9; R4JB62; D5FPF3; A0A0U3AGE0; A0A0U3AIG6; C8CCM8; A2IBJ9; D5FPE9; A8CA05; F8SGM7; D4HNA5; D5FPF4; F5A7G6; Q68VI0; F8SGN9; B8Y0L6	0	997.506	8	H	H	H	H	H	H	H	2.65	1	997.505	-0.95	3.8091
	H	QQPQQQQL	1xGln->pyro-Glu [N-Term]	25	103	5	G0YLZ2; A2IBK1; Q8W3X5; A0A2P1BXV0; A0A0U3ANN8; Q5XXZ7; R4JAP5; A9YWM3; D5FPF1; V9P785; F8SGM9; R4JB62; D5FPF3; A0A0U3AIG6; C8CCM8; A2IBJ9; D5FPE9; A8CA05; F8SGM7; D4HNA5; D5FPF4; F5A7G6; Q68VI0; F8SGN9; B8Y0L6	0	980.48	8	NF	NF	NF	NF	H	H	H	1.55	2	490.743	-0.23	11.7416
	H	QQQPIPL		17	76	166	A2IBK1; Q8W3X5; A0A2P1BXV0; A0A0U3ANN8; A9YWM3; V9P785; F8SGM9; R4JB62; C8CCM8; A2IBJ9; A8CA05; F8SGM7; A7X9Y0; D5FPF4; Q68VI0; F8SGN9; B8Y0L6	0	823.467	7	H	H	H	H	H	H	H	1.76	1	823.466	-0.9	16.4551
	H	QQQPLPL	1xGln->pyro-Glu [N-Term]	17	76	42	A2IBK1; Q8W3X5; A0A2P1BXV0; A0A0U3ANN8; A9YWM3; V9P785; F8SGM9; R4JB62; C8CCM8; A2IBJ9; A8CA05; F8SGM7; A7X9Y0; D5FPF4; Q68VI0; F8SGN9; B8Y0L6	1	806.441	7	H	NF	H	H	H	H	H	1.05	1	806.44	-0.23	27.8002
	H	QQQPLPLQQILW		17	74	22	A2IBK1; Q8W3X5; A0A2P1BXV0; A0A0U3ANN8; A9YWM3; V9P785; F8SGM9; R4JB62; C8CCM8; A2IBJ9; A8CA05; F8SGM7; A7X9Y0; D5FPF4; Q68VI0; F8SGN9; B8Y0L6	3	1491.83	12	NF	NF	H	H	H	H	H	2.41	2	746.419	-0.73	38.6784
	H	RTLPTMCSVNVPVY	1xCarbamidomethyl [C7]	16	71	34	A2IBK1; Q8W3X5; A0A2P1BXV0; A0A0U3ANN8; R4JAP5; A9YWM3; F8SGM9; R4JB62; D5FPF3; C8CCM8; A2IBJ9; A8CA05; F8SGM7; D5FPF4; Q68VI0; F8SGN9	1	1636.82	14	H	H	H	H	H	H	H	2.98	2	818.912	-0.76	21.4662
	H	RTLPTMCSVNVPVY	1xOxidation [M6]; 1xCarbamidomethyl [C7]	16	71	9	A2IBK1; Q8W3X5; A0A2P1BXV0; A0A0U3ANN8; R4JAP5; A9YWM3; F8SGM9; R4JB62; D5FPF3; C8CCM8; A2IBJ9; A8CA05; F8SGM7; D5FPF4; Q68VI0; F8SGN9	1	1652.81	14	H	NF	NF	H	H	NF	H	2.36	2	826.909	-1.08	16.5473
	H	RTLPTMCSVNVPVYGTTTIVPF	1xCarbamidomethyl [C7]	12	65	51	Q8W3X5; A0A2P1BXV0; A0A0U3ANN8; F8SGM9; R4JB62; C8CCM8; A2IBJ9; A8CA05; F8SGM7; D5FPF4; Q68VI0; F8SGN9	2	2453.26	22	H	H	H	H	H	H	H	3.94	2	1227.13	-0.53	32.7605
	H	SIVLQEQQHGQGL		13	73	76	A2IBK1; Q8W3X5; A0A2P1BXV0; A0A0U3ANN8; A9YWM3; V9P785; F8SGM9; R4JB62; C8CCM8; A2IBJ9; A8CA05; F8SGM7; D5FPF4	1	1436.75	13	H	H	H	H	H	H	H	3.2	2	718.878	0.24	12.2673
	H	SIVLQEQQHGQGLNQPQQQQPQQSVQGVSQPQQQQKQL	1xDeamidated [Q]	12	60	7	A2IBK1; Q8W3X5; A0A2P1BXV0; A0A0U3ANN8; A9YWM3; V9P785; F8SGM9; R4JB62; C8CCM8; A2IBJ9; A8CA05; F8SGM7	2	4306.16	38	NF	NF	NF	NF	NF	H	NF	1.02	3	1436.06	-0.21	13.363
	H	SQHQQPVLPQQQIPSVQPSIL		12	68	55	A2IBK1; Q8W3X5; A0A2P1BXV0; V9P785; F8SGM9; R4JB62; A2IBJ9; A8CA05; F8SGM7; D5FPF4; F8SGN9; B8Y0L6	1	2352.27	21	H	H	H	H	H	H	H	4.59	2	1176.64	-0.05	23.8399
	H	SQQQQQFPQQQQPL		9	56	3	A2IBK1; A0A2P1BXV0; A0A0U3ANN8; V9P785; F8SGM9; A2IBJ9; A8CA05; F8SGM7; F8SGN9	1	1712.84	14	NF	NF	NF	H	H	NF	NF	1.65	2	856.92	-1.03	13.6968
	H	SQQQQQPLL		12	67	4	D3UAL8; A0A2P1BXV0; R4JAP5; V9P785; F8SGM9; R4JDM1; D5FPF3; A0A0U3AIG6; D5FPE9; F8SGM7; B2LWZ6; B2Y2R6	1	1069.56	9	NF	NF	NF	H	NF	NF	H	1.12	2	535.286	0.68	11.0239
	H	SQQQQQPLLPQQPPF		8	43	16	D3UAL8; A0A2P1BXV0; R4JAP5; F8SGM9; D5FPF3; D5FPE9; F8SGM7; B2Y2R6	2	1763.91	15	H	NF	NF	H	H	NF	H	1.92	2	882.457	-0.55	24.8687
	H	SQQQQQPLLPQQPPFSQHQQPVLPQQQIPSVQPSIL	1xDeamidated [Q]	3	23	10	A0A2P1BXV0; F8SGM9; F8SGM7	4	4098.14	36	H	NF	NF	NF	NF	NF	NF	1.91	3	1366.73	6.23	29.9976
	H	SQQQQQPPFSQQQQQPIL		4	39	4	A0A2P1BXV0; V9P785; F8SGM9; F8SGM7	2	2138.06	18	NF	NF	NF	NF	H	NF	H	1.58	2	1069.53	-0.67	20.8326
	H	YQQQQPIQQQPQPF		13	65	7	A2IBK1; Q8W3X5; A0A2P1BXV0; V9P785; F8SGM9; R4JB62; A2IBJ9; A8CA05; F8SGM7; A7X9Y0; Q68VI0; F8SGN9; B8Y0L6	1	1757.86	14	NF	NF	H	H	H	NF	H	1.72	2	879.434	-0.44	16.7584
	H	YQQQQPIQQQPQPFPQQPPCSQQQQPPLSQQQQPPF	1xDeamidated [Q]; 1xCarbamidomethyl [C20]	9	48	4	A2IBK1; Q8W3X5; A0A2P1BXV0; V9P785; F8SGM9; A8CA05; F8SGM7; F8SGN9; B8Y0L6	3	4313.05	36	H	NF	NF	NF	NF	NF	NF	1.09	3	1438.36	6.67	24.9959
	H	YQQQQPIQQQPQPFPQQPPCSQQQQPPLSQQQQPPF	2xDeamidated [Q]; 1xCarbamidomethyl [C20]	9	48	3	A2IBK1; Q8W3X5; A0A2P1BXV0; V9P785; F8SGM9; A8CA05; F8SGM7; F8SGN9; B8Y0L6	3	4314.03	36	NF	NF	NF	NF	H	H	NF	1.15	3	1438.7	9.47	25.1866
TRUE	Master Protein	D5FPF4	Low-molecular-weight glutenin subunit OS=Aegilops bicornis OX=4483 GN=GluB3-4 PE=4 SV=1	68.7679	28	1007	2	1	349	39.6	8.32	H	H	H	H	H	H	H	838.94	28
	Confidence	Sequence	Modifications	# Protein Groups	# Proteins	# PSMs	Master Protein Accessions	# Missed Cleavages	Theo. MH+ [Da]	Sequence Length	Found in Sample Group: 1_AG38Duetto	Found in Sample Group: 5_AG167PI	Found in Sample Group: S_Semola	Found in Sample Group: 4_AG77Neolatino	Found in Sample Group: 3_AG69Lloyd	Found in Sample Group: SI_SemolaIntegrale	Found in Sample Group: 2_AG33Colosseo	XCorr Sequest HT	Charge Sequest HT	m/z [Da] Sequest HT	DeltaM [ppm] Sequest HT	RT [min] Sequest HT
	H	CSVNVPVY	1xCarbamidomethyl [C1]	22	93	3	A2IBK1; Q8W3X5; A0A2P1BXV0; Q6J6V0; A0A0U3ANN8; A0A346R8U1; R4JAP5; A9YWM3; D3U329; F8SGM9; A0A2R4Q9T1; R4JB62; D5FPF3; A0A0U3AIG6; C8CCM8; A2IBJ9; D5FPE9; A8CA05; F8SGM7; D5FPF4; Q68VI0; F8SGN9	3	937.445	8	NF	NF	H	NF	H	NF	H	1.18	1	937.444	-0.8	16.9848
	H	DAIRAIIY		25	101	217	A2IBK1; Q8W3X5; A0A2P1BXV0; Q6J6V0; A0A0U3ANN8; R4JAP5; A9YWM3; D5FPF1; D3U329; V9P785; F8SGM9; A0A2R4Q9T1; R4JB62; D5FPF3; A0A0U3AIG6; Q41552; C8CCM8; A2IBJ9; D5FPE9; A8CA05; F8SGM7; D5FPF4; Q68VI0; F8SGN9; B8Y0L6	0	934.536	8	H	H	H	H	H	H	H	2.32	2	467.772	0.44	19.2101
	H	GQWPQQQQVPQGTL		22	88	15	A2IBK1; Q8W3X5; A0A2P1BXV0; Q6J6V0; A0A0U3ANN8; R4JAP5; A9YWM3; D3U329; V9P785; F8SGM9; A0A2R4Q9T1; R4JB62; D5FPF3; A0A0U3AIG6; C8CCM8; A2IBJ9; A8CA05; F8SGM7; D5FPF4; Q68VI0; F8SGN9; B8Y0L6	1	1594.8	14	H	H	H	H	H	H	H	2.49	2	797.901	-1.57	19.641
	H	GQWPQQQQVPQGTLLQPHQIAQL		20	86	3	A2IBK1; Q8W3X5; A0A2P1BXV0; Q6J6V0; A0A0U3ANN8; R4JAP5; A9YWM3; D3U329; V9P785; F8SGM9; A0A2R4Q9T1; R4JB62; D5FPF3; A0A0U3AIG6; C8CCM8; A2IBJ9; A8CA05; D5FPF4; Q68VI0; F8SGN9	3	2623.37	23	NF	NF	NF	H	H	NF	NF	1.39	3	875.128	-1.24	25.9172
	H	GTTTIVPF		12	67	14	Q8W3X5; A0A2P1BXV0; A0A0U3ANN8; F8SGM9; R4JB62; C8CCM8; A2IBJ9; A8CA05; F8SGM7; D5FPF4; Q68VI0; F8SGN9	0	835.456	8	H	H	H	H	H	H	H	1.56	1	835.456	0.58	24.7638
	H	GVGTRVGAY		18	72	20	A2IBK1; Q8W3X5; A0A2P1BXV0; A0A0U3ANN8; R4JAP5; A9YWM3; D5FPF1; D3U329; F8SGM9; R4JB62; D5FPF3; C8CCM8; A2IBJ9; A8CA05; F8SGM7; D5FPF4; F8SGN9; B8Y0L6	0	879.468	9	H	H	H	H	H	H	H	1.63	2	440.237	-1.23	3.9266
	H	LPQQPPFSQQQPPF		11	66	12	Q8W3X5; A0A2P1BXV0; A0A0U3ANN8; A9YWM3; V9P785; F8SGM9; R4JB62; A0A0U3AIG6; F8SGM7; D5FPF4; B8Y0L6	2	1638.83	14	NF	NF	H	H	H	H	H	2.28	2	819.917	-0.39	25.3965
	H	LQQQCSPVAMPQSL	1xCarbamidomethyl [C5]	33	198	8	R9XVA5; A2IBK1; Q8W3X5; A0A2P1BXV0; D5FPE3; C8CCM7; Q6J6V0; A2IBV5; A9YWM3; D5FPF1; D3U329; V9P785; F8SGM9; Q8W3W8; R4JDM1; A0A2R4Q9T1; K0I5W1; R4JB62; D5FPF3; A0A0U3AGE0; Q41552; Q8W3X4; C8CCM8; A2IBJ9; A8CA05; F8SGM7; D5FPF4; Q68VI0; F8SGN9; Q8W3X0; B2Y2R6; B8Y0L6; A0A0U3ATU4	1	1586.77	14	NF	NF	H	H	H	H	H	1.9	2	793.886	-1	21.583
	H	PQQPPFSQQQQPILPQQPPF	2xDeamidated [Q]	5	38	37	C8CCM7; R4JB62; A7X9Y0; D5FPF4; A0A0U3ATU4	2	2332.16	20	NF	H	H	NF	H	H	NF	1.65	3	778.06	1.51	20.0232
	H	QQPQQQQL		26	108	96	G0YLZ2; A2IBK1; Q8W3X5; A0A2P1BXV0; A0A0U3ANN8; Q5XXZ7; R4JAP5; A9YWM3; D5FPF1; V9P785; F8SGM9; R4JB62; D5FPF3; A0A0U3AGE0; A0A0U3AIG6; C8CCM8; A2IBJ9; D5FPE9; A8CA05; F8SGM7; D4HNA5; D5FPF4; F5A7G6; Q68VI0; F8SGN9; B8Y0L6	0	997.506	8	H	H	H	H	H	H	H	2.65	1	997.505	-0.95	3.8091
	H	QQPQQQQL	1xGln->pyro-Glu [N-Term]	25	103	5	G0YLZ2; A2IBK1; Q8W3X5; A0A2P1BXV0; A0A0U3ANN8; Q5XXZ7; R4JAP5; A9YWM3; D5FPF1; V9P785; F8SGM9; R4JB62; D5FPF3; A0A0U3AIG6; C8CCM8; A2IBJ9; D5FPE9; A8CA05; F8SGM7; D4HNA5; D5FPF4; F5A7G6; Q68VI0; F8SGN9; B8Y0L6	0	980.48	8	NF	NF	NF	NF	H	H	H	1.55	2	490.743	-0.23	11.7416
	H	QQQPIPL		17	76	166	A2IBK1; Q8W3X5; A0A2P1BXV0; A0A0U3ANN8; A9YWM3; V9P785; F8SGM9; R4JB62; C8CCM8; A2IBJ9; A8CA05; F8SGM7; A7X9Y0; D5FPF4; Q68VI0; F8SGN9; B8Y0L6	0	823.467	7	H	H	H	H	H	H	H	1.76	1	823.466	-0.9	16.4551
[truncated: 8,436 more rows]

## Sheet: Table S2
Table S2: Full list of GD resistant peptides
[truncated: 37,231 more rows]

## Sheet: Table S3
Table S3: Full list of CD epitopes detected and their distribution among different genotypes and set of samples (*source http://www.allergenonline.org/celiachome.shtml, accessed in June 2019).
[truncated: 156 more rows]

[truncated: 1 more sheets: Table S4]
